# Supplementary material for: Plastids Retained a Functional Prokaryotic-Like Protein Secretion Pathway That Can Export Proteins Synthesized in Chloroplasts into the Cytoplasm
Source: Research Square preprint supplement (doi:10.21203/rs.3.rs-7128036/v1), 2025-07-28
Supplement: Supplementary file 1 [file 4d2c2ed01d6e835472ab266d.xlsx]

## Sheet: Table S1
Supporting table for Figure S1E & S2: Xylanase, SpXylanase Immunoprecipitation
Sl no	Sample details (Band Id )	Accession no - Description [Source]		Unique peptides (sequences)	Seq coverage (%)	Theoretical molecular weight (kDa)	observed mass	Theoretical mass	Peptide sequences + modification	MOWSE score
		NCBInr DB	Protein sequence DB [Inhouse]	NCBInr / Protein seq DB
1	1	gi|116667128 - Chain A, An Alkali Thermostable F10 XYLANASE [Bacillus Sp. Ng-27]	Xylanase [In house]	11 / 11*	47	40.815	4142.01	4141.01	K.HHYNSIVAENAMKPISLQPEEGVFTWDGADAIVEFAR.K	76
							3914.7	3913.69	R.FHTLVWHNQVPDWFFLDEEGNPMVEETNEAKR.Q
							1213.63	1212.62	R.QANKELLLER.L
							2636.1	2635.09	R.YKDDVTAWDVVNEVVDDGTPNER.G
							1758.77	1757.76	R.ESVWYQITGDEYIR.V
							1553.72	1552.71	K.LFINDYNTEVTPK.R
							835.377	834.369	R.FQAQADR.Y
							2202.92	2201.91	R.EYNDGVGKDAPFVFDPNYR.V
							1340.58	1339.58	K.DAPFVFDPNYR.V
							2225.01	2224.01	K.DAPFVFDPNYRVKPAFWR.I
2	2	gi|116667128 - Chain A, An Alkali Thermostable F10 XYLANASE [Bacillus Sp. Ng-27]	Xylanase [In house]	18 / 18*	69	40.815	4142.11	4141.1	K.HHYNSIVAENAMKPISLQPEEGVFTWDGADAIVEFAR.K	121
							4158.08	4157.07	K.HHYNSIVAENAMKPISLQPEEGVFTWDGADAIVEFAR.K + Oxidation (M)
							889.422	888.415	R.KNNMNLR.F
							905.416	904.409	R.KNNMNLR.F + Oxidation (M)
							3914.74	3913.73	R.FHTLVWHNQVPDWFFLDEEGNPMVEETNEAKR.Q
							3930.74	3929.73	R.FHTLVWHNQVPDWFFLDEEGNPMVEETNEAKR.Q + Oxidation (M)
							1213.65	1212.64	R.QANKELLLER.L
							772.413	771.406	K.ELLLER.L
							2636.18	2635.17	R.YKDDVTAWDVVNEVVDDGTPNER.G
							1758.8	1757.79	R.ESVWYQITGDEYIR.V
							793.38	792.373	R.VAFETAR.K
							1553.74	1552.73	K.LFINDYNTEVTPK.R
							4332.33	4331.33	K.RDHLYNLVQDLLADGVPIDGVGHQAHIQIDWPTIDEIR.T
							835.363	834.356	R.FQAQADR.Y
							3975.81	3974.81	R.YNQLFELYEELDADLSSVTFWGIADNHTWLDDR.A
							2202.97	2201.96	R.EYNDGVGKDAPFVFDPNYR.V
							1340.58	1339.57	K.DAPFVFDPNYR.V
							903.45	902.443	R.VKPAFWR.I
3	3	gi|116667128 - Chain A, An Alkali Thermostable F10 XYLANASE [Bacillus Sp. Ng-27]	Xylanase [In house]	18 / 18	62	40.815	4142.1	4141.09	K.HHYNSIVAENAMKPISLQPEEGVFTWDGADAIVEFAR.K	128
							4158.05	4157.04	K.HHYNSIVAENAMKPISLQPEEGVFTWDGADAIVEFAR.K + Oxidation (M)
							889.423	888.416	R.KNNMNLR.F
							3914.74	3913.73	R.FHTLVWHNQVPDWFFLDEEGNPMVEETNEAKR.Q
							3930.72	3929.72	R.FHTLVWHNQVPDWFFLDEEGNPMVEETNEAKR.Q + Oxidation (M)
							1213.65	1212.64	R.QANKELLLER.L
							772.409	771.402	K.ELLLER.L
							1493.78	1492.77	K.ELLLERLETHIK.T
							2636.18	2635.17	R.YKDDVTAWDVVNEVVDDGTPNER.G
							1758.79	1757.78	R.ESVWYQITGDEYIR.V
							793.376	792.369	R.VAFETAR.K
							1553.74	1552.73	K.LFINDYNTEVTPK.R
							1709.82	1708.81	K.LFINDYNTEVTPKR.D
							4332.29	4331.29	K.RDHLYNLVQDLLADGVPIDGVGHQAHIQIDWPTIDEIR.T
							835.345	834.338	R.FQAQADR.Y
							2202.97	2201.97	R.EYNDGVGKDAPFVFDPNYR.V
							1340.58	1339.57	K.DAPFVFDPNYR.V
							903.482	902.475	R.VKPAFWR.I
4	4	gi|116667128 - Chain A, An Alkali Thermostable F10 XYLANASE [Bacillus Sp. Ng-27]	Xylanase [In house]	12 / 13*	49	40.815	1587.84	1586.84	VQPFAWQVASLADR.Y**	86
							4142.25	4141.25	K.HHYNSIVAENAMKPISLQPEEGVFTWDGADAIVEFAR.K
							4158.23	4157.23	K.HHYNSIVAENAMKPISLQPEEGVFTWDGADAIVEFAR.K + Oxidation (M)
							889.464	888.457	R.KNNMNLR.F
							1213.72	1212.71	R.QANKELLLER.L
							2636.35	2635.34	R.YKDDVTAWDVVNEVVDDGTPNER.G
							1758.89	1757.88	R.ESVWYQITGDEYIR.V
							793.395	792.388	R.VAFETAR.K
							1553.82	1552.82	K.LFINDYNTEVTPK.R
							4332.52	4331.51	K.RDHLYNLVQDLLADGVPIDGVGHQAHIQIDWPTIDEIR.T
							2203.1	2202.09	R.EYNDGVGKDAPFVFDPNYR.V
							1340.67	1339.66	K.DAPFVFDPNYR.V
							903.54	902.533	R.VKPAFWR.I
	* - denotes the Protein identification output from In house Protein sequence Database
	** - m/z 1587.844 from Band ID:4 corresponds to N-terminal region of processed SP-Xylanase
	Please refer figs. S1A and S1B for Peptide Mas Fingerprint (PMF) pattern

## Sheet: Table S2
Sl no	Sample details	Accession no - Description [Source]		Unique peptides (sequences)	Seq coverage (%)	emPAI	MOWSE score	observed mass	Theoretical mass	Peptide sequences + modification	Ion score
		NCBInr DB	Protein Sequence DB
1	SpGFP from E.coli broth digested with GluC	gi|155663 - green-fluorescent protein [Aequorea victoria]	SpGFP 277 [In house]	4	17	0.7	323	2262.22	2261.21	GGASSVFAQGNGQAGPPKGGIFKE.G + Deamidated (NQ)**	108	Signal peptide region
								1186.8	1185.79	E.LFTGVVPILVE.L	63
								1348.71	1347.7	E.FVTAAGITHGMDE.L	102
								1364.71	1363.71	E.FVTAAGITHGMDE.L + Oxidation (M)	102
2	SpGFP from E.coli broth digested with Trypsin	gi|158939741 - modified green fluorescent protein [Binary vector pCLEAN-G147]	SpGFP 277 [In house]	11	38	3.32	617	1503.68	1502.67	K.FSVSGEGEGDATYGK.L	133
								1266.63	1265.62	K.SAMPEGYVQER.T	89
								1347.72	1346.72	R.TIFFKDDGNYK.T	77
								1477.83	1476.82	R.AEVKFEGDTLVNR.I	108
								1050.51	1049.51	K.FEGDTLVNR.I	70
								1542.81	1541.8	K.GIDFKEDGNILGHK.L	88
								1974.01	1973	K.LEYNYNSHNVYIMADK.Q	106
								1990.06	1989.06	K.LEYNYNSHNVYIMADK.Q + Oxidation (M)	114
								2590.34	2589.33	R.DHMVLLEFVTAAGITHGMDELYK.H	155
								2606.34	2605.33	R.DHMVLLEFVTAAGITHGMDELYK.H +Oxidation (M)	97
								3084.64	3083.63	R.DHMVLLEFVTAAGITHGMDELYKHDEL.-	102
	For complete list of proteins and peptides identified in the above mentioned samples please see sheet 1 and sheet 2
	**-For MS/MS spectrum please refer Figure S3

## Sheet: Sheet 1
LC-MALDI analysis of SpGFP isolated from E.coli broth and digested with GluC
Database	NCBInr
Fasta file	NCBInr_20131215.fasta
Total sequences	35099569
Total residues	12354844215
Sequences after taxonomy filter	35099569
Number of queries	403
Fixed modifications
Identifier	Name	Delta	Neutral loss
1	Carbamidomethyl (C)	57.0215
Variable modifications
Identifier	Name	Delta	Neutral loss(es)
1	Deamidated (NQ)	0.984016
2	Oxidation (M)	15.9949	0	63.9983
Search Parameters
Taxonomy filter	All entries
Enzyme	V8-DE
Maximum Missed Cleavages	1
Fixed modifications	Carbamidomethyl (C)
Variable modifications	Deamidated (NQ),Oxidation (M)
Peptide Mass Tolerance	100 ppm
Fragment Mass Tolerance	0.75 Da
Mass values	Monoisotopic
Instrument type	MALDI-TOF-TOF
Decoy database also searched	1
USER00	PEP_INT(70.034890:211.176815,129.162330:248.663075,155.161953:179.895488,226.185015:223.127632,323.314915:658.204796,451.228900:149.960713,522.310755:171.841294,550.405988:173.817867,697.438981:165.234009,825.604951:182.775104,875.664799:212.853583,972.700323:1980.864607,1029.705925:1120.227862,1100.729463:721.791299,1138.786199:194.443148,1228.851686:195.817595,1285.831862:3736.542209,1383.90422…
Significance threshold	0.05
Max. number of hits	0
Use MudPIT protein scoring	1
Ions score cut-off	60
Include same-set proteins	0
Include sub-set proteins	0
Include unassigned	0
Require bold red	0
Use homology threshold	1
Group protein families	1
prot_hit_num	prot_family_member	prot_acc	prot_desc	prot_score	prot_mass	prot_matches	prot_matches_sig	prot_sequences	prot_sequences_sig	pep_query	pep_rank	pep_isbold	pep_isunique	pep_exp_mz	pep_exp_mr	pep_exp_z	pep_calc_mr	pep_delta	pep_miss	pep_score	pep_expect	pep_res_before	pep_seq	pep_res_after	pep_var_mod	pep_var_mod_pos	pep_summed_mod_pos	pep_scan_title
1	1	gi|133874615	VSPase [Staphylococcus aureus]	575	36717	7	7	4	4	131	1	1	1	1924.13	1923.12	1	1923.02	0.0993	1	127.24	5.8e-09	D	LAIVKFSPNEQNKHIGE	V				c545029d-3f38-46d7-9305-d28972eebaf5
1	1	gi|133874615	VSPase [Staphylococcus aureus]	575	36717	7	7	4	4	187	1	1	1	2268.26	2267.25	1	2267.15	0.1052	0	161.07	3.1e-13	E	VIGIHWGGVPNQFNGAVFINE	N				8e181a21-31ed-4e91-a57f-bf7959af34d9
1	1	gi|133874615	VSPase [Staphylococcus aureus]	575	36717	7	7	4	4	188	1	1	1	2269.28	2268.27	1	2268.13	0.1391	0	155.34	2.1e-11	E	VIGIHWGGVPNQFNGAVFINE	N	Deamidated (NQ)	0.000000000000010000000.0		0586e195-cbc9-4864-ad32-a1c342b181e0
1	1	gi|133874615	VSPase [Staphylococcus aureus]	575	36717	7	7	4	4	236	1	1	1	2549.41	2548.4	1	2548.23	0.1727	1	150.81	9.2e-12	E	TQVNQNITVTGYPGDKPVATMWE	S				c6db221c-276e-4402-99b1-43e16b9e3103
1	1	gi|133874615	VSPase [Staphylococcus aureus]	575	36717	7	7	4	4	238	1	1	1	2565.37	2564.36	1	2564.22	0.1404	1	135.94	8.2e-11	E	TQVNQNITVTGYPGDKPVATMWE	S	Oxidation (M)	0.00000000000000000000200.0		869a9aa0-1a32-4931-8b92-9733e1ed4414
1	1	gi|133874615	VSPase [Staphylococcus aureus]	575	36717	7	7	4	4	239	1	1	1	2565.4	2564.39	1	2564.22	0.1679	1	85.89	1.8e-05	E	TQVNQNITVTGYPGDKPVATMWE	S	Oxidation (M)	0.00000000000000000000200.0		e458b076-648f-4cdd-a95d-71929febcd3b
1	1	gi|133874615	VSPase [Staphylococcus aureus]	575	36717	7	7	4	4	315	1	1	1	3040.5	3039.49	1	3039.41	0.0821	1	65.07	0.00016	D	ATHGDPHALKAFPSAINQDNYPNGGFTAE	Q				0ce1eb79-2f81-45c0-9bcc-53be4f2a3cd7
2	1	gi|155663	green-fluorescent protein [Aequorea victoria]	148	27017	3	3	2	2	28	1	1	0	1186.8	1185.79	1	1185.7	0.0877	0	62.72	0.0077	E	LFTGVVPILVE	L				df857cc9-64bb-40bc-85a6-72bade6111ad
2	1	gi|155663	green-fluorescent protein [Aequorea victoria]	148	27017	3	3	2	2	50	1	1	1	1348.71	1347.7	1	1347.61	0.0866	1	101.62	7.4e-06	E	FVTAAGITHGMDE	L				71216080-8315-4e50-88cf-f21b39e344bb
2	1	gi|155663	green-fluorescent protein [Aequorea victoria]	148	27017	3	3	2	2	53	1	1	1	1364.71	1363.71	1	1363.61	0.0981	1	103.89	4.3e-06	E	FVTAAGITHGMDE	L	Oxidation (M)	0.0000000000200.0		5ef6fadd-a147-4763-a674-11d0098136a1
2	2	gi|122920877	Chain A, Yellow Fluorescent Protein - Glutaredoxin Fusion Protein	74	40960	2	2	2	2	28	1	0	0	1186.8	1185.79	1	1185.7	0.0877	0	62.72	0.0077	E	LFTGVVPILVE	L				df857cc9-64bb-40bc-85a6-72bade6111ad
2	2	gi|122920877	Chain A, Yellow Fluorescent Protein - Glutaredoxin Fusion Protein	74	40960	2	2	2	2	55	1	0	1	1370.7	1369.69	1	1369.64	0.0487	0	62.6	0.0022	E	FVTAAGITHGMHE	L				cbbbe4b3-b38a-4737-8836-f668f847bde3
3	1	gi|446188080	sugar ABC transporter substrate-binding protein [Escherichia coli]	137	34404	2	2	2	2	40	1	1	1	1257.79	1256.79	1	1256.71	0.0721	1	85.85	0.00011	E	GKLIGDWLVKE	V				50980854-f87a-4933-821d-b89f555b93bf
3	1	gi|446188080	sugar ABC transporter substrate-binding protein [Escherichia coli]	137	34404	2	2	2	2	161	1	1	1	2051.16	2050.15	1	2050.12	0.0338	1	111.31	5.5e-07	E	KLTLTKSTLYLPNTAKEE	L	Deamidated (NQ)	0.000000000000100000.0		8fd7f6e9-2ada-4d98-a7db-55726fcbe1a7
4	1	gi|15803860	FKBP-type peptidylprolyl isomerase [Escherichia coli O157:H7 str. EDL933]	136	28892	1	1	1	1	91	1	1	1	1695.03	1694.02	1	1693.93	0.0995	0	136.27	9.5e-10	E	KGVKTSSTGLVYQVVE	A				6f43ddd7-5f5e-4da4-a509-bd02226c1244
5	1	gi|15800369	glutamate and aspartate transporter subunit [Escherichia coli O157:H7 str. EDL933]	103	33442	1	1	1	1	81	1	1	1	1618.93	1617.92	1	1617.85	0.0666	1	102.84	1.8e-06	E	MKALFKEPNDKALN	-				97a039db-590b-4fe9-8977-6c80cc8b65ae
6	1	gi|15924037	cysteine protease [Staphylococcus aureus subsp. aureus Mu50]	96	44681	1	1	1	1	64	1	1	1	1464.8	1463.79	1	1463.71	0.0803	1	96.02	1.4e-05	E	KLIYWNPWDTE	L				28506d67-027c-4a06-823a-64a00575d03d
7	1	gi|491096037	carboxymethylenebutenolidase [Serratia odorifera]	87	30954	1	1	1	1	226	1	1	1	2506.29	2505.28	1	2505.17	0.108	1	86.75	3.8e-06	D	IVVYPQAGHAFNADYRPSYHAE	S	Deamidated (NQ)	0.0000010000000000000000.0		5840bf84-09a1-4ff3-aa6e-e7b64376968a
8	1	gi|487669128	elongation factor Tu 1, partial [Escherichia coli]	82	14083	2	2	2	2	51	1	1	1	1351.88	1350.88	1	1350.78	0.0986	0	60.92	0.00035	E	HILLGRQVGVPY	-				d083124d-5ccb-46a2-b1b3-4bc674b0dfbd
8	1	gi|487669128	elongation factor Tu 1, partial [Escherichia coli]	82	14083	2	2	2	2	116	1	1	1	1826.03	1825.03	1	1824.94	0.0864	1	71.71	0.0054	D	GAILVVAATDGPMPQTRE	H				4cf339f8-1a3c-4c02-adf7-dcacb7f65e8e
9	1	gi|223138	protein I,membrane	75	37197	1	1	1	1	118	1	1	1	1838.98	1837.98	1	1837.9	0.08	1	75.35	0.0027	E	GFGIVGAYGAADRTNLQE	A				ec072c39-4b5b-48f7-90c2-dfee1fdb7d5a
10	1	gi|270341219	elongation factor Tu [Klebsiella pneumoniae]	74	28872	1	1	1	1	72	1	1	1	1526.99	1525.99	1	1525.85	0.1373	1	74.01	0.00069	E	RAIDKPFLLPIQD	V	Deamidated (NQ)	0.0000000000010.0		a5f7700b-f209-4daf-9cf7-0cfdf80b877d
11	1	gi|2285882	Aalpha subunit of acetyl-CoA carboxylase [Escherichia coli W3110]	68	16530	1	1	1	1	177	1	1	1	2169.36	2168.36	1	2168.2	0.1611	1	68.34	0.001	E	LKLIDSIIPEPLGGAHRNPE	A				bf8ea663-bbb2-4676-8543-5635a380dded
12	1	gi|542095723	translation elongation factor G [Serratia sp. ATCC 39006]	64	77453	1	1	1	1	126	1	1	1	1894.05	1893.04	1	1892.95	0.0869	1	64.17	0.025	E	FLKYSEAPNNVAQAVIE	A	Deamidated (NQ)	0.00000000100000000.0		eceab914-2590-4dcf-ba6f-98ff19b73dd3

## Sheet: Sheet 2
LC-MALDI analysis of SpGFP isolated from E.coli broth and digested with Trypsin
Database	NCBInr
Fasta file	NCBInr_20131215.fasta
Total sequences	35099569
Total residues	12354844215
Sequences after taxonomy filter	35099569
Number of queries	942
Number of matches above identity threshold in search of real database	140
Number of matches above identity threshold in search of decoy database	1
Number of matches above homology threshold in search of real database	166
Number of matches above homology threshold in search of decoy database	1
Fixed modifications
Identifier	Name
1	Carbamidomethyl (C)	Delta	Neutral loss
		57.0215
Variable modifications
Identifier	Name
1	Oxidation (M)	Delta	Neutral loss(es)
		15.9949	0	63.9983
Search Parameters
Taxonomy filter	All entries
Enzyme	Trypsin
Maximum Missed Cleavages	1
Fixed modifications	Carbamidomethyl (C)
Variable modifications	Oxidation (M)
Peptide Mass Tolerance	100 ppm
Fragment Mass Tolerance	0.75 Da
Mass values	Monoisotopic
Instrument type	MALDI-TOF-TOF
Decoy database also searched	1
USER00	PEP_INT()
Format parameters
Significance threshold	0.0005
Max. number of hits	0
Use MudPIT protein scoring	1
Ions score cut-off	77
Include same-set proteins	0
Include sub-set proteins	0
Include unassigned	0
Require bold red	0
Use homology threshold	1
Group protein families	1
prot_hit_num	prot_family_member
1	1	prot_acc	prot_desc	prot_score	prot_mass	prot_matches	prot_matches_sig	prot_sequences	prot_sequences_sig	pep_query	pep_rank	pep_isbold	pep_isunique	pep_exp_mz	pep_exp_mr	pep_exp_z	pep_calc_mr	pep_delta	pep_miss	pep_score	pep_expect	pep_res_before	pep_seq	pep_res_after	pep_var_mod	pep_var_mod_pos	pep_summed_mod_pos	pep_scan_title
1	1	gi|110643470	malate dehydrogenase [Escherichia coli 536]	1228	32502	16	16	12	12	165	1	0	1	1234.71	1233.7	1	1233.62	0.0794	0	89.91	4.7e-05	K	DIALGEEFVNK	-				b42c901d-b7f7-4db4-b7d2-350f8152bab8
1	1	gi|110643470	malate dehydrogenase [Escherichia coli 536]	1228	32502	16	16	12	12	174	1	0	0	1247.83	1246.82	1	1246.73	0.0952	0	102.38	6.9e-07	K	LFGVTTLDIIR	S				7af252c5-4f75-41a8-b972-4271b179123b
1	1	gi|110643470	malate dehydrogenase [Escherichia coli 536]	1228	32502	16	16	12	12	194	1	0	0	1276.73	1275.72	1	1275.68	0.038	0	116.21	1.1e-07	R	SDLFNVNAGIVK	N				06aa1eda-dfb0-4a51-8684-ae7474253bda
1	1	gi|110643470	malate dehydrogenase [Escherichia coli 536]	1228	32502	16	16	12	12	270	1	0	0	1405.78	1404.77	1	1404.68	0.0902	0	112.53	2.6e-07	K	AGGGSATLSMGQAAAR	F				e687c603-45c8-4057-8af2-55f812f371f2
1	1	gi|110643470	malate dehydrogenase [Escherichia coli 536]	1228	32502	16	16	12	12	422	1	0	1	1735.17	1734.17	1	1734.08	0.0886	0	170.22	1.8e-14	K	VAVLGAAGGIGQALALLLK	T				ddc60076-f473-4aed-a333-59c14b82bfdd
1	1	gi|110643470	malate dehydrogenase [Escherichia coli 536]	1228	32502	16	16	12	12	658	1	0	1	2238.17	2237.17	1	2237.12	0.0424	0	115.55	9.8e-09	K	SIGTLSAFEQNALEGMLDTLK	K				b5998b7e-a955-4a91-b2ea-cd4277880419
1	1	gi|110643470	malate dehydrogenase [Escherichia coli 536]	1228	32502	16	16	12	12	666	1	0	1	2254.31	2253.3	1	2253.12	0.1809	0	133.76	9.6e-10	K	SIGTLSAFEQNALEGMLDTLK	K	Oxidation (M)	0.000000000000000100000.0		55d3f9ca-0528-48c7-8ca1-308c37ab0336
1	1	gi|110643470	malate dehydrogenase [Escherichia coli 536]	1228	32502	16	16	12	12	668	1	0	0	2268.36	2267.35	1	2267.26	0.0933	0	117.22	3.1e-08	K	ACIGIITNPVNTTVAIAAEVLK	K				9c439853-d049-4dd1-8180-6f323c64d290
1	1	gi|110643470	malate dehydrogenase [Escherichia coli 536]	1228	32502	16	16	12	12	703	1	0	1	2366.27	2365.26	1	2365.22	0.0416	1	173.97	4.5e-14	K	SIGTLSAFEQNALEGMLDTLKK	D				afb40985-7a5c-45ed-b836-393bae71d737
1	1	gi|110643470	malate dehydrogenase [Escherichia coli 536]	1228	32502	16	16	12	12	704	1	0	1	2366.28	2365.28	1	2365.22	0.0555	1	136.68	1.5e-10	K	SIGTLSAFEQNALEGMLDTLKK	D				20004c0c-4d65-496f-9456-eff82c622bb0
1	1	gi|110643470	malate dehydrogenase [Escherichia coli 536]	1228	32502	16	16	12	12	712	1	0	1	2382.29	2381.28	1	2381.21	0.0679	1	147.91	1.1e-11	K	SIGTLSAFEQNALEGMLDTLKK	D	Oxidation (M)	0.0000000000000001000000.0		a444b12a-6753-47df-846b-da51fa5169ad
1	1	gi|110643470	malate dehydrogenase [Escherichia coli 536]	1228	32502	16	16	12	12	725	1	0	0	2402.39	2401.38	1	2401.21	0.167	0	231.79	1.5e-19	K	GFSGEDATPALEGADVVLISAGVAR	K				c425bb50-7e1e-48c0-9bf4-583672c935e0
1	1	gi|110643470	malate dehydrogenase [Escherichia coli 536]	1228	32502	16	16	12	12	730	1	0	1	2413.09	2412.08	1	2412.1	-0.0202	0	104.42	9.8e-07	R	ALQGEQGVIECAYVEGDGQYAR	F				3a6db00b-c97e-4776-a311-92878b651768
1	1	gi|110643470	malate dehydrogenase [Escherichia coli 536]	1228	32502	16	16	12	12	731	1	0	1	2413.24	2412.23	1	2412.1	0.1268	0	191.05	2.3e-15	R	ALQGEQGVIECAYVEGDGQYAR	F				0d5e240c-9e21-44f8-b569-5ae6ad297b1b
1	1	gi|110643470	malate dehydrogenase [Escherichia coli 536]	1228	32502	16	16	12	12	803	1	0	0	2643.57	2642.57	1	2642.39	0.1744	1	225.85	3.8e-19	K	IKGFSGEDATPALEGADVVLISAGVAR	K				b8a850dc-3b94-42c8-99e0-fc5789e4e5ed
1	2	gi|110643470	malate dehydrogenase [Escherichia coli 536]	1228	32502	16	16	12	12	915	1	0	0	3376.01	3375	1	3374.8	0.2027	0	169.11	1.1e-13	K	TQLPSGSELSLYDIAPVTPGVAVDLSHIPTAVK	I				ecb1ac36-0303-4799-ac63-b3ead76cbd8b
1	2	gi|23263482	malate dehydrogenase [Pantoea endophytica]	630	26530	8	8	7	7	174	1	0	0	1247.83	1246.82	1	1246.73	0.0952	0	102.38	6.9e-07	K	LFGVTTLDIIR	S				7af252c5-4f75-41a8-b972-4271b179123b
1	2	gi|23263482	malate dehydrogenase [Pantoea endophytica]	630	26530	8	8	7	7	194	1	0	0	1276.73	1275.72	1	1275.68	0.038	0	116.21	1.1e-07	R	SDLFNVNAGIVK	N				06aa1eda-dfb0-4a51-8684-ae7474253bda
1	2	gi|23263482	malate dehydrogenase [Pantoea endophytica]	630	26530	8	8	7	7	270	1	0	0	1405.78	1404.77	1	1404.68	0.0902	0	112.53	2.6e-07	K	AGGGSATLSMGQAAAR	F				e687c603-45c8-4057-8af2-55f812f371f2
1	2	gi|23263482	malate dehydrogenase [Pantoea endophytica]	630	26530	8	8	7	7	668	1	0	0	2268.36	2267.35	1	2267.26	0.0933	0	117.22	3.1e-08	K	ACIGIITNPVNTTVAIAAEVLK	K				9c439853-d049-4dd1-8180-6f323c64d290
1	2	gi|23263482	malate dehydrogenase [Pantoea endophytica]	630	26530	8	8	7	7	721	1	0	1	2399.12	2398.11	1	2398.12	-0.0122	1	188.09	4.4e-15	R	ALQGEKGVVECAYVEGDGQYAR	-				476b99a4-62a4-4d36-b1a2-e8b4096fe166
1	2	gi|23263482	malate dehydrogenase [Pantoea endophytica]	630	26530	8	8	7	7	722	1	0	1	2399.14	2398.13	1	2398.12	0.0066	1	204.32	1.3e-17	R	ALQGEKGVVECAYVEGDGQYAR	-				538a7592-5560-41d6-9445-58c1cad851ae
1	2	gi|23263482	malate dehydrogenase [Pantoea endophytica]	630	26530	8	8	7	7	731	3	0	1	2413.24	2412.23	1	2412.14	0.0904	1	144.97	9.3e-11	R	ALQGEKGVVECAYIEGDGQYAR	-				0d5e240c-9e21-44f8-b569-5ae6ad297b1b
1	3	gi|23263482	malate dehydrogenase [Pantoea endophytica]	630	26530	8	8	7	7	915	1	0	0	3376.01	3375	1	3374.8	0.2027	0	169.11	1.1e-13	K	TQLPSGSELSLYDIAPVTPGVAVDLSHIPTAVK	I				ecb1ac36-0303-4799-ac63-b3ead76cbd8b
1	3	gi|109453146	Mdh [Salmonella enterica subsp. salamae]	554	29204	6	6	6	6	174	1	0	0	1247.83	1246.82	1	1246.73	0.0952	0	102.38	6.9e-07	K	LFGVTTLDIIR	S				7af252c5-4f75-41a8-b972-4271b179123b
1	3	gi|109453146	Mdh [Salmonella enterica subsp. salamae]	554	29204	6	6	6	6	194	1	0	0	1276.73	1275.72	1	1275.68	0.038	0	116.21	1.1e-07	R	SDLFNVNAGIVK	N				06aa1eda-dfb0-4a51-8684-ae7474253bda
1	3	gi|109453146	Mdh [Salmonella enterica subsp. salamae]	554	29204	6	6	6	6	270	1	0	0	1405.78	1404.77	1	1404.68	0.0902	0	112.53	2.6e-07	K	AGGGSATLSMGQAAAR	F				e687c603-45c8-4057-8af2-55f812f371f2
1	3	gi|109453146	Mdh [Salmonella enterica subsp. salamae]	554	29204	6	6	6	6	714	1	0	1	2384.39	2383.38	1	2383.15	0.2308	1	145.98	5.3e-11	R	ALLGEKGVVECAYVEGDGQYAR	F				2673b98b-c46e-4fb4-be46-9d9c14b5a1b9
1	3	gi|109453146	Mdh [Salmonella enterica subsp. salamae]	554	29204	6	6	6	6	725	1	0	0	2402.39	2401.38	1	2401.21	0.167	0	231.79	1.5e-19	K	GFSGEDATPALEGADVVLISAGVAR	K				c425bb50-7e1e-48c0-9bf4-583672c935e0
2	1	gi|109453146	Mdh [Salmonella enterica subsp. salamae]	554	29204	6	6	6	6	803	1	0	0	2643.57	2642.57	1	2642.39	0.1744	1	225.85	3.8e-19	K	IKGFSGEDATPALEGADVVLISAGVAR	K				b8a850dc-3b94-42c8-99e0-fc5789e4e5ed
2	1	gi|82880399	surface displayed FLIPE 600n sensor protein [synthetic construct]	904	96779	20	20	14	14	184	1	1	0	1266.63	1265.62	1	1265.57	0.054	0	89.19	3.4e-06	K	SAMPEGYVQER	T				a0146ee3-4036-46ff-87bc-d0e0788e1fdf
2	1	gi|82880399	surface displayed FLIPE 600n sensor protein [synthetic construct]	904	96779	20	20	14	14	301	1	1	0	1477.83	1476.82	1	1476.76	0.0651	1	108.2	6.3e-07	R	AEVKFEGDTLVNR	I				2f7af849-8fc7-4ae2-a4f5-28da8a532fd2
2	1	gi|82880399	surface displayed FLIPE 600n sensor protein [synthetic construct]	904	96779	20	20	14	14	317	1	1	0	1503.68	1502.67	1	1502.65	0.0205	0	132.69	6.4e-10	K	FSVSGEGEGDATYGK	L				dde5fed2-9a8b-4514-9b56-d4d6870ee0e0
2	1	gi|82880399	surface displayed FLIPE 600n sensor protein [synthetic construct]	904	96779	20	20	14	14	318	1	1	0	1503.7	1502.69	1	1502.65	0.0385	0	125.56	7.4e-10	K	FSVSGEGEGDATYGK	L				9b7feddf-bd18-44a9-93cd-a462f17d125c
2	1	gi|82880399	surface displayed FLIPE 600n sensor protein [synthetic construct]	904	96779	20	20	14	14	323	1	1	1	1511.89	1510.88	1	1510.78	0.103	0	134.63	1.1e-09	K	QAAFSDTIFVVGTR	L				09f37bf4-467a-4411-8c43-09b050494bab
2	1	gi|82880399	surface displayed FLIPE 600n sensor protein [synthetic construct]	904	96779	20	20	14	14	334	1	1	0	1542.81	1541.8	1	1541.78	0.0178	1	87.88	1.8e-05	K	GIDFKEDGNILGHK	L				a5309f05-fc6e-4251-aa35-95eb491a0749
2	1	gi|82880399	surface displayed FLIPE 600n sensor protein [synthetic construct]	904	96779	20	20	14	14	335	2	1	0	1542.89	1541.89	1	1541.78	0.1037	1	122.2	2.2e-08	K	GIDFKEDGNILGHK	L				f4a5be4c-3b2b-4513-b695-0bc3ea373b5b
2	1	gi|82880399	surface displayed FLIPE 600n sensor protein [synthetic construct]	904	96779	20	20	14	14	351	1	1	1	1584.73	1583.72	1	1583.7	0.0275	0	109.95	3.9e-07	K	NLNMNFELSDEMK	A				39c2e127-5865-4048-8ba7-5cb6c32757a1
2	1	gi|82880399	surface displayed FLIPE 600n sensor protein [synthetic construct]	904	96779	20	20	14	14	370	1	1	1	1609.78	1608.77	1	1608.76	0.0078	0	128.83	5.6e-09	R	AVAFMMDDALLAGER	A				d4e3e556-6011-4ef4-b355-8cdd27f7c468
2	1	gi|82880399	surface displayed FLIPE 600n sensor protein [synthetic construct]	904	96779	20	20	14	14	375	1	1	1	1617.94	1616.94	1	1616.9	0.038	0	97.33	7.9e-07	K	AVVVTSGTTSEVLLNK	L				25c6ae43-970a-4fb5-9708-1d612b7b3dff
2	1	gi|82880399	surface displayed FLIPE 600n sensor protein [synthetic construct]	904	96779	20	20	14	14	376	1	1	1	1625.77	1624.77	1	1624.76	0.0067	0	82.92	0.00021	R	AVAFMMDDALLAGER	A	Oxidation (M)	0.000010000000000.0		00ab9599-8c6e-40b6-9097-84f90d0e24fd
2	1	gi|82880399	surface displayed FLIPE 600n sensor protein [synthetic construct]	904	96779	20	20	14	14	404	1	1	1	1691.8	1690.8	1	1690.75	0.049	0	104.82	1.4e-06	R	ESSVPFSYYDNQQK	V				d9c1375b-93a1-43d3-af43-05ad4ac57e52
2	1	gi|82880399	surface displayed FLIPE 600n sensor protein [synthetic construct]	904	96779	20	20	14	14	474	1	1	1	1835.92	1834.92	1	1834.86	0.0535	0	114.22	1.3e-08	K	LMDDTIAQVQTSGEAEK	W				b1cd7bf7-60e6-4207-80da-a9459072c1d3
2	1	gi|82880399	surface displayed FLIPE 600n sensor protein [synthetic construct]	904	96779	20	20	14	14	478	1	1	1	1841.99	1840.99	1	1840.92	0.066	0	139.59	4.2e-10	K	VVGYSQDYSNAIVEAVK	K				bfa0213d-eb12-406e-9ce5-da6f38278893
2	1	gi|82880399	surface displayed FLIPE 600n sensor protein [synthetic construct]	904	96779	20	20	14	14	552	1	1	1	1970.1	1969.09	1	1969.02	0.0744	1	117.86	5.2e-08	K	VVGYSQDYSNAIVEAVKK	K				6e6a601f-82b8-4217-879a-89a319602664
2	1	gi|82880399	surface displayed FLIPE 600n sensor protein [synthetic construct]	904	96779	20	20	14	14	555	1	1	0	1974.01	1973	1	1972.9	0.1045	0	106.23	2.1e-08	K	LEYNYNSHNVYIMADK	Q				ce40eead-c4a8-4e0b-bc5e-515a6aaa162b
2	1	gi|82880399	surface displayed FLIPE 600n sensor protein [synthetic construct]	904	96779	20	20	14	14	556	1	1	0	1974.06	1973.05	1	1972.9	0.153	0	120.98	5.5e-09	K	LEYNYNSHNVYIMADK	Q				aee6b5d8-59a3-4436-bd93-78a6bde9d947
2	1	gi|82880399	surface displayed FLIPE 600n sensor protein [synthetic construct]	904	96779	20	20	14	14	564	1	1	0	1990.06	1989.06	1	1988.89	0.1629	0	114.19	5.9e-08	K	LEYNYNSHNVYIMADK	Q	Oxidation (M)	0.0000000000001000.0		163c5a01-08b5-48f9-8a42-2826cbba2f35
2	1	gi|82880399	surface displayed FLIPE 600n sensor protein [synthetic construct]	904	96779	20	20	14	14	565	1	1	0	1990.07	1989.06	1	1988.89	0.168	0	87.97	3.1e-06	K	LEYNYNSHNVYIMADK	Q	Oxidation (M)	0.0000000000001000.0		f664f4bc-2580-4158-8cea-e3ddad943610
2	2	gi|82880399	surface displayed FLIPE 600n sensor protein [synthetic construct]	904	96779	20	20	14	14	789	1	1	1	2606.31	2605.31	1	2605.24	0.0643	0	177.05	5.3e-14	K	KPDNWEIVGKPQSQEAYGCMLR	K				74aa97d3-514c-4bb2-bac2-abb11e747953
2	2	gi|158939741	mGFP5-ER [Binary vector pCLEAN-G147]	617	29846	13	13	7	7	184	1	0	0	1266.63	1265.62	1	1265.57	0.054	0	89.19	3.4e-06	K	SAMPEGYVQER	T				a0146ee3-4036-46ff-87bc-d0e0788e1fdf
2	2	gi|158939741	mGFP5-ER [Binary vector pCLEAN-G147]	617	29846	13	13	7	7	301	1	0	0	1477.83	1476.82	1	1476.76	0.0651	1	108.2	6.3e-07	R	AEVKFEGDTLVNR	I				2f7af849-8fc7-4ae2-a4f5-28da8a532fd2
2	2	gi|158939741	mGFP5-ER [Binary vector pCLEAN-G147]	617	29846	13	13	7	7	317	1	0	0	1503.68	1502.67	1	1502.65	0.0205	0	132.69	6.4e-10	K	FSVSGEGEGDATYGK	L				dde5fed2-9a8b-4514-9b56-d4d6870ee0e0
2	2	gi|158939741	mGFP5-ER [Binary vector pCLEAN-G147]	617	29846	13	13	7	7	318	1	0	0	1503.7	1502.69	1	1502.65	0.0385	0	125.56	7.4e-10	K	FSVSGEGEGDATYGK	L				9b7feddf-bd18-44a9-93cd-a462f17d125c
2	2	gi|158939741	mGFP5-ER [Binary vector pCLEAN-G147]	617	29846	13	13	7	7	334	1	0	0	1542.81	1541.8	1	1541.78	0.0178	1	87.88	1.8e-05	K	GIDFKEDGNILGHK	L				a5309f05-fc6e-4251-aa35-95eb491a0749
2	2	gi|158939741	mGFP5-ER [Binary vector pCLEAN-G147]	617	29846	13	13	7	7	335	2	0	0	1542.89	1541.89	1	1541.78	0.1037	1	122.2	2.2e-08	K	GIDFKEDGNILGHK	L				f4a5be4c-3b2b-4513-b695-0bc3ea373b5b
2	2	gi|158939741	mGFP5-ER [Binary vector pCLEAN-G147]	617	29846	13	13	7	7	555	1	0	0	1974.01	1973	1	1972.9	0.1045	0	106.23	2.1e-08	K	LEYNYNSHNVYIMADK	Q				ce40eead-c4a8-4e0b-bc5e-515a6aaa162b
2	2	gi|158939741	mGFP5-ER [Binary vector pCLEAN-G147]	617	29846	13	13	7	7	556	1	0	0	1974.06	1973.05	1	1972.9	0.153	0	120.98	5.5e-09	K	LEYNYNSHNVYIMADK	Q				aee6b5d8-59a3-4436-bd93-78a6bde9d947
2	2	gi|158939741	mGFP5-ER [Binary vector pCLEAN-G147]	617	29846	13	13	7	7	564	1	0	0	1990.06	1989.06	1	1988.89	0.1629	0	114.19	5.9e-08	K	LEYNYNSHNVYIMADK	Q	Oxidation (M)	0.0000000000001000.0		163c5a01-08b5-48f9-8a42-2826cbba2f35
2	2	gi|158939741	mGFP5-ER [Binary vector pCLEAN-G147]	617	29846	13	13	7	7	565	1	0	0	1990.07	1989.06	1	1988.89	0.168	0	87.97	3.1e-06	K	LEYNYNSHNVYIMADK	Q	Oxidation (M)	0.0000000000001000.0		f664f4bc-2580-4158-8cea-e3ddad943610
2	2	gi|158939741	mGFP5-ER [Binary vector pCLEAN-G147]	617	29846	13	13	7	7	786	1	0	1	2590.34	2589.33	1	2589.26	0.074	0	155.19	7.8e-13	R	DHMVLLEFVTAAGITHGMDELYK	H				ae61c2e8-aad9-4daf-a73b-7dfaf84ea512
2	2	gi|158939741	mGFP5-ER [Binary vector pCLEAN-G147]	617	29846	13	13	7	7	791	1	0	1	2606.34	2605.33	1	2605.26	0.0762	0	99.81	1.6e-07	R	DHMVLLEFVTAAGITHGMDELYK	H	Oxidation (M)	0.00100000000000000000000.0		a6f4a1a3-5158-4a88-b6c3-5e9263a3a65f
2	3	gi|158939741	mGFP5-ER [Binary vector pCLEAN-G147]	617	29846	13	13	7	7	888	1	0	1	3084.64	3083.63	1	3083.47	0.1549	1	102.47	9.3e-08	R	DHMVLLEFVTAAGITHGMDELYKHDEL	-				e6c8cf15-73b1-4cfc-a012-638e8dac063f
2	3	gi|354459505	Chain A, Maltose-bound Maltose Sensor Engineered By Insertion Of Circularly Permuted Green Fluorescent Protein Into E. Coli Maltose Binding Protein At Position 175	466	73483	10	10	8	8	240	1	0	1	1337.85	1336.84	1	1336.74	0.1022	0	89.48	1.7e-05	K	VNYGVTVLPTFK	G				155cf050-9f78-45f4-a886-a186eedbfa7c
2	3	gi|354459505	Chain A, Maltose-bound Maltose Sensor Engineered By Insertion Of Circularly Permuted Green Fluorescent Protein Into E. Coli Maltose Binding Protein At Position 175	466	73483	10	10	8	8	301	1	0	0	1477.83	1476.82	1	1476.76	0.0651	1	108.2	6.3e-07	R	AEVKFEGDTLVNR	I				2f7af849-8fc7-4ae2-a4f5-28da8a532fd2
2	3	gi|354459505	Chain A, Maltose-bound Maltose Sensor Engineered By Insertion Of Circularly Permuted Green Fluorescent Protein Into E. Coli Maltose Binding Protein At Position 175	466	73483	10	10	8	8	317	1	0	0	1503.68	1502.67	1	1502.65	0.0205	0	132.69	6.4e-10	K	FSVSGEGEGDATYGK	L				dde5fed2-9a8b-4514-9b56-d4d6870ee0e0
2	3	gi|354459505	Chain A, Maltose-bound Maltose Sensor Engineered By Insertion Of Circularly Permuted Green Fluorescent Protein Into E. Coli Maltose Binding Protein At Position 175	466	73483	10	10	8	8	318	1	0	0	1503.7	1502.69	1	1502.65	0.0385	0	125.56	7.4e-10	K	FSVSGEGEGDATYGK	L				9b7feddf-bd18-44a9-93cd-a462f17d125c
2	3	gi|354459505	Chain A, Maltose-bound Maltose Sensor Engineered By Insertion Of Circularly Permuted Green Fluorescent Protein Into E. Coli Maltose Binding Protein At Position 175	466	73483	10	10	8	8	334	1	0	0	1542.81	1541.8	1	1541.78	0.0178	1	87.88	1.8e-05	K	GIDFKEDGNILGHK	L				a5309f05-fc6e-4251-aa35-95eb491a0749
2	3	gi|354459505	Chain A, Maltose-bound Maltose Sensor Engineered By Insertion Of Circularly Permuted Green Fluorescent Protein Into E. Coli Maltose Binding Protein At Position 175	466	73483	10	10	8	8	335	2	0	0	1542.89	1541.89	1	1541.78	0.1037	1	122.2	2.2e-08	K	GIDFKEDGNILGHK	L				f4a5be4c-3b2b-4513-b695-0bc3ea373b5b
2	3	gi|354459505	Chain A, Maltose-bound Maltose Sensor Engineered By Insertion Of Circularly Permuted Green Fluorescent Protein Into E. Coli Maltose Binding Protein At Position 175	466	73483	10	10	8	8	439	1	0	1	1767.04	1766.03	1	1765.89	0.14	0	125.44	8e-09	R	FGGYAQSGLLAEITPDK	A				f7021e23-a1a3-4de8-90b2-d2badd7b153b
2	3	gi|354459505	Chain A, Maltose-bound Maltose Sensor Engineered By Insertion Of Circularly Permuted Green Fluorescent Protein Into E. Coli Maltose Binding Protein At Position 175	466	73483	10	10	8	8	512	1	0	1	1891.16	1890.15	1	1890.09	0.0635	0	90.23	3.6e-06	K	LIAYPIAVEALSLIYNK	D				bb80446e-98a6-4e82-8298-f967491168d5
2	3	gi|354459505	Chain A, Maltose-bound Maltose Sensor Engineered By Insertion Of Circularly Permuted Green Fluorescent Protein Into E. Coli Maltose Binding Protein At Position 175	466	73483	10	10	8	8	609	1	0	1	2097.12	2096.11	1	2096.03	0.0812	0	161.82	2.2e-12	K	EFLENYLLTDEGLEAVNK	D				2961b70b-e4bc-46e1-ac44-5c76b7715960
2	4	gi|354459505	Chain A, Maltose-bound Maltose Sensor Engineered By Insertion Of Circularly Permuted Green Fluorescent Protein Into E. Coli Maltose Binding Protein At Position 175	466	73483	10	10	8	8	618	1	0	1	2139.21	2138.21	1	2138.15	0.0586	0	87.06	1.3e-05	K	GQPSKPFVGVLSAGINAASPNK	E				b8c10af4-df3f-4b1b-98c1-475797dda2ea
2	4	gi|124365235	GFP-aequorin fusion protein [synthetic construct]	318	53605	7	7	5	5	184	1	0	0	1266.63	1265.62	1	1265.57	0.054	0	89.19	3.4e-06	K	SAMPEGYVQER	T				a0146ee3-4036-46ff-87bc-d0e0788e1fdf
2	4	gi|124365235	GFP-aequorin fusion protein [synthetic construct]	318	53605	7	7	5	5	301	1	0	0	1477.83	1476.82	1	1476.76	0.0651	1	108.2	6.3e-07	R	AEVKFEGDTLVNR	I				2f7af849-8fc7-4ae2-a4f5-28da8a532fd2
2	4	gi|124365235	GFP-aequorin fusion protein [synthetic construct]	318	53605	7	7	5	5	317	1	0	0	1503.68	1502.67	1	1502.65	0.0205	0	132.69	6.4e-10	K	FSVSGEGEGDATYGK	L				dde5fed2-9a8b-4514-9b56-d4d6870ee0e0
2	4	gi|124365235	GFP-aequorin fusion protein [synthetic construct]	318	53605	7	7	5	5	318	1	0	0	1503.7	1502.69	1	1502.65	0.0385	0	125.56	7.4e-10	K	FSVSGEGEGDATYGK	L				9b7feddf-bd18-44a9-93cd-a462f17d125c
2	4	gi|124365235	GFP-aequorin fusion protein [synthetic construct]	318	53605	7	7	5	5	334	1	0	0	1542.81	1541.8	1	1541.78	0.0178	1	87.88	1.8e-05	K	GIDFKEDGNILGHK	L				a5309f05-fc6e-4251-aa35-95eb491a0749
2	4	gi|124365235	GFP-aequorin fusion protein [synthetic construct]	318	53605	7	7	5	5	335	2	0	0	1542.89	1541.89	1	1541.78	0.1037	1	122.2	2.2e-08	K	GIDFKEDGNILGHK	L				f4a5be4c-3b2b-4513-b695-0bc3ea373b5b
2	5	gi|124365235	GFP-aequorin fusion protein [synthetic construct]	318	53605	7	7	5	5	557	1	0	1	1975.04	1974.03	1	1973.88	0.147	0	81.84	8.8e-06	K	LEYDYNSHNVYIMADK	Q				ade6a4e0-f3e9-4efc-83a1-cf9329deebb7
2	5	gi|298257321	green fluorescent protein [synthetic construct]	188	26753	4	4	3	3	184	1	0	0	1266.63	1265.62	1	1265.57	0.054	0	89.19	3.4e-06	K	SAMPEGYVQER	T				a0146ee3-4036-46ff-87bc-d0e0788e1fdf
2	5	gi|298257321	green fluorescent protein [synthetic construct]	188	26753	4	4	3	3	301	1	0	1	1477.83	1476.82	1	1476.72	0.0981	1	108.2	6.3e-07	R	AEVKMEGDTLVNR	I	Oxidation (M)	0.0000100000000.0		2f7af849-8fc7-4ae2-a4f5-28da8a532fd2
2	5	gi|298257321	green fluorescent protein [synthetic construct]	188	26753	4	4	3	3	334	1	0	1	1542.81	1541.8	1	1541.75	0.0508	1	87.88	1.8e-05	K	GIDMKEDGNILGHK	L	Oxidation (M)	0.00010000000000.0		a5309f05-fc6e-4251-aa35-95eb491a0749
3	1	gi|298257321	green fluorescent protein [synthetic construct]	188	26753	4	4	3	3	335	1	0	1	1542.89	1541.89	1	1541.75	0.1367	1	125.4	1e-08	K	GIDMKEDGNILGHK	L	Oxidation (M)	0.00010000000000.0		f4a5be4c-3b2b-4513-b695-0bc3ea373b5b
3	1	gi|297787753	Chain A, Structure Of The Qb Replicase, An Rna-Dependent Rna Polymerase Consisting Of Viral And Host Proteins	686	74094	15	14	15	14	138	1	1	0	1171.68	1170.67	1	1170.65	0.0189	0	77.38	0.00086	K	VGEEVEIVGIK	E				b8dc51ee-6403-4e7e-b866-d949e02594f5
3	1	gi|297787753	Chain A, Structure Of The Qb Replicase, An Rna-Dependent Rna Polymerase Consisting Of Viral And Host Proteins	686	74094	15	14	15	14	160	1	1	1	1218.68	1217.67	1	1217.56	0.1171	0	87.55	9.2e-05	K	ALEGDAEWEAK	I				bee8244d-f660-4a4e-8e81-97932686a5a3
3	1	gi|297787753	Chain A, Structure Of The Qb Replicase, An Rna-Dependent Rna Polymerase Consisting Of Viral And Host Proteins	686	74094	15	14	15	14	189	1	1	1	1272.68	1271.68	1	1271.63	0.0507	0	91.78	7.3e-06	K	EHNAEVTGFIR	F				c7251747-5915-43b1-8fa9-5dad7fa2bd0b
3	1	gi|297787753	Chain A, Structure Of The Qb Replicase, An Rna-Dependent Rna Polymerase Consisting Of Viral And Host Proteins	686	74094	15	14	15	14	214	1	1	1	1303.87	1302.86	1	1302.78	0.0847	0	89.36	7.5e-06	K	TTLTAAITTVLAK	T				4083628b-b8c9-4e36-848b-a19c1de3f522
3	1	gi|297787753	Chain A, Structure Of The Qb Replicase, An Rna-Dependent Rna Polymerase Consisting Of Viral And Host Proteins	686	74094	15	14	15	14	305	1	1	1	1489.88	1488.88	1	1488.87	0.0062	0	110.23	3.1e-07	R	QVGVPYIIVFLNK	C				bb9437a5-4e33-4b65-9bfb-bba615e61e7d
3	1	gi|297787753	Chain A, Structure Of The Qb Replicase, An Rna-Dependent Rna Polymerase Consisting Of Viral And Host Proteins	686	74094	15	14	15	14	428	1	1	1	1743.03	1742.02	1	1741.87	0.1491	0	102.98	3e-07	R	VAALEGDVLGSYQHGAR	I				60c19bbc-1c47-42af-9852-9c430ffa0df4
3	1	gi|297787753	Chain A, Structure Of The Qb Replicase, An Rna-Dependent Rna Polymerase Consisting Of Viral And Host Proteins	686	74094	15	14	15	14	441	1	1	0	1768.85	1767.84	1	1767.78	0.0651	0	107.92	6.4e-07	R	HYAHVDCPGHADYVK	N				6ea0a644-94e7-4d16-9ded-d5203583b70a
3	1	gi|297787753	Chain A, Structure Of The Qb Replicase, An Rna-Dependent Rna Polymerase Consisting Of Viral And Host Proteins	686	74094	15	14	15	14	455	1	1	1	1795.91	1794.91	1	1794.95	-0.0426	0	152.78	2.1e-11	R	TKPHVNVGTIGHVDHGK	T				d9609857-e6a9-459d-bfad-335875896efc
3	1	gi|297787753	Chain A, Structure Of The Qb Replicase, An Rna-Dependent Rna Polymerase Consisting Of Viral And Host Proteins	686	74094	15	14	15	14	459	1	1	1	1804.01	1803	1	1802.88	0.1195	0	118.56	5e-08	R	GITINTSHVEYDTPTR	H				cc120e87-677c-44b6-8890-8a53db03be91
3	1	gi|297787753	Chain A, Structure Of The Qb Replicase, An Rna-Dependent Rna Polymerase Consisting Of Viral And Host Proteins	686	74094	15	14	15	14	473	1	1	1	1835.07	1834.07	1	1833.93	0.1361	0	115.52	8e-08	K	EYQVQLDIAMQSGKPK	E				44eeea9c-fc9b-43e0-8fa2-e307e0b65be3
3	1	gi|297787753	Chain A, Structure Of The Qb Replicase, An Rna-Dependent Rna Polymerase Consisting Of Viral And Host Proteins	686	74094	15	14	15	14	542	1	1	1	1954	1952.99	1	1952.96	0.0342	0	109.65	3.9e-07	K	FTGEVSLTGQPFVMEPSK	T				cf8839ba-4b0f-4b07-ac12-167c85115d7a
3	1	gi|297787753	Chain A, Structure Of The Qb Replicase, An Rna-Dependent Rna Polymerase Consisting Of Viral And Host Proteins	686	74094	15	14	15	14	546	1	1	1	1962.05	1961.04	1	1961.01	0.0301	0	136.91	7.2e-10	K	ILELAGFLDSYIPEPER	A				759c06f5-1619-4bc4-93c8-6bf215c5b5e7
3	1	gi|297787753	Chain A, Structure Of The Qb Replicase, An Rna-Dependent Rna Polymerase Consisting Of Viral And Host Proteins	686	74094	15	14	15	14	548	1	1	1	1965.1	1964.09	1	1963.95	0.1359	0	147.75	5.5e-11	R	ELLSQYDFPGDDTPIVR	G				22597b4a-f3ec-4a1e-9c76-5c75fb5b88a0
3	1	gi|297787753	Chain A, Structure Of The Qb Replicase, An Rna-Dependent Rna Polymerase Consisting Of Viral And Host Proteins	686	74094	15	14	15	14	611	1	1	1	2117.21	2116.2	1	2116.16	0.0428	0	150.37	2.6e-11	R	AIDKPFLLPIEDVFSISGR	G				a475f33c-2f6f-48ba-bbc3-6fd1bbbe1256
3	2	gi|297787753	Chain A, Structure Of The Qb Replicase, An Rna-Dependent Rna Polymerase Consisting Of Viral And Host Proteins	686	74094	15	14	15	14	863	1	1	1	2861.6	2860.59	1	2860.48	0.1157	0	152	2.9e-12	K	HIAMHVAASKPEFIKPEDVSAEVVEK	E				247a1113-bfc4-4b0a-b068-ae03e50d5f56
3	2	gi|15803853	elongation factor G [Escherichia coli O157:H7 str. EDL933]	239	77704	4	4	4	4	421	1	0	1	1732.92	1731.91	1	1731.84	0.0655	0	95.62	1.1e-05	K	YDEAPSNVAQAVIEAR	G				18e9ae37-aa11-474b-aac8-66cd90d79e2c
3	2	gi|15803853	elongation factor G [Escherichia coli O157:H7 str. EDL933]	239	77704	4	4	4	4	466	1	0	1	1820.94	1819.93	1	1819.92	0.0102	0	105.74	1e-06	R	EFNVEANVGKPQVAYR	E				79b85fe5-6080-4172-b63d-7611ebfe9eae
3	2	gi|15803853	elongation factor G [Escherichia coli O157:H7 str. EDL933]	239	77704	4	4	4	4	540	1	0	1	1951.87	1950.87	1	1950.91	-0.0457	0	126.55	2.2e-09	R	LHFGSYHDVDSSELAFK	L				177c2c79-ec1c-4562-85a8-55781538a5cf
3	3	gi|15803853	elongation factor G [Escherichia coli O157:H7 str. EDL933]	239	77704	4	4	4	4	599	1	0	1	2059.15	2058.14	1	2057.98	0.1658	0	138.65	2e-10	K	VEVETPEENTGDVIGDLSR	R				22f12ec1-5416-4884-b399-39a8b8db5396
3	3	gi|120553650	elongation factor Tu [Marinobacter aquaeolei VT8]	139	44034	2	2	2	2	379	1	0	1	1631.77	1630.76	1	1630.77	-0.0088	1	109.41	4.8e-07	R	AFDQIDNAPEERAR	G				7d47f433-ae34-48ac-b2d3-d4a1d46a923a
3	4	gi|120553650	elongation factor Tu [Marinobacter aquaeolei VT8]	139	44034	2	2	2	2	441	1	0	0	1768.85	1767.84	1	1767.78	0.0651	0	107.92	6.4e-07	R	HYAHVDCPGHADYVK	N				6ea0a644-94e7-4d16-9ded-d5203583b70a
3	4	gi|269122977	translation elongation factor Tu [Streptobacillus moniliformis DSM 12112]	115	43313	3	2	3	2	138	1	0	0	1171.68	1170.67	1	1170.65	0.0189	0	77.38	0.00086	K	VGEEVEIVGIK	D				b8dc51ee-6403-4e7e-b866-d949e02594f5
3	4	gi|269122977	translation elongation factor Tu [Streptobacillus moniliformis DSM 12112]	115	43313	3	2	3	2	441	1	0	0	1768.85	1767.84	1	1767.78	0.0651	0	107.92	6.4e-07	R	HYAHVDCPGHADYVK	N				6ea0a644-94e7-4d16-9ded-d5203583b70a
4	1	gi|269122977	translation elongation factor Tu [Streptobacillus moniliformis DSM 12112]	115	43313	3	2	3	2	638	1	0	1	2207.03	2206.03	1	2206.04	-0.0133	0	84.7	0.00011	K	VDMVEEEELLELVEMEVR	E	Oxidation (M)	0.001000000000000000.0		c3534c57-e746-4901-8d44-9456ac07e85b
4	1	gi|435476	cytokeratin 9 [Homo sapiens]	643	62320	4	4	4	4	476	1	1	1	1838.1	1837.09	1	1836.96	0.1368	0	144.63	2.1e-11	R	HGVQELEIELQSQLSK	K				b9d4d03e-2648-43a8-b720-cdb40b3950da
4	1	gi|435476	cytokeratin 9 [Homo sapiens]	643	62320	4	4	4	4	764	1	1	1	2510.17	2509.17	1	2509.12	0.0417	0	182.77	1.9e-15	K	EIETYHNLLEGGQEDFESSGAGK	I				ecc6aa7d-d56e-4ddf-a827-845b8a1304ef
4	1	gi|435476	cytokeratin 9 [Homo sapiens]	643	62320	4	4	4	4	824	1	1	1	2705.18	2704.18	1	2704.15	0.0236	0	354.08	8.6e-32	R	GGGGSFGYSYGGGSGGGFSASSLGGGFGGGSR	G				dec8815f-a8ce-4696-8a81-b8394de2e531
5	1	gi|435476	cytokeratin 9 [Homo sapiens]	643	62320	4	4	4	4	897	1	1	1	3264.49	3263.48	1	3263.51	-0.0223	0	169.32	1.2e-14	K	DIENQYETQITQIEHEVSSSGQEVQSSAK	E				47b9e7f5-1a2c-44e0-a960-e46d92317675
5	1	gi|5822495	Chain A, A Detailed Description Of The Structure Of Succinyl-Coa Synthetase From Escherichia Coli	346	29887	4	4	4	4	172	1	1	1	1244.7	1243.69	1	1243.67	0.0259	0	108.11	7.8e-07	K	DSILEAIDAGIK	L				e073044a-d30b-4dda-afea-ae39145e7bee
5	1	gi|5822495	Chain A, A Detailed Description Of The Structure Of Succinyl-Coa Synthetase From Escherichia Coli	346	29887	4	4	4	4	344	1	1	1	1568.98	1567.97	1	1567.85	0.1272	0	100.9	1.3e-06	K	GGTTHLGLPVFNTVR	E				f66112d8-58c0-4c13-9fa4-69f3bfd827eb
5	1	gi|5822495	Chain A, A Detailed Description Of The Structure Of Succinyl-Coa Synthetase From Escherichia Coli	346	29887	4	4	4	4	503	1	1	1	1866.19	1865.18	1	1865.04	0.1407	0	154.82	2.5e-12	K	EHVTKPVVGYIAGVTAPK	G				44ff7395-f1cd-42ae-ab7a-f34eb8de90c4
6	1	gi|5822495	Chain A, A Detailed Description Of The Structure Of Succinyl-Coa Synthetase From Escherichia Coli	346	29887	4	4	4	4	784	1	1	1	2587.31	2586.3	1	2586.22	0.0857	0	203.09	2.1e-17	K	VICQGFTGSQGTFHSEQAIAYGTK	M				f0c58c4e-de0a-4ea1-8528-cd026a64757f
6	1	gi|15833452	FKBP-type peptidylprolyl isomerase [Escherichia coli O157:H7 str. Sakai]	326	28894	5	5	5	5	262	1	1	1	1384.84	1383.84	1	1383.74	0.0976	0	86.29	6.5e-05	R	LDGVIPGWTEGLK	N				eb7bdf2e-fcce-4d8c-87db-4fa1d475df00
6	1	gi|15833452	FKBP-type peptidylprolyl isomerase [Escherichia coli O157:H7 str. Sakai]	326	28894	5	5	5	5	482	1	1	1	1847.06	1846.05	1	1845.95	0.103	1	152.22	1.9e-11	K	LDKDQLIAGVQDAFADK	S				a0736e70-8e5b-459e-b7ae-ca0bf8dd0e4a
6	1	gi|15833452	FKBP-type peptidylprolyl isomerase [Escherichia coli O157:H7 str. Sakai]	326	28894	5	5	5	5	506	1	1	1	1878.05	1877.04	1	1876.92	0.1241	0	159.41	4.1e-12	K	LSDQEIEQTLQAFEAR	V				f2c293ad-9460-4284-b7a7-87268a59ea9b
6	1	gi|15833452	FKBP-type peptidylprolyl isomerase [Escherichia coli O157:H7 str. Sakai]	326	28894	5	5	5	5	586	1	1	1	2021	2019.99	1	2020.05	-0.0579	1	129.4	4.1e-09	K	TSSTGLVYQVVEAGKGEAPK	D				56fc7e16-aba7-402e-9e5a-399483000288
7	1	gi|15833452	FKBP-type peptidylprolyl isomerase [Escherichia coli O157:H7 str. Sakai]	326	28894	5	5	5	5	812	1	1	1	2673.65	2672.64	1	2672.48	0.1619	0	96.17	1.8e-07	K	AGVPGIPPNSTLVFDVELLDVKPAPK	A				8d7e694b-f7a9-47e0-bab3-19548a51f073
7	1	gi|40885	unnamed protein product [Escherichia coli K-12]	299	48193	3	3	3	3	628	1	1	1	2178.15	2177.14	1	2176.97	0.1676	0	120.11	3.2e-08	K	DGYTFVSHQQEVGTGYFDK	V				2f3584af-6ecd-46fd-a252-8612cd956583
7	1	gi|40885	unnamed protein product [Escherichia coli K-12]	299	48193	3	3	3	3	828	1	1	1	2711.49	2710.48	1	2710.29	0.1873	0	161.89	1.5e-12	R	GLAYAPYADLVWCETSTPDLELAR	R				71b51acd-3d85-4005-82bf-110ae308d007
8	1	gi|40885	unnamed protein product [Escherichia coli K-12]	299	48193	3	3	3	3	844	1	1	1	2777.31	2776.3	1	2776.17	0.1369	0	168.24	1.7e-13	R	TDADAADLITSDCDPYDSEFITGER	T				bd946cc5-13c7-456b-8a20-5dce476055ac
8	1	gi|136429	RecName: Full=Trypsin; Flags: Precursor	288	25078	2	2	1	1	639	1	1	1	2211.04	2210.04	1	2210.1	-0.0595	0	176.57	6.9e-14	R	LGEHNIDVLEGNEQFINAAK	I				0fde9660-129a-4a0a-95bb-69f5046590ef
9	1	gi|136429	RecName: Full=Trypsin; Flags: Precursor	288	25078	2	2	1	1	640	1	1	1	2211.05	2210.04	1	2210.1	-0.0589	0	188.54	4.4e-15	R	LGEHNIDVLEGNEQFINAAK	I				c5f363ec-3187-4ef0-8eb6-f94ba5c1a97b
9	1	gi|2392283	Chain D, Crystal Structure Of The Nucleotide Exchange Factor Grpe Bound To The Atpase Domain Of The Molecular Chaperone Dnak	285	41557	3	3	2	2	631	1	1	1	2190.11	2189.1	1	2189.12	-0.0211	0	136.79	6.8e-10	R	TTPSIIAYTQDGETLVGQPAK	R				cb94b8a8-e4c3-40a7-9013-36f62dd1451a
9	1	gi|2392283	Chain D, Crystal Structure Of The Nucleotide Exchange Factor Grpe Bound To The Atpase Domain Of The Molecular Chaperone Dnak	285	41557	3	3	2	2	865	1	1	1	2869.55	2868.54	1	2868.38	0.1597	0	166.22	5.3e-13	K	TAEDYLGEPVTEAVITVPAYFNDAQR	Q				972bd8b9-f966-4061-b953-96a222c1b642
10	1	gi|2392283	Chain D, Crystal Structure Of The Nucleotide Exchange Factor Grpe Bound To The Atpase Domain Of The Molecular Chaperone Dnak	285	41557	3	3	2	2	866	1	1	1	2869.57	2868.56	1	2868.38	0.1765	0	135.73	5.8e-10	K	TAEDYLGEPVTEAVITVPAYFNDAQR	Q				1b415b52-5db0-4294-83fd-48a5467f8eee
10	1	gi|2914323	Chain A, X-Ray Structure Of Escherichia Coli Enoyl Reductase With Bound Nad And Benzo-Diazaborine	261	27943	2	2	2	2	302	1	1	1	1485.72	1484.72	1	1484.68	0.038	0	85.03	3e-05	R	EGAELAFTYQNDK	L				a770856d-c60f-4122-af44-89efcb8849b1
11	1	gi|2914323	Chain A, X-Ray Structure Of Escherichia Coli Enoyl Reductase With Bound Nad And Benzo-Diazaborine	261	27943	2	2	2	2	849	1	1	1	2797.37	2796.37	1	2796.31	0.051	0	250.15	2.4e-21	K	FDGFVHSIGFAPGDQLDGDYVNAVTR	E				c679fe60-2450-49f4-a960-a5ce24f3a359
11	1	gi|940498	3-deoxy-D-manno-octulosonic acid 8-phosphate synthetase [Escherichia coli]	245	31007	2	2	2	2	576	1	1	1	2000.01	1999	1	1998.99	0.0063	0	132.13	2.2e-09	K	VSGNSPVIFDVTHALQCR	D				af61d245-f76d-4bf3-803b-e09942380ec1
12	1	gi|940498	3-deoxy-D-manno-octulosonic acid 8-phosphate synthetase [Escherichia coli]	245	31007	2	2	2	2	893	1	1	1	3141.75	3140.75	1	3140.69	0.0605	0	189.22	2.1e-15	K	IITDVHEPSQAQPVADVVDVIQLPAFLAR	Q				f835e6d3-4c7e-41ba-a285-d760870fa96a
12	1	gi|7331218	keratin 1 [Homo sapiens]	241	66149	3	3	2	2	414	1	1	1	1716.81	1715.8	1	1715.84	-0.0422	0	104.22	1.5e-06	K	QISNLQQSISDAEQR	G				32b9bb28-3851-4496-8f99-00653e35757d
12	1	gi|7331218	keratin 1 [Homo sapiens]	241	66149	3	3	2	2	415	1	1	1	1716.86	1715.85	1	1715.84	0.0066	0	100.84	3.5e-06	K	QISNLQQSISDAEQR	G				066ec91e-db32-4256-8afa-ac246c10e8aa
13	1	gi|7331218	keratin 1 [Homo sapiens]	241	66149	3	3	2	2	902	1	1	1	3312.43	3311.42	1	3311.3	0.1213	0	182.78	4.4e-16	R	GSYGSGGSSYGSGGGSYGSGGGGGGHGSYGSGSSSGGYR	G				f8ffa13b-b94c-4e7d-bf6d-b06613d767c2
13	1	gi|1941982	Chain A, Structure Of Transaldolase B	236	35237	2	2	2	2	727	1	1	1	2407.12	2406.11	1	2406.13	-0.0121	0	136.71	1.2e-11	K	EYAPAEDPGVVSVSEIYQYYK	E				396a2b3f-5dd3-47ff-9f9b-5db4b09d6725
14	1	gi|1941982	Chain A, Structure Of Transaldolase B	236	35237	2	2	2	2	829	1	1	1	2716.61	2715.6	1	2715.39	0.2122	0	165.94	3.8e-13	K	LYQPQDATTNPSLILNAAQIPEYR	K				7ab152e3-48a7-47e4-acb7-17f85311e965
14	1	gi|237823432	Chain A, Crystal Structure Of A Galactofuranose Binding Protein	214	33421	3	3	3	3	205	1	1	0	1287.76	1286.75	1	1286.69	0.0652	0	92.85	2.2e-05	K	DAEIPVFLLDR	S				a176e7c7-96a2-4bbe-85f6-fc76b7b56ce7
14	1	gi|237823432	Chain A, Crystal Structure Of A Galactofuranose Binding Protein	214	33421	3	3	3	3	368	1	1	0	1605.97	1604.96	1	1604.83	0.1284	0	102.6	1.5e-06	K	DILTGSIDGVPDIYK	A				7def83f0-df87-420e-a594-3645111f6c61
14	2	gi|237823432	Chain A, Crystal Structure Of A Galactofuranose Binding Protein	214	33421	3	3	3	3	444	1	1	1	1777.94	1776.94	1	1776.88	0.0558	0	166.1	4.2e-14	-	APLTVGFSQVGSESGWR	A				074bec83-c99b-44c9-a4dc-2b6b3efc354a
14	2	gi|157147799	hypothetical protein CKO_03603 [Citrobacter koseri ATCC BAA-895]	151	34423	3	3	3	3	205	1	0	0	1287.76	1286.75	1	1286.69	0.0652	0	92.85	2.2e-05	K	DAEIPVFLLDR	S				a176e7c7-96a2-4bbe-85f6-fc76b7b56ce7
14	2	gi|157147799	hypothetical protein CKO_03603 [Citrobacter koseri ATCC BAA-895]	151	34423	3	3	3	3	368	1	0	0	1605.97	1604.96	1	1604.83	0.1284	0	102.6	1.5e-06	K	DILTGSIDGVPDIYK	A				7def83f0-df87-420e-a594-3645111f6c61
15	1	gi|157147799	hypothetical protein CKO_03603 [Citrobacter koseri ATCC BAA-895]	151	34423	3	3	3	3	768	1	0	1	2513.46	2512.45	1	2512.26	0.1922	0	108.51	2e-07	K	EVDGKPCNVVELQGTVGASVAIDR	K				2dfa6c6f-184c-4beb-a63c-84c2737b0963
15	1	gi|1359437	acetate kinase [Escherichia coli]	181	43488	3	3	3	3	426	1	1	1	1737.97	1736.96	1	1736.92	0.0443	0	85.23	0.00011	K	YTSSVVIDESVIQGIK	D				0d3a687a-892b-4c26-be40-b73a5950f39e
15	1	gi|1359437	acetate kinase [Escherichia coli]	181	43488	3	3	3	3	504	1	1	1	1867	1866	1	1865.87	0.1266	0	100.49	3.3e-06	R	YGAHGTSHFYVTQEAAK	M				4f758d3e-e8cf-479a-abcc-27680d814ec8
16	1	gi|1359437	acetate kinase [Escherichia coli]	181	43488	3	3	3	3	689	1	1	1	2314.23	2313.22	1	2313.21	0.0106	0	144.32	1.1e-11	K	DAASFAPLHNPAHLIGIEEALK	S				315dc12a-1afd-4ea7-a9bf-57b518603bc3
17	1	gi|15803460	phosphoglycerate kinase [Escherichia coli O157:H7 str. EDL933]	165	41276	1	1	1	1	754	1	1	1	2465.29	2464.29	1	2464.31	-0.0202	0	165.46	8.1e-13	K	IADQLIVGGGIANTFIAAQGHDVGK	S				febf5aca-d235-45f0-88ff-cdec0bd8ac0f
17	1	gi|251785228	hypothetical protein B21_01737 [Escherichia coli BL21(DE3)]	165	32935	3	3	3	3	449	1	1	1	1782.06	1781.06	1	1781.05	0.0117	0	110.54	2.1e-07	K	IFALPVIEQISPVLSR	R				546bfca2-eb45-48ae-a549-8bca9946b84b
17	1	gi|251785228	hypothetical protein B21_01737 [Escherichia coli BL21(DE3)]	165	32935	3	3	3	3	498	1	1	1	1861.13	1860.13	1	1860.04	0.0913	1	84.44	6.7e-05	R	KLDELDLIVVDHPQVK	A				9b44dbe5-8337-48f8-9276-c6577f610897
18	1	gi|251785228	hypothetical protein B21_01737 [Escherichia coli BL21(DE3)]	165	32935	3	3	3	3	620	1	1	1	2148.18	2147.17	1	2147.03	0.138	0	117.76	9e-09	R	VYLNPQDCSVINDEVLNR	I				d6ea268a-a761-438c-b913-a088f4b2eaa4
18	1	gi|41591	unnamed protein product [Escherichia coli]	163	10677	2	2	2	2	362	1	1	1	1598.99	1597.99	1	1597.85	0.1397	0	112.69	1e-07	K	ITFIDGDEGILLHR	G				bc18b36e-602c-4011-89fb-95914a3815ea
19	1	gi|41591	unnamed protein product [Escherichia coli]	163	10677	2	2	2	2	533	1	1	1	1937.95	1936.94	1	1936.85	0.0903	0	123.13	3.6e-09	K	GVFTFDPGFTSTASCESK	I				0da42b83-bd93-46bc-87ab-777aa1920913
19	1	gi|28317	unnamed protein product [Homo sapiens]	157	59720	2	2	2	2	410	1	1	1	1707.86	1706.86	1	1706.76	0.0922	0	98.83	5.5e-06	K	GSLGGGFSSGGFSGGSFSR	G				41b63741-ce37-4b4f-a10f-05d5c68b044e
20	1	gi|28317	unnamed protein product [Homo sapiens]	157	59720	2	2	2	2	706	1	1	1	2367.38	2366.38	1	2366.26	0.1214	0	135.47	5.7e-10	K	NQILNLTTDNANILLQIDNAR	L				4d57edcc-f836-4fa7-bcd5-b63eee515e0d
20	1	gi|145708	dihydrodipicolinate synthetase (dapA) [Escherichia coli]	155	31637	3	3	3	3	590	1	1	1	2037.23	2036.23	1	2036.07	0.1562	0	86.38	3.4e-07	K	AIAEHTDLPQILYNVPSR	T				07e95a72-a989-46e1-9e1e-99a5db2f0451
20	1	gi|145708	dihydrodipicolinate synthetase (dapA) [Escherichia coli]	155	31637	3	3	3	3	595	1	1	1	2054.2	2053.19	1	2053.12	0.0765	0	108.07	5e-08	R	IPVIAGTGANATAEAISLTQR	F				bdb06882-9256-48e5-84b2-34d4804805cb
21	1	gi|145708	dihydrodipicolinate synthetase (dapA) [Escherichia coli]	155	31637	3	3	3	3	917	1	1	1	3390.67	3389.66	1	3389.61	0.0511	0	92.12	1.1e-05	R	FNDSGIVGCLTVTPYYNRPSQEGLYQHFK	A				4979f9de-6a65-463b-9ff0-244fd1333cca
22	1	gi|15802710	esterase [Escherichia coli O157:H7 str. EDL933]	154	31650	1	1	1	1	895	1	1	1	3197.47	3196.47	1	3196.46	0.0035	0	153.81	1.4e-12	K	VANDDGYDLGQGAGFYLNATQPPWATHYR	M				9dc7f7db-62fc-4394-a00c-29377f9bc67f
23	1	gi|156933019	thiosulfate transporter subunit [Cronobacter sakazakii ATCC BAA-894]	151	37571	1	1	1	1	598	1	1	1	2058.21	2057.2	1	2057.04	0.1561	0	151.37	2e-12	K	ADVVTYNQVTDVQILHDK	G				9a22b95c-e2f0-4009-a88e-9cfd41e5f863
24	1	gi|496404891	hypothetical protein [Brenneria sp. EniD312]	132	32076	1	1	1	1	881	1	1	1	2972.46	2971.45	1	2971.47	-0.0185	0	132.23	1.3e-09	R	AIPTVYLFQDGQPVDGFQGPQPEEAIR	D				5f867d75-0e54-437c-898b-21cee5fbfca1
24	1	gi|216665	SseA [Escherichia coli]	124	26250	2	2	2	2	261	1	1	1	1384.77	1383.76	1	1383.67	0.0976	0	114.02	1.7e-07	K	TTDELDAIFFGR	G				f2152ca9-48df-4801-8d4b-354bf286a68a
25	1	gi|216665	SseA [Escherichia coli]	124	26250	2	2	2	2	273	1	1	1	1410.73	1409.72	1	1409.64	0.0838	0	88.6	6.3e-05	K	LYDGAWSEWGAR	A				4ea33239-c501-4bbc-9d3a-31e518a09dd9
25	1	gi|300715397	elongation factor Ts [Erwinia billingiae Eb661]	118	30364	2	2	1	1	495	1	1	1	1861.02	1860.01	1	1859.89	0.1203	0	111.51	2.6e-07	K	ALTEADGDIELAIENMR	K				e045476c-92a1-45f0-87c2-f9eb6d84d256
26	1	gi|300715397	elongation factor Ts [Erwinia billingiae Eb661]	118	30364	2	2	1	1	505	1	1	1	1877.08	1876.07	1	1875.89	0.1859	0	77.43	2.4e-05	K	ALTEADGDIELAIENMR	K	Oxidation (M)	0.00000000000000010.0		4e8c148b-fcf2-4748-b75c-3344efaf1293
27	1	gi|6729727	Chain A, Ompf Porin Mutant D74a	117	37018	1	1	1	1	483	1	1	1	1848	1846.99	1	1846.85	0.1441	0	117.29	7e-08	K	YDANNIYLAANYGETR	N				676b228d-38ca-41f0-ad69-1be68f0abe39
27	1	gi|375262052	NADH dehydrogenase subunit G [Klebsiella oxytoca KCTC 1686]	101	100228	2	2	2	2	513	1	1	1	1896.02	1895.01	1	1894.92	0.093	0	95.31	1.1e-05	R	IAPYYHLFGSDELSQR	A				6b88a9fc-f5d7-4551-a672-53bfd5abe93e
28	1	gi|375262052	NADH dehydrogenase subunit G [Klebsiella oxytoca KCTC 1686]	101	100228	2	2	2	2	626	1	1	1	2171.05	2170.04	1	2170.04	0.0011	0	78.58	4.3e-05	R	SQVPFAWAPGWNSPQAWNK	F				3c647b93-47ba-4201-87a7-b9f03d432c8e
29	1	gi|147113	phosphoenolpyruvate carboxykinase [Escherichia coli]	101	51506	1	1	1	1	497	1	1	1	1861.08	1860.07	1	1860.01	0.059	0	101.23	2.3e-06	R	GVLTNLGAVAVDTGIFTGR	S				08178cd1-3662-4036-b7e6-9a3b3816998e
30	1	gi|15800229	thioredoxin-like protein [Escherichia coli O157:H7 str. EDL933]	100	33150	1	1	1	1	330	1	1	1	1540.86	1539.85	1	1539.8	0.0484	0	99.79	4.2e-06	R	NEEALELLFGHLR	K				e691ccd4-842e-4b99-861b-8a740c4092d3
31	1	gi|181402	epidermal cytokeratin 2 [Homo sapiens]	97	66110	1	1	1	1	860	1	1	1	2831.4	2830.39	1	2830.19	0.2078	0	97.27	4.3e-06	R	GGGFGGGSGFGGGSGFGGGSGFSGGGFGGGGFGGGR	F				2b87f4cf-a078-42cb-9d84-00d59b6ba4ff
32	1	gi|148277	exonuclease III [Escherichia coli]	94	31093	1	1	1	1	845	1	1	1	2778.55	2777.54	1	2777.36	0.1802	0	94.34	2.5e-07	R	IDLLLASQPLAECCVETGIDYEIR	S				01268a6f-9f4c-4f4b-9060-d4e3b79f11b7
33	1	gi|15799867	acetyl-CoA carboxylase carboxyltransferase subunit alpha [Escherichia coli O157:H7 str. EDL933]	94	35333	1	1	1	1	313	1	1	1	1497.8	1496.79	1	1496.68	0.1163	0	93.9	7.6e-06	R	LAFDEFDELAGDR	A				8de532d0-c1e2-49aa-bddd-ace8440da2f9
34	1	gi|344297218	PREDICTED: cationic trypsin-3-like [Loxodonta africana]	93	26319	1	1	1	1	660	1	1	1	2239.19	2238.18	1	2238.16	0.0192	1	93.27	6.7e-06	R	LGEHNIEVLEGNEQFIKAAK	I				351300b5-3f8a-4d4a-bf16-c0d8e7b2a203
35	1	gi|216645	ORF267 [Escherichia coli W3110]	93	29440	1	1	1	1	781	1	1	1	2559.33	2558.32	1	2558.26	0.0603	0	92.83	1.4e-05	R	AIDTAQIYDNEAAVGQAIAESGVPR	H				a0f95c11-54bf-4dc3-aad3-04aebc0f9d73
36	1	gi|129134	RecName: Full=Outer membrane protein A; AltName: Full=Outer membrane protein II	89	25762	1	1	1	1	391	1	1	1	1654.95	1653.95	1	1653.83	0.1203	0	88.65	4.4e-05	K	LGYPITDDLDIYTR	L				180f91cc-2a25-443f-a18b-8c3b6709b9ae
37	1	gi|15803475	agmatinase [Escherichia coli O157:H7 str. EDL933]	88	33764	1	1	1	1	508	1	1	1	1883.93	1882.92	1	1882.89	0.0343	0	88.05	6.9e-06	R	LNVVDCGDLVYAFGDAR	E				9d160cfa-2c1a-455b-9468-42ae6f615d90
38	1	gi|15800571	hypothetical protein Z1041 [Escherichia coli O157:H7 str. EDL933]	85	33418	1	1	1	1	661	1	1	1	2241.14	2240.14	1	2240.15	-0.0179	0	84.76	0.00011	K	SVQTVTGQPDVDQVVLDEAIK	N				07831717-81ab-4e7d-a5b6-1a38065b8803
39	1	gi|189168369	malate dehydrogenase [Vibrio sp. FAL133]	82	15376	1	1	1	1	735	1	1	1	2418.21	2417.2	1	2417.21	-0.0078	0	81.97	3.9e-05	K	GYAGEDPTSALEGADVVLISAGVAR	K				9c604690-8ae3-4e5a-b891-aab5207ce85d
40	1	gi|146008	protein required for folC expression [Escherichia coli]	80	33669	1	1	1	1	702	1	1	1	2365.18	2364.17	1	2364.08	0.0873	0	79.59	3.7e-05	R	AVEQALEDNCPLICFSASGGAR	M				985b5044-5adf-4e4c-a292-735d85bed19c
41	1	gi|532115101	PREDICTED: cationic trypsin-3-like [Ictidomys tridecemlineatus]	80	27071	1	1	1	1	641	1	1	1	2212.13	2211.13	1	2211.08	0.0452	0	79.52	0.00013	R	LGEHNINVIEGDEQFIDAAK	I				2f25ee16-61d6-4011-a405-5b05e3fc89d7
		gi|148177	branched-chain amino-acid aminotransferase [Escherichia coli str. K-12 substr. MG1655]	78	34328	1	1	1	1	561	1	1	1	1976.21	1975.21	1	1975.04	0.1658	0	77.52	0.00026	K	DGVLFTPPFTSSALPGITR	D				9b539cdc-86e9-4d9c-b3f2-ede00a750def

## Sheet: Table S3
Supporting table for Figure 3C: GFP, SpGFP Immunoprecipitation
Sl no	Sample details (Band ID)	Accession no - Description [Source]		Unique peptides (sequences)	Seq coverage (%)	Theoretical molecular weight (kDa)	observed mass	Theoretical mass	Peptide sequences + modification	MOWSE score
		NCBInr DB	Protein sequence DB [In house]	NCBInr / Protein seq DB
1	1	gi|158939741 - mGFP5-ER [Binary vector pCLEAN-G147]	GFP [In house]	15 / 15*	39 / 43*	27.533	1503.74	1502.73	K.FSVSGEGEGDATYGK.L	144
							826.385	825.378	K.FICTTGK.L
							790.33	789.322	R.YPDHMK.R
							946.518	945.51	R.YPDHMKR.H
							849.478	848.471	K.RHDFFK.S
							1266.66	1265.66	K.SAMPEGYVQER.T
							1282.64	1281.64	K.SAMPEGYVQER.T + Oxidation (M)
							1347.72	1346.71	R.TIFFKDDGNYK.T
							1477.86	1476.85	R.AEVKFEGDTLVNR.I
							1050.59	1049.58	K.FEGDTLVNR.I
							1533.92	1532.91	K.FEGDTLVNRIELK.G
							1542.85	1541.85	K.GIDFKEDGNILGHK.L
							1974.06	1973.05	K.LEYNYNSHNVYIMADK.Q
							2230.22	2229.21	K.LEYNYNSHNVYIMADKQK.N
							2246.22	2245.21	K.LEYNYNSHNVYIMADKQK.N + Oxidation (M)
2	2	gi|446963362 - cell division protein FtsY [Escherichia coli]		13	75	54.607	3175.37	3174.36	K.EQTPEKETEVQNEQPVVEEIVPAQEPAK.A	75
							3986.79	3985.78	K.ASEQAVEEQPQAHTEAEAETFAADVVEVTEQVAESEK.A
							2813.35	2812.34	K.AQPEAEVVAQPEPVVEETPEPVAIER.E
							1568.8	1567.79	K.TKENLGSGFISLFR.G
							1339.67	1338.66	K.ENLGSGFISLFR.G
							2028.96	2027.95	R.QFEQQGKSVMLAAGDTFR.A + Oxidation (M)
							1167.55	1166.54	K.SVMLAAGDTFR.A
							1455.74	1454.73	R.AAAVEQLQVWGQR.N
							1257.65	1256.64	R.NIDVLIADTAGR.L
							1675.88	1674.87	K.GGVIFSVADQFGIPIR.Y**
							793.388	792.38	R.YIGVGER.I
							1017.53	1016.52	R.IEDLRPFK.A
							1511.68	1510.67	K.ADDFIEALFARED.-
3	3	gi|158939741 - mGFP5-ER [Binary vector pCLEAN-G147]	SP-GFP [In house]	16 / 16 *	47	32.952	1503.78	1502.77	K.FSVSGEGEGDATYGK.L	123
							946.498	945.491	R.YPDHMKR.H
							962.502	961.495	R.YPDHMKR.H + Oxidation (M)
							849.485	848.477	K.RHDFFK.S
							1266.66	1265.65	K.SAMPEGYVQER.T
							1282.65	1281.64	K.SAMPEGYVQER.T + Oxidation (M)
							1347.74	1346.73	R.TIFFKDDGNYK.T
							1477.85	1476.84	R.AEVKFEGDTLVNR.I
							1050.57	1049.56	K.FEGDTLVNR.I
							1533.91	1532.9	K.FEGDTLVNRIELK.G
							1542.86	1541.85	K.GIDFKEDGNILGHK.L
							1974.01	1973	K.LEYNYNSHNVYIMADK.Q
							1990.01	1989.01	K.LEYNYNSHNVYIMADK.Q + Oxidation (M)
							2246.24	2245.23	K.LEYNYNSHNVYIMADKQK.N + Oxidation (M)
							3100.72	3099.71	R.DHMVLLEFVTAAGITHGMDELYKHDEL.- + Oxidation (M)
							3116.66	3115.65	R.DHMVLLEFVTAAGITHGMDELYKHDEL.- + 2 Oxidation (M)
4	4	gi|158939741 - mGFP5-ER [Binary vector pCLEAN-G147]	GFP [In house]	20 / 20 *	62	27.533	2749.48	2748.47	M.ASKGEELFTGVVPILVELDGDVNGYK.F*	119
							1503.73	1502.73	K.FSVSGEGEGDATYGK.L
							946.495	945.488	R.YPDHMKR.H
							962.497	961.49	R.YPDHMKR.H
							849.473	848.466	K.RHDFFK.S
							693.299	692.292	R.HDFFK.S
							1266.64	1265.63	K.SAMPEGYVQER.T
							1282.64	1281.63	K.SAMPEGYVQER.T
							1347.71	1346.71	R.TIFFKDDGNYK.T
							1477.82	1476.81	R.AEVKFEGDTLVNR.I
							1050.56	1049.56	K.FEGDTLVNR.I
							1533.89	1532.88	K.FEGDTLVNRIELK.G
							1542.85	1541.85	K.GIDFKEDGNILGHK.L
							1974	1972.99	K.LEYNYNSHNVYIMADK.Q
							1989.98	1988.98	K.LEYNYNSHNVYIMADK.Q
							2230.22	2229.21	K.LEYNYNSHNVYIMADKQK.N
							2246.16	2245.15	K.LEYNYNSHNVYIMADKQK.N
							3084.79	3083.78	R.DHMVLLEFVTAAGITHGMDELYKHDEL.-
							3100.63	3099.62	R.DHMVLLEFVTAAGITHGMDELYKHDEL.-
							3116.61	3115.61	R.DHMVLLEFVTAAGITHGMDELYKHDEL.-
	* - denotes the Protein identification output from In house Protein sequence Database
	** - peptide corresponding to FtsY protein has been confirmed through MS/MS based sequencing - for PMF and MS/MS spectrum please see figs. S2B

## Sheet: Table S4
Supporting table for Supplementary Figure S6 A-B: GFP, SpGFP - 2D PAGE MS analysis
Sl no	Sample details	Accession no - Description [Source]	Unique peptides (sequences)	Seq coverage (%)	Theoretical molecular weight (kDa)	Theoretical pI	observed mass	Theoretical mass	Peptide sequences + modification	MOWSE score
1	Inset A-1	gi|13161001 - lacZ-GFP fusion protein [Cloning vector pFH2191]	11	46	29.514	6.1	3116.58	3115.57	R.VPHMSKGEELFTGVVPILVELDGDVNGHK.F	95
							1959.11	1958.1	K.FSVSGEGEGDATYGKLTLK.F
							962.512	961.505	R.YPDHMKR.H + Oxidation (M)
							849.485	848.477	K.RHDFFK.S
							1941.02	1940.01	R.HDFFKSAMPEGYVQER.T
							1266.64	1265.64	K.SAMPEGYVQER.T
							1282.65	1281.64	K.SAMPEGYVQER.T + Oxidation (M)
							1347.73	1346.73	R.TIFFKDDGNYK.T
							1477.83	1476.83	R.AEVKFEGDTLVNR.I
							1533.89	1532.89	K.FEGDTLVNRIELK.G
							2612.28	2611.28	R.DHMVLLEFVTAAGITHGMHELYK.-
2	Inset B-1	gi|1848289 - enhanced green fluorescent protein/OT-1 antigen/OLLAS-tag fusion protein [synthetic construct]	13	50	29.82	5.65	806.358	805.351	R.YPDHMK.R +Oxidation (M)	88
							849.543	848.536	K.RHDFFK.S
							946.539	945.532	R.YPDHMKR.H
							962.557	961.55	R.YPDHMKR.H +Oxidation (M)
							1050.63	1049.62	K.FEGDTLVNR.I
							1266.69	1265.68	K.SAMPEGYVQER.T
							1282.7	1281.7	K.SAMPEGYVQER.T +Oxidation (M)
							1347.79	1346.78	R.TIFFKDDGNYK.T
							1477.9	1476.89	R.AEVKFEGDTLVNR.I
							1533.97	1532.96	K.FEGDTLVNRIELK.G
							1542.9	1541.89	K.GIDFKEDGNILGHK.L
							3116.76	3115.75	R.DHMVLLEFVTAAGITHGMDELYKHDEL.- +2 Oxidation (M)
							4442.78	4441.77	R.HNIEDGGVQLADHYQQNTPIGDGPVLLPDNHYLSTQSALSK.D
3	Inset B-2	gi|13161001 - lacZ-GFP fusion protein [Cloning vector pFH2191]	11	51	29.514	6.1	817.389	816.382	R.STLEDPR.V	90
							3116.74	3115.74	R.VPHMSKGEELFTGVVPILVELDGDVNGHK.F
							1503.81	1502.8	K.FSVSGEGEGDATYGK.L
							790.311	789.304	R.YPDHMK.R
							1266.7	1265.69	K.SAMPEGYVQER.T
							1347.79	1346.78	R.TIFFKDDGNYK.T
							1477.91	1476.9	R.AEVKFEGDTLVNR.I
							1050.62	1049.61	K.FEGDTLVNR.I
							1533.97	1532.97	K.FEGDTLVNRIELK.G
							1542.94	1541.93	K.GIDFKEDGNILGHK.L
							2612.41	2611.4	R.DHMVLLEFVTAAGITHGMHELYK.-

## Sheet: Table S5
Supporting table for Figure 2D and Supplementary Figure S8
Sl no	Sample details	Accession no - Description [Source]		Unique peptides (sequences)	Seq coverage (%)	emPAI	MOWSE score	observed mass	Theoretical mass	Peptide sequences + modification	Ion score
		NCBInr DB	Protein Sequence DB
1	SpGFP 01 GluC digested - middle band	gi|155663 - green-fluorescent protein [Aequorea victoria]	SpGFP 297 [In house]	3	7	0.42	123	2447.11	2446.19	GGASSVFAQGNGQAGPPKGGIFKEGE**	129	Signal Peptide region
								1016.59	1015.5298	E.GDTLVNRIE.L*	29
								1364.65	1363.6078	E.FVTAAGITHGMDE.L + Oxidation (M)*	69
2	SpGFP 02 GluC digested	gi|155663 - green-fluorescent protein [Aequorea victoria]	SpGFP 247 [In house]	3	13	0.67	169	1205.66	1204.57	NVQPFASKGEE.L ***	25
								1016.55	1015.53	E.GDTLVNRIE.L	49
								1364.67	1363.61	E.FVTAAGITHGMDE.L	93
3	SpGFP 01 Trypsin digested - middle band	gi|134260421 - GFPNeo fusion protein [Cloning vector pEFBOS-IRESGFPNeo]	SpGFP 297 [In house]	5	18	1.09	295	2463.29	2462.26	K.GEELFTGVVPILVELDGDVNGYK.F	102
								1503.7	1502.65	K.FSVSGEGEGDATYGK.L	127
								1415.65	1414.62	K.LEYNYNSHNVY.I	51
								1974.01	1972.9	K.LEYNYNSHNVYIMADK.Q	61
								1990	1988.89	K.LEYNYNSHNVYIMADK.Q + Oxidation (M)	50
								2463.33	2462.26	K.GEELFTGVVPILVELDGDVNGYK.F	106
4	SpGFP 02 Trypsin digested - lower band	gi|134260421 - GFPNeo fusion protein [Cloning vector pEFBOS-IRESGFPNeo]	SpGFP 297 [In house]	5	21	1.42	253	1503.74	1502.65	K.FSVSGEGEGDATYGK.L	92
								1050.55	1049.51	K.FEGDTLVNR.I	42
								1415.69	1414.62	K.LEYNYNSHNVY.I	70
								1973.93	1972.9	K.LEYNYNSHNVYIMADK.Q	39
								1989.93	1988.89	K.LEYNYNSHNVYIMADK.Q+Oxidation (M)	31
	For complete list of proteins and peptides identified in the above mentioned samples please see sheet 3, 4, 5 and 6
	** - Please refer Figure S9-10 for MS/MS spectrum
	*** - Please refer fig. S10 for MS/MS spectrum

## Sheet: Sheet3-SpGFP 01 GluC digest
LC-MALDI analysis of SpGFP 01 isolated from chloroplasts and digested with GluC
Database	NCBInr
Fasta file	NCBInr_20131113.fasta
Total sequences	34201960
Total residues	12001222213
Sequences after taxonomy filter	34201960
Number of queries	462
Number of matches above identity threshold in search of real database	15
Number of matches above identity threshold in search of decoy database	0
Number of matches above homology threshold in search of real database	18
Number of matches above homology threshold in search of decoy database	1
Fixed modifications
Identifier	Name	Delta	Neutral loss
1	Carbamidomethyl (C)	57.0215
Variable modifications
Identifier	Name	Delta	Neutral loss(es)
1	Oxidation (M)	15.9949	0	63.9983
Search Parameters
Taxonomy filter	All entries
Enzyme	V8-DE
Maximum Missed Cleavages	1
Fixed modifications	Carbamidomethyl (C)
Variable modifications	Oxidation (M)
Peptide Mass Tolerance	100
Peptide Mass Tolerance Units	ppm
Fragment Mass Tolerance	0.75
Fragment Mass Tolerance Units	Da
Mass values	Monoisotopic
Instrument type	MALDI-TOF-TOF
Decoy database also searched	1
USER00	PEP_INT(58.120056:17.673313,61.362671:39.295744,62.832215:22.583689,64.473465:21.368605,65.715255:27.311399,70.247489:32.829131,72.690749:25.359543,78.168608:42.874448,80.815599:41.801500,83.566492:76.285192,88.794523:41.165190,90.494948:23.097921,92.097934:21.022064,93.751356:22.138637,98.022484:30.116279,101.258838:40.792095,102.986041:58.451086,104.455268:33.179403,106.140416:41.444225,108.355…
Format parameters	--------------------------------------------------------
Significance threshold	0.05
Max. number of hits	0
Use MudPIT protein scoring	1
Ions score cut-off	0.1
Include same-set proteins	0
Include sub-set proteins	1
Include unassigned	0
Require bold red	0
Use homology threshold	1
Group protein families	1
Re-score using Percolator	0
Protein hits	--------------------------------------------------------
prot_hit_num	prot_family_member	prot_acc	prot_desc	prot_score	prot_mass	prot_matches	prot_matches_sig	prot_sequences	prot_sequences_sig	pep_query	pep_rank	pep_isbold	pep_isunique	pep_exp_mz	pep_exp_mr	pep_exp_z	pep_calc_mr	pep_delta	pep_start	pep_end	pep_miss	pep_score	pep_expect	pep_res_before	pep_seq	pep_res_after	pep_var_mod	pep_var_mod_pos	pep_summed_mod_pos	pep_scan_title
1	1	gi|446599224	glutamyl endopeptidase [Staphylococcus aureus]	583	35696	13	13	10	10	79	1	1	0	1223.75	1222.74	1	1222.69	0.0498	214	224	0	63.24	0.0032	E	SKGKITYLKGE	A				3c51f981-a47e-4588-ae6e-079f196832b9
1	1	gi|446599224	glutamyl endopeptidase [Staphylococcus aureus]	583	35696	13	13	10	10	89	1	1	0	1260.67	1259.66	1	1259.62	0.0464	179	190	0	62.93	0.0014	E	VVKPATMSNNAE	T				2cbcf714-1ae0-4a38-a64f-f6e33802c7dc
1	1	gi|446599224	glutamyl endopeptidase [Staphylococcus aureus]	583	35696	13	13	10	10	108	1	1	1	1321.62	1320.62	1	1320.53	0.0832	297	308	1	39.07	0.06	D	NPNNPDNPNNPD	Q				6b9a2597-6149-4fed-bb5e-de2dbf42819e
1	1	gi|446599224	glutamyl endopeptidase [Staphylococcus aureus]	583	35696	13	13	10	10	132	1	1	0	1466.71	1465.7	1	1465.67	0.034	230	244	0	105.77	3.1e-07	D	LSTTGGNSGSPVFNE	K				d4a4bd3c-9785-4bd3-9b18-42c471c7b38a
1	1	gi|446599224	glutamyl endopeptidase [Staphylococcus aureus]	583	35696	13	13	10	10	172	1	1	1	1660.71	1659.7	1	1659.69	0.0116	303	317	1	66.77	0.00024	D	NPNNPDQPNNPNNPD	N				f2e81d27-1f14-47d0-82a9-93302f0764e3
1	1	gi|446599224	glutamyl endopeptidase [Staphylococcus aureus]	583	35696	13	13	10	10	173	1	1	1	1660.74	1659.73	1	1659.69	0.047	303	317	1	83.45	7.9e-05	D	NPNNPDQPNNPNNPD	N				0c90c290-e1ae-4fb6-afc9-78ff58656df5
1	1	gi|446599224	glutamyl endopeptidase [Staphylococcus aureus]	583	35696	13	13	10	10	201	1	1	0	1837.93	1836.92	1	1836.85	0.0714	230	247	1	134.05	6.7e-11	D	LSTTGGNSGSPVFNEKNE	V				8b014826-3c0d-451e-91b3-1acf8b54b307
1	1	gi|446599224	glutamyl endopeptidase [Staphylococcus aureus]	583	35696	13	13	10	10	215	1	1	0	1924.06	1923.05	1	1923.02	0.0323	162	178	1	109.84	1.8e-07	D	LAIVKFSPNEQNKHIGE	V				9ccc10e9-6e6e-4b21-90d7-faf170a3deff
1	1	gi|446599224	glutamyl endopeptidase [Staphylococcus aureus]	583	35696	13	13	10	10	270	1	1	0	2268.09	2267.08	1	2267.15	-0.0696	248	268	0	66.19	4.7e-05	E	VIGIHWGGVPNQFNGAVFINE	N				d747cb16-e0ff-4f9e-bf1e-ce9a7c77bdaf
1	1	gi|446599224	glutamyl endopeptidase [Staphylococcus aureus]	583	35696	13	13	10	10	271	1	1	0	2268.21	2267.21	1	2267.15	0.0585	248	268	0	134.44	1.7e-10	E	VIGIHWGGVPNQFNGAVFINE	N				24c6537f-2b01-48d1-bf9d-44d22c6c2cd4
1	1	gi|446599224	glutamyl endopeptidase [Staphylococcus aureus]	583	35696	13	13	10	10	355	1	1	0	2549.28	2548.27	1	2548.23	0.0476	191	213	1	84.87	9.2e-07	E	TQVNQNITVTGYPGDKPVATMWE	S				c3cea951-cda7-46b1-aafc-76b1896c006d
1	1	gi|446599224	glutamyl endopeptidase [Staphylococcus aureus]	583	35696	13	13	10	10	358	1	1	0	2565.28	2564.27	1	2564.22	0.0524	191	213	1	55.87	0.0005	E	TQVNQNITVTGYPGDKPVATMWE	S	Oxidation (M)	0.00000000000000000000100.0		2f2da60a-4525-453f-a7bd-be6b2c1e3f61
1	1	gi|446599224	glutamyl endopeptidase [Staphylococcus aureus]	583	35696	13	13	10	10	374	1	1	0	2639.32	2638.31	1	2638.33	-0.0183	245	268	1	119.63	1.4e-09	E	KNEVIGIHWGGVPNQFNGAVFINE	N				0a1438ea-8420-4ac9-bfb9-22b1252656a1
1	2	gi|133874615	VSPase [Staphylococcus aureus]	540	36717	11	11	9	9	79	1	0	0	1223.75	1222.74	1	1222.69	0.0498	214	224	0	63.24	0.0032	E	SKGKITYLKGE	A				3c51f981-a47e-4588-ae6e-079f196832b9
1	2	gi|133874615	VSPase [Staphylococcus aureus]	540	36717	11	11	9	9	89	1	0	0	1260.67	1259.66	1	1259.62	0.0464	179	190	0	62.93	0.0014	E	VVKPATMSNNAE	T				2cbcf714-1ae0-4a38-a64f-f6e33802c7dc
1	2	gi|133874615	VSPase [Staphylococcus aureus]	540	36717	11	11	9	9	112	1	0	1	1335.64	1334.63	1	1334.55	0.0813	312	323	1	52.25	0.0073	D	NPDQPNNPNNPD	N				87e75fbb-d8ad-4c44-a489-f59d754c46ec
1	2	gi|133874615	VSPase [Staphylococcus aureus]	540	36717	11	11	9	9	132	1	0	0	1466.71	1465.7	1	1465.67	0.034	230	244	0	105.77	3.1e-07	D	LSTTGGNSGSPVFNE	K				d4a4bd3c-9785-4bd3-9b18-42c471c7b38a
1	2	gi|133874615	VSPase [Staphylococcus aureus]	540	36717	11	11	9	9	201	1	0	0	1837.93	1836.92	1	1836.85	0.0714	230	247	1	134.05	6.7e-11	D	LSTTGGNSGSPVFNEKNE	V				8b014826-3c0d-451e-91b3-1acf8b54b307
1	2	gi|133874615	VSPase [Staphylococcus aureus]	540	36717	11	11	9	9	215	1	0	0	1924.06	1923.05	1	1923.02	0.0323	162	178	1	109.84	1.8e-07	D	LAIVKFSPNEQNKHIGE	V				9ccc10e9-6e6e-4b21-90d7-faf170a3deff
1	2	gi|133874615	VSPase [Staphylococcus aureus]	540	36717	11	11	9	9	270	1	0	0	2268.09	2267.08	1	2267.15	-0.0696	248	268	0	66.19	4.7e-05	E	VIGIHWGGVPNQFNGAVFINE	N				d747cb16-e0ff-4f9e-bf1e-ce9a7c77bdaf
1	2	gi|133874615	VSPase [Staphylococcus aureus]	540	36717	11	11	9	9	271	1	0	0	2268.21	2267.21	1	2267.15	0.0585	248	268	0	134.44	1.7e-10	E	VIGIHWGGVPNQFNGAVFINE	N				24c6537f-2b01-48d1-bf9d-44d22c6c2cd4
1	2	gi|133874615	VSPase [Staphylococcus aureus]	540	36717	11	11	9	9	355	1	0	0	2549.28	2548.27	1	2548.23	0.0476	191	213	1	84.87	9.2e-07	E	TQVNQNITVTGYPGDKPVATMWE	S				c3cea951-cda7-46b1-aafc-76b1896c006d
1	2	gi|133874615	VSPase [Staphylococcus aureus]	540	36717	11	11	9	9	358	1	0	0	2565.28	2564.27	1	2564.22	0.0524	191	213	1	55.87	0.0005	E	TQVNQNITVTGYPGDKPVATMWE	S	Oxidation (M)	0.00000000000000000000100.0		2f2da60a-4525-453f-a7bd-be6b2c1e3f61
1	2	gi|133874615	VSPase [Staphylococcus aureus]	540	36717	11	11	9	9	374	1	0	0	2639.32	2638.31	1	2638.33	-0.0183	245	268	1	119.63	1.4e-09	E	KNEVIGIHWGGVPNQFNGAVFINE	N				0a1438ea-8420-4ac9-bfb9-22b1252656a1
1		gi|446599217	glutamyl endopeptidase [Staphylococcus aureus]	441	38731	11	11	8	8	79	1	0	0	1223.75	1222.74	1	1222.69	0.0498	214	224	0	63.24	0.0032	E	SKGKITYLKGE	A				3c51f981-a47e-4588-ae6e-079f196832b9
1		gi|446599217	glutamyl endopeptidase [Staphylococcus aureus]	441	38731	11	11	8	8	89	1	0	0	1260.67	1259.66	1	1259.62	0.0464	179	190	0	62.93	0.0014	E	VVKPATMSNNAE	T				2cbcf714-1ae0-4a38-a64f-f6e33802c7dc
1		gi|446599217	glutamyl endopeptidase [Staphylococcus aureus]	441	38731	11	11	8	8	108	1	0	1	1321.62	1320.62	1	1320.53	0.0832	297	308	1	39.07	0.06	D	NPNNPDNPNNPD	N				6b9a2597-6149-4fed-bb5e-de2dbf42819e
1		gi|446599217	glutamyl endopeptidase [Staphylococcus aureus]	441	38731	11	11	8	8	172	1	0	1	1660.71	1659.7	1	1659.69	0.0116	330	344	1	66.77	0.00024	D	NPNNPDQPNNPNNPD	N				f2e81d27-1f14-47d0-82a9-93302f0764e3
1		gi|446599217	glutamyl endopeptidase [Staphylococcus aureus]	441	38731	11	11	8	8	173	1	0	1	1660.74	1659.73	1	1659.69	0.047	330	344	1	83.45	7.9e-05	D	NPNNPDQPNNPNNPD	N				0c90c290-e1ae-4fb6-afc9-78ff58656df5
1		gi|446599217	glutamyl endopeptidase [Staphylococcus aureus]	441	38731	11	11	8	8	215	1	0	0	1924.06	1923.05	1	1923.02	0.0323	162	178	1	109.84	1.8e-07	D	LAIVKFSPNEQNKHIGE	V				9ccc10e9-6e6e-4b21-90d7-faf170a3deff
1		gi|446599217	glutamyl endopeptidase [Staphylococcus aureus]	441	38731	11	11	8	8	270	1	0	0	2268.09	2267.08	1	2267.15	-0.0696	248	268	0	66.19	4.7e-05	E	VIGIHWGGVPNQFNGAVFINE	N				d747cb16-e0ff-4f9e-bf1e-ce9a7c77bdaf
1		gi|446599217	glutamyl endopeptidase [Staphylococcus aureus]	441	38731	11	11	8	8	271	1	0	0	2268.21	2267.21	1	2267.15	0.0585	248	268	0	134.44	1.7e-10	E	VIGIHWGGVPNQFNGAVFINE	N				24c6537f-2b01-48d1-bf9d-44d22c6c2cd4
1		gi|446599217	glutamyl endopeptidase [Staphylococcus aureus]	441	38731	11	11	8	8	355	1	0	0	2549.28	2548.27	1	2548.23	0.0476	191	213	1	84.87	9.2e-07	E	TQVNQNITVTGYPGDKPVATMWE	S				c3cea951-cda7-46b1-aafc-76b1896c006d
1		gi|446599217	glutamyl endopeptidase [Staphylococcus aureus]	441	38731	11	11	8	8	358	1	0	0	2565.28	2564.27	1	2564.22	0.0524	191	213	1	55.87	0.0005	E	TQVNQNITVTGYPGDKPVATMWE	S	Oxidation (M)	0.00000000000000000000100.0		2f2da60a-4525-453f-a7bd-be6b2c1e3f61
1		gi|446599217	glutamyl endopeptidase [Staphylococcus aureus]	441	38731	11	11	8	8	374	1	0	0	2639.32	2638.31	1	2638.33	-0.0183	245	268	1	119.63	1.4e-09	E	KNEVIGIHWGGVPNQFNGAVFINE	N				0a1438ea-8420-4ac9-bfb9-22b1252656a1
1		gi|265412	V8 protease [Staphylococcus aureus, Peptide, 276 aa]	392	29972	10	10	8	8	79	1	0	0	1223.75	1222.74	1	1222.69	0.0498	146	156	0	63.24	0.0032	E	SKGKITYLKGE	A				3c51f981-a47e-4588-ae6e-079f196832b9
1		gi|265412	V8 protease [Staphylococcus aureus, Peptide, 276 aa]	392	29972	10	10	8	8	89	1	0	0	1260.67	1259.66	1	1259.62	0.0464	111	122	0	62.93	0.0014	E	VVKPATMSNNAE	T				2cbcf714-1ae0-4a38-a64f-f6e33802c7dc
1		gi|265412	V8 protease [Staphylococcus aureus, Peptide, 276 aa]	392	29972	10	10	8	8	108	1	0	1	1321.62	1320.62	1	1320.53	0.0832	229	240	1	39.07	0.06	D	NPNNPDNPNNPD	N				6b9a2597-6149-4fed-bb5e-de2dbf42819e
1		gi|265412	V8 protease [Staphylococcus aureus, Peptide, 276 aa]	392	29972	10	10	8	8	132	1	0	0	1466.71	1465.7	1	1465.67	0.034	162	176	0	105.77	3.1e-07	D	LSTTGGNSGSPVFNE	K				d4a4bd3c-9785-4bd3-9b18-42c471c7b38a
1		gi|265412	V8 protease [Staphylococcus aureus, Peptide, 276 aa]	392	29972	10	10	8	8	172	1	0	1	1660.71	1659.7	1	1659.69	0.0116	262	276	1	66.77	0.00024	D	NPNNPDQPNNPNNPD	-				f2e81d27-1f14-47d0-82a9-93302f0764e3
1		gi|265412	V8 protease [Staphylococcus aureus, Peptide, 276 aa]	392	29972	10	10	8	8	173	1	0	1	1660.74	1659.73	1	1659.69	0.047	262	276	1	83.45	7.9e-05	D	NPNNPDQPNNPNNPD	-				0c90c290-e1ae-4fb6-afc9-78ff58656df5
1		gi|265412	V8 protease [Staphylococcus aureus, Peptide, 276 aa]	392	29972	10	10	8	8	201	1	0	0	1837.93	1836.92	1	1836.85	0.0714	162	179	1	134.05	6.7e-11	D	LSTTGGNSGSPVFNEKNE	V				8b014826-3c0d-451e-91b3-1acf8b54b307
1		gi|265412	V8 protease [Staphylococcus aureus, Peptide, 276 aa]	392	29972	10	10	8	8	215	1	0	0	1924.06	1923.05	1	1923.02	0.0323	94	110	1	109.84	1.8e-07	D	LAIVKFSPNEQNKHIGE	V				9ccc10e9-6e6e-4b21-90d7-faf170a3deff
1		gi|265412	V8 protease [Staphylococcus aureus, Peptide, 276 aa]	392	29972	10	10	8	8	355	1	0	0	2549.28	2548.27	1	2548.23	0.0476	123	145	1	84.87	9.2e-07	E	TQVNQNITVTGYPGDKPVATMWE	S				c3cea951-cda7-46b1-aafc-76b1896c006d
1		gi|265412	V8 protease [Staphylococcus aureus, Peptide, 276 aa]	392	29972	10	10	8	8	358	1	0	0	2565.28	2564.27	1	2564.22	0.0524	123	145	1	55.87	0.0005	E	TQVNQNITVTGYPGDKPVATMWE	S	Oxidation (M)	0.00000000000000000000100.0		2f2da60a-4525-453f-a7bd-be6b2c1e3f61
1		gi|21282661	serine protease; V8 protease; glutamyl endopeptidase [Staphylococcus aureus subsp. aureus MW2]	340	35297	7	7	6	6	79	1	0	0	1223.75	1222.74	1	1222.69	0.0498	214	224	0	63.24	0.0032	E	SKGKITYLKGE	A				3c51f981-a47e-4588-ae6e-079f196832b9
1		gi|21282661	serine protease; V8 protease; glutamyl endopeptidase [Staphylococcus aureus subsp. aureus MW2]	340	35297	7	7	6	6	89	1	0	0	1260.67	1259.66	1	1259.62	0.0464	179	190	0	62.93	0.0014	E	VVKPATMSNNAE	T				2cbcf714-1ae0-4a38-a64f-f6e33802c7dc
1		gi|21282661	serine protease; V8 protease; glutamyl endopeptidase [Staphylococcus aureus subsp. aureus MW2]	340	35297	7	7	6	6	132	1	0	0	1466.71	1465.7	1	1465.67	0.034	230	244	0	105.77	3.1e-07	D	LSTTGGNSGSPVFNE	K				d4a4bd3c-9785-4bd3-9b18-42c471c7b38a
1		gi|21282661	serine protease; V8 protease; glutamyl endopeptidase [Staphylococcus aureus subsp. aureus MW2]	340	35297	7	7	6	6	201	1	0	0	1837.93	1836.92	1	1836.85	0.0714	230	247	1	134.05	6.7e-11	D	LSTTGGNSGSPVFNEKNE	V				8b014826-3c0d-451e-91b3-1acf8b54b307
1		gi|21282661	serine protease; V8 protease; glutamyl endopeptidase [Staphylococcus aureus subsp. aureus MW2]	340	35297	7	7	6	6	215	1	0	0	1924.06	1923.05	1	1923.02	0.0323	162	178	1	109.84	1.8e-07	D	LAIVKFSPNEQNKHIGE	V				9ccc10e9-6e6e-4b21-90d7-faf170a3deff
1		gi|21282661	serine protease; V8 protease; glutamyl endopeptidase [Staphylococcus aureus subsp. aureus MW2]	340	35297	7	7	6	6	355	1	0	0	2549.28	2548.27	1	2548.23	0.0476	191	213	1	84.87	9.2e-07	E	TQVNQNITVTGYPGDKPVATMWE	S				c3cea951-cda7-46b1-aafc-76b1896c006d
1		gi|21282661	serine protease; V8 protease; glutamyl endopeptidase [Staphylococcus aureus subsp. aureus MW2]	340	35297	7	7	6	6	358	1	0	0	2565.28	2564.27	1	2564.22	0.0524	191	213	1	55.87	0.0005	E	TQVNQNITVTGYPGDKPVATMWE	S	Oxidation (M)	0.00000000000000000000100.0		2f2da60a-4525-453f-a7bd-be6b2c1e3f61
1		gi|15924038	serine protease [Staphylococcus aureus subsp. aureus Mu50]	339	36955	8	8	7	7	79	1	0	0	1223.75	1222.74	1	1222.69	0.0498	214	224	0	63.24	0.0032	E	SKGKITYLKGE	A				3c51f981-a47e-4588-ae6e-079f196832b9
1		gi|15924038	serine protease [Staphylococcus aureus subsp. aureus Mu50]	339	36955	8	8	7	7	89	1	0	0	1260.67	1259.66	1	1259.62	0.0464	179	190	0	62.93	0.0014	E	VVKPATMSNNAE	T				2cbcf714-1ae0-4a38-a64f-f6e33802c7dc
1		gi|15924038	serine protease [Staphylococcus aureus subsp. aureus Mu50]	339	36955	8	8	7	7	108	1	0	1	1321.62	1320.62	1	1320.53	0.0832	297	308	1	39.07	0.06	D	NPNNPDNPNNPD	N				6b9a2597-6149-4fed-bb5e-de2dbf42819e
1		gi|15924038	serine protease [Staphylococcus aureus subsp. aureus Mu50]	339	36955	8	8	7	7	132	1	0	0	1466.71	1465.7	1	1465.67	0.034	230	244	0	105.77	3.1e-07	D	LSTTGGNSGSPVFNE	K				d4a4bd3c-9785-4bd3-9b18-42c471c7b38a
1		gi|15924038	serine protease [Staphylococcus aureus subsp. aureus Mu50]	339	36955	8	8	7	7	201	1	0	0	1837.93	1836.92	1	1836.85	0.0714	230	247	1	134.05	6.7e-11	D	LSTTGGNSGSPVFNEKNE	V				8b014826-3c0d-451e-91b3-1acf8b54b307
1		gi|15924038	serine protease [Staphylococcus aureus subsp. aureus Mu50]	339	36955	8	8	7	7	215	1	0	0	1924.06	1923.05	1	1923.02	0.0323	162	178	1	109.84	1.8e-07	D	LAIVKFSPNEQNKHIGE	V				9ccc10e9-6e6e-4b21-90d7-faf170a3deff
1		gi|15924038	serine protease [Staphylococcus aureus subsp. aureus Mu50]	339	36955	8	8	7	7	355	1	0	0	2549.28	2548.27	1	2548.23	0.0476	191	213	1	84.87	9.2e-07	E	TQVNQNITVTGYPGDKPVATMWE	S				c3cea951-cda7-46b1-aafc-76b1896c006d
1		gi|15924038	serine protease [Staphylococcus aureus subsp. aureus Mu50]	339	36955	8	8	7	7	358	1	0	0	2565.28	2564.27	1	2564.22	0.0524	191	213	1	55.87	0.0005	E	TQVNQNITVTGYPGDKPVATMWE	S	Oxidation (M)	0.00000000000000000000100.0		2f2da60a-4525-453f-a7bd-be6b2c1e3f61
1		gi|386830586	glutamyl endopeptidase [Staphylococcus aureus subsp. aureus HO 5096 0412]	323	34942	7	7	6	6	79	1	0	0	1223.75	1222.74	1	1222.69	0.0498	180	190	0	63.24	0.0032	E	SKGKITYLKGE	A				3c51f981-a47e-4588-ae6e-079f196832b9
1		gi|386830586	glutamyl endopeptidase [Staphylococcus aureus subsp. aureus HO 5096 0412]	323	34942	7	7	6	6	108	1	0	1	1321.62	1320.62	1	1320.53	0.0832	275	286	1	39.07	0.06	D	NPNNPDNPNNPD	N				6b9a2597-6149-4fed-bb5e-de2dbf42819e
1		gi|386830586	glutamyl endopeptidase [Staphylococcus aureus subsp. aureus HO 5096 0412]	323	34942	7	7	6	6	132	1	0	0	1466.71	1465.7	1	1465.67	0.034	196	210	0	105.77	3.1e-07	D	LSTTGGNSGSPVFNE	K				d4a4bd3c-9785-4bd3-9b18-42c471c7b38a
1		gi|386830586	glutamyl endopeptidase [Staphylococcus aureus subsp. aureus HO 5096 0412]	323	34942	7	7	6	6	201	1	0	0	1837.93	1836.92	1	1836.85	0.0714	196	213	1	134.05	6.7e-11	D	LSTTGGNSGSPVFNEKNE	V				8b014826-3c0d-451e-91b3-1acf8b54b307
1		gi|386830586	glutamyl endopeptidase [Staphylococcus aureus subsp. aureus HO 5096 0412]	323	34942	7	7	6	6	215	1	0	0	1924.06	1923.05	1	1923.02	0.0323	128	144	1	109.84	1.8e-07	D	LAIVKFSPNEQNKHIGE	V				9ccc10e9-6e6e-4b21-90d7-faf170a3deff
1		gi|386830586	glutamyl endopeptidase [Staphylococcus aureus subsp. aureus HO 5096 0412]	323	34942	7	7	6	6	355	1	0	0	2549.28	2548.27	1	2548.23	0.0476	157	179	1	84.87	9.2e-07	E	TQVNQNITVTGYPGDKPVATMWE	S				c3cea951-cda7-46b1-aafc-76b1896c006d
1		gi|386830586	glutamyl endopeptidase [Staphylococcus aureus subsp. aureus HO 5096 0412]	323	34942	7	7	6	6	358	1	0	0	2565.28	2564.27	1	2564.22	0.0524	157	179	1	55.87	0.0005	E	TQVNQNITVTGYPGDKPVATMWE	S	Oxidation (M)	0.00000000000000000000100.0		2f2da60a-4525-453f-a7bd-be6b2c1e3f61
1		gi|46015384	Chain A, Structue Of V8 Protease From Staphylococcus Aureus	273	29636	6	6	6	6	79	1	0	0	1223.75	1222.74	1	1222.69	0.0498	146	156	0	63.24	0.0032	E	SKGKITYLKGE	A				3c51f981-a47e-4588-ae6e-079f196832b9
1		gi|46015384	Chain A, Structue Of V8 Protease From Staphylococcus Aureus	273	29636	6	6	6	6	89	1	0	0	1260.67	1259.66	1	1259.62	0.0464	111	122	0	62.93	0.0014	E	VVKPATMSNNAE	T				2cbcf714-1ae0-4a38-a64f-f6e33802c7dc
1		gi|46015384	Chain A, Structue Of V8 Protease From Staphylococcus Aureus	273	29636	6	6	6	6	108	1	0	1	1321.62	1320.62	1	1320.53	0.0832	229	240	1	39.07	0.06	D	NPNNPDNPNNPD	N				6b9a2597-6149-4fed-bb5e-de2dbf42819e
1		gi|46015384	Chain A, Structue Of V8 Protease From Staphylococcus Aureus	273	29636	6	6	6	6	132	1	0	0	1466.71	1465.7	1	1465.67	0.034	162	176	0	105.77	3.1e-07	D	LSTTGGNSGSPVFNE	K				d4a4bd3c-9785-4bd3-9b18-42c471c7b38a
1		gi|46015384	Chain A, Structue Of V8 Protease From Staphylococcus Aureus	273	29636	6	6	6	6	201	1	0	0	1837.93	1836.92	1	1836.85	0.0714	162	179	1	134.05	6.7e-11	D	LSTTGGNSGSPVFNEKNE	V				8b014826-3c0d-451e-91b3-1acf8b54b307
1		gi|46015384	Chain A, Structue Of V8 Protease From Staphylococcus Aureus	273	29636	6	6	6	6	215	1	0	0	1924.06	1923.05	1	1923.02	0.0323	94	110	1	109.84	1.8e-07	D	LAIVKFSPNEQNKHIGE	V				9ccc10e9-6e6e-4b21-90d7-faf170a3deff
1		gi|487715882	glutamyl endopeptidase [Staphylococcus aureus]	251	27896	6	6	5	5	79	1	0	0	1223.75	1222.74	1	1222.69	0.0498	199	209	0	63.24	0.0032	E	SKGKITYLKGE	A				3c51f981-a47e-4588-ae6e-079f196832b9
1		gi|487715882	glutamyl endopeptidase [Staphylococcus aureus]	251	27896	6	6	5	5	89	1	0	0	1260.67	1259.66	1	1259.62	0.0464	164	175	0	62.93	0.0014	E	VVKPATMSNNAE	T				2cbcf714-1ae0-4a38-a64f-f6e33802c7dc
1		gi|487715882	glutamyl endopeptidase [Staphylococcus aureus]	251	27896	6	6	5	5	132	1	0	0	1466.71	1465.7	1	1465.67	0.034	215	229	0	105.77	3.1e-07	D	LSTTGGNSGSPVFNE	K				d4a4bd3c-9785-4bd3-9b18-42c471c7b38a
1		gi|487715882	glutamyl endopeptidase [Staphylococcus aureus]	251	27896	6	6	5	5	215	1	0	0	1924.06	1923.05	1	1923.02	0.0323	147	163	1	109.84	1.8e-07	D	LAIVKFSPNEQNKHIGE	V				9ccc10e9-6e6e-4b21-90d7-faf170a3deff
1		gi|487715882	glutamyl endopeptidase [Staphylococcus aureus]	251	27896	6	6	5	5	355	1	0	0	2549.28	2548.27	1	2548.23	0.0476	176	198	1	84.87	9.2e-07	E	TQVNQNITVTGYPGDKPVATMWE	S				c3cea951-cda7-46b1-aafc-76b1896c006d
1		gi|487715882	glutamyl endopeptidase [Staphylococcus aureus]	251	27896	6	6	5	5	358	1	0	0	2565.28	2564.27	1	2564.22	0.0524	176	198	1	55.87	0.0005	E	TQVNQNITVTGYPGDKPVATMWE	S	Oxidation (M)	0.00000000000000000000100.0		2f2da60a-4525-453f-a7bd-be6b2c1e3f61
1		gi|446599188	glutamyl endopeptidase [Staphylococcus aureus]	196	36981	6	6	5	5	79	1	0	0	1223.75	1222.74	1	1222.69	0.0498	214	224	0	63.24	0.0032	E	SKGKITYLKGE	A				3c51f981-a47e-4588-ae6e-079f196832b9
1		gi|446599188	glutamyl endopeptidase [Staphylococcus aureus]	196	36981	6	6	5	5	89	1	0	0	1260.67	1259.66	1	1259.62	0.0464	179	190	0	62.93	0.0014	E	VVKPATMSNNAE	T				2cbcf714-1ae0-4a38-a64f-f6e33802c7dc
1		gi|446599188	glutamyl endopeptidase [Staphylococcus aureus]	196	36981	6	6	5	5	108	1	0	1	1321.62	1320.62	1	1320.53	0.0832	297	308	1	39.07	0.06	D	NPNNPDNPNNPD	N				6b9a2597-6149-4fed-bb5e-de2dbf42819e
1		gi|446599188	glutamyl endopeptidase [Staphylococcus aureus]	196	36981	6	6	5	5	215	1	0	0	1924.06	1923.05	1	1923.02	0.0323	162	178	1	109.84	1.8e-07	D	LAIVKFSPNEQNKHIGE	V				9ccc10e9-6e6e-4b21-90d7-faf170a3deff
1		gi|446599188	glutamyl endopeptidase [Staphylococcus aureus]	196	36981	6	6	5	5	355	1	0	0	2549.28	2548.27	1	2548.23	0.0476	191	213	1	84.87	9.2e-07	E	TQVNQNITVTGYPGDKPVATMWE	S				c3cea951-cda7-46b1-aafc-76b1896c006d
1		gi|446599188	glutamyl endopeptidase [Staphylococcus aureus]	196	36981	6	6	5	5	358	1	0	0	2565.28	2564.27	1	2564.22	0.0524	191	213	1	55.87	0.0005	E	TQVNQNITVTGYPGDKPVATMWE	S	Oxidation (M)	0.00000000000000000000100.0		2f2da60a-4525-453f-a7bd-be6b2c1e3f61
1		gi|379795421	glutamyl endopeptidase [Staphylococcus aureus subsp. aureus MSHR1132]	77	36887	2	2	2	2	79	1	0	0	1223.75	1222.74	1	1222.69	0.0498	214	224	0	63.24	0.0032	E	SKGKITYLKGE	A				3c51f981-a47e-4588-ae6e-079f196832b9
1		gi|379795421	glutamyl endopeptidase [Staphylococcus aureus subsp. aureus MSHR1132]	77	36887	2	2	2	2	89	1	0	0	1260.67	1259.66	1	1259.62	0.0464	179	190	0	62.93	0.0014	E	VVKPATMSNNAE	T				2cbcf714-1ae0-4a38-a64f-f6e33802c7dc
1		gi|517287297	hypothetical protein [Pontibacter roseus]	39	168552	1	1	1	1	108	1	0	1	1321.62	1320.62	1	1320.53	0.0832	456	467	1	39.07	0.06	D	NPNNPDNPNNPD	D				6b9a2597-6149-4fed-bb5e-de2dbf42819e
2	1	gi|165365	Ig kappa chain, partial [Oryctolagus cuniculus]	111	12473	1	1	1	1	340	1	1	1	2491.21	2490.2	1	2490.13	0.0753	95	116	1	111.3	2.3e-09	E	YTCQVAQDSGSPVVQSFSRKSC	-				b708c708-3fca-41e4-8920-ce1840cc433a
3	1	gi|155663	green-fluorescent protein [Aequorea victoria]	77	27017	2	2	1	1	121	1	1	1	1364.65	1363.64	1	1363.61	0.0346	223	235	1	68.66	0.0017	E	FVTAAGITHGMDE	L	Oxidation (M)	0.0000000000100.0		670d702c-2a86-4eda-83d7-786754ac29c0
3	1	gi|155663	green-fluorescent protein [Aequorea victoria]	77	27017	2	2	1	1	122	1	1	1	1364.65	1363.64	1	1363.61	0.0354	223	235	1	60.76	0.0067	E	FVTAAGITHGMDE	L	Oxidation (M)	0.0000000000100.0		4643a97b-f5be-4521-b7e4-7be3f4b8078c
4	1	gi|15924037	cysteine protease [Staphylococcus aureus subsp. aureus Mu50]	69	44681	1	1	1	1	131	1	1	1	1464.7	1463.69	1	1463.71	-0.0176	355	365	1	68.93	0.00068	E	KLIYWNPWDTE	L				05d7f821-12f9-48b8-b90e-06793d762cb1
5	1	gi|125138	RecName: Full=Ig kappa-b4 chain C region	39	11264	1	1	1	1	263	1	1	1	2248.1	2247.09	1	2247.06	0.034	83	102	0	39.14	0.018	E	YTCKVTQGTTSVVQSFNRGD	C				6cbfaf14-68b4-49fc-a9af-07c23949150b

## Sheet: Sheet4-SpGFP 02 GluC digest
LC-MALDI analysis of SpGFP 02 isolated from chloroplasts and digested with GluC
Database	NCBInr
Fasta file	NCBInr_20131113.fasta
Total sequences	34201960
Total residues	12001222213
Sequences after taxonomy filter	34201960
Number of queries	513
Number of matches above identity threshold in search of real database	9
Number of matches above identity threshold in search of decoy database	0
Number of matches above homology threshold in search of real database	11
Number of matches above homology threshold in search of decoy database	0
Fixed modifications
Identifier	Name	Delta	Neutral loss
1	Carbamidomethyl (C)	57.0215
Variable modifications
Identifier	Name	Delta	Neutral loss(es)
1	Oxidation (M)	15.9949	0	63.9983
Search Parameters
Taxonomy filter	All entries
Enzyme	V8-DE
Maximum Missed Cleavages	1
Fixed modifications	Carbamidomethyl (C)
Variable modifications	Oxidation (M)
Peptide Mass Tolerance	100
Peptide Mass Tolerance Units	ppm
Fragment Mass Tolerance	0.75
Fragment Mass Tolerance Units	Da
Mass values	Monoisotopic
Instrument type	MALDI-TOF-TOF
Decoy database also searched	1
USER00	PEP_INT()
Format parameters
Significance threshold	0.00505
Max. number of hits	0
Use MudPIT protein scoring	1
Ions score cut-off	0.1
Include same-set proteins	0
Include sub-set proteins	1
Include unassigned	0
Require bold red	0
Use homology threshold	1
Group protein families	1
Re-score using Percolator	0
Protein hits
prot_hit_num	prot_family_member	prot_acc	prot_desc	prot_score	prot_mass	prot_matches	prot_matches_sig	prot_sequences	prot_sequences_sig	pep_query	pep_rank	pep_isbold	pep_isunique	pep_exp_mz	pep_exp_mr	pep_exp_z	pep_calc_mr	pep_delta	pep_start	pep_end	pep_miss	pep_score	pep_expect	pep_res_before	pep_seq	pep_res_after	pep_var_mod	pep_var_mod_pos	pep_summed_mod_pos	pep_scan_title
1	1	gi|265412	V8 protease [Staphylococcus aureus, Peptide, 276 aa]	285	29972	11	8	8	6	28	1	1	1	925.406	924.398	1	924.455	-0.0568	84	91	0	61.79	0.03	E	QITKYSGE	G				960f1afa-8a47-42e3-8850-a9dfce8e803d
1	1	gi|265412	V8 protease [Staphylococcus aureus, Peptide, 276 aa]	285	29972	11	8	8	6	29	1	1	1	925.447	924.44	1	924.455	-0.0151	84	91	0	65.06	0.016	E	QITKYSGE	G				cee377d9-df4e-4c55-8019-32882229ad81
1	1	gi|265412	V8 protease [Staphylococcus aureus, Peptide, 276 aa]	285	29972	11	8	8	6	82	1	1	1	1223.73	1222.72	1	1222.69	0.0279	146	156	0	69.97	0.0032	E	SKGKITYLKGE	A				582f541f-26ce-44d2-8229-f0b586d21f06
1	1	gi|265412	V8 protease [Staphylococcus aureus, Peptide, 276 aa]	285	29972	11	8	8	6	83	1	1	1	1223.74	1222.73	1	1222.69	0.0362	146	156	0	68	0.0043	E	SKGKITYLKGE	A				326df0d3-5827-4cb4-91ae-fb914585e8ef
1	1	gi|265412	V8 protease [Staphylococcus aureus, Peptide, 276 aa]	285	29972	11	8	8	6	95	1	1	1	1260.63	1259.63	1	1259.62	0.0095	111	122	0	72.66	0.00011	E	VVKPATMSNNAE	T				331279a2-a32f-4f52-a030-a1bbc440ff21
1	1	gi|265412	V8 protease [Staphylococcus aureus, Peptide, 276 aa]	285	29972	11	8	8	6	102	1	1	1	1276.63	1275.62	1	1275.61	0.0092	111	122	0	51.42	0.0039	E	VVKPATMSNNAE	T	Oxidation (M)	0.000000100000.0		8a30e1cb-b5da-4f72-b3bf-b14d61a1f800
1	1	gi|265412	V8 protease [Staphylococcus aureus, Peptide, 276 aa]	285	29972	11	8	8	6	143	1	1	1	1466.72	1465.71	1	1465.67	0.0453	162	176	0	92.39	1e-06	D	LSTTGGNSGSPVFNE	K				762cf3c2-acaa-4156-9d25-b369ec3d0706
1	1	gi|265412	V8 protease [Staphylococcus aureus, Peptide, 276 aa]	285	29972	11	8	8	6	160	1	1	1	1534.84	1533.83	1	1533.79	0.042	1	13	1	44.41	0.0096	-	VILPNNDRHQITD	T				fd6c0d69-aec1-4e7f-9ab1-731323bb719b
1	1	gi|265412	V8 protease [Staphylococcus aureus, Peptide, 276 aa]	285	29972	11	8	8	6	181	1	1	1	1660.74	1659.74	1	1659.69	0.0487	262	276	1	97.27	1.3e-06	D	NPNNPDQPNNPNNPD	-				9990cafb-10c0-40c8-8c10-0375019d465f
1	1	gi|265412	V8 protease [Staphylococcus aureus, Peptide, 276 aa]	285	29972	11	8	8	6	201	1	1	1	1837.88	1836.88	1	1836.85	0.0279	162	179	1	160.28	1.5e-12	D	LSTTGGNSGSPVFNEKNE	V				844dc3b9-3e31-4869-8e8c-2f4c5c8ad61d
1	1	gi|265412	V8 protease [Staphylococcus aureus, Peptide, 276 aa]	285	29972	11	8	8	6	213	1	1	1	1924.09	1923.08	1	1923.02	0.0633	94	110	1	94.45	2.4e-06	D	LAIVKFSPNEQNKHIGE	V				ea2d4e20-f1c8-4bb0-82df-cad1c2c9a1c9
1		gi|133874615	VSPase [Staphylococcus aureus]	248	36717	10	7	7	5	28	1	0	1	925.406	924.398	1	924.455	-0.0568	152	159	0	61.79	0.03	E	QITKYSGE	G				960f1afa-8a47-42e3-8850-a9dfce8e803d
1		gi|133874615	VSPase [Staphylococcus aureus]	248	36717	10	7	7	5	29	1	0	1	925.447	924.44	1	924.455	-0.0151	152	159	0	65.06	0.016	E	QITKYSGE	G				cee377d9-df4e-4c55-8019-32882229ad81
1		gi|133874615	VSPase [Staphylococcus aureus]	248	36717	10	7	7	5	82	1	0	1	1223.73	1222.72	1	1222.69	0.0279	214	224	0	69.97	0.0032	E	SKGKITYLKGE	A				582f541f-26ce-44d2-8229-f0b586d21f06
1		gi|133874615	VSPase [Staphylococcus aureus]	248	36717	10	7	7	5	83	1	0	1	1223.74	1222.73	1	1222.69	0.0362	214	224	0	68	0.0043	E	SKGKITYLKGE	A				326df0d3-5827-4cb4-91ae-fb914585e8ef
1		gi|133874615	VSPase [Staphylococcus aureus]	248	36717	10	7	7	5	95	1	0	1	1260.63	1259.63	1	1259.62	0.0095	179	190	0	72.66	0.00011	E	VVKPATMSNNAE	T				331279a2-a32f-4f52-a030-a1bbc440ff21
1		gi|133874615	VSPase [Staphylococcus aureus]	248	36717	10	7	7	5	102	1	0	1	1276.63	1275.62	1	1275.61	0.0092	179	190	0	51.42	0.0039	E	VVKPATMSNNAE	T	Oxidation (M)	0.000000100000.0		8a30e1cb-b5da-4f72-b3bf-b14d61a1f800
1		gi|133874615	VSPase [Staphylococcus aureus]	248	36717	10	7	7	5	117	1	0	1	1335.5	1334.49	1	1334.55	-0.0559	312	323	1	63.17	0.0063	D	NPDQPNNPNNPD	N				7666bc1c-bff1-4b51-91c4-85a5459f27ad
1		gi|133874615	VSPase [Staphylococcus aureus]	248	36717	10	7	7	5	143	1	0	1	1466.72	1465.71	1	1465.67	0.0453	230	244	0	92.39	1e-06	D	LSTTGGNSGSPVFNE	K				762cf3c2-acaa-4156-9d25-b369ec3d0706
1		gi|133874615	VSPase [Staphylococcus aureus]	248	36717	10	7	7	5	201	1	0	1	1837.88	1836.88	1	1836.85	0.0279	230	247	1	160.28	1.5e-12	D	LSTTGGNSGSPVFNEKNE	V				844dc3b9-3e31-4869-8e8c-2f4c5c8ad61d
1		gi|133874615	VSPase [Staphylococcus aureus]	248	36717	10	7	7	5	213	1	0	1	1924.09	1923.08	1	1923.02	0.0633	162	178	1	94.45	2.4e-06	D	LAIVKFSPNEQNKHIGE	V				ea2d4e20-f1c8-4bb0-82df-cad1c2c9a1c9
1		gi|386830586	glutamyl endopeptidase [Staphylococcus aureus subsp. aureus HO 5096 0412]	233	34942	7	5	5	4	28	1	0	1	925.406	924.398	1	924.455	-0.0568	118	125	0	61.79	0.03	E	QITKYSGE	G				960f1afa-8a47-42e3-8850-a9dfce8e803d
1		gi|386830586	glutamyl endopeptidase [Staphylococcus aureus subsp. aureus HO 5096 0412]	233	34942	7	5	5	4	29	1	0	1	925.447	924.44	1	924.455	-0.0151	118	125	0	65.06	0.016	E	QITKYSGE	G				cee377d9-df4e-4c55-8019-32882229ad81
1		gi|386830586	glutamyl endopeptidase [Staphylococcus aureus subsp. aureus HO 5096 0412]	233	34942	7	5	5	4	82	1	0	1	1223.73	1222.72	1	1222.69	0.0279	180	190	0	69.97	0.0032	E	SKGKITYLKGE	A				582f541f-26ce-44d2-8229-f0b586d21f06
1		gi|386830586	glutamyl endopeptidase [Staphylococcus aureus subsp. aureus HO 5096 0412]	233	34942	7	5	5	4	83	1	0	1	1223.74	1222.73	1	1222.69	0.0362	180	190	0	68	0.0043	E	SKGKITYLKGE	A				326df0d3-5827-4cb4-91ae-fb914585e8ef
1		gi|386830586	glutamyl endopeptidase [Staphylococcus aureus subsp. aureus HO 5096 0412]	233	34942	7	5	5	4	143	1	0	1	1466.72	1465.71	1	1465.67	0.0453	196	210	0	92.39	1e-06	D	LSTTGGNSGSPVFNE	K				762cf3c2-acaa-4156-9d25-b369ec3d0706
1		gi|386830586	glutamyl endopeptidase [Staphylococcus aureus subsp. aureus HO 5096 0412]	233	34942	7	5	5	4	201	1	0	1	1837.88	1836.88	1	1836.85	0.0279	196	213	1	160.28	1.5e-12	D	LSTTGGNSGSPVFNEKNE	V				844dc3b9-3e31-4869-8e8c-2f4c5c8ad61d
1		gi|386830586	glutamyl endopeptidase [Staphylococcus aureus subsp. aureus HO 5096 0412]	233	34942	7	5	5	4	213	1	0	1	1924.09	1923.08	1	1923.02	0.0633	128	144	1	94.45	2.4e-06	D	LAIVKFSPNEQNKHIGE	V				ea2d4e20-f1c8-4bb0-82df-cad1c2c9a1c9
1		gi|487715882	glutamyl endopeptidase [Staphylococcus aureus]	152	27896	8	6	5	4	28	1	0	1	925.406	924.398	1	924.455	-0.0568	137	144	0	61.79	0.03	E	QITKYSGE	G				960f1afa-8a47-42e3-8850-a9dfce8e803d
1		gi|487715882	glutamyl endopeptidase [Staphylococcus aureus]	152	27896	8	6	5	4	29	1	0	1	925.447	924.44	1	924.455	-0.0151	137	144	0	65.06	0.016	E	QITKYSGE	G				cee377d9-df4e-4c55-8019-32882229ad81
1		gi|487715882	glutamyl endopeptidase [Staphylococcus aureus]	152	27896	8	6	5	4	82	1	0	1	1223.73	1222.72	1	1222.69	0.0279	199	209	0	69.97	0.0032	E	SKGKITYLKGE	A				582f541f-26ce-44d2-8229-f0b586d21f06
1		gi|487715882	glutamyl endopeptidase [Staphylococcus aureus]	152	27896	8	6	5	4	83	1	0	1	1223.74	1222.73	1	1222.69	0.0362	199	209	0	68	0.0043	E	SKGKITYLKGE	A				326df0d3-5827-4cb4-91ae-fb914585e8ef
1		gi|487715882	glutamyl endopeptidase [Staphylococcus aureus]	152	27896	8	6	5	4	95	1	0	1	1260.63	1259.63	1	1259.62	0.0095	164	175	0	72.66	0.00011	E	VVKPATMSNNAE	T				331279a2-a32f-4f52-a030-a1bbc440ff21
1		gi|487715882	glutamyl endopeptidase [Staphylococcus aureus]	152	27896	8	6	5	4	102	1	0	1	1276.63	1275.62	1	1275.61	0.0092	164	175	0	51.42	0.0039	E	VVKPATMSNNAE	T	Oxidation (M)	0.000000100000.0		8a30e1cb-b5da-4f72-b3bf-b14d61a1f800
1		gi|487715882	glutamyl endopeptidase [Staphylococcus aureus]	152	27896	8	6	5	4	143	1	0	1	1466.72	1465.71	1	1465.67	0.0453	215	229	0	92.39	1e-06	D	LSTTGGNSGSPVFNE	K				762cf3c2-acaa-4156-9d25-b369ec3d0706
1		gi|487715882	glutamyl endopeptidase [Staphylococcus aureus]	152	27896	8	6	5	4	213	1	0	1	1924.09	1923.08	1	1923.02	0.0633	147	163	1	94.45	2.4e-06	D	LAIVKFSPNEQNKHIGE	V				ea2d4e20-f1c8-4bb0-82df-cad1c2c9a1c9
1		gi|446599217	glutamyl endopeptidase [Staphylococcus aureus]	152	38731	8	6	5	4	28	1	0	1	925.406	924.398	1	924.455	-0.0568	152	159	0	61.79	0.03	E	QITKYSGE	G				960f1afa-8a47-42e3-8850-a9dfce8e803d
1		gi|446599217	glutamyl endopeptidase [Staphylococcus aureus]	152	38731	8	6	5	4	29	1	0	1	925.447	924.44	1	924.455	-0.0151	152	159	0	65.06	0.016	E	QITKYSGE	G				cee377d9-df4e-4c55-8019-32882229ad81
1		gi|446599217	glutamyl endopeptidase [Staphylococcus aureus]	152	38731	8	6	5	4	82	1	0	1	1223.73	1222.72	1	1222.69	0.0279	214	224	0	69.97	0.0032	E	SKGKITYLKGE	A				582f541f-26ce-44d2-8229-f0b586d21f06
1		gi|446599217	glutamyl endopeptidase [Staphylococcus aureus]	152	38731	8	6	5	4	83	1	0	1	1223.74	1222.73	1	1222.69	0.0362	214	224	0	68	0.0043	E	SKGKITYLKGE	A				326df0d3-5827-4cb4-91ae-fb914585e8ef
1		gi|446599217	glutamyl endopeptidase [Staphylococcus aureus]	152	38731	8	6	5	4	95	1	0	1	1260.63	1259.63	1	1259.62	0.0095	179	190	0	72.66	0.00011	E	VVKPATMSNNAE	T				331279a2-a32f-4f52-a030-a1bbc440ff21
1		gi|446599217	glutamyl endopeptidase [Staphylococcus aureus]	152	38731	8	6	5	4	102	1	0	1	1276.63	1275.62	1	1275.61	0.0092	179	190	0	51.42	0.0039	E	VVKPATMSNNAE	T	Oxidation (M)	0.000000100000.0		8a30e1cb-b5da-4f72-b3bf-b14d61a1f800
1		gi|446599217	glutamyl endopeptidase [Staphylococcus aureus]	152	38731	8	6	5	4	181	1	0	1	1660.74	1659.74	1	1659.69	0.0487	330	344	1	97.27	1.3e-06	D	NPNNPDQPNNPNNPD	N				9990cafb-10c0-40c8-8c10-0375019d465f
1		gi|446599217	glutamyl endopeptidase [Staphylococcus aureus]	152	38731	8	6	5	4	213	1	0	1	1924.09	1923.08	1	1923.02	0.0633	162	178	1	94.45	2.4e-06	D	LAIVKFSPNEQNKHIGE	V				ea2d4e20-f1c8-4bb0-82df-cad1c2c9a1c9
1		gi|446599188	glutamyl endopeptidase [Staphylococcus aureus]	116	36981	7	5	4	3	28	1	0	1	925.406	924.398	1	924.455	-0.0568	152	159	0	61.79	0.03	E	QITKYSGE	G				960f1afa-8a47-42e3-8850-a9dfce8e803d
1		gi|446599188	glutamyl endopeptidase [Staphylococcus aureus]	116	36981	7	5	4	3	29	1	0	1	925.447	924.44	1	924.455	-0.0151	152	159	0	65.06	0.016	E	QITKYSGE	G				cee377d9-df4e-4c55-8019-32882229ad81
1		gi|446599188	glutamyl endopeptidase [Staphylococcus aureus]	116	36981	7	5	4	3	82	1	0	1	1223.73	1222.72	1	1222.69	0.0279	214	224	0	69.97	0.0032	E	SKGKITYLKGE	A				582f541f-26ce-44d2-8229-f0b586d21f06
1		gi|446599188	glutamyl endopeptidase [Staphylococcus aureus]	116	36981	7	5	4	3	83	1	0	1	1223.74	1222.73	1	1222.69	0.0362	214	224	0	68	0.0043	E	SKGKITYLKGE	A				326df0d3-5827-4cb4-91ae-fb914585e8ef
1		gi|446599188	glutamyl endopeptidase [Staphylococcus aureus]	116	36981	7	5	4	3	95	1	0	1	1260.63	1259.63	1	1259.62	0.0095	179	190	0	72.66	0.00011	E	VVKPATMSNNAE	T				331279a2-a32f-4f52-a030-a1bbc440ff21
1		gi|446599188	glutamyl endopeptidase [Staphylococcus aureus]	116	36981	7	5	4	3	102	1	0	1	1276.63	1275.62	1	1275.61	0.0092	179	190	0	51.42	0.0039	E	VVKPATMSNNAE	T	Oxidation (M)	0.000000100000.0		8a30e1cb-b5da-4f72-b3bf-b14d61a1f800
1		gi|446599188	glutamyl endopeptidase [Staphylococcus aureus]	116	36981	7	5	4	3	213	1	0	1	1924.09	1923.08	1	1923.02	0.0633	162	178	1	94.45	2.4e-06	D	LAIVKFSPNEQNKHIGE	V				ea2d4e20-f1c8-4bb0-82df-cad1c2c9a1c9
1		gi|379795421	glutamyl endopeptidase [Staphylococcus aureus subsp. aureus MSHR1132]	82	36887	4	4	2	2	82	1	0	1	1223.73	1222.72	1	1222.69	0.0279	214	224	0	69.97	0.0032	E	SKGKITYLKGE	A				582f541f-26ce-44d2-8229-f0b586d21f06
1		gi|379795421	glutamyl endopeptidase [Staphylococcus aureus subsp. aureus MSHR1132]	82	36887	4	4	2	2	83	1	0	1	1223.74	1222.73	1	1222.69	0.0362	214	224	0	68	0.0043	E	SKGKITYLKGE	A				326df0d3-5827-4cb4-91ae-fb914585e8ef
1		gi|379795421	glutamyl endopeptidase [Staphylococcus aureus subsp. aureus MSHR1132]	82	36887	4	4	2	2	95	1	0	1	1260.63	1259.63	1	1259.62	0.0095	179	190	0	72.66	0.00011	E	VVKPATMSNNAE	T				331279a2-a32f-4f52-a030-a1bbc440ff21
1		gi|379795421	glutamyl endopeptidase [Staphylococcus aureus subsp. aureus MSHR1132]	82	36887	4	4	2	2	102	1	0	1	1276.63	1275.62	1	1275.61	0.0092	179	190	0	51.42	0.0039	E	VVKPATMSNNAE	T	Oxidation (M)	0.000000100000.0		8a30e1cb-b5da-4f72-b3bf-b14d61a1f800
2	1	gi|155663	green-fluorescent protein [Aequorea victoria]	86	27017	2	2	1	1	124	1	1	1	1364.61	1363.6	1	1363.61	-0.0063	223	235	1	54.11	0.0038	E	FVTAAGITHGMDE	L	Oxidation (M)	0.0000000000100.0		5e5f3c8f-d7f5-4e27-90c5-fa46a7a7bfb0
2	1	gi|155663	green-fluorescent protein [Aequorea victoria]	86	27017	2	2	1	1	125	1	1	1	1364.67	1363.66	1	1363.61	0.0546	223	235	1	92.54	3e-05	E	FVTAAGITHGMDE	L	Oxidation (M)	0.0000000000100.0		cece96fa-5566-4eb5-9183-8d493e16983d
3	1	gi|15924037	cysteine protease [Staphylococcus aureus subsp. aureus Mu50]	83	44681	1	1	1	1	168	1	1	1	1580.81	1579.8	1	1579.74	0.0619	292	304	1	82.94	8.2e-05	E	YGKSQGRDIHYQE	G				c96ce00e-4bf2-44ed-a28e-8fb44397f083

## Sheet: Sheet5- SpGFP 01 Trypsin digest
LC-MALDI analysis of SpGFP 01 isolated from chloroplasts and digested with Trypsin
Database	NCBInr
Fasta file	NCBInr_20131113.fasta
Total sequences	34201960
Total residues	12001222213
Sequences after taxonomy filter	34201960
Number of queries	376
Number of matches above identity threshold in search of real database	25
Number of matches above identity threshold in search of decoy database	0
Number of matches above homology threshold in search of real database	32
Number of matches above homology threshold in search of decoy database	0
Fixed modifications
Identifier	Name	Delta	Neutral loss
1	Carbamidomethyl (C)	57.0215
Variable modifications
Identifier	Name	Delta	Neutral loss(es)
1	Oxidation (M)	15.9949	0	63.9983
Search Parameters
Taxonomy filter	All entries
Enzyme	Trypsin
Maximum Missed Cleavages	1
Fixed modifications	Carbamidomethyl (C)
Variable modifications	Oxidation (M)
Peptide Mass Tolerance	100
Peptide Mass Tolerance Units	ppm
Fragment Mass Tolerance	0.75
Fragment Mass Tolerance Units	Da
Mass values	Monoisotopic
Instrument type	MALDI-TOF-TOF
Decoy database also searched	1
USER00	PEP_INT()
Format parameters
Significance threshold	0.01825
Max. number of hits	0
Use MudPIT protein scoring	1
Ions score cut-off	0.1
Include same-set proteins	0
Include sub-set proteins	1
Include unassigned	0
Require bold red	0
Use homology threshold	1
Group protein families	1
Re-score using Percolator	0
Protein hits
prot_hit_num	prot_family_member	prot_acc	prot_desc	prot_score	prot_mass	prot_matches	prot_matches_sig	prot_sequences	prot_sequences_sig	pep_query	pep_rank	pep_isbold	pep_isunique	pep_exp_mz	pep_exp_mr	pep_exp_z	pep_calc_mr	pep_delta	pep_start	pep_end	pep_miss	pep_score	pep_expect	pep_res_before	pep_seq	pep_res_after	pep_var_mod	pep_var_mod_pos	pep_summed_mod_pos	pep_scan_title
1	1	gi|312370113	ribulose-1,5-bisphosphate carboxylase/oxygenase large subunit [Anisodus tanguticus]	303	51531	13	10	10	9	70	1	1	0	1021.58	1020.58	1	1020.52	0.0536	15	23	0	77.84	0.00083	K	DTDILAAFR	V				84d29dc6-368b-4900-bd77-c856650145f7
1	1	gi|312370113	ribulose-1,5-bisphosphate carboxylase/oxygenase large subunit [Anisodus tanguticus]	303	51531	13	10	10	9	71	1	1	1	1023.46	1022.45	1	1022.43	0.019	333	340	0	50.68	0.092	R	DDFVEQDR	S				bffdb68b-84c5-40f5-a550-eb469cc6c48d
1	1	gi|312370113	ribulose-1,5-bisphosphate carboxylase/oxygenase large subunit [Anisodus tanguticus]	303	51531	13	10	10	9	72	1	1	1	1023.46	1022.45	1	1022.43	0.0206	333	340	0	48.87	0.091	R	DDFVEQDR	S				5f44fb3d-87a9-437e-8b6e-907154a5b7b8
1	1	gi|312370113	ribulose-1,5-bisphosphate carboxylase/oxygenase large subunit [Anisodus tanguticus]	303	51531	13	10	10	9	115	1	1	1	1257.69	1256.69	1	1256.64	0.0503	418	428	0	95.97	1.4e-05	R	DLAQEGNEIIR	E				bcc600e8-1e0b-4157-b229-5a5a2d1d6899
1	1	gi|312370113	ribulose-1,5-bisphosphate carboxylase/oxygenase large subunit [Anisodus tanguticus]	303	51531	13	10	10	9	116	5	1	0	1261.66	1260.65	1	1260.62	0.0335	200	209	0	75.01	0.0017	R	FLFCAEAIYK	A				208f2f60-1cbb-4e5b-ba4a-a0138d994a65
1	1	gi|312370113	ribulose-1,5-bisphosphate carboxylase/oxygenase large subunit [Anisodus tanguticus]	303	51531	13	10	10	9	117	2	1	0	1261.75	1260.74	1	1260.71	0.0344	322	332	0	101.85	2.6e-06	R	DITLGFVDLLR	D				aa688366-6c2a-4175-bf1c-50be13a24142
1	1	gi|312370113	ribulose-1,5-bisphosphate carboxylase/oxygenase large subunit [Anisodus tanguticus]	303	51531	13	10	10	9	169	1	1	0	1451.6	1450.59	1	1450.61	-0.0268	184	195	0	93.29	1.2e-05	K	DDENVNSQPFMR	W				9add7bb2-334b-4be0-a06a-12b9ae6262a5
1	1	gi|312370113	ribulose-1,5-bisphosphate carboxylase/oxygenase large subunit [Anisodus tanguticus]	303	51531	13	10	10	9	177	1	1	0	1467.59	1466.59	1	1466.61	-0.0243	184	195	0	65.15	0.0069	K	DDENVNSQPFMR	W	Oxidation (M)	0.000000000010.0		8e07f201-6520-4ce6-8f0b-2a0050986e61
1	1	gi|312370113	ribulose-1,5-bisphosphate carboxylase/oxygenase large subunit [Anisodus tanguticus]	303	51531	13	10	10	9	178	1	1	0	1467.62	1466.62	1	1466.61	0.006	184	195	0	48.28	0.043	K	DDENVNSQPFMR	W	Oxidation (M)	0.000000000010.0		ad1d5914-626a-4824-8118-2641481df83c
1	1	gi|312370113	ribulose-1,5-bisphosphate carboxylase/oxygenase large subunit [Anisodus tanguticus]	303	51531	13	10	10	9	190	1	1	0	1497.7	1496.69	1	1496.7	-0.0151	302	316	0	71.08	0.0016	R	MSGGDHIHSGTVVGK	L	Oxidation (M)	0.100000000000000.0		3010fe4d-82cd-4323-934a-cbbcc31a34ee
1	1	gi|312370113	ribulose-1,5-bisphosphate carboxylase/oxygenase large subunit [Anisodus tanguticus]	303	51531	13	10	10	9	202	1	1	0	1546.77	1545.76	1	1545.73	0.0348	433	445	0	91.76	3e-05	K	WSPELAAACEVWK	E				94157d68-1ffb-41d7-be86-fa11548b3061
1	1	gi|312370113	ribulose-1,5-bisphosphate carboxylase/oxygenase large subunit [Anisodus tanguticus]	303	51531	13	10	10	9	212	1	1	1	1579.86	1578.85	1	1578.83	0.0246	446	459	0	101.07	3.3e-06	K	EIVFNFAAVDVLDK	-				9eea579f-21ef-4600-8d7c-d765cc21fcab
1	1	gi|312370113	ribulose-1,5-bisphosphate carboxylase/oxygenase large subunit [Anisodus tanguticus]	303	51531	13	10	10	9	249	1	1	0	1810.88	1809.88	1	1809.8	0.0726	219	234	0	92.55	2.1e-05	K	GHYLNATAGTCEEMIK	R	Oxidation (M)	0.0000000000000100.0		cf4f86cf-da03-466e-86ba-b861b6db9e02
1	2	gi|1448981	ribulose 1,5-bisphosphate carboxylase [Darlingtonia californica]	297	40464	11	10	8	8	116	5	0	0	1261.66	1260.65	1	1260.62	0.0335	103	112	0	75.01	0.0017	R	FLFCAEAIYK	A				208f2f60-1cbb-4e5b-ba4a-a0138d994a65
1	2	gi|1448981	ribulose 1,5-bisphosphate carboxylase [Darlingtonia californica]	297	40464	11	10	8	8	117	2	0	0	1261.75	1260.74	1	1260.71	0.0344	225	235	0	101.85	2.6e-06	R	DITLGFVDLLR	E				aa688366-6c2a-4175-bf1c-50be13a24142
1	2	gi|1448981	ribulose 1,5-bisphosphate carboxylase [Darlingtonia californica]	297	40464	11	10	8	8	144	1	0	1	1315.73	1314.72	1	1314.7	0.0272	2	13	0	61.79	9.4e-05	M	FTSIVGNVFGFK	A				014fece4-4058-40a5-9ee9-4e58a2907960
1	2	gi|1448981	ribulose 1,5-bisphosphate carboxylase [Darlingtonia californica]	297	40464	11	10	8	8	169	1	0	0	1451.6	1450.59	1	1450.61	-0.0268	87	98	0	93.29	1.2e-05	K	DDENVNSQPFMR	W				9add7bb2-334b-4be0-a06a-12b9ae6262a5
1	2	gi|1448981	ribulose 1,5-bisphosphate carboxylase [Darlingtonia californica]	297	40464	11	10	8	8	174	1	0	1	1462.77	1461.76	1	1461.73	0.0269	1	13	0	94.78	1.6e-05	-	MFTSIVGNVFGFK	A	Oxidation (M)	0.1000000000000.0		fe897e45-530a-4e1b-8bcb-c3ca28fba215
1	2	gi|1448981	ribulose 1,5-bisphosphate carboxylase [Darlingtonia californica]	297	40464	11	10	8	8	175	1	0	1	1462.77	1461.76	1	1461.73	0.0294	1	13	0	77.85	4.1e-05	-	MFTSIVGNVFGFK	A	Oxidation (M)	0.1000000000000.0		c4806180-14c9-4abe-8c44-16d22e727aff
1	2	gi|1448981	ribulose 1,5-bisphosphate carboxylase [Darlingtonia californica]	297	40464	11	10	8	8	177	1	0	0	1467.59	1466.59	1	1466.61	-0.0243	87	98	0	65.15	0.0069	K	DDENVNSQPFMR	W	Oxidation (M)	0.000000000010.0		8e07f201-6520-4ce6-8f0b-2a0050986e61
1	2	gi|1448981	ribulose 1,5-bisphosphate carboxylase [Darlingtonia californica]	297	40464	11	10	8	8	178	1	0	0	1467.62	1466.62	1	1466.61	0.006	87	98	0	48.28	0.043	K	DDENVNSQPFMR	W	Oxidation (M)	0.000000000010.0		ad1d5914-626a-4824-8118-2641481df83c
1	2	gi|1448981	ribulose 1,5-bisphosphate carboxylase [Darlingtonia californica]	297	40464	11	10	8	8	190	1	0	0	1497.7	1496.69	1	1496.7	-0.0151	205	219	0	71.08	0.0016	R	MSGGDHIHSGTVVGK	L	Oxidation (M)	0.100000000000000.0		3010fe4d-82cd-4323-934a-cbbcc31a34ee
1	2	gi|1448981	ribulose 1,5-bisphosphate carboxylase [Darlingtonia californica]	297	40464	11	10	8	8	202	1	0	0	1546.77	1545.76	1	1545.73	0.0348	336	348	0	91.76	3e-05	K	WSPELAAACEVWK	E				94157d68-1ffb-41d7-be86-fa11548b3061
1	2	gi|1448981	ribulose 1,5-bisphosphate carboxylase [Darlingtonia californica]	297	40464	11	10	8	8	249	1	0	0	1810.88	1809.88	1	1809.8	0.0726	122	137	0	92.55	2.1e-05	K	GHYLNATAGTCEEMIK	R	Oxidation (M)	0.0000000000000100.0		cf4f86cf-da03-466e-86ba-b861b6db9e02
1	3	gi|340512226	ribulose-1,5-bisphosphate carboxylase/oxygenase large subunit, partial (chloroplast) [Vicia tetrasperma]	236	46616	6	5	4	4	70	1	0	0	1021.58	1020.58	1	1020.52	0.0536	18	26	0	77.84	0.00083	K	DTDILAAFR	V				84d29dc6-368b-4900-bd77-c856650145f7
1	3	gi|340512226	ribulose-1,5-bisphosphate carboxylase/oxygenase large subunit, partial (chloroplast) [Vicia tetrasperma]	236	46616	6	5	4	4	116	5	0	0	1261.66	1260.65	1	1260.62	0.0335	203	212	0	75.01	0.0017	R	FLFCAEAIYK	S				208f2f60-1cbb-4e5b-ba4a-a0138d994a65
1	3	gi|340512226	ribulose-1,5-bisphosphate carboxylase/oxygenase large subunit, partial (chloroplast) [Vicia tetrasperma]	236	46616	6	5	4	4	169	1	0	0	1451.6	1450.59	1	1450.61	-0.0268	187	198	0	93.29	1.2e-05	K	DDENVNSQPFMR	W				9add7bb2-334b-4be0-a06a-12b9ae6262a5
1	3	gi|340512226	ribulose-1,5-bisphosphate carboxylase/oxygenase large subunit, partial (chloroplast) [Vicia tetrasperma]	236	46616	6	5	4	4	177	1	0	0	1467.59	1466.59	1	1466.61	-0.0243	187	198	0	65.15	0.0069	K	DDENVNSQPFMR	W	Oxidation (M)	0.000000000010.0		8e07f201-6520-4ce6-8f0b-2a0050986e61
1	3	gi|340512226	ribulose-1,5-bisphosphate carboxylase/oxygenase large subunit, partial (chloroplast) [Vicia tetrasperma]	236	46616	6	5	4	4	178	1	0	0	1467.62	1466.62	1	1466.61	0.006	187	198	0	48.28	0.043	K	DDENVNSQPFMR	W	Oxidation (M)	0.000000000010.0		ad1d5914-626a-4824-8118-2641481df83c
1	3	gi|340512226	ribulose-1,5-bisphosphate carboxylase/oxygenase large subunit, partial (chloroplast) [Vicia tetrasperma]	236	46616	6	5	4	4	310	1	0	1	2363.28	2362.28	1	2362.19	0.0826	383	406	0	166.71	9.6e-14	K	SVLQFGGGTLGHPWGNAPGAVANR	V				d1233a9e-6dc9-4009-b1e2-0d1da22d7312
1	4	gi|4206548	ribulose 1,5-bisphosphate carboxylase [Glycosmis pentaphylla]	165	51137	9	6	6	5	70	1	0	0	1021.58	1020.58	1	1020.52	0.0536	18	26	0	77.84	0.00083	K	DTDILAAFR	V				84d29dc6-368b-4900-bd77-c856650145f7
1	4	gi|4206548	ribulose 1,5-bisphosphate carboxylase [Glycosmis pentaphylla]	165	51137	9	6	6	5	71	1	0	1	1023.46	1022.45	1	1022.47	-0.0173	336	343	1	50.68	0.092	R	DDFVEKDR	S				bffdb68b-84c5-40f5-a550-eb469cc6c48d
1	4	gi|4206548	ribulose 1,5-bisphosphate carboxylase [Glycosmis pentaphylla]	165	51137	9	6	6	5	72	1	0	1	1023.46	1022.45	1	1022.47	-0.0157	336	343	1	48.87	0.091	R	DDFVEKDR	S				5f44fb3d-87a9-437e-8b6e-907154a5b7b8
1	4	gi|4206548	ribulose 1,5-bisphosphate carboxylase [Glycosmis pentaphylla]	165	51137	9	6	6	5	116	1	0	1	1261.66	1260.65	1	1260.62	0.0335	203	212	0	77.06	0.0011	R	FIFCAEALYK	A				208f2f60-1cbb-4e5b-ba4a-a0138d994a65
1	4	gi|4206548	ribulose 1,5-bisphosphate carboxylase [Glycosmis pentaphylla]	165	51137	9	6	6	5	169	1	0	0	1451.6	1450.59	1	1450.61	-0.0268	187	198	0	93.29	1.2e-05	K	DDENVNSQPFMR	W				9add7bb2-334b-4be0-a06a-12b9ae6262a5
1	4	gi|4206548	ribulose 1,5-bisphosphate carboxylase [Glycosmis pentaphylla]	165	51137	9	6	6	5	177	1	0	0	1467.59	1466.59	1	1466.61	-0.0243	187	198	0	65.15	0.0069	K	DDENVNSQPFMR	W	Oxidation (M)	0.000000000010.0		8e07f201-6520-4ce6-8f0b-2a0050986e61
1	4	gi|4206548	ribulose 1,5-bisphosphate carboxylase [Glycosmis pentaphylla]	165	51137	9	6	6	5	178	1	0	0	1467.62	1466.62	1	1466.61	0.006	187	198	0	48.28	0.043	K	DDENVNSQPFMR	W	Oxidation (M)	0.000000000010.0		ad1d5914-626a-4824-8118-2641481df83c
1	4	gi|4206548	ribulose 1,5-bisphosphate carboxylase [Glycosmis pentaphylla]	165	51137	9	6	6	5	202	1	0	0	1546.77	1545.76	1	1545.73	0.0348	436	448	0	91.76	3e-05	K	WSPELAAACEVWK	E				94157d68-1ffb-41d7-be86-fa11548b3061
1	4	gi|4206548	ribulose 1,5-bisphosphate carboxylase [Glycosmis pentaphylla]	165	51137	9	6	6	5	203	1	0	1	1554.77	1553.77	1	1553.7	0.0631	257	270	0	69.38	0.0017	R	GGFTANTSLAHYCR	D				c1900375-d25e-4d75-bf12-7ffa3cd63f3c
1	5	gi|511778860	ribulose-1,5-bisphosphate carboxylase/oxygenase large subunit, partial (chloroplast) [Allexis cauliflora]	164	48154	6	5	4	4	70	1	0	0	1021.58	1020.58	1	1020.52	0.0536	22	30	0	77.84	0.00083	K	DTDILAAFR	V				84d29dc6-368b-4900-bd77-c856650145f7
1	5	gi|511778860	ribulose-1,5-bisphosphate carboxylase/oxygenase large subunit, partial (chloroplast) [Allexis cauliflora]	164	48154	6	5	4	4	116	5	0	1	1261.66	1260.65	1	1260.62	0.0335	207	216	0	75.01	0.0017	R	FLFCAEAIYK	S				208f2f60-1cbb-4e5b-ba4a-a0138d994a65
1	5	gi|511778860	ribulose-1,5-bisphosphate carboxylase/oxygenase large subunit, partial (chloroplast) [Allexis cauliflora]	164	48154	6	5	4	4	117	1	0	1	1261.75	1260.74	1	1260.71	0.0344	329	339	0	102.38	2.3e-06	R	DITIGFVDLLR	D				aa688366-6c2a-4175-bf1c-50be13a24142
1	5	gi|511778860	ribulose-1,5-bisphosphate carboxylase/oxygenase large subunit, partial (chloroplast) [Allexis cauliflora]	164	48154	6	5	4	4	169	1	0	0	1451.6	1450.59	1	1450.61	-0.0268	191	202	0	93.29	1.2e-05	K	DDENVNSQPFMR	W				9add7bb2-334b-4be0-a06a-12b9ae6262a5
1	5	gi|511778860	ribulose-1,5-bisphosphate carboxylase/oxygenase large subunit, partial (chloroplast) [Allexis cauliflora]	164	48154	6	5	4	4	177	1	0	0	1467.59	1466.59	1	1466.61	-0.0243	191	202	0	65.15	0.0069	K	DDENVNSQPFMR	W	Oxidation (M)	0.000000000010.0		8e07f201-6520-4ce6-8f0b-2a0050986e61
1	5	gi|511778860	ribulose-1,5-bisphosphate carboxylase/oxygenase large subunit, partial (chloroplast) [Allexis cauliflora]	164	48154	6	5	4	4	178	1	0	0	1467.62	1466.62	1	1466.61	0.006	191	202	0	48.28	0.043	K	DDENVNSQPFMR	W	Oxidation (M)	0.000000000010.0		ad1d5914-626a-4824-8118-2641481df83c
1	6	gi|13548766	ribulose-1,5-bisphosphate carboxylase/oxygenase large subunit [Dacrycarpus dacrydioides]	160	50886	6	5	4	4	169	1	0	0	1451.6	1450.59	1	1450.61	-0.0268	192	203	0	93.29	1.2e-05	K	DDENVNSQPFMR	W				9add7bb2-334b-4be0-a06a-12b9ae6262a5
1	6	gi|13548766	ribulose-1,5-bisphosphate carboxylase/oxygenase large subunit [Dacrycarpus dacrydioides]	160	50886	6	5	4	4	177	1	0	0	1467.59	1466.59	1	1466.61	-0.0243	192	203	0	65.15	0.0069	K	DDENVNSQPFMR	W	Oxidation (M)	0.000000000010.0		8e07f201-6520-4ce6-8f0b-2a0050986e61
1	6	gi|13548766	ribulose-1,5-bisphosphate carboxylase/oxygenase large subunit [Dacrycarpus dacrydioides]	160	50886	6	5	4	4	178	1	0	0	1467.62	1466.62	1	1466.61	0.006	192	203	0	48.28	0.043	K	DDENVNSQPFMR	W	Oxidation (M)	0.000000000010.0		ad1d5914-626a-4824-8118-2641481df83c
1	6	gi|13548766	ribulose-1,5-bisphosphate carboxylase/oxygenase large subunit [Dacrycarpus dacrydioides]	160	50886	6	5	4	4	202	1	0	0	1546.77	1545.76	1	1545.73	0.0348	441	453	0	91.76	3e-05	K	WSPELAAACEVWK	E				94157d68-1ffb-41d7-be86-fa11548b3061
1	6	gi|13548766	ribulose-1,5-bisphosphate carboxylase/oxygenase large subunit [Dacrycarpus dacrydioides]	160	50886	6	5	4	4	249	1	0	0	1810.88	1809.88	1	1809.8	0.0726	227	242	0	92.55	2.1e-05	K	GHYLNATAGTCEEMIK	R	Oxidation (M)	0.0000000000000100.0		cf4f86cf-da03-466e-86ba-b861b6db9e02
1	6	gi|13548766	ribulose-1,5-bisphosphate carboxylase/oxygenase large subunit [Dacrycarpus dacrydioides]	160	50886	6	5	4	4	367	3	0	1	3860.89	3859.88	1	3859.84	0.0398	32	69	0	60.88	0.01	R	VTPQPGVPSEEAGAAVASESSTGTWTTVWTDGLTSLDR	Y				79172f3d-2d55-45e1-bad3-cacd4379aa60
1	7	gi|1834449	ribulose-1,5-bisphosphate carboxylase/oxygenase large subunit [Ipomopsis aggregata]	153	42776	7	6	5	5	70	1	0	0	1021.58	1020.58	1	1020.52	0.0536	26	34	0	77.84	0.00083	K	DTDILAAFR	V				84d29dc6-368b-4900-bd77-c856650145f7
1	7	gi|1834449	ribulose-1,5-bisphosphate carboxylase/oxygenase large subunit [Ipomopsis aggregata]	153	42776	7	6	5	5	116	5	0	0	1261.66	1260.65	1	1260.62	0.0335	211	220	0	75.01	0.0017	R	FLFCAEAIYK	S				208f2f60-1cbb-4e5b-ba4a-a0138d994a65
1	7	gi|1834449	ribulose-1,5-bisphosphate carboxylase/oxygenase large subunit [Ipomopsis aggregata]	153	42776	7	6	5	5	169	1	0	0	1451.6	1450.59	1	1450.61	-0.0268	195	206	0	93.29	1.2e-05	K	DDENVNSQPFMR	W				9add7bb2-334b-4be0-a06a-12b9ae6262a5
1	7	gi|1834449	ribulose-1,5-bisphosphate carboxylase/oxygenase large subunit [Ipomopsis aggregata]	153	42776	7	6	5	5	177	1	0	0	1467.59	1466.59	1	1466.61	-0.0243	195	206	0	65.15	0.0069	K	DDENVNSQPFMR	W	Oxidation (M)	0.000000000010.0		8e07f201-6520-4ce6-8f0b-2a0050986e61
1	7	gi|1834449	ribulose-1,5-bisphosphate carboxylase/oxygenase large subunit [Ipomopsis aggregata]	153	42776	7	6	5	5	178	1	0	0	1467.62	1466.62	1	1466.61	0.006	195	206	0	48.28	0.043	K	DDENVNSQPFMR	W	Oxidation (M)	0.000000000010.0		ad1d5914-626a-4824-8118-2641481df83c
1	7	gi|1834449	ribulose-1,5-bisphosphate carboxylase/oxygenase large subunit [Ipomopsis aggregata]	153	42776	7	6	5	5	190	1	0	0	1497.7	1496.69	1	1496.7	-0.0151	313	327	0	71.08	0.0016	R	MSGGDHIHSGTVVGK	L	Oxidation (M)	0.100000000000000.0		3010fe4d-82cd-4323-934a-cbbcc31a34ee
1	7	gi|1834449	ribulose-1,5-bisphosphate carboxylase/oxygenase large subunit [Ipomopsis aggregata]	153	42776	7	6	5	5	339	1	0	1	2835.48	2834.47	1	2834.45	0.016	354	379	0	64.41	0.00018	R	GIYFTQDWVSLPGVLPVASGGIHVWH	-				edce7b3f-58bf-4e8d-b716-bd3446e2afd0
1	8	gi|373104669	ribulose-1-5-bisphosphate carboxylase/oxygenase, partial (chloroplast) [Sicyos lirae]	147	28973	6	5	4	4	116	5	0	0	1261.66	1260.65	1	1260.62	0.0335	196	205	0	75.01	0.0017	R	FLFCAEAIYK	S				208f2f60-1cbb-4e5b-ba4a-a0138d994a65
1	8	gi|373104669	ribulose-1-5-bisphosphate carboxylase/oxygenase, partial (chloroplast) [Sicyos lirae]	147	28973	6	5	4	4	169	1	0	0	1451.6	1450.59	1	1450.61	-0.0268	180	191	0	93.29	1.2e-05	K	DDENVNSQPFMR	W				9add7bb2-334b-4be0-a06a-12b9ae6262a5
1	8	gi|373104669	ribulose-1-5-bisphosphate carboxylase/oxygenase, partial (chloroplast) [Sicyos lirae]	147	28973	6	5	4	4	177	1	0	0	1467.59	1466.59	1	1466.61	-0.0243	180	191	0	65.15	0.0069	K	DDENVNSQPFMR	W	Oxidation (M)	0.000000000010.0		8e07f201-6520-4ce6-8f0b-2a0050986e61
1	8	gi|373104669	ribulose-1-5-bisphosphate carboxylase/oxygenase, partial (chloroplast) [Sicyos lirae]	147	28973	6	5	4	4	178	1	0	0	1467.62	1466.62	1	1466.61	0.006	180	191	0	48.28	0.043	K	DDENVNSQPFMR	W	Oxidation (M)	0.000000000010.0		ad1d5914-626a-4824-8118-2641481df83c
1	8	gi|373104669	ribulose-1-5-bisphosphate carboxylase/oxygenase, partial (chloroplast) [Sicyos lirae]	147	28973	6	5	4	4	239	1	0	1	1746.83	1745.82	1	1745.81	0.0166	215	230	0	69.69	0.0042	K	GHVLNATAGTCEEMIK	R	Oxidation (M)	0.0000000000000100.0		6ac0cdfc-c186-407c-be7c-aefc1da0d285
1	8	gi|373104669	ribulose-1-5-bisphosphate carboxylase/oxygenase, partial (chloroplast) [Sicyos lirae]	147	28973	6	5	4	4	249	1	0	1	1810.88	1809.88	1	1809.8	0.0726	215	230	0	92.55	2.1e-05	K	GHYLNATAGTCEEMIK	R	Oxidation (M)	0.0000000000000100.0		cf4f86cf-da03-466e-86ba-b861b6db9e02
1	9	gi|371486869	1,5-bisphosphate carboxylase/oxygenase large subunit, partial [Trithuria bibracteata]	119	29923	5	4	3	3	116	5	0	0	1261.66	1260.65	1	1260.62	0.0335	208	217	0	75.01	0.0017	R	FLFCAEAIYK	A				208f2f60-1cbb-4e5b-ba4a-a0138d994a65
1	9	gi|371486869	1,5-bisphosphate carboxylase/oxygenase large subunit, partial [Trithuria bibracteata]	119	29923	5	4	3	3	169	1	0	0	1451.6	1450.59	1	1450.61	-0.0268	192	203	0	93.29	1.2e-05	K	DDENVNSQPFMR	W				9add7bb2-334b-4be0-a06a-12b9ae6262a5
1	9	gi|371486869	1,5-bisphosphate carboxylase/oxygenase large subunit, partial [Trithuria bibracteata]	119	29923	5	4	3	3	177	1	0	0	1467.59	1466.59	1	1466.61	-0.0243	192	203	0	65.15	0.0069	K	DDENVNSQPFMR	W	Oxidation (M)	0.000000000010.0		8e07f201-6520-4ce6-8f0b-2a0050986e61
1	9	gi|371486869	1,5-bisphosphate carboxylase/oxygenase large subunit, partial [Trithuria bibracteata]	119	29923	5	4	3	3	178	1	0	0	1467.62	1466.62	1	1466.61	0.006	192	203	0	48.28	0.043	K	DDENVNSQPFMR	W	Oxidation (M)	0.000000000010.0		ad1d5914-626a-4824-8118-2641481df83c
1	9	gi|371486869	1,5-bisphosphate carboxylase/oxygenase large subunit, partial [Trithuria bibracteata]	119	29923	5	4	3	3	281	1	0	1	2050.03	2049.02	1	2048.99	0.0361	249	267	0	58.88	0.0012	R	ELGVPIVMHDYLTGGFTAN	-	Oxidation (M)	0.0000000100000000000.0		5fe10bff-9cf9-496a-a178-5b7159ed68be
1	10	gi|108796725	ribulose-1,5-bisphosphate carboxylase/oxygenase large subunit [Zygnema circumcarinatum]	118	53089	4	4	4	4	116	5	0	0	1261.66	1260.65	1	1260.62	0.0335	218	227	0	75.01	0.0017	R	FLFCAEAIYK	A				208f2f60-1cbb-4e5b-ba4a-a0138d994a65
1	10	gi|108796725	ribulose-1,5-bisphosphate carboxylase/oxygenase large subunit [Zygnema circumcarinatum]	118	53089	4	4	4	4	190	1	0	0	1497.7	1496.69	1	1496.7	-0.0151	320	334	0	71.08	0.0016	R	MSGGDHIHSGTVVGK	L	Oxidation (M)	0.100000000000000.0		3010fe4d-82cd-4323-934a-cbbcc31a34ee
1	10	gi|108796725	ribulose-1,5-bisphosphate carboxylase/oxygenase large subunit [Zygnema circumcarinatum]	118	53089	4	4	4	4	202	1	0	0	1546.77	1545.76	1	1545.73	0.0348	451	463	0	91.76	3e-05	K	WSPELAAACEVWK	E				94157d68-1ffb-41d7-be86-fa11548b3061
1	10	gi|108796725	ribulose-1,5-bisphosphate carboxylase/oxygenase large subunit [Zygnema circumcarinatum]	118	53089	4	4	4	4	367	1	0	1	3860.89	3859.88	1	3859.82	0.0576	42	79	0	63.68	0.0054	R	MTPQAGVPPEEAGAAVAAESSTGTWTTVWTDGLTSLDR	Y				79172f3d-2d55-45e1-bad3-cacd4379aa60
1	11	gi|21105262	ribulose-1,5-bisphosphate carboxylase/oxygenase large subunit [Isoetes humilior]	113	29339	5	4	3	3	70	1	0	0	1021.58	1020.58	1	1020.52	0.0536	22	30	0	77.84	0.00083	K	DTDILAAFR	M				84d29dc6-368b-4900-bd77-c856650145f7
1	11	gi|21105262	ribulose-1,5-bisphosphate carboxylase/oxygenase large subunit [Isoetes humilior]	113	29339	5	4	3	3	169	1	0	0	1451.6	1450.59	1	1450.61	-0.0268	191	202	0	93.29	1.2e-05	K	DDENVNSQPFMR	W				9add7bb2-334b-4be0-a06a-12b9ae6262a5
1	11	gi|21105262	ribulose-1,5-bisphosphate carboxylase/oxygenase large subunit [Isoetes humilior]	113	29339	5	4	3	3	177	1	0	0	1467.59	1466.59	1	1466.61	-0.0243	191	202	0	65.15	0.0069	K	DDENVNSQPFMR	W	Oxidation (M)	0.000000000010.0		8e07f201-6520-4ce6-8f0b-2a0050986e61
1	11	gi|21105262	ribulose-1,5-bisphosphate carboxylase/oxygenase large subunit [Isoetes humilior]	113	29339	5	4	3	3	178	1	0	0	1467.62	1466.62	1	1466.61	0.006	191	202	0	48.28	0.043	K	DDENVNSQPFMR	W	Oxidation (M)	0.000000000010.0		ad1d5914-626a-4824-8118-2641481df83c
1	11	gi|21105262	ribulose-1,5-bisphosphate carboxylase/oxygenase large subunit [Isoetes humilior]	113	29339	5	4	3	3	193	1	0	1	1502.78	1501.77	1	1501.75	0.0221	248	260	0	45.1	0.0062	R	ELGVPIVMHDYLT	-	Oxidation (M)	0.0000000100000.0		f64694d3-c27a-4e95-aca7-91c9e2ee64ad
1		gi|11465965	ribulose-1,5-bisphosphate carboxylase/oxygenase large subunit [Nicotiana tabacum]	292	53378	12	9	9	8	70	1	0	0	1021.58	1020.58	1	1020.52	0.0536	33	41	0	77.84	0.00083	K	DTDILAAFR	V				84d29dc6-368b-4900-bd77-c856650145f7
1		gi|11465965	ribulose-1,5-bisphosphate carboxylase/oxygenase large subunit [Nicotiana tabacum]	292	53378	12	9	9	8	71	1	0	1	1023.46	1022.45	1	1022.43	0.019	351	358	0	50.68	0.092	R	DDFVEQDR	S				bffdb68b-84c5-40f5-a550-eb469cc6c48d
1		gi|11465965	ribulose-1,5-bisphosphate carboxylase/oxygenase large subunit [Nicotiana tabacum]	292	53378	12	9	9	8	72	1	0	1	1023.46	1022.45	1	1022.43	0.0206	351	358	0	48.87	0.091	R	DDFVEQDR	S				5f44fb3d-87a9-437e-8b6e-907154a5b7b8
1		gi|11465965	ribulose-1,5-bisphosphate carboxylase/oxygenase large subunit [Nicotiana tabacum]	292	53378	12	9	9	8	115	1	0	1	1257.69	1256.69	1	1256.64	0.0503	436	446	0	95.97	1.4e-05	R	DLAQEGNEIIR	E				bcc600e8-1e0b-4157-b229-5a5a2d1d6899
1		gi|11465965	ribulose-1,5-bisphosphate carboxylase/oxygenase large subunit [Nicotiana tabacum]	292	53378	12	9	9	8	117	2	0	0	1261.75	1260.74	1	1260.71	0.0344	340	350	0	101.85	2.6e-06	R	DITLGFVDLLR	D				aa688366-6c2a-4175-bf1c-50be13a24142
1		gi|11465965	ribulose-1,5-bisphosphate carboxylase/oxygenase large subunit [Nicotiana tabacum]	292	53378	12	9	9	8	169	1	0	0	1451.6	1450.59	1	1450.61	-0.0268	202	213	0	93.29	1.2e-05	K	DDENVNSQPFMR	W				9add7bb2-334b-4be0-a06a-12b9ae6262a5
1		gi|11465965	ribulose-1,5-bisphosphate carboxylase/oxygenase large subunit [Nicotiana tabacum]	292	53378	12	9	9	8	177	1	0	0	1467.59	1466.59	1	1466.61	-0.0243	202	213	0	65.15	0.0069	K	DDENVNSQPFMR	W	Oxidation (M)	0.000000000010.0		8e07f201-6520-4ce6-8f0b-2a0050986e61
1		gi|11465965	ribulose-1,5-bisphosphate carboxylase/oxygenase large subunit [Nicotiana tabacum]	292	53378	12	9	9	8	178	1	0	0	1467.62	1466.62	1	1466.61	0.006	202	213	0	48.28	0.043	K	DDENVNSQPFMR	W	Oxidation (M)	0.000000000010.0		ad1d5914-626a-4824-8118-2641481df83c
1		gi|11465965	ribulose-1,5-bisphosphate carboxylase/oxygenase large subunit [Nicotiana tabacum]	292	53378	12	9	9	8	190	1	0	0	1497.7	1496.69	1	1496.7	-0.0151	320	334	0	71.08	0.0016	R	MSGGDHIHSGTVVGK	L	Oxidation (M)	0.100000000000000.0		3010fe4d-82cd-4323-934a-cbbcc31a34ee
1		gi|11465965	ribulose-1,5-bisphosphate carboxylase/oxygenase large subunit [Nicotiana tabacum]	292	53378	12	9	9	8	202	1	0	0	1546.77	1545.76	1	1545.73	0.0348	451	463	0	91.76	3e-05	K	WSPELAAACEVWK	E				94157d68-1ffb-41d7-be86-fa11548b3061
1		gi|11465965	ribulose-1,5-bisphosphate carboxylase/oxygenase large subunit [Nicotiana tabacum]	292	53378	12	9	9	8	212	1	0	1	1579.86	1578.85	1	1578.83	0.0246	464	477	0	101.07	3.3e-06	K	EIVFNFAAVDVLDK	-				9eea579f-21ef-4600-8d7c-d765cc21fcab
1		gi|11465965	ribulose-1,5-bisphosphate carboxylase/oxygenase large subunit [Nicotiana tabacum]	292	53378	12	9	9	8	249	1	0	0	1810.88	1809.88	1	1809.8	0.0726	237	252	0	92.55	2.1e-05	K	GHYLNATAGTCEEMIK	R	Oxidation (M)	0.0000000000000100.0		cf4f86cf-da03-466e-86ba-b861b6db9e02
1		gi|6093933	RecName: Full=Ribulose bisphosphate carboxylase large chain; Short=RuBisCO large subunit	281	52421	11	8	8	7	70	1	0	0	1021.58	1020.58	1	1020.52	0.0536	24	32	0	77.84	0.00083	K	DTDILAAFR	V				84d29dc6-368b-4900-bd77-c856650145f7
1		gi|6093933	RecName: Full=Ribulose bisphosphate carboxylase large chain; Short=RuBisCO large subunit	281	52421	11	8	8	7	71	1	0	1	1023.46	1022.45	1	1022.43	0.019	342	349	0	50.68	0.092	R	DDFVEQDR	S				bffdb68b-84c5-40f5-a550-eb469cc6c48d
1		gi|6093933	RecName: Full=Ribulose bisphosphate carboxylase large chain; Short=RuBisCO large subunit	281	52421	11	8	8	7	72	1	0	1	1023.46	1022.45	1	1022.43	0.0206	342	349	0	48.87	0.091	R	DDFVEQDR	S				5f44fb3d-87a9-437e-8b6e-907154a5b7b8
1		gi|6093933	RecName: Full=Ribulose bisphosphate carboxylase large chain; Short=RuBisCO large subunit	281	52421	11	8	8	7	115	1	0	1	1257.69	1256.69	1	1256.64	0.0503	427	437	0	95.97	1.4e-05	R	DLAQEGNEIIR	E				bcc600e8-1e0b-4157-b229-5a5a2d1d6899
1		gi|6093933	RecName: Full=Ribulose bisphosphate carboxylase large chain; Short=RuBisCO large subunit	281	52421	11	8	8	7	117	2	0	0	1261.75	1260.74	1	1260.71	0.0344	331	341	0	101.85	2.6e-06	R	DITLGFVDLLR	D				aa688366-6c2a-4175-bf1c-50be13a24142
1		gi|6093933	RecName: Full=Ribulose bisphosphate carboxylase large chain; Short=RuBisCO large subunit	281	52421	11	8	8	7	169	1	0	0	1451.6	1450.59	1	1450.61	-0.0268	193	204	0	93.29	1.2e-05	K	DDENVNSQPFMR	W				9add7bb2-334b-4be0-a06a-12b9ae6262a5
1		gi|6093933	RecName: Full=Ribulose bisphosphate carboxylase large chain; Short=RuBisCO large subunit	281	52421	11	8	8	7	177	1	0	0	1467.59	1466.59	1	1466.61	-0.0243	193	204	0	65.15	0.0069	K	DDENVNSQPFMR	W	Oxidation (M)	0.000000000010.0		8e07f201-6520-4ce6-8f0b-2a0050986e61
1		gi|6093933	RecName: Full=Ribulose bisphosphate carboxylase large chain; Short=RuBisCO large subunit	281	52421	11	8	8	7	178	1	0	0	1467.62	1466.62	1	1466.61	0.006	193	204	0	48.28	0.043	K	DDENVNSQPFMR	W	Oxidation (M)	0.000000000010.0		ad1d5914-626a-4824-8118-2641481df83c
1		gi|6093933	RecName: Full=Ribulose bisphosphate carboxylase large chain; Short=RuBisCO large subunit	281	52421	11	8	8	7	202	1	0	0	1546.77	1545.76	1	1545.73	0.0348	442	454	0	91.76	3e-05	K	WSPELAAACEVWK	E				94157d68-1ffb-41d7-be86-fa11548b3061
1		gi|6093933	RecName: Full=Ribulose bisphosphate carboxylase large chain; Short=RuBisCO large subunit	281	52421	11	8	8	7	212	1	0	1	1579.86	1578.85	1	1578.83	0.0246	455	468	0	101.07	3.3e-06	K	EIVFNFAAVDVLDK	-				9eea579f-21ef-4600-8d7c-d765cc21fcab
1		gi|6093933	RecName: Full=Ribulose bisphosphate carboxylase large chain; Short=RuBisCO large subunit	281	52421	11	8	8	7	249	1	0	0	1810.88	1809.88	1	1809.8	0.0726	228	243	0	92.55	2.1e-05	K	GHYLNATAGTCEEMIK	R	Oxidation (M)	0.0000000000000100.0		cf4f86cf-da03-466e-86ba-b861b6db9e02
1		gi|38231196	ribulose-1,5-bisphosphate carboxylase/oxygenase large subunit [Chloroplast transformation vector pN-IC101]	278	47391	11	8	8	7	71	1	0	1	1023.46	1022.45	1	1022.43	0.019	296	303	0	50.68	0.092	R	DDFVEQDR	S				bffdb68b-84c5-40f5-a550-eb469cc6c48d
1		gi|38231196	ribulose-1,5-bisphosphate carboxylase/oxygenase large subunit [Chloroplast transformation vector pN-IC101]	278	47391	11	8	8	7	72	1	0	1	1023.46	1022.45	1	1022.43	0.0206	296	303	0	48.87	0.091	R	DDFVEQDR	S				5f44fb3d-87a9-437e-8b6e-907154a5b7b8
1		gi|38231196	ribulose-1,5-bisphosphate carboxylase/oxygenase large subunit [Chloroplast transformation vector pN-IC101]	278	47391	11	8	8	7	115	1	0	1	1257.69	1256.69	1	1256.64	0.0503	381	391	0	95.97	1.4e-05	R	DLAQEGNEIIR	E				bcc600e8-1e0b-4157-b229-5a5a2d1d6899
1		gi|38231196	ribulose-1,5-bisphosphate carboxylase/oxygenase large subunit [Chloroplast transformation vector pN-IC101]	278	47391	11	8	8	7	117	2	0	0	1261.75	1260.74	1	1260.71	0.0344	285	295	0	101.85	2.6e-06	R	DITLGFVDLLR	D				aa688366-6c2a-4175-bf1c-50be13a24142
1		gi|38231196	ribulose-1,5-bisphosphate carboxylase/oxygenase large subunit [Chloroplast transformation vector pN-IC101]	278	47391	11	8	8	7	169	1	0	0	1451.6	1450.59	1	1450.61	-0.0268	147	158	0	93.29	1.2e-05	K	DDENVNSQPFMR	W				9add7bb2-334b-4be0-a06a-12b9ae6262a5
1		gi|38231196	ribulose-1,5-bisphosphate carboxylase/oxygenase large subunit [Chloroplast transformation vector pN-IC101]	278	47391	11	8	8	7	177	1	0	0	1467.59	1466.59	1	1466.61	-0.0243	147	158	0	65.15	0.0069	K	DDENVNSQPFMR	W	Oxidation (M)	0.000000000010.0		8e07f201-6520-4ce6-8f0b-2a0050986e61
1		gi|38231196	ribulose-1,5-bisphosphate carboxylase/oxygenase large subunit [Chloroplast transformation vector pN-IC101]	278	47391	11	8	8	7	178	1	0	0	1467.62	1466.62	1	1466.61	0.006	147	158	0	48.28	0.043	K	DDENVNSQPFMR	W	Oxidation (M)	0.000000000010.0		ad1d5914-626a-4824-8118-2641481df83c
1		gi|38231196	ribulose-1,5-bisphosphate carboxylase/oxygenase large subunit [Chloroplast transformation vector pN-IC101]	278	47391	11	8	8	7	190	1	0	0	1497.7	1496.69	1	1496.7	-0.0151	265	279	0	71.08	0.0016	R	MSGGDHIHSGTVVGK	L	Oxidation (M)	0.100000000000000.0		3010fe4d-82cd-4323-934a-cbbcc31a34ee
1		gi|38231196	ribulose-1,5-bisphosphate carboxylase/oxygenase large subunit [Chloroplast transformation vector pN-IC101]	278	47391	11	8	8	7	202	1	0	0	1546.77	1545.76	1	1545.73	0.0348	396	408	0	91.76	3e-05	K	WSPELAAACEVWK	E				94157d68-1ffb-41d7-be86-fa11548b3061
1		gi|38231196	ribulose-1,5-bisphosphate carboxylase/oxygenase large subunit [Chloroplast transformation vector pN-IC101]	278	47391	11	8	8	7	212	1	0	1	1579.86	1578.85	1	1578.83	0.0246	409	422	0	101.07	3.3e-06	K	EIVFNFAAVDVLDK	-				9eea579f-21ef-4600-8d7c-d765cc21fcab
1		gi|38231196	ribulose-1,5-bisphosphate carboxylase/oxygenase large subunit [Chloroplast transformation vector pN-IC101]	278	47391	11	8	8	7	249	1	0	0	1810.88	1809.88	1	1809.8	0.0726	182	197	0	92.55	2.1e-05	K	GHYLNATAGTCEEMIK	R	Oxidation (M)	0.0000000000000100.0		cf4f86cf-da03-466e-86ba-b861b6db9e02
1		gi|132000	RecName: Full=Ribulose bisphosphate carboxylase large chain; Short=RuBisCO large subunit; Flags: Precursor	274	53421	12	9	9	8	70	1	0	0	1021.58	1020.58	1	1020.52	0.0536	33	41	0	77.84	0.00083	K	DTDILAAFR	V				84d29dc6-368b-4900-bd77-c856650145f7
1		gi|132000	RecName: Full=Ribulose bisphosphate carboxylase large chain; Short=RuBisCO large subunit; Flags: Precursor	274	53421	12	9	9	8	71	1	0	1	1023.46	1022.45	1	1022.43	0.019	351	358	0	50.68	0.092	R	DDFVEQDR	S				bffdb68b-84c5-40f5-a550-eb469cc6c48d
1		gi|132000	RecName: Full=Ribulose bisphosphate carboxylase large chain; Short=RuBisCO large subunit; Flags: Precursor	274	53421	12	9	9	8	72	1	0	1	1023.46	1022.45	1	1022.43	0.0206	351	358	0	48.87	0.091	R	DDFVEQDR	S				5f44fb3d-87a9-437e-8b6e-907154a5b7b8
1		gi|132000	RecName: Full=Ribulose bisphosphate carboxylase large chain; Short=RuBisCO large subunit; Flags: Precursor	274	53421	12	9	9	8	115	1	0	1	1257.69	1256.69	1	1256.64	0.0503	436	446	0	95.97	1.4e-05	R	DLAQEGNEIIR	E				bcc600e8-1e0b-4157-b229-5a5a2d1d6899
1		gi|132000	RecName: Full=Ribulose bisphosphate carboxylase large chain; Short=RuBisCO large subunit; Flags: Precursor	274	53421	12	9	9	8	116	5	0	0	1261.66	1260.65	1	1260.62	0.0335	218	227	0	75.01	0.0017	R	FLFCAEAIYK	A				208f2f60-1cbb-4e5b-ba4a-a0138d994a65
1		gi|132000	RecName: Full=Ribulose bisphosphate carboxylase large chain; Short=RuBisCO large subunit; Flags: Precursor	274	53421	12	9	9	8	117	2	0	0	1261.75	1260.74	1	1260.71	0.0344	340	350	0	101.85	2.6e-06	R	DITLGFVDLLR	D				aa688366-6c2a-4175-bf1c-50be13a24142
1		gi|132000	RecName: Full=Ribulose bisphosphate carboxylase large chain; Short=RuBisCO large subunit; Flags: Precursor	274	53421	12	9	9	8	169	1	0	0	1451.6	1450.59	1	1450.61	-0.0268	202	213	0	93.29	1.2e-05	K	DDENVNSQPFMR	W				9add7bb2-334b-4be0-a06a-12b9ae6262a5
1		gi|132000	RecName: Full=Ribulose bisphosphate carboxylase large chain; Short=RuBisCO large subunit; Flags: Precursor	274	53421	12	9	9	8	177	1	0	0	1467.59	1466.59	1	1466.61	-0.0243	202	213	0	65.15	0.0069	K	DDENVNSQPFMR	W	Oxidation (M)	0.000000000010.0		8e07f201-6520-4ce6-8f0b-2a0050986e61
1		gi|132000	RecName: Full=Ribulose bisphosphate carboxylase large chain; Short=RuBisCO large subunit; Flags: Precursor	274	53421	12	9	9	8	178	1	0	0	1467.62	1466.62	1	1466.61	0.006	202	213	0	48.28	0.043	K	DDENVNSQPFMR	W	Oxidation (M)	0.000000000010.0		ad1d5914-626a-4824-8118-2641481df83c
1		gi|132000	RecName: Full=Ribulose bisphosphate carboxylase large chain; Short=RuBisCO large subunit; Flags: Precursor	274	53421	12	9	9	8	190	1	0	0	1497.7	1496.69	1	1496.7	-0.0151	320	334	0	71.08	0.0016	R	MSGGDHIHSGTVVGK	L	Oxidation (M)	0.100000000000000.0		3010fe4d-82cd-4323-934a-cbbcc31a34ee
1		gi|132000	RecName: Full=Ribulose bisphosphate carboxylase large chain; Short=RuBisCO large subunit; Flags: Precursor	274	53421	12	9	9	8	212	1	0	1	1579.86	1578.85	1	1578.83	0.0246	464	477	0	101.07	3.3e-06	K	EIVFNFAAVDVLDK	-				9eea579f-21ef-4600-8d7c-d765cc21fcab
1		gi|132000	RecName: Full=Ribulose bisphosphate carboxylase large chain; Short=RuBisCO large subunit; Flags: Precursor	274	53421	12	9	9	8	249	1	0	0	1810.88	1809.88	1	1809.8	0.0726	237	252	0	92.55	2.1e-05	K	GHYLNATAGTCEEMIK	R	Oxidation (M)	0.0000000000000100.0		cf4f86cf-da03-466e-86ba-b861b6db9e02
1		gi|330414145	ribulose-1,5-bisphosphate carboxylase/oxygenase large subunit [Tocoyena pittieri]	274	40439	9	8	6	6	117	2	0	0	1261.75	1260.74	1	1260.71	0.0344	225	235	0	101.85	2.6e-06	R	DITLGFVDLLR	D				aa688366-6c2a-4175-bf1c-50be13a24142
1		gi|330414145	ribulose-1,5-bisphosphate carboxylase/oxygenase large subunit [Tocoyena pittieri]	274	40439	9	8	6	6	144	1	0	1	1315.73	1314.72	1	1314.7	0.0272	2	13	0	61.79	9.4e-05	M	FTSIVGNVFGFK	A				014fece4-4058-40a5-9ee9-4e58a2907960
1		gi|330414145	ribulose-1,5-bisphosphate carboxylase/oxygenase large subunit [Tocoyena pittieri]	274	40439	9	8	6	6	169	1	0	0	1451.6	1450.59	1	1450.61	-0.0268	87	98	0	93.29	1.2e-05	K	DDENVNSQPFMR	W				9add7bb2-334b-4be0-a06a-12b9ae6262a5
1		gi|330414145	ribulose-1,5-bisphosphate carboxylase/oxygenase large subunit [Tocoyena pittieri]	274	40439	9	8	6	6	174	1	0	1	1462.77	1461.76	1	1461.73	0.0269	1	13	0	94.78	1.6e-05	-	MFTSIVGNVFGFK	A	Oxidation (M)	0.1000000000000.0		fe897e45-530a-4e1b-8bcb-c3ca28fba215
1		gi|330414145	ribulose-1,5-bisphosphate carboxylase/oxygenase large subunit [Tocoyena pittieri]	274	40439	9	8	6	6	175	1	0	1	1462.77	1461.76	1	1461.73	0.0294	1	13	0	77.85	4.1e-05	-	MFTSIVGNVFGFK	A	Oxidation (M)	0.1000000000000.0		c4806180-14c9-4abe-8c44-16d22e727aff
1		gi|330414145	ribulose-1,5-bisphosphate carboxylase/oxygenase large subunit [Tocoyena pittieri]	274	40439	9	8	6	6	177	1	0	0	1467.59	1466.59	1	1466.61	-0.0243	87	98	0	65.15	0.0069	K	DDENVNSQPFMR	W	Oxidation (M)	0.000000000010.0		8e07f201-6520-4ce6-8f0b-2a0050986e61
1		gi|330414145	ribulose-1,5-bisphosphate carboxylase/oxygenase large subunit [Tocoyena pittieri]	274	40439	9	8	6	6	178	1	0	0	1467.62	1466.62	1	1466.61	0.006	87	98	0	48.28	0.043	K	DDENVNSQPFMR	W	Oxidation (M)	0.000000000010.0		ad1d5914-626a-4824-8118-2641481df83c
1		gi|330414145	ribulose-1,5-bisphosphate carboxylase/oxygenase large subunit [Tocoyena pittieri]	274	40439	9	8	6	6	202	1	0	0	1546.77	1545.76	1	1545.73	0.0348	336	348	0	91.76	3e-05	K	WSPELAAACEVWK	A				94157d68-1ffb-41d7-be86-fa11548b3061
1		gi|330414145	ribulose-1,5-bisphosphate carboxylase/oxygenase large subunit [Tocoyena pittieri]	274	40439	9	8	6	6	249	1	0	0	1810.88	1809.88	1	1809.8	0.0726	122	137	0	92.55	2.1e-05	K	GHYLNATAGTCEEMIK	R	Oxidation (M)	0.0000000000000100.0		cf4f86cf-da03-466e-86ba-b861b6db9e02
1		gi|237784001	ribulose-1,5-bisphosphate carboxylase/oxygenase large subunit [Nolana acuminata]	265	51191	12	9	9	8	70	1	0	0	1021.58	1020.58	1	1020.52	0.0536	15	23	0	77.84	0.00083	K	DTDILAAFR	V				84d29dc6-368b-4900-bd77-c856650145f7
1		gi|237784001	ribulose-1,5-bisphosphate carboxylase/oxygenase large subunit [Nolana acuminata]	265	51191	12	9	9	8	71	1	0	1	1023.46	1022.45	1	1022.43	0.019	333	340	0	50.68	0.092	R	DDFVEQDR	S				bffdb68b-84c5-40f5-a550-eb469cc6c48d
1		gi|237784001	ribulose-1,5-bisphosphate carboxylase/oxygenase large subunit [Nolana acuminata]	265	51191	12	9	9	8	72	1	0	1	1023.46	1022.45	1	1022.43	0.0206	333	340	0	48.87	0.091	R	DDFVEQDR	S				5f44fb3d-87a9-437e-8b6e-907154a5b7b8
1		gi|237784001	ribulose-1,5-bisphosphate carboxylase/oxygenase large subunit [Nolana acuminata]	265	51191	12	9	9	8	115	1	0	1	1257.69	1256.69	1	1256.64	0.0503	418	428	0	95.97	1.4e-05	R	DLAQEGNEIIR	E				bcc600e8-1e0b-4157-b229-5a5a2d1d6899
1		gi|237784001	ribulose-1,5-bisphosphate carboxylase/oxygenase large subunit [Nolana acuminata]	265	51191	12	9	9	8	116	5	0	0	1261.66	1260.65	1	1260.62	0.0335	200	209	0	75.01	0.0017	R	FLFCAEAIYK	S				208f2f60-1cbb-4e5b-ba4a-a0138d994a65
1		gi|237784001	ribulose-1,5-bisphosphate carboxylase/oxygenase large subunit [Nolana acuminata]	265	51191	12	9	9	8	117	2	0	0	1261.75	1260.74	1	1260.71	0.0344	322	332	0	101.85	2.6e-06	R	DITLGFVDLLR	D				aa688366-6c2a-4175-bf1c-50be13a24142
1		gi|237784001	ribulose-1,5-bisphosphate carboxylase/oxygenase large subunit [Nolana acuminata]	265	51191	12	9	9	8	169	1	0	0	1451.6	1450.59	1	1450.61	-0.0268	184	195	0	93.29	1.2e-05	K	DDENVNSQPFMR	W				9add7bb2-334b-4be0-a06a-12b9ae6262a5
1		gi|237784001	ribulose-1,5-bisphosphate carboxylase/oxygenase large subunit [Nolana acuminata]	265	51191	12	9	9	8	177	1	0	0	1467.59	1466.59	1	1466.61	-0.0243	184	195	0	65.15	0.0069	K	DDENVNSQPFMR	W	Oxidation (M)	0.000000000010.0		8e07f201-6520-4ce6-8f0b-2a0050986e61
1		gi|237784001	ribulose-1,5-bisphosphate carboxylase/oxygenase large subunit [Nolana acuminata]	265	51191	12	9	9	8	178	1	0	0	1467.62	1466.62	1	1466.61	0.006	184	195	0	48.28	0.043	K	DDENVNSQPFMR	W	Oxidation (M)	0.000000000010.0		ad1d5914-626a-4824-8118-2641481df83c
1		gi|237784001	ribulose-1,5-bisphosphate carboxylase/oxygenase large subunit [Nolana acuminata]	265	51191	12	9	9	8	190	1	0	0	1497.7	1496.69	1	1496.7	-0.0151	302	316	0	71.08	0.0016	R	MSGGDHIHSGTVVGK	L	Oxidation (M)	0.100000000000000.0		3010fe4d-82cd-4323-934a-cbbcc31a34ee
1		gi|237784001	ribulose-1,5-bisphosphate carboxylase/oxygenase large subunit [Nolana acuminata]	265	51191	12	9	9	8	202	1	0	0	1546.77	1545.76	1	1545.73	0.0348	433	445	0	91.76	3e-05	K	WSPELAAACEVWK	E				94157d68-1ffb-41d7-be86-fa11548b3061
1		gi|237784001	ribulose-1,5-bisphosphate carboxylase/oxygenase large subunit [Nolana acuminata]	265	51191	12	9	9	8	249	1	0	0	1810.88	1809.88	1	1809.8	0.0726	219	234	0	92.55	2.1e-05	K	GHYLNATAGTCEEMIK	R	Oxidation (M)	0.0000000000000100.0		cf4f86cf-da03-466e-86ba-b861b6db9e02
1		gi|132001	RecName: Full=Ribulose bisphosphate carboxylase large chain; Short=RuBisCO large subunit; Flags: Precursor	263	53409	11	8	8	7	70	1	0	0	1021.58	1020.58	1	1020.52	0.0536	33	41	0	77.84	0.00083	K	DTDILAAFR	V				84d29dc6-368b-4900-bd77-c856650145f7
1		gi|132001	RecName: Full=Ribulose bisphosphate carboxylase large chain; Short=RuBisCO large subunit; Flags: Precursor	263	53409	11	8	8	7	71	1	0	1	1023.46	1022.45	1	1022.43	0.019	351	358	0	50.68	0.092	R	DDFVEQDR	S				bffdb68b-84c5-40f5-a550-eb469cc6c48d
1		gi|132001	RecName: Full=Ribulose bisphosphate carboxylase large chain; Short=RuBisCO large subunit; Flags: Precursor	263	53409	11	8	8	7	72	1	0	1	1023.46	1022.45	1	1022.43	0.0206	351	358	0	48.87	0.091	R	DDFVEQDR	S				5f44fb3d-87a9-437e-8b6e-907154a5b7b8
1		gi|132001	RecName: Full=Ribulose bisphosphate carboxylase large chain; Short=RuBisCO large subunit; Flags: Precursor	263	53409	11	8	8	7	115	1	0	1	1257.69	1256.69	1	1256.64	0.0503	436	446	0	95.97	1.4e-05	R	DLAQEGNEIIR	E				bcc600e8-1e0b-4157-b229-5a5a2d1d6899
1		gi|132001	RecName: Full=Ribulose bisphosphate carboxylase large chain; Short=RuBisCO large subunit; Flags: Precursor	263	53409	11	8	8	7	117	2	0	0	1261.75	1260.74	1	1260.71	0.0344	340	350	0	101.85	2.6e-06	R	DITLGFVDLLR	D				aa688366-6c2a-4175-bf1c-50be13a24142
1		gi|132001	RecName: Full=Ribulose bisphosphate carboxylase large chain; Short=RuBisCO large subunit; Flags: Precursor	263	53409	11	8	8	7	169	1	0	0	1451.6	1450.59	1	1450.61	-0.0268	202	213	0	93.29	1.2e-05	K	DDENVNSQPFMR	W				9add7bb2-334b-4be0-a06a-12b9ae6262a5
1		gi|132001	RecName: Full=Ribulose bisphosphate carboxylase large chain; Short=RuBisCO large subunit; Flags: Precursor	263	53409	11	8	8	7	177	1	0	0	1467.59	1466.59	1	1466.61	-0.0243	202	213	0	65.15	0.0069	K	DDENVNSQPFMR	W	Oxidation (M)	0.000000000010.0		8e07f201-6520-4ce6-8f0b-2a0050986e61
1		gi|132001	RecName: Full=Ribulose bisphosphate carboxylase large chain; Short=RuBisCO large subunit; Flags: Precursor	263	53409	11	8	8	7	178	1	0	0	1467.62	1466.62	1	1466.61	0.006	202	213	0	48.28	0.043	K	DDENVNSQPFMR	W	Oxidation (M)	0.000000000010.0		ad1d5914-626a-4824-8118-2641481df83c
1		gi|132001	RecName: Full=Ribulose bisphosphate carboxylase large chain; Short=RuBisCO large subunit; Flags: Precursor	263	53409	11	8	8	7	190	1	0	0	1497.7	1496.69	1	1496.7	-0.0151	320	334	0	71.08	0.0016	R	MSGGDHIHSGTVVGK	L	Oxidation (M)	0.100000000000000.0		3010fe4d-82cd-4323-934a-cbbcc31a34ee
1		gi|132001	RecName: Full=Ribulose bisphosphate carboxylase large chain; Short=RuBisCO large subunit; Flags: Precursor	263	53409	11	8	8	7	212	1	0	1	1579.86	1578.85	1	1578.83	0.0246	464	477	0	101.07	3.3e-06	K	EIVFNFAAVDVLDK	-				9eea579f-21ef-4600-8d7c-d765cc21fcab
1		gi|132001	RecName: Full=Ribulose bisphosphate carboxylase large chain; Short=RuBisCO large subunit; Flags: Precursor	263	53409	11	8	8	7	249	1	0	0	1810.88	1809.88	1	1809.8	0.0726	237	252	0	92.55	2.1e-05	K	GHYLNATAGTCEEMIK	R	Oxidation (M)	0.0000000000000100.0		cf4f86cf-da03-466e-86ba-b861b6db9e02
1		gi|1352757	RecName: Full=Ribulose bisphosphate carboxylase large chain; Short=RuBisCO large subunit	260	52372	11	8	8	7	70	1	0	0	1021.58	1020.58	1	1020.52	0.0536	24	32	0	77.84	0.00083	K	DTDILAAFR	V				84d29dc6-368b-4900-bd77-c856650145f7
1		gi|1352757	RecName: Full=Ribulose bisphosphate carboxylase large chain; Short=RuBisCO large subunit	260	52372	11	8	8	7	71	1	0	1	1023.46	1022.45	1	1022.43	0.019	342	349	0	50.68	0.092	R	DDFVEQDR	S				bffdb68b-84c5-40f5-a550-eb469cc6c48d
1		gi|1352757	RecName: Full=Ribulose bisphosphate carboxylase large chain; Short=RuBisCO large subunit	260	52372	11	8	8	7	72	1	0	1	1023.46	1022.45	1	1022.43	0.0206	342	349	0	48.87	0.091	R	DDFVEQDR	S				5f44fb3d-87a9-437e-8b6e-907154a5b7b8
1		gi|1352757	RecName: Full=Ribulose bisphosphate carboxylase large chain; Short=RuBisCO large subunit	260	52372	11	8	8	7	117	2	0	0	1261.75	1260.74	1	1260.71	0.0344	331	341	0	101.85	2.6e-06	R	DITLGFVDLLR	D				aa688366-6c2a-4175-bf1c-50be13a24142
1		gi|1352757	RecName: Full=Ribulose bisphosphate carboxylase large chain; Short=RuBisCO large subunit	260	52372	11	8	8	7	169	1	0	0	1451.6	1450.59	1	1450.61	-0.0268	193	204	0	93.29	1.2e-05	K	DDENVNSQPFMR	W				9add7bb2-334b-4be0-a06a-12b9ae6262a5
1		gi|1352757	RecName: Full=Ribulose bisphosphate carboxylase large chain; Short=RuBisCO large subunit	260	52372	11	8	8	7	177	1	0	0	1467.59	1466.59	1	1466.61	-0.0243	193	204	0	65.15	0.0069	K	DDENVNSQPFMR	W	Oxidation (M)	0.000000000010.0		8e07f201-6520-4ce6-8f0b-2a0050986e61
1		gi|1352757	RecName: Full=Ribulose bisphosphate carboxylase large chain; Short=RuBisCO large subunit	260	52372	11	8	8	7	178	1	0	0	1467.62	1466.62	1	1466.61	0.006	193	204	0	48.28	0.043	K	DDENVNSQPFMR	W	Oxidation (M)	0.000000000010.0		ad1d5914-626a-4824-8118-2641481df83c
1		gi|1352757	RecName: Full=Ribulose bisphosphate carboxylase large chain; Short=RuBisCO large subunit	260	52372	11	8	8	7	190	1	0	0	1497.7	1496.69	1	1496.7	-0.0151	311	325	0	71.08	0.0016	R	MSGGDHIHSGTVVGK	L	Oxidation (M)	0.100000000000000.0		3010fe4d-82cd-4323-934a-cbbcc31a34ee
1		gi|1352757	RecName: Full=Ribulose bisphosphate carboxylase large chain; Short=RuBisCO large subunit	260	52372	11	8	8	7	202	1	0	0	1546.77	1545.76	1	1545.73	0.0348	442	454	0	91.76	3e-05	K	WSPELAAACEVWK	E				94157d68-1ffb-41d7-be86-fa11548b3061
1		gi|1352757	RecName: Full=Ribulose bisphosphate carboxylase large chain; Short=RuBisCO large subunit	260	52372	11	8	8	7	212	1	0	1	1579.86	1578.85	1	1578.83	0.0246	455	468	0	101.07	3.3e-06	K	EIVFNFAAVDVLDK	-				9eea579f-21ef-4600-8d7c-d765cc21fcab
1		gi|1352757	RecName: Full=Ribulose bisphosphate carboxylase large chain; Short=RuBisCO large subunit	260	52372	11	8	8	7	249	1	0	0	1810.88	1809.88	1	1809.8	0.0726	228	243	0	92.55	2.1e-05	K	GHYLNATAGTCEEMIK	R	Oxidation (M)	0.0000000000000100.0		cf4f86cf-da03-466e-86ba-b861b6db9e02
1		gi|237784003	ribulose-1,5-bisphosphate carboxylase/oxygenase large subunit [Nolana adansonii]	254	51175	11	8	8	7	70	1	0	0	1021.58	1020.58	1	1020.52	0.0536	15	23	0	77.84	0.00083	K	DTDILAAFR	V				84d29dc6-368b-4900-bd77-c856650145f7
1		gi|237784003	ribulose-1,5-bisphosphate carboxylase/oxygenase large subunit [Nolana adansonii]	254	51175	11	8	8	7	71	1	0	1	1023.46	1022.45	1	1022.43	0.019	333	340	0	50.68	0.092	R	DDFVEQDR	S				bffdb68b-84c5-40f5-a550-eb469cc6c48d
1		gi|237784003	ribulose-1,5-bisphosphate carboxylase/oxygenase large subunit [Nolana adansonii]	254	51175	11	8	8	7	72	1	0	1	1023.46	1022.45	1	1022.43	0.0206	333	340	0	48.87	0.091	R	DDFVEQDR	S				5f44fb3d-87a9-437e-8b6e-907154a5b7b8
1		gi|237784003	ribulose-1,5-bisphosphate carboxylase/oxygenase large subunit [Nolana adansonii]	254	51175	11	8	8	7	115	1	0	1	1257.69	1256.69	1	1256.64	0.0503	418	428	0	95.97	1.4e-05	R	DLAQEGNEIIR	E				bcc600e8-1e0b-4157-b229-5a5a2d1d6899
1		gi|237784003	ribulose-1,5-bisphosphate carboxylase/oxygenase large subunit [Nolana adansonii]	254	51175	11	8	8	7	117	2	0	0	1261.75	1260.74	1	1260.71	0.0344	322	332	0	101.85	2.6e-06	R	DITLGFVDLLR	D				aa688366-6c2a-4175-bf1c-50be13a24142
1		gi|237784003	ribulose-1,5-bisphosphate carboxylase/oxygenase large subunit [Nolana adansonii]	254	51175	11	8	8	7	169	1	0	0	1451.6	1450.59	1	1450.61	-0.0268	184	195	0	93.29	1.2e-05	K	DDENVNSQPFMR	W				9add7bb2-334b-4be0-a06a-12b9ae6262a5
1		gi|237784003	ribulose-1,5-bisphosphate carboxylase/oxygenase large subunit [Nolana adansonii]	254	51175	11	8	8	7	177	1	0	0	1467.59	1466.59	1	1466.61	-0.0243	184	195	0	65.15	0.0069	K	DDENVNSQPFMR	W	Oxidation (M)	0.000000000010.0		8e07f201-6520-4ce6-8f0b-2a0050986e61
1		gi|237784003	ribulose-1,5-bisphosphate carboxylase/oxygenase large subunit [Nolana adansonii]	254	51175	11	8	8	7	178	1	0	0	1467.62	1466.62	1	1466.61	0.006	184	195	0	48.28	0.043	K	DDENVNSQPFMR	W	Oxidation (M)	0.000000000010.0		ad1d5914-626a-4824-8118-2641481df83c
1		gi|237784003	ribulose-1,5-bisphosphate carboxylase/oxygenase large subunit [Nolana adansonii]	254	51175	11	8	8	7	190	1	0	0	1497.7	1496.69	1	1496.7	-0.0151	302	316	0	71.08	0.0016	R	MSGGDHIHSGTVVGK	L	Oxidation (M)	0.100000000000000.0		3010fe4d-82cd-4323-934a-cbbcc31a34ee
1		gi|237784003	ribulose-1,5-bisphosphate carboxylase/oxygenase large subunit [Nolana adansonii]	254	51175	11	8	8	7	202	1	0	0	1546.77	1545.76	1	1545.73	0.0348	433	445	0	91.76	3e-05	K	WSPELAAACEVWK	E				94157d68-1ffb-41d7-be86-fa11548b3061
1		gi|237784003	ribulose-1,5-bisphosphate carboxylase/oxygenase large subunit [Nolana adansonii]	254	51175	11	8	8	7	249	1	0	0	1810.88	1809.88	1	1809.8	0.0726	219	234	0	92.55	2.1e-05	K	GHYLNATAGTCEEMIK	R	Oxidation (M)	0.0000000000000100.0		cf4f86cf-da03-466e-86ba-b861b6db9e02
1		gi|312370121	ribulose-1,5-bisphosphate carboxylase/oxygenase large subunit [Grabowskia boerhaviifolia]	252	51837	8	7	6	6	70	1	0	0	1021.58	1020.58	1	1020.52	0.0536	15	23	0	77.84	0.00083	K	DTDILAAFR	V				84d29dc6-368b-4900-bd77-c856650145f7
1		gi|312370121	ribulose-1,5-bisphosphate carboxylase/oxygenase large subunit [Grabowskia boerhaviifolia]	252	51837	8	7	6	6	115	1	0	1	1257.69	1256.69	1	1256.64	0.0503	418	428	0	95.97	1.4e-05	R	DLAQEGNEIIR	E				bcc600e8-1e0b-4157-b229-5a5a2d1d6899
1		gi|312370121	ribulose-1,5-bisphosphate carboxylase/oxygenase large subunit [Grabowskia boerhaviifolia]	252	51837	8	7	6	6	117	2	0	0	1261.75	1260.74	1	1260.71	0.0344	322	332	0	101.85	2.6e-06	R	DITLGFVDLLR	D				aa688366-6c2a-4175-bf1c-50be13a24142
1		gi|312370121	ribulose-1,5-bisphosphate carboxylase/oxygenase large subunit [Grabowskia boerhaviifolia]	252	51837	8	7	6	6	169	1	0	0	1451.6	1450.59	1	1450.61	-0.0268	184	195	0	93.29	1.2e-05	K	DDENVNSQPFMR	W				9add7bb2-334b-4be0-a06a-12b9ae6262a5
1		gi|312370121	ribulose-1,5-bisphosphate carboxylase/oxygenase large subunit [Grabowskia boerhaviifolia]	252	51837	8	7	6	6	177	1	0	0	1467.59	1466.59	1	1466.61	-0.0243	184	195	0	65.15	0.0069	K	DDENVNSQPFMR	W	Oxidation (M)	0.000000000010.0		8e07f201-6520-4ce6-8f0b-2a0050986e61
1		gi|312370121	ribulose-1,5-bisphosphate carboxylase/oxygenase large subunit [Grabowskia boerhaviifolia]	252	51837	8	7	6	6	178	1	0	0	1467.62	1466.62	1	1466.61	0.006	184	195	0	48.28	0.043	K	DDENVNSQPFMR	W	Oxidation (M)	0.000000000010.0		ad1d5914-626a-4824-8118-2641481df83c
1		gi|312370121	ribulose-1,5-bisphosphate carboxylase/oxygenase large subunit [Grabowskia boerhaviifolia]	252	51837	8	7	6	6	202	1	0	0	1546.77	1545.76	1	1545.73	0.0348	433	445	0	91.76	3e-05	K	WSPELAAACEVWK	E				94157d68-1ffb-41d7-be86-fa11548b3061
1		gi|312370121	ribulose-1,5-bisphosphate carboxylase/oxygenase large subunit [Grabowskia boerhaviifolia]	252	51837	8	7	6	6	212	1	0	1	1579.86	1578.85	1	1578.83	0.0246	446	459	0	101.07	3.3e-06	K	EIVFNFAAVDVLDK	T				9eea579f-21ef-4600-8d7c-d765cc21fcab
1		gi|460366048	PREDICTED: ribulose bisphosphate carboxylase large chain-like [Solanum lycopersicum]	246	53615	10	7	7	6	71	1	0	1	1023.46	1022.45	1	1022.43	0.019	350	357	0	50.68	0.092	R	DDFVEQDR	S				bffdb68b-84c5-40f5-a550-eb469cc6c48d
1		gi|460366048	PREDICTED: ribulose bisphosphate carboxylase large chain-like [Solanum lycopersicum]	246	53615	10	7	7	6	72	1	0	1	1023.46	1022.45	1	1022.43	0.0206	350	357	0	48.87	0.091	R	DDFVEQDR	S				5f44fb3d-87a9-437e-8b6e-907154a5b7b8
1		gi|460366048	PREDICTED: ribulose bisphosphate carboxylase large chain-like [Solanum lycopersicum]	246	53615	10	7	7	6	117	2	0	0	1261.75	1260.74	1	1260.71	0.0344	339	349	0	101.85	2.6e-06	R	DITLGFVDLLR	D				aa688366-6c2a-4175-bf1c-50be13a24142
1		gi|460366048	PREDICTED: ribulose bisphosphate carboxylase large chain-like [Solanum lycopersicum]	246	53615	10	7	7	6	169	1	0	0	1451.6	1450.59	1	1450.61	-0.0268	201	212	0	93.29	1.2e-05	K	DDENVNSQPFMR	W				9add7bb2-334b-4be0-a06a-12b9ae6262a5
1		gi|460366048	PREDICTED: ribulose bisphosphate carboxylase large chain-like [Solanum lycopersicum]	246	53615	10	7	7	6	177	1	0	0	1467.59	1466.59	1	1466.61	-0.0243	201	212	0	65.15	0.0069	K	DDENVNSQPFMR	W	Oxidation (M)	0.000000000010.0		8e07f201-6520-4ce6-8f0b-2a0050986e61
1		gi|460366048	PREDICTED: ribulose bisphosphate carboxylase large chain-like [Solanum lycopersicum]	246	53615	10	7	7	6	178	1	0	0	1467.62	1466.62	1	1466.61	0.006	201	212	0	48.28	0.043	K	DDENVNSQPFMR	W	Oxidation (M)	0.000000000010.0		ad1d5914-626a-4824-8118-2641481df83c
1		gi|460366048	PREDICTED: ribulose bisphosphate carboxylase large chain-like [Solanum lycopersicum]	246	53615	10	7	7	6	190	1	0	0	1497.7	1496.69	1	1496.7	-0.0151	319	333	0	71.08	0.0016	R	MSGGDHIHSGTVVGK	L	Oxidation (M)	0.100000000000000.0		3010fe4d-82cd-4323-934a-cbbcc31a34ee
1		gi|460366048	PREDICTED: ribulose bisphosphate carboxylase large chain-like [Solanum lycopersicum]	246	53615	10	7	7	6	202	1	0	0	1546.77	1545.76	1	1545.73	0.0348	450	462	0	91.76	3e-05	K	WSPELAAACEVWK	E				94157d68-1ffb-41d7-be86-fa11548b3061
1		gi|460366048	PREDICTED: ribulose bisphosphate carboxylase large chain-like [Solanum lycopersicum]	246	53615	10	7	7	6	212	1	0	1	1579.86	1578.85	1	1578.83	0.0246	463	476	0	101.07	3.3e-06	K	EIVFNFAAVDVLDK	-				9eea579f-21ef-4600-8d7c-d765cc21fcab
1		gi|460366048	PREDICTED: ribulose bisphosphate carboxylase large chain-like [Solanum lycopersicum]	246	53615	10	7	7	6	249	1	0	0	1810.88	1809.88	1	1809.8	0.0726	236	251	0	92.55	2.1e-05	K	GHYLNATAGTCEEMIK	R	Oxidation (M)	0.0000000000000100.0		cf4f86cf-da03-466e-86ba-b861b6db9e02
1		gi|21634097	ribulose-1,5-bisphosphate carboxylase/oxygenase large subunit [Metaporana parvifolia]	243	52662	8	7	6	6	70	1	0	0	1021.58	1020.58	1	1020.52	0.0536	26	34	0	77.84	0.00083	K	DTDILAAFR	V				84d29dc6-368b-4900-bd77-c856650145f7
1		gi|21634097	ribulose-1,5-bisphosphate carboxylase/oxygenase large subunit [Metaporana parvifolia]	243	52662	8	7	6	6	115	1	0	1	1257.69	1256.69	1	1256.64	0.0503	429	439	0	95.97	1.4e-05	R	DLAQEGNEIIR	Q				bcc600e8-1e0b-4157-b229-5a5a2d1d6899
1		gi|21634097	ribulose-1,5-bisphosphate carboxylase/oxygenase large subunit [Metaporana parvifolia]	243	52662	8	7	6	6	117	2	0	0	1261.75	1260.74	1	1260.71	0.0344	333	343	0	101.85	2.6e-06	R	DITLGFVDLLR	D				aa688366-6c2a-4175-bf1c-50be13a24142
1		gi|21634097	ribulose-1,5-bisphosphate carboxylase/oxygenase large subunit [Metaporana parvifolia]	243	52662	8	7	6	6	169	1	0	0	1451.6	1450.59	1	1450.61	-0.0268	195	206	0	93.29	1.2e-05	K	DDENVNSQPFMR	W				9add7bb2-334b-4be0-a06a-12b9ae6262a5
1		gi|21634097	ribulose-1,5-bisphosphate carboxylase/oxygenase large subunit [Metaporana parvifolia]	243	52662	8	7	6	6	177	1	0	0	1467.59	1466.59	1	1466.61	-0.0243	195	206	0	65.15	0.0069	K	DDENVNSQPFMR	W	Oxidation (M)	0.000000000010.0		8e07f201-6520-4ce6-8f0b-2a0050986e61
1		gi|21634097	ribulose-1,5-bisphosphate carboxylase/oxygenase large subunit [Metaporana parvifolia]	243	52662	8	7	6	6	178	1	0	0	1467.62	1466.62	1	1466.61	0.006	195	206	0	48.28	0.043	K	DDENVNSQPFMR	W	Oxidation (M)	0.000000000010.0		ad1d5914-626a-4824-8118-2641481df83c
1		gi|21634097	ribulose-1,5-bisphosphate carboxylase/oxygenase large subunit [Metaporana parvifolia]	243	52662	8	7	6	6	202	1	0	0	1546.77	1545.76	1	1545.73	0.0348	444	456	0	91.76	3e-05	K	WSPELAAACEVWK	E				94157d68-1ffb-41d7-be86-fa11548b3061
1		gi|21634097	ribulose-1,5-bisphosphate carboxylase/oxygenase large subunit [Metaporana parvifolia]	243	52662	8	7	6	6	249	1	0	0	1810.88	1809.88	1	1809.8	0.0726	230	245	0	92.55	2.1e-05	K	GHYLNATAGTCEEMIK	R	Oxidation (M)	0.0000000000000100.0		cf4f86cf-da03-466e-86ba-b861b6db9e02
1		gi|1771188	ribulose-1,5-bisphosphate carboxylase/oxygenase large subunit [Leonia glycycarpa]	242	52093	9	8	7	7	70	1	0	0	1021.58	1020.58	1	1020.52	0.0536	24	32	0	77.84	0.00083	K	DTDILAAFR	V				84d29dc6-368b-4900-bd77-c856650145f7
1		gi|1771188	ribulose-1,5-bisphosphate carboxylase/oxygenase large subunit [Leonia glycycarpa]	242	52093	9	8	7	7	117	2	0	0	1261.75	1260.74	1	1260.71	0.0344	331	341	0	101.85	2.6e-06	R	DITLGFVDLLR	D				aa688366-6c2a-4175-bf1c-50be13a24142
1		gi|1771188	ribulose-1,5-bisphosphate carboxylase/oxygenase large subunit [Leonia glycycarpa]	242	52093	9	8	7	7	144	1	0	1	1315.73	1314.72	1	1314.7	0.0272	108	119	0	61.79	9.4e-05	R	FTSIVGNVFGFK	A				014fece4-4058-40a5-9ee9-4e58a2907960
1		gi|1771188	ribulose-1,5-bisphosphate carboxylase/oxygenase large subunit [Leonia glycycarpa]	242	52093	9	8	7	7	169	1	0	0	1451.6	1450.59	1	1450.61	-0.0268	193	204	0	93.29	1.2e-05	K	DDENVNSQPFMR	W				9add7bb2-334b-4be0-a06a-12b9ae6262a5
1		gi|1771188	ribulose-1,5-bisphosphate carboxylase/oxygenase large subunit [Leonia glycycarpa]	242	52093	9	8	7	7	177	1	0	0	1467.59	1466.59	1	1466.61	-0.0243	193	204	0	65.15	0.0069	K	DDENVNSQPFMR	W	Oxidation (M)	0.000000000010.0		8e07f201-6520-4ce6-8f0b-2a0050986e61
1		gi|1771188	ribulose-1,5-bisphosphate carboxylase/oxygenase large subunit [Leonia glycycarpa]	242	52093	9	8	7	7	178	1	0	0	1467.62	1466.62	1	1466.61	0.006	193	204	0	48.28	0.043	K	DDENVNSQPFMR	W	Oxidation (M)	0.000000000010.0		ad1d5914-626a-4824-8118-2641481df83c
1		gi|1771188	ribulose-1,5-bisphosphate carboxylase/oxygenase large subunit [Leonia glycycarpa]	242	52093	9	8	7	7	190	1	0	0	1497.7	1496.69	1	1496.7	-0.0151	311	325	0	71.08	0.0016	R	MSGGDHIHSGTVVGK	L	Oxidation (M)	0.100000000000000.0		3010fe4d-82cd-4323-934a-cbbcc31a34ee
1		gi|1771188	ribulose-1,5-bisphosphate carboxylase/oxygenase large subunit [Leonia glycycarpa]	242	52093	9	8	7	7	202	1	0	0	1546.77	1545.76	1	1545.73	0.0348	442	454	0	91.76	3e-05	K	WSPELAAACEVWK	E				94157d68-1ffb-41d7-be86-fa11548b3061
1		gi|1771188	ribulose-1,5-bisphosphate carboxylase/oxygenase large subunit [Leonia glycycarpa]	242	52093	9	8	7	7	249	1	0	0	1810.88	1809.88	1	1809.8	0.0726	228	243	0	92.55	2.1e-05	K	GHYLNATAGTCEEMIK	R	Oxidation (M)	0.0000000000000100.0		cf4f86cf-da03-466e-86ba-b861b6db9e02
1		gi|312370165	ribulose-1,5-bisphosphate carboxylase/oxygenase large subunit [Physochlaina praealta]	241	27056	8	6	7	6	71	1	0	1	1023.46	1022.45	1	1022.43	0.019	118	125	0	50.68	0.092	R	DDFVEQDR	S				bffdb68b-84c5-40f5-a550-eb469cc6c48d
1		gi|312370165	ribulose-1,5-bisphosphate carboxylase/oxygenase large subunit [Physochlaina praealta]	241	27056	8	6	7	6	72	1	0	1	1023.46	1022.45	1	1022.43	0.0206	118	125	0	48.87	0.091	R	DDFVEQDR	S				5f44fb3d-87a9-437e-8b6e-907154a5b7b8
1		gi|312370165	ribulose-1,5-bisphosphate carboxylase/oxygenase large subunit [Physochlaina praealta]	241	27056	8	6	7	6	115	1	0	1	1257.69	1256.69	1	1256.64	0.0503	203	213	0	95.97	1.4e-05	R	DLAQEGNEIIR	E				bcc600e8-1e0b-4157-b229-5a5a2d1d6899
1		gi|312370165	ribulose-1,5-bisphosphate carboxylase/oxygenase large subunit [Physochlaina praealta]	241	27056	8	6	7	6	117	2	0	0	1261.75	1260.74	1	1260.71	0.0344	107	117	0	101.85	2.6e-06	R	DITLGFVDLLR	D				aa688366-6c2a-4175-bf1c-50be13a24142
1		gi|312370165	ribulose-1,5-bisphosphate carboxylase/oxygenase large subunit [Physochlaina praealta]	241	27056	8	6	7	6	190	1	0	0	1497.7	1496.69	1	1496.7	-0.0151	87	101	0	71.08	0.0016	R	MSGGDHIHSGTVVGK	L	Oxidation (M)	0.100000000000000.0		3010fe4d-82cd-4323-934a-cbbcc31a34ee
1		gi|312370165	ribulose-1,5-bisphosphate carboxylase/oxygenase large subunit [Physochlaina praealta]	241	27056	8	6	7	6	202	1	0	0	1546.77	1545.76	1	1545.73	0.0348	218	230	0	91.76	3e-05	K	WSPELAAACEVWK	E				94157d68-1ffb-41d7-be86-fa11548b3061
1		gi|312370165	ribulose-1,5-bisphosphate carboxylase/oxygenase large subunit [Physochlaina praealta]	241	27056	8	6	7	6	212	1	0	1	1579.86	1578.85	1	1578.83	0.0246	231	244	0	101.07	3.3e-06	K	EIVFNFAAVDVLDK	-				9eea579f-21ef-4600-8d7c-d765cc21fcab
1		gi|312370165	ribulose-1,5-bisphosphate carboxylase/oxygenase large subunit [Physochlaina praealta]	241	27056	8	6	7	6	249	1	0	0	1810.88	1809.88	1	1809.8	0.0726	4	19	0	92.55	2.1e-05	K	GHYLNATAGTCEEMIK	R	Oxidation (M)	0.0000000000000100.0		cf4f86cf-da03-466e-86ba-b861b6db9e02
1		gi|18140593	ribulose-1,5-bisphosphate carboxylase/oxygenase large subunit [Polyspora chrysandra]	236	49341	9	8	7	7	70	1	0	0	1021.58	1020.58	1	1020.52	0.0536	23	31	0	77.84	0.00083	K	DTDILAAFR	V				84d29dc6-368b-4900-bd77-c856650145f7
1		gi|18140593	ribulose-1,5-bisphosphate carboxylase/oxygenase large subunit [Polyspora chrysandra]	236	49341	9	8	7	7	115	1	0	1	1257.69	1256.69	1	1256.67	0.014	426	436	1	95.97	1.4e-05	R	DLAKEGNEIIR	E				bcc600e8-1e0b-4157-b229-5a5a2d1d6899
1		gi|18140593	ribulose-1,5-bisphosphate carboxylase/oxygenase large subunit [Polyspora chrysandra]	236	49341	9	8	7	7	116	5	0	0	1261.66	1260.65	1	1260.62	0.0335	208	217	0	75.01	0.0017	R	FLFCAEAIYK	A				208f2f60-1cbb-4e5b-ba4a-a0138d994a65
1		gi|18140593	ribulose-1,5-bisphosphate carboxylase/oxygenase large subunit [Polyspora chrysandra]	236	49341	9	8	7	7	117	2	0	0	1261.75	1260.74	1	1260.71	0.0344	330	340	0	101.85	2.6e-06	R	DITLGFVDLLR	D				aa688366-6c2a-4175-bf1c-50be13a24142
1		gi|18140593	ribulose-1,5-bisphosphate carboxylase/oxygenase large subunit [Polyspora chrysandra]	236	49341	9	8	7	7	169	1	0	0	1451.6	1450.59	1	1450.61	-0.0268	192	203	0	93.29	1.2e-05	K	DDENVNSQPFMR	W				9add7bb2-334b-4be0-a06a-12b9ae6262a5
1		gi|18140593	ribulose-1,5-bisphosphate carboxylase/oxygenase large subunit [Polyspora chrysandra]	236	49341	9	8	7	7	177	1	0	0	1467.59	1466.59	1	1466.61	-0.0243	192	203	0	65.15	0.0069	K	DDENVNSQPFMR	W	Oxidation (M)	0.000000000010.0		8e07f201-6520-4ce6-8f0b-2a0050986e61
1		gi|18140593	ribulose-1,5-bisphosphate carboxylase/oxygenase large subunit [Polyspora chrysandra]	236	49341	9	8	7	7	178	1	0	0	1467.62	1466.62	1	1466.61	0.006	192	203	0	48.28	0.043	K	DDENVNSQPFMR	W	Oxidation (M)	0.000000000010.0		ad1d5914-626a-4824-8118-2641481df83c
1		gi|18140593	ribulose-1,5-bisphosphate carboxylase/oxygenase large subunit [Polyspora chrysandra]	236	49341	9	8	7	7	190	1	0	0	1497.7	1496.69	1	1496.7	-0.0151	310	324	0	71.08	0.0016	R	MSGGDHIHSGTVVGK	L	Oxidation (M)	0.100000000000000.0		3010fe4d-82cd-4323-934a-cbbcc31a34ee
1		gi|18140593	ribulose-1,5-bisphosphate carboxylase/oxygenase large subunit [Polyspora chrysandra]	236	49341	9	8	7	7	249	1	0	0	1810.88	1809.88	1	1809.8	0.0726	227	242	0	92.55	2.1e-05	K	GHYLNATAGTCEEMIK	R	Oxidation (M)	0.0000000000000100.0		cf4f86cf-da03-466e-86ba-b861b6db9e02
1		gi|132011	RecName: Full=Ribulose bisphosphate carboxylase large chain; Short=RuBisCO large subunit; Flags: Precursor	235	53456	11	8	8	7	70	1	0	0	1021.58	1020.58	1	1020.52	0.0536	33	41	0	77.84	0.00083	K	DTDILAAFR	V				84d29dc6-368b-4900-bd77-c856650145f7
1		gi|132011	RecName: Full=Ribulose bisphosphate carboxylase large chain; Short=RuBisCO large subunit; Flags: Precursor	235	53456	11	8	8	7	71	1	0	1	1023.46	1022.45	1	1022.43	0.019	351	358	0	50.68	0.092	R	DDFVEQDR	S				bffdb68b-84c5-40f5-a550-eb469cc6c48d
1		gi|132011	RecName: Full=Ribulose bisphosphate carboxylase large chain; Short=RuBisCO large subunit; Flags: Precursor	235	53456	11	8	8	7	72	1	0	1	1023.46	1022.45	1	1022.43	0.0206	351	358	0	48.87	0.091	R	DDFVEQDR	S				5f44fb3d-87a9-437e-8b6e-907154a5b7b8
1		gi|132011	RecName: Full=Ribulose bisphosphate carboxylase large chain; Short=RuBisCO large subunit; Flags: Precursor	235	53456	11	8	8	7	115	1	0	1	1257.69	1256.69	1	1256.64	0.0503	436	446	0	95.97	1.4e-05	R	DLAQEGNEIIR	E				bcc600e8-1e0b-4157-b229-5a5a2d1d6899
1		gi|132011	RecName: Full=Ribulose bisphosphate carboxylase large chain; Short=RuBisCO large subunit; Flags: Precursor	235	53456	11	8	8	7	116	5	0	0	1261.66	1260.65	1	1260.62	0.0335	218	227	0	75.01	0.0017	R	FLFCAEAIYK	S				208f2f60-1cbb-4e5b-ba4a-a0138d994a65
1		gi|132011	RecName: Full=Ribulose bisphosphate carboxylase large chain; Short=RuBisCO large subunit; Flags: Precursor	235	53456	11	8	8	7	117	2	0	0	1261.75	1260.74	1	1260.71	0.0344	340	350	0	101.85	2.6e-06	R	DITLGFVDLLR	D				aa688366-6c2a-4175-bf1c-50be13a24142
1		gi|132011	RecName: Full=Ribulose bisphosphate carboxylase large chain; Short=RuBisCO large subunit; Flags: Precursor	235	53456	11	8	8	7	169	1	0	0	1451.6	1450.59	1	1450.61	-0.0268	202	213	0	93.29	1.2e-05	K	DDENVNSQPFMR	W				9add7bb2-334b-4be0-a06a-12b9ae6262a5
1		gi|132011	RecName: Full=Ribulose bisphosphate carboxylase large chain; Short=RuBisCO large subunit; Flags: Precursor	235	53456	11	8	8	7	177	1	0	0	1467.59	1466.59	1	1466.61	-0.0243	202	213	0	65.15	0.0069	K	DDENVNSQPFMR	W	Oxidation (M)	0.000000000010.0		8e07f201-6520-4ce6-8f0b-2a0050986e61
1		gi|132011	RecName: Full=Ribulose bisphosphate carboxylase large chain; Short=RuBisCO large subunit; Flags: Precursor	235	53456	11	8	8	7	178	1	0	0	1467.62	1466.62	1	1466.61	0.006	202	213	0	48.28	0.043	K	DDENVNSQPFMR	W	Oxidation (M)	0.000000000010.0		ad1d5914-626a-4824-8118-2641481df83c
1		gi|132011	RecName: Full=Ribulose bisphosphate carboxylase large chain; Short=RuBisCO large subunit; Flags: Precursor	235	53456	11	8	8	7	190	1	0	0	1497.7	1496.69	1	1496.7	-0.0151	320	334	0	71.08	0.0016	R	MSGGDHIHSGTVVGK	L	Oxidation (M)	0.100000000000000.0		3010fe4d-82cd-4323-934a-cbbcc31a34ee
1		gi|132011	RecName: Full=Ribulose bisphosphate carboxylase large chain; Short=RuBisCO large subunit; Flags: Precursor	235	53456	11	8	8	7	202	1	0	0	1546.77	1545.76	1	1545.73	0.0348	451	463	0	91.76	3e-05	K	WSPELAAACEVWK	E				94157d68-1ffb-41d7-be86-fa11548b3061
1		gi|3334480	RecName: Full=Ribulose bisphosphate carboxylase large chain; Short=RuBisCO large subunit; Flags: Precursor	235	53470	9	8	7	7	70	1	0	0	1021.58	1020.58	1	1020.52	0.0536	33	41	0	77.84	0.00083	K	DTDILAAFR	V				84d29dc6-368b-4900-bd77-c856650145f7
1		gi|3334480	RecName: Full=Ribulose bisphosphate carboxylase large chain; Short=RuBisCO large subunit; Flags: Precursor	235	53470	9	8	7	7	115	1	0	1	1257.69	1256.69	1	1256.64	0.0503	436	446	0	95.97	1.4e-05	R	DLAQEGNEIIR	E				bcc600e8-1e0b-4157-b229-5a5a2d1d6899
1		gi|3334480	RecName: Full=Ribulose bisphosphate carboxylase large chain; Short=RuBisCO large subunit; Flags: Precursor	235	53470	9	8	7	7	116	5	0	0	1261.66	1260.65	1	1260.62	0.0335	218	227	0	75.01	0.0017	R	FLFCAEAIYK	S				208f2f60-1cbb-4e5b-ba4a-a0138d994a65
1		gi|3334480	RecName: Full=Ribulose bisphosphate carboxylase large chain; Short=RuBisCO large subunit; Flags: Precursor	235	53470	9	8	7	7	169	1	0	0	1451.6	1450.59	1	1450.61	-0.0268	202	213	0	93.29	1.2e-05	K	DDENVNSQPFMR	W				9add7bb2-334b-4be0-a06a-12b9ae6262a5
1		gi|3334480	RecName: Full=Ribulose bisphosphate carboxylase large chain; Short=RuBisCO large subunit; Flags: Precursor	235	53470	9	8	7	7	177	1	0	0	1467.59	1466.59	1	1466.61	-0.0243	202	213	0	65.15	0.0069	K	DDENVNSQPFMR	W	Oxidation (M)	0.000000000010.0		8e07f201-6520-4ce6-8f0b-2a0050986e61
1		gi|3334480	RecName: Full=Ribulose bisphosphate carboxylase large chain; Short=RuBisCO large subunit; Flags: Precursor	235	53470	9	8	7	7	178	1	0	0	1467.62	1466.62	1	1466.61	0.006	202	213	0	48.28	0.043	K	DDENVNSQPFMR	W	Oxidation (M)	0.000000000010.0		ad1d5914-626a-4824-8118-2641481df83c
1		gi|3334480	RecName: Full=Ribulose bisphosphate carboxylase large chain; Short=RuBisCO large subunit; Flags: Precursor	235	53470	9	8	7	7	190	1	0	0	1497.7	1496.69	1	1496.7	-0.0151	320	334	0	71.08	0.0016	R	MSGGDHIHSGTVVGK	L	Oxidation (M)	0.100000000000000.0		3010fe4d-82cd-4323-934a-cbbcc31a34ee
1		gi|3334480	RecName: Full=Ribulose bisphosphate carboxylase large chain; Short=RuBisCO large subunit; Flags: Precursor	235	53470	9	8	7	7	202	1	0	0	1546.77	1545.76	1	1545.73	0.0348	451	463	0	91.76	3e-05	K	WSPELAAACEVWK	E				94157d68-1ffb-41d7-be86-fa11548b3061
1		gi|3334480	RecName: Full=Ribulose bisphosphate carboxylase large chain; Short=RuBisCO large subunit; Flags: Precursor	235	53470	9	8	7	7	212	1	0	1	1579.86	1578.85	1	1578.83	0.0246	464	477	0	101.07	3.3e-06	K	EIVFNFAAVDVLDK	-				9eea579f-21ef-4600-8d7c-d765cc21fcab
1		gi|10764607	ribulose-1,5-biphosphate carboxylase/oxygenase large subunit [Anodopetalum biglandulosum]	233	51398	9	8	7	7	70	1	0	0	1021.58	1020.58	1	1020.52	0.0536	18	26	0	77.84	0.00083	K	DTDILAAFR	V				84d29dc6-368b-4900-bd77-c856650145f7
1		gi|10764607	ribulose-1,5-biphosphate carboxylase/oxygenase large subunit [Anodopetalum biglandulosum]	233	51398	9	8	7	7	116	5	0	0	1261.66	1260.65	1	1260.62	0.0335	203	212	0	75.01	0.0017	R	FLFCAEAIYK	A				208f2f60-1cbb-4e5b-ba4a-a0138d994a65
1		gi|10764607	ribulose-1,5-biphosphate carboxylase/oxygenase large subunit [Anodopetalum biglandulosum]	233	51398	9	8	7	7	117	2	0	0	1261.75	1260.74	1	1260.71	0.0344	325	335	0	101.85	2.6e-06	R	DITLGFVDLLR	D				aa688366-6c2a-4175-bf1c-50be13a24142
1		gi|10764607	ribulose-1,5-biphosphate carboxylase/oxygenase large subunit [Anodopetalum biglandulosum]	233	51398	9	8	7	7	169	1	0	0	1451.6	1450.59	1	1450.61	-0.0268	187	198	0	93.29	1.2e-05	K	DDENVNSQPFMR	W				9add7bb2-334b-4be0-a06a-12b9ae6262a5
1		gi|10764607	ribulose-1,5-biphosphate carboxylase/oxygenase large subunit [Anodopetalum biglandulosum]	233	51398	9	8	7	7	177	1	0	0	1467.59	1466.59	1	1466.61	-0.0243	187	198	0	65.15	0.0069	K	DDENVNSQPFMR	W	Oxidation (M)	0.000000000010.0		8e07f201-6520-4ce6-8f0b-2a0050986e61
1		gi|10764607	ribulose-1,5-biphosphate carboxylase/oxygenase large subunit [Anodopetalum biglandulosum]	233	51398	9	8	7	7	178	1	0	0	1467.62	1466.62	1	1466.61	0.006	187	198	0	48.28	0.043	K	DDENVNSQPFMR	W	Oxidation (M)	0.000000000010.0		ad1d5914-626a-4824-8118-2641481df83c
1		gi|10764607	ribulose-1,5-biphosphate carboxylase/oxygenase large subunit [Anodopetalum biglandulosum]	233	51398	9	8	7	7	190	1	0	0	1497.7	1496.69	1	1496.7	-0.0151	305	319	0	71.08	0.0016	R	MSGGDHIHSGTVVGK	L	Oxidation (M)	0.100000000000000.0		3010fe4d-82cd-4323-934a-cbbcc31a34ee
1		gi|10764607	ribulose-1,5-biphosphate carboxylase/oxygenase large subunit [Anodopetalum biglandulosum]	233	51398	9	8	7	7	202	1	0	0	1546.77	1545.76	1	1545.73	0.0348	436	448	0	91.76	3e-05	K	WSPELAAACEVWK	E				94157d68-1ffb-41d7-be86-fa11548b3061
1		gi|10764607	ribulose-1,5-biphosphate carboxylase/oxygenase large subunit [Anodopetalum biglandulosum]	233	51398	9	8	7	7	249	1	0	0	1810.88	1809.88	1	1809.8	0.0726	222	237	0	92.55	2.1e-05	K	GHYLNATAGTCEEMIK	R	Oxidation (M)	0.0000000000000100.0		cf4f86cf-da03-466e-86ba-b861b6db9e02
1		gi|91208996	ribulose-1,5-bisphosphate carboxylase/oxygenase large subunit [Solanum bulbocastanum]	230	53397	8	7	6	6	70	1	0	0	1021.58	1020.58	1	1020.52	0.0536	33	41	0	77.84	0.00083	K	DTDILAAFR	V				84d29dc6-368b-4900-bd77-c856650145f7
1		gi|91208996	ribulose-1,5-bisphosphate carboxylase/oxygenase large subunit [Solanum bulbocastanum]	230	53397	8	7	6	6	117	2	0	0	1261.75	1260.74	1	1260.71	0.0344	340	350	0	101.85	2.6e-06	R	DITLGFVDLLR	D				aa688366-6c2a-4175-bf1c-50be13a24142
1		gi|91208996	ribulose-1,5-bisphosphate carboxylase/oxygenase large subunit [Solanum bulbocastanum]	230	53397	8	7	6	6	169	1	0	0	1451.6	1450.59	1	1450.61	-0.0268	202	213	0	93.29	1.2e-05	K	DDENVNSQPFMR	W				9add7bb2-334b-4be0-a06a-12b9ae6262a5
1		gi|91208996	ribulose-1,5-bisphosphate carboxylase/oxygenase large subunit [Solanum bulbocastanum]	230	53397	8	7	6	6	177	1	0	0	1467.59	1466.59	1	1466.61	-0.0243	202	213	0	65.15	0.0069	K	DDENVNSQPFMR	W	Oxidation (M)	0.000000000010.0		8e07f201-6520-4ce6-8f0b-2a0050986e61
1		gi|91208996	ribulose-1,5-bisphosphate carboxylase/oxygenase large subunit [Solanum bulbocastanum]	230	53397	8	7	6	6	178	1	0	0	1467.62	1466.62	1	1466.61	0.006	202	213	0	48.28	0.043	K	DDENVNSQPFMR	W	Oxidation (M)	0.000000000010.0		ad1d5914-626a-4824-8118-2641481df83c
1		gi|91208996	ribulose-1,5-bisphosphate carboxylase/oxygenase large subunit [Solanum bulbocastanum]	230	53397	8	7	6	6	190	1	0	0	1497.7	1496.69	1	1496.7	-0.0151	320	334	0	71.08	0.0016	R	MSGGDHIHSGTVVGK	L	Oxidation (M)	0.100000000000000.0		3010fe4d-82cd-4323-934a-cbbcc31a34ee
1		gi|91208996	ribulose-1,5-bisphosphate carboxylase/oxygenase large subunit [Solanum bulbocastanum]	230	53397	8	7	6	6	202	1	0	0	1546.77	1545.76	1	1545.73	0.0348	451	463	0	91.76	3e-05	K	WSPELAAACEVWK	E				94157d68-1ffb-41d7-be86-fa11548b3061
1		gi|91208996	ribulose-1,5-bisphosphate carboxylase/oxygenase large subunit [Solanum bulbocastanum]	230	53397	8	7	6	6	212	1	0	1	1579.86	1578.85	1	1578.83	0.0246	464	477	0	101.07	3.3e-06	K	EIVFNFAAVDVLDK	-				9eea579f-21ef-4600-8d7c-d765cc21fcab
1		gi|32332099	ribulose-1,5-bisphosphate carboxylase/oxygenase large subunit [Browallia speciosa]	229	41624	9	6	6	5	71	1	0	1	1023.46	1022.45	1	1022.43	0.019	245	252	0	50.68	0.092	R	DDFVEQDR	S				bffdb68b-84c5-40f5-a550-eb469cc6c48d
1		gi|32332099	ribulose-1,5-bisphosphate carboxylase/oxygenase large subunit [Browallia speciosa]	229	41624	9	6	6	5	72	1	0	1	1023.46	1022.45	1	1022.43	0.0206	245	252	0	48.87	0.091	R	DDFVEQDR	S				5f44fb3d-87a9-437e-8b6e-907154a5b7b8
1		gi|32332099	ribulose-1,5-bisphosphate carboxylase/oxygenase large subunit [Browallia speciosa]	229	41624	9	6	6	5	115	1	0	1	1257.69	1256.69	1	1256.64	0.0503	330	340	0	95.97	1.4e-05	R	DLAQEGNEIIR	E				bcc600e8-1e0b-4157-b229-5a5a2d1d6899
1		gi|32332099	ribulose-1,5-bisphosphate carboxylase/oxygenase large subunit [Browallia speciosa]	229	41624	9	6	6	5	117	2	0	0	1261.75	1260.74	1	1260.71	0.0344	234	244	0	101.85	2.6e-06	R	DITLGFVDLLR	D				aa688366-6c2a-4175-bf1c-50be13a24142
1		gi|32332099	ribulose-1,5-bisphosphate carboxylase/oxygenase large subunit [Browallia speciosa]	229	41624	9	6	6	5	169	1	0	0	1451.6	1450.59	1	1450.61	-0.0268	96	107	0	93.29	1.2e-05	K	DDENVNSQPFMR	W				9add7bb2-334b-4be0-a06a-12b9ae6262a5
1		gi|32332099	ribulose-1,5-bisphosphate carboxylase/oxygenase large subunit [Browallia speciosa]	229	41624	9	6	6	5	177	1	0	0	1467.59	1466.59	1	1466.61	-0.0243	96	107	0	65.15	0.0069	K	DDENVNSQPFMR	W	Oxidation (M)	0.000000000010.0		8e07f201-6520-4ce6-8f0b-2a0050986e61
1		gi|32332099	ribulose-1,5-bisphosphate carboxylase/oxygenase large subunit [Browallia speciosa]	229	41624	9	6	6	5	178	1	0	0	1467.62	1466.62	1	1466.61	0.006	96	107	0	48.28	0.043	K	DDENVNSQPFMR	W	Oxidation (M)	0.000000000010.0		ad1d5914-626a-4824-8118-2641481df83c
1		gi|32332099	ribulose-1,5-bisphosphate carboxylase/oxygenase large subunit [Browallia speciosa]	229	41624	9	6	6	5	202	1	0	0	1546.77	1545.76	1	1545.73	0.0348	345	357	0	91.76	3e-05	K	WSPELAAACEVWK	E				94157d68-1ffb-41d7-be86-fa11548b3061
1		gi|32332099	ribulose-1,5-bisphosphate carboxylase/oxygenase large subunit [Browallia speciosa]	229	41624	9	6	6	5	249	1	0	0	1810.88	1809.88	1	1809.8	0.0726	131	146	0	92.55	2.1e-05	K	GHYLNATAGTCEEMIK	R	Oxidation (M)	0.0000000000000100.0		cf4f86cf-da03-466e-86ba-b861b6db9e02
1		gi|330414153	ribulose-1,5-bisphosphate carboxylase/oxygenase large subunit [Wendlandia arabica]	228	40386	8	7	6	6	117	2	0	0	1261.75	1260.74	1	1260.71	0.0344	224	234	0	101.85	2.6e-06	R	DITLGFVDLLR	D				aa688366-6c2a-4175-bf1c-50be13a24142
1		gi|330414153	ribulose-1,5-bisphosphate carboxylase/oxygenase large subunit [Wendlandia arabica]	228	40386	8	7	6	6	144	1	0	1	1315.73	1314.72	1	1314.7	0.0272	1	12	0	61.79	9.4e-05	-	FTSIVGNVFGFK	A				014fece4-4058-40a5-9ee9-4e58a2907960
1		gi|330414153	ribulose-1,5-bisphosphate carboxylase/oxygenase large subunit [Wendlandia arabica]	228	40386	8	7	6	6	169	1	0	0	1451.6	1450.59	1	1450.61	-0.0268	86	97	0	93.29	1.2e-05	K	DDENVNSQPFMR	W				9add7bb2-334b-4be0-a06a-12b9ae6262a5
1		gi|330414153	ribulose-1,5-bisphosphate carboxylase/oxygenase large subunit [Wendlandia arabica]	228	40386	8	7	6	6	177	1	0	0	1467.59	1466.59	1	1466.61	-0.0243	86	97	0	65.15	0.0069	K	DDENVNSQPFMR	W	Oxidation (M)	0.000000000010.0		8e07f201-6520-4ce6-8f0b-2a0050986e61
1		gi|330414153	ribulose-1,5-bisphosphate carboxylase/oxygenase large subunit [Wendlandia arabica]	228	40386	8	7	6	6	178	1	0	0	1467.62	1466.62	1	1466.61	0.006	86	97	0	48.28	0.043	K	DDENVNSQPFMR	W	Oxidation (M)	0.000000000010.0		ad1d5914-626a-4824-8118-2641481df83c
1		gi|330414153	ribulose-1,5-bisphosphate carboxylase/oxygenase large subunit [Wendlandia arabica]	228	40386	8	7	6	6	190	1	0	0	1497.7	1496.69	1	1496.7	-0.0151	204	218	0	71.08	0.0016	R	MSGGDHIHSGTVVGK	L	Oxidation (M)	0.100000000000000.0		3010fe4d-82cd-4323-934a-cbbcc31a34ee
1		gi|330414153	ribulose-1,5-bisphosphate carboxylase/oxygenase large subunit [Wendlandia arabica]	228	40386	8	7	6	6	202	1	0	0	1546.77	1545.76	1	1545.73	0.0348	335	347	0	91.76	3e-05	K	WSPELAAACEVWK	E				94157d68-1ffb-41d7-be86-fa11548b3061
1		gi|330414153	ribulose-1,5-bisphosphate carboxylase/oxygenase large subunit [Wendlandia arabica]	228	40386	8	7	6	6	249	1	0	0	1810.88	1809.88	1	1809.8	0.0726	121	136	0	92.55	2.1e-05	K	GHYLNATAGTCEEMIK	R	Oxidation (M)	0.0000000000000100.0		cf4f86cf-da03-466e-86ba-b861b6db9e02
1		gi|1870032	ribulose-1,5-bisphosphate carboxylase/oxygenase large subunit [Odontostomum hartwegii]	226	52260	9	8	7	7	70	1	0	0	1021.58	1020.58	1	1020.52	0.0536	24	32	0	77.84	0.00083	K	DTDILAAFR	V				84d29dc6-368b-4900-bd77-c856650145f7
1		gi|1870032	ribulose-1,5-bisphosphate carboxylase/oxygenase large subunit [Odontostomum hartwegii]	226	52260	9	8	7	7	115	1	0	1	1257.69	1256.69	1	1256.67	0.014	427	437	1	95.97	1.4e-05	R	DLAKEGNEIIR	E				bcc600e8-1e0b-4157-b229-5a5a2d1d6899
1		gi|1870032	ribulose-1,5-bisphosphate carboxylase/oxygenase large subunit [Odontostomum hartwegii]	226	52260	9	8	7	7	116	5	0	0	1261.66	1260.65	1	1260.62	0.0335	209	218	0	75.01	0.0017	R	FLFCAEAIYK	A				208f2f60-1cbb-4e5b-ba4a-a0138d994a65
1		gi|1870032	ribulose-1,5-bisphosphate carboxylase/oxygenase large subunit [Odontostomum hartwegii]	226	52260	9	8	7	7	169	1	0	0	1451.6	1450.59	1	1450.61	-0.0268	193	204	0	93.29	1.2e-05	K	DDENVNSQPFMR	W				9add7bb2-334b-4be0-a06a-12b9ae6262a5
1		gi|1870032	ribulose-1,5-bisphosphate carboxylase/oxygenase large subunit [Odontostomum hartwegii]	226	52260	9	8	7	7	177	1	0	0	1467.59	1466.59	1	1466.61	-0.0243	193	204	0	65.15	0.0069	K	DDENVNSQPFMR	W	Oxidation (M)	0.000000000010.0		8e07f201-6520-4ce6-8f0b-2a0050986e61
1		gi|1870032	ribulose-1,5-bisphosphate carboxylase/oxygenase large subunit [Odontostomum hartwegii]	226	52260	9	8	7	7	178	1	0	0	1467.62	1466.62	1	1466.61	0.006	193	204	0	48.28	0.043	K	DDENVNSQPFMR	W	Oxidation (M)	0.000000000010.0		ad1d5914-626a-4824-8118-2641481df83c
1		gi|1870032	ribulose-1,5-bisphosphate carboxylase/oxygenase large subunit [Odontostomum hartwegii]	226	52260	9	8	7	7	190	1	0	0	1497.7	1496.69	1	1496.7	-0.0151	311	325	0	71.08	0.0016	R	MSGGDHIHSGTVVGK	L	Oxidation (M)	0.100000000000000.0		3010fe4d-82cd-4323-934a-cbbcc31a34ee
1		gi|1870032	ribulose-1,5-bisphosphate carboxylase/oxygenase large subunit [Odontostomum hartwegii]	226	52260	9	8	7	7	202	1	0	0	1546.77	1545.76	1	1545.73	0.0348	442	454	0	91.76	3e-05	K	WSPELAAACEVWK	E				94157d68-1ffb-41d7-be86-fa11548b3061
1		gi|1870032	ribulose-1,5-bisphosphate carboxylase/oxygenase large subunit [Odontostomum hartwegii]	226	52260	9	8	7	7	249	1	0	0	1810.88	1809.88	1	1809.8	0.0726	228	243	0	92.55	2.1e-05	K	GHYLNATAGTCEEMIK	R	Oxidation (M)	0.0000000000000100.0		cf4f86cf-da03-466e-86ba-b861b6db9e02
1		gi|9963994	ribulose-1,5-bisphosphate carboxylase/oxygenase large subunit [Tetrachondra patagonica]	226	32358	10	7	6	5	71	1	0	1	1023.46	1022.45	1	1022.47	-0.0173	236	243	1	50.68	0.092	R	DDFVEKDR	S				bffdb68b-84c5-40f5-a550-eb469cc6c48d
1		gi|9963994	ribulose-1,5-bisphosphate carboxylase/oxygenase large subunit [Tetrachondra patagonica]	226	32358	10	7	6	5	72	1	0	1	1023.46	1022.45	1	1022.47	-0.0157	236	243	1	48.87	0.091	R	DDFVEKDR	S				5f44fb3d-87a9-437e-8b6e-907154a5b7b8
1		gi|9963994	ribulose-1,5-bisphosphate carboxylase/oxygenase large subunit [Tetrachondra patagonica]	226	32358	10	7	6	5	117	2	0	0	1261.75	1260.74	1	1260.71	0.0344	225	235	0	101.85	2.6e-06	R	DITLGFVDLLR	D				aa688366-6c2a-4175-bf1c-50be13a24142
1		gi|9963994	ribulose-1,5-bisphosphate carboxylase/oxygenase large subunit [Tetrachondra patagonica]	226	32358	10	7	6	5	144	1	0	1	1315.73	1314.72	1	1314.7	0.0272	2	13	0	61.79	9.4e-05	M	FTSIVGNVFGFK	A				014fece4-4058-40a5-9ee9-4e58a2907960
1		gi|9963994	ribulose-1,5-bisphosphate carboxylase/oxygenase large subunit [Tetrachondra patagonica]	226	32358	10	7	6	5	169	1	0	0	1451.6	1450.59	1	1450.61	-0.0268	87	98	0	93.29	1.2e-05	K	DDENVNSQPFMR	W				9add7bb2-334b-4be0-a06a-12b9ae6262a5
1		gi|9963994	ribulose-1,5-bisphosphate carboxylase/oxygenase large subunit [Tetrachondra patagonica]	226	32358	10	7	6	5	174	1	0	1	1462.77	1461.76	1	1461.73	0.0269	1	13	0	94.78	1.6e-05	-	MFTSIVGNVFGFK	A	Oxidation (M)	0.1000000000000.0		fe897e45-530a-4e1b-8bcb-c3ca28fba215
1		gi|9963994	ribulose-1,5-bisphosphate carboxylase/oxygenase large subunit [Tetrachondra patagonica]	226	32358	10	7	6	5	175	1	0	1	1462.77	1461.76	1	1461.73	0.0294	1	13	0	77.85	4.1e-05	-	MFTSIVGNVFGFK	A	Oxidation (M)	0.1000000000000.0		c4806180-14c9-4abe-8c44-16d22e727aff
1		gi|9963994	ribulose-1,5-bisphosphate carboxylase/oxygenase large subunit [Tetrachondra patagonica]	226	32358	10	7	6	5	177	1	0	0	1467.59	1466.59	1	1466.61	-0.0243	87	98	0	65.15	0.0069	K	DDENVNSQPFMR	W	Oxidation (M)	0.000000000010.0		8e07f201-6520-4ce6-8f0b-2a0050986e61
1		gi|9963994	ribulose-1,5-bisphosphate carboxylase/oxygenase large subunit [Tetrachondra patagonica]	226	32358	10	7	6	5	178	1	0	0	1467.62	1466.62	1	1466.61	0.006	87	98	0	48.28	0.043	K	DDENVNSQPFMR	W	Oxidation (M)	0.000000000010.0		ad1d5914-626a-4824-8118-2641481df83c
1		gi|9963994	ribulose-1,5-bisphosphate carboxylase/oxygenase large subunit [Tetrachondra patagonica]	226	32358	10	7	6	5	190	1	0	0	1497.7	1496.69	1	1496.7	-0.0151	205	219	0	71.08	0.0016	R	MSGGDHIHSGTVVGK	L	Oxidation (M)	0.100000000000000.0		3010fe4d-82cd-4323-934a-cbbcc31a34ee
1		gi|161777977	ribulose-1,5-bisphosphate carboxylase/oxygenase large subunit [Sipanea hispida]	225	49986	8	7	6	6	70	1	0	0	1021.58	1020.58	1	1020.52	0.0536	23	31	0	77.84	0.00083	K	DTDILAAFR	V				84d29dc6-368b-4900-bd77-c856650145f7
1		gi|161777977	ribulose-1,5-bisphosphate carboxylase/oxygenase large subunit [Sipanea hispida]	225	49986	8	7	6	6	115	1	0	1	1257.69	1256.69	1	1256.67	0.014	426	436	1	95.97	1.4e-05	R	DLAKEGNEIIR	X				bcc600e8-1e0b-4157-b229-5a5a2d1d6899
1		gi|161777977	ribulose-1,5-bisphosphate carboxylase/oxygenase large subunit [Sipanea hispida]	225	49986	8	7	6	6	117	2	0	0	1261.75	1260.74	1	1260.71	0.0344	330	340	0	101.85	2.6e-06	R	DITLGFVDLLR	D				aa688366-6c2a-4175-bf1c-50be13a24142
1		gi|161777977	ribulose-1,5-bisphosphate carboxylase/oxygenase large subunit [Sipanea hispida]	225	49986	8	7	6	6	169	1	0	0	1451.6	1450.59	1	1450.61	-0.0268	192	203	0	93.29	1.2e-05	K	DDENVNSQPFMR	W				9add7bb2-334b-4be0-a06a-12b9ae6262a5
1		gi|161777977	ribulose-1,5-bisphosphate carboxylase/oxygenase large subunit [Sipanea hispida]	225	49986	8	7	6	6	177	1	0	0	1467.59	1466.59	1	1466.61	-0.0243	192	203	0	65.15	0.0069	K	DDENVNSQPFMR	W	Oxidation (M)	0.000000000010.0		8e07f201-6520-4ce6-8f0b-2a0050986e61
1		gi|161777977	ribulose-1,5-bisphosphate carboxylase/oxygenase large subunit [Sipanea hispida]	225	49986	8	7	6	6	178	1	0	0	1467.62	1466.62	1	1466.61	0.006	192	203	0	48.28	0.043	K	DDENVNSQPFMR	W	Oxidation (M)	0.000000000010.0		ad1d5914-626a-4824-8118-2641481df83c
1		gi|161777977	ribulose-1,5-bisphosphate carboxylase/oxygenase large subunit [Sipanea hispida]	225	49986	8	7	6	6	190	1	0	0	1497.7	1496.69	1	1496.7	-0.0151	310	324	0	71.08	0.0016	R	MSGGDHIHSGTVVGK	L	Oxidation (M)	0.100000000000000.0		3010fe4d-82cd-4323-934a-cbbcc31a34ee
1		gi|161777977	ribulose-1,5-bisphosphate carboxylase/oxygenase large subunit [Sipanea hispida]	225	49986	8	7	6	6	249	1	0	0	1810.88	1809.88	1	1809.8	0.0726	227	242	0	92.55	2.1e-05	K	GHYLNATAGTCEEMIK	R	Oxidation (M)	0.0000000000000100.0		cf4f86cf-da03-466e-86ba-b861b6db9e02
1		gi|32332101	ribulose-1,5-bisphosphate carboxylase/oxygenase large subunit [Brunfelsia americana]	225	52359	8	7	6	6	70	1	0	0	1021.58	1020.58	1	1020.52	0.0536	24	32	0	77.84	0.00083	K	DTDILAAFR	V				84d29dc6-368b-4900-bd77-c856650145f7
1		gi|32332101	ribulose-1,5-bisphosphate carboxylase/oxygenase large subunit [Brunfelsia americana]	225	52359	8	7	6	6	115	1	0	1	1257.69	1256.69	1	1256.64	0.0503	427	437	0	95.97	1.4e-05	R	DLAQEGNEIIR	E				bcc600e8-1e0b-4157-b229-5a5a2d1d6899
1		gi|32332101	ribulose-1,5-bisphosphate carboxylase/oxygenase large subunit [Brunfelsia americana]	225	52359	8	7	6	6	116	5	0	0	1261.66	1260.65	1	1260.62	0.0335	209	218	0	75.01	0.0017	R	FLFCAEAIYK	A				208f2f60-1cbb-4e5b-ba4a-a0138d994a65
1		gi|32332101	ribulose-1,5-bisphosphate carboxylase/oxygenase large subunit [Brunfelsia americana]	225	52359	8	7	6	6	117	2	0	0	1261.75	1260.74	1	1260.71	0.0344	331	341	0	101.85	2.6e-06	R	DITLGFVDLLR	D				aa688366-6c2a-4175-bf1c-50be13a24142
1		gi|32332101	ribulose-1,5-bisphosphate carboxylase/oxygenase large subunit [Brunfelsia americana]	225	52359	8	7	6	6	169	1	0	0	1451.6	1450.59	1	1450.61	-0.0268	193	204	0	93.29	1.2e-05	K	DDENVNSQPFMR	W				9add7bb2-334b-4be0-a06a-12b9ae6262a5
1		gi|32332101	ribulose-1,5-bisphosphate carboxylase/oxygenase large subunit [Brunfelsia americana]	225	52359	8	7	6	6	177	1	0	0	1467.59	1466.59	1	1466.61	-0.0243	193	204	0	65.15	0.0069	K	DDENVNSQPFMR	W	Oxidation (M)	0.000000000010.0		8e07f201-6520-4ce6-8f0b-2a0050986e61
1		gi|32332101	ribulose-1,5-bisphosphate carboxylase/oxygenase large subunit [Brunfelsia americana]	225	52359	8	7	6	6	178	1	0	0	1467.62	1466.62	1	1466.61	0.006	193	204	0	48.28	0.043	K	DDENVNSQPFMR	W	Oxidation (M)	0.000000000010.0		ad1d5914-626a-4824-8118-2641481df83c
1		gi|32332101	ribulose-1,5-bisphosphate carboxylase/oxygenase large subunit [Brunfelsia americana]	225	52359	8	7	6	6	202	1	0	0	1546.77	1545.76	1	1545.73	0.0348	442	454	0	91.76	3e-05	K	WSPELAAACEVWK	E				94157d68-1ffb-41d7-be86-fa11548b3061
1		gi|11182405	ribulose-1,5-bisphosphate cerboxylase/oxygenase [Lycium pallidum]	224	52180	8	7	6	6	70	1	0	0	1021.58	1020.58	1	1020.52	0.0536	23	31	0	77.84	0.00083	K	DTDILAAFR	V				84d29dc6-368b-4900-bd77-c856650145f7
1		gi|11182405	ribulose-1,5-bisphosphate cerboxylase/oxygenase [Lycium pallidum]	224	52180	8	7	6	6	115	1	0	1	1257.69	1256.69	1	1256.64	0.0503	426	436	0	95.97	1.4e-05	R	DLAQEGNEIIR	E				bcc600e8-1e0b-4157-b229-5a5a2d1d6899
1		gi|11182405	ribulose-1,5-bisphosphate cerboxylase/oxygenase [Lycium pallidum]	224	52180	8	7	6	6	117	2	0	0	1261.75	1260.74	1	1260.71	0.0344	330	340	0	101.85	2.6e-06	R	DITLGFVDLLR	D				aa688366-6c2a-4175-bf1c-50be13a24142
1		gi|11182405	ribulose-1,5-bisphosphate cerboxylase/oxygenase [Lycium pallidum]	224	52180	8	7	6	6	169	1	0	0	1451.6	1450.59	1	1450.61	-0.0268	192	203	0	93.29	1.2e-05	K	DDENVNSQPFMR	W				9add7bb2-334b-4be0-a06a-12b9ae6262a5
1		gi|11182405	ribulose-1,5-bisphosphate cerboxylase/oxygenase [Lycium pallidum]	224	52180	8	7	6	6	177	1	0	0	1467.59	1466.59	1	1466.61	-0.0243	192	203	0	65.15	0.0069	K	DDENVNSQPFMR	W	Oxidation (M)	0.000000000010.0		8e07f201-6520-4ce6-8f0b-2a0050986e61
1		gi|11182405	ribulose-1,5-bisphosphate cerboxylase/oxygenase [Lycium pallidum]	224	52180	8	7	6	6	178	1	0	0	1467.62	1466.62	1	1466.61	0.006	192	203	0	48.28	0.043	K	DDENVNSQPFMR	W	Oxidation (M)	0.000000000010.0		ad1d5914-626a-4824-8118-2641481df83c
1		gi|11182405	ribulose-1,5-bisphosphate cerboxylase/oxygenase [Lycium pallidum]	224	52180	8	7	6	6	190	1	0	0	1497.7	1496.69	1	1496.7	-0.0151	310	324	0	71.08	0.0016	R	MSGGDHIHSGTVVGK	L	Oxidation (M)	0.100000000000000.0		3010fe4d-82cd-4323-934a-cbbcc31a34ee
1		gi|11182405	ribulose-1,5-bisphosphate cerboxylase/oxygenase [Lycium pallidum]	224	52180	8	7	6	6	202	1	0	0	1546.77	1545.76	1	1545.73	0.0348	441	453	0	91.76	3e-05	K	WSPELAAACEVWK	E				94157d68-1ffb-41d7-be86-fa11548b3061
1		gi|359329078	ribulose bisophosphate carboxylase large subunit, partial (chloroplast) [Khaya nyasica]	224	51265	8	7	6	6	70	1	0	0	1021.58	1020.58	1	1020.52	0.0536	23	31	0	77.84	0.00083	K	DTDILAAFR	V				84d29dc6-368b-4900-bd77-c856650145f7
1		gi|359329078	ribulose bisophosphate carboxylase large subunit, partial (chloroplast) [Khaya nyasica]	224	51265	8	7	6	6	116	1	0	1	1261.66	1260.65	1	1260.62	0.0335	208	217	0	77.06	0.0011	R	FIFCAEAIYK	A				208f2f60-1cbb-4e5b-ba4a-a0138d994a65
1		gi|359329078	ribulose bisophosphate carboxylase large subunit, partial (chloroplast) [Khaya nyasica]	224	51265	8	7	6	6	117	2	0	0	1261.75	1260.74	1	1260.71	0.0344	330	340	0	101.85	2.6e-06	R	DITLGFVDLLR	D				aa688366-6c2a-4175-bf1c-50be13a24142
1		gi|359329078	ribulose bisophosphate carboxylase large subunit, partial (chloroplast) [Khaya nyasica]	224	51265	8	7	6	6	169	1	0	0	1451.6	1450.59	1	1450.61	-0.0268	192	203	0	93.29	1.2e-05	K	DDENVNSQPFMR	W				9add7bb2-334b-4be0-a06a-12b9ae6262a5
1		gi|359329078	ribulose bisophosphate carboxylase large subunit, partial (chloroplast) [Khaya nyasica]	224	51265	8	7	6	6	177	1	0	0	1467.59	1466.59	1	1466.61	-0.0243	192	203	0	65.15	0.0069	K	DDENVNSQPFMR	W	Oxidation (M)	0.000000000010.0		8e07f201-6520-4ce6-8f0b-2a0050986e61
1		gi|359329078	ribulose bisophosphate carboxylase large subunit, partial (chloroplast) [Khaya nyasica]	224	51265	8	7	6	6	178	1	0	0	1467.62	1466.62	1	1466.61	0.006	192	203	0	48.28	0.043	K	DDENVNSQPFMR	W	Oxidation (M)	0.000000000010.0		ad1d5914-626a-4824-8118-2641481df83c
1		gi|359329078	ribulose bisophosphate carboxylase large subunit, partial (chloroplast) [Khaya nyasica]	224	51265	8	7	6	6	202	1	0	0	1546.77	1545.76	1	1545.73	0.0348	441	453	0	91.76	3e-05	K	WSPELAAACEVWK	E				94157d68-1ffb-41d7-be86-fa11548b3061
1		gi|359329078	ribulose bisophosphate carboxylase large subunit, partial (chloroplast) [Khaya nyasica]	224	51265	8	7	6	6	249	1	0	0	1810.88	1809.88	1	1809.8	0.0726	227	242	0	92.55	2.1e-05	K	GHYLNATAGTCEEMIK	R	Oxidation (M)	0.0000000000000100.0		cf4f86cf-da03-466e-86ba-b861b6db9e02
1		gi|1490370	ribulose-bisphosphate carboxylase [Melampyrum pratense]	224	53496	8	7	6	6	70	1	0	0	1021.58	1020.58	1	1020.52	0.0536	33	41	0	77.84	0.00083	K	DTDILAAFR	V				84d29dc6-368b-4900-bd77-c856650145f7
1		gi|1490370	ribulose-bisphosphate carboxylase [Melampyrum pratense]	224	53496	8	7	6	6	115	1	0	1	1257.69	1256.69	1	1256.64	0.0503	436	446	0	95.97	1.4e-05	R	DLAQEGNEIIR	E				bcc600e8-1e0b-4157-b229-5a5a2d1d6899
1		gi|1490370	ribulose-bisphosphate carboxylase [Melampyrum pratense]	224	53496	8	7	6	6	116	5	0	0	1261.66	1260.65	1	1260.62	0.0335	218	227	0	75.01	0.0017	R	FLFCAEAIYK	S				208f2f60-1cbb-4e5b-ba4a-a0138d994a65
1		gi|1490370	ribulose-bisphosphate carboxylase [Melampyrum pratense]	224	53496	8	7	6	6	169	1	0	0	1451.6	1450.59	1	1450.61	-0.0268	202	213	0	93.29	1.2e-05	K	DDENVNSQPFMR	W				9add7bb2-334b-4be0-a06a-12b9ae6262a5
1		gi|1490370	ribulose-bisphosphate carboxylase [Melampyrum pratense]	224	53496	8	7	6	6	177	1	0	0	1467.59	1466.59	1	1466.61	-0.0243	202	213	0	65.15	0.0069	K	DDENVNSQPFMR	W	Oxidation (M)	0.000000000010.0		8e07f201-6520-4ce6-8f0b-2a0050986e61
1		gi|1490370	ribulose-bisphosphate carboxylase [Melampyrum pratense]	224	53496	8	7	6	6	178	1	0	0	1467.62	1466.62	1	1466.61	0.006	202	213	0	48.28	0.043	K	DDENVNSQPFMR	W	Oxidation (M)	0.000000000010.0		ad1d5914-626a-4824-8118-2641481df83c
1		gi|1490370	ribulose-bisphosphate carboxylase [Melampyrum pratense]	224	53496	8	7	6	6	202	1	0	0	1546.77	1545.76	1	1545.73	0.0348	451	463	0	91.76	3e-05	K	WSPELAAACEVWK	E				94157d68-1ffb-41d7-be86-fa11548b3061
1		gi|1490370	ribulose-bisphosphate carboxylase [Melampyrum pratense]	224	53496	8	7	6	6	212	1	0	1	1579.86	1578.85	1	1578.83	0.0246	464	477	0	101.07	3.3e-06	K	EIVFNFAAVDVLDK	-				9eea579f-21ef-4600-8d7c-d765cc21fcab
1		gi|10048136	ribulose 1,5-bisphosphate carboxylase [Cneorum pulverulentum]	222	52466	8	7	6	6	70	1	0	0	1021.58	1020.58	1	1020.52	0.0536	27	35	0	77.84	0.00083	K	DTDILAAFR	V				84d29dc6-368b-4900-bd77-c856650145f7
1		gi|10048136	ribulose 1,5-bisphosphate carboxylase [Cneorum pulverulentum]	222	52466	8	7	6	6	116	5	0	0	1261.66	1260.65	1	1260.62	0.0335	212	221	0	75.01	0.0017	R	FLFCAEAIYK	A				208f2f60-1cbb-4e5b-ba4a-a0138d994a65
1		gi|10048136	ribulose 1,5-bisphosphate carboxylase [Cneorum pulverulentum]	222	52466	8	7	6	6	117	2	0	0	1261.75	1260.74	1	1260.71	0.0344	334	344	0	101.85	2.6e-06	R	DITLGFVDLLR	D				aa688366-6c2a-4175-bf1c-50be13a24142
1		gi|10048136	ribulose 1,5-bisphosphate carboxylase [Cneorum pulverulentum]	222	52466	8	7	6	6	169	1	0	0	1451.6	1450.59	1	1450.61	-0.0268	196	207	0	93.29	1.2e-05	K	DDENVNSQPFMR	W				9add7bb2-334b-4be0-a06a-12b9ae6262a5
1		gi|10048136	ribulose 1,5-bisphosphate carboxylase [Cneorum pulverulentum]	222	52466	8	7	6	6	177	1	0	0	1467.59	1466.59	1	1466.61	-0.0243	196	207	0	65.15	0.0069	K	DDENVNSQPFMR	W	Oxidation (M)	0.000000000010.0		8e07f201-6520-4ce6-8f0b-2a0050986e61
1		gi|10048136	ribulose 1,5-bisphosphate carboxylase [Cneorum pulverulentum]	222	52466	8	7	6	6	178	1	0	0	1467.62	1466.62	1	1466.61	0.006	196	207	0	48.28	0.043	K	DDENVNSQPFMR	W	Oxidation (M)	0.000000000010.0		ad1d5914-626a-4824-8118-2641481df83c
1		gi|10048136	ribulose 1,5-bisphosphate carboxylase [Cneorum pulverulentum]	222	52466	8	7	6	6	202	1	0	0	1546.77	1545.76	1	1545.73	0.0348	445	457	0	91.76	3e-05	K	WSPELAAACEVWK	E				94157d68-1ffb-41d7-be86-fa11548b3061
1		gi|10048136	ribulose 1,5-bisphosphate carboxylase [Cneorum pulverulentum]	222	52466	8	7	6	6	249	1	0	0	1810.88	1809.88	1	1809.8	0.0726	231	246	0	92.55	2.1e-05	K	GHYLNATAGTCEEMIK	R	Oxidation (M)	0.0000000000000100.0		cf4f86cf-da03-466e-86ba-b861b6db9e02
1		gi|1050744	ribulose-1,5-bisphosphate carboxylase [Pogonopus speciosus]	222	52407	8	7	6	6	70	1	0	0	1021.58	1020.58	1	1020.52	0.0536	24	32	0	77.84	0.00083	K	DTDILAAFR	V				84d29dc6-368b-4900-bd77-c856650145f7
1		gi|1050744	ribulose-1,5-bisphosphate carboxylase [Pogonopus speciosus]	222	52407	8	7	6	6	117	2	0	0	1261.75	1260.74	1	1260.71	0.0344	331	341	0	101.85	2.6e-06	R	DITLGFVDLLR	D				aa688366-6c2a-4175-bf1c-50be13a24142
1		gi|1050744	ribulose-1,5-bisphosphate carboxylase [Pogonopus speciosus]	222	52407	8	7	6	6	169	1	0	0	1451.6	1450.59	1	1450.61	-0.0268	193	204	0	93.29	1.2e-05	K	DDENVNSQPFMR	W				9add7bb2-334b-4be0-a06a-12b9ae6262a5
1		gi|1050744	ribulose-1,5-bisphosphate carboxylase [Pogonopus speciosus]	222	52407	8	7	6	6	177	1	0	0	1467.59	1466.59	1	1466.61	-0.0243	193	204	0	65.15	0.0069	K	DDENVNSQPFMR	W	Oxidation (M)	0.000000000010.0		8e07f201-6520-4ce6-8f0b-2a0050986e61
1		gi|1050744	ribulose-1,5-bisphosphate carboxylase [Pogonopus speciosus]	222	52407	8	7	6	6	178	1	0	0	1467.62	1466.62	1	1466.61	0.006	193	204	0	48.28	0.043	K	DDENVNSQPFMR	W	Oxidation (M)	0.000000000010.0		ad1d5914-626a-4824-8118-2641481df83c
1		gi|1050744	ribulose-1,5-bisphosphate carboxylase [Pogonopus speciosus]	222	52407	8	7	6	6	190	1	0	0	1497.7	1496.69	1	1496.7	-0.0151	311	325	0	71.08	0.0016	R	MSGGDHIHSGTVVGK	L	Oxidation (M)	0.100000000000000.0		3010fe4d-82cd-4323-934a-cbbcc31a34ee
1		gi|1050744	ribulose-1,5-bisphosphate carboxylase [Pogonopus speciosus]	222	52407	8	7	6	6	202	1	0	0	1546.77	1545.76	1	1545.73	0.0348	442	454	0	91.76	3e-05	K	WSPELAAACEVWK	E				94157d68-1ffb-41d7-be86-fa11548b3061
1		gi|1050744	ribulose-1,5-bisphosphate carboxylase [Pogonopus speciosus]	222	52407	8	7	6	6	249	1	0	0	1810.88	1809.88	1	1809.8	0.0726	228	243	0	92.55	2.1e-05	K	GHYLNATAGTCEEMIK	R	Oxidation (M)	0.0000000000000100.0		cf4f86cf-da03-466e-86ba-b861b6db9e02
1		gi|3914547	RecName: Full=Ribulose bisphosphate carboxylase large chain; Short=RuBisCO large subunit	219	52511	9	6	6	5	70	1	0	0	1021.58	1020.58	1	1020.52	0.0536	24	32	0	77.84	0.00083	K	DTDILAAFR	V				84d29dc6-368b-4900-bd77-c856650145f7
1		gi|3914547	RecName: Full=Ribulose bisphosphate carboxylase large chain; Short=RuBisCO large subunit	219	52511	9	6	6	5	71	1	0	1	1023.46	1022.45	1	1022.43	0.019	342	349	0	50.68	0.092	R	DDFVEQDR	S				bffdb68b-84c5-40f5-a550-eb469cc6c48d
1		gi|3914547	RecName: Full=Ribulose bisphosphate carboxylase large chain; Short=RuBisCO large subunit	219	52511	9	6	6	5	72	1	0	1	1023.46	1022.45	1	1022.43	0.0206	342	349	0	48.87	0.091	R	DDFVEQDR	S				5f44fb3d-87a9-437e-8b6e-907154a5b7b8
1		gi|3914547	RecName: Full=Ribulose bisphosphate carboxylase large chain; Short=RuBisCO large subunit	219	52511	9	6	6	5	117	2	0	0	1261.75	1260.74	1	1260.71	0.0344	331	341	0	101.85	2.6e-06	R	DITLGFVDLLR	D				aa688366-6c2a-4175-bf1c-50be13a24142
1		gi|3914547	RecName: Full=Ribulose bisphosphate carboxylase large chain; Short=RuBisCO large subunit	219	52511	9	6	6	5	169	1	0	0	1451.6	1450.59	1	1450.61	-0.0268	193	204	0	93.29	1.2e-05	K	DDENVNSQPFMR	W				9add7bb2-334b-4be0-a06a-12b9ae6262a5
1		gi|3914547	RecName: Full=Ribulose bisphosphate carboxylase large chain; Short=RuBisCO large subunit	219	52511	9	6	6	5	177	1	0	0	1467.59	1466.59	1	1466.61	-0.0243	193	204	0	65.15	0.0069	K	DDENVNSQPFMR	W	Oxidation (M)	0.000000000010.0		8e07f201-6520-4ce6-8f0b-2a0050986e61
1		gi|3914547	RecName: Full=Ribulose bisphosphate carboxylase large chain; Short=RuBisCO large subunit	219	52511	9	6	6	5	178	1	0	0	1467.62	1466.62	1	1466.61	0.006	193	204	0	48.28	0.043	K	DDENVNSQPFMR	W	Oxidation (M)	0.000000000010.0		ad1d5914-626a-4824-8118-2641481df83c
1		gi|3914547	RecName: Full=Ribulose bisphosphate carboxylase large chain; Short=RuBisCO large subunit	219	52511	9	6	6	5	202	1	0	0	1546.77	1545.76	1	1545.73	0.0348	442	454	0	91.76	3e-05	K	WSPELAAACEVWK	E				94157d68-1ffb-41d7-be86-fa11548b3061
1		gi|3914547	RecName: Full=Ribulose bisphosphate carboxylase large chain; Short=RuBisCO large subunit	219	52511	9	6	6	5	212	1	0	1	1579.86	1578.85	1	1578.83	0.0246	455	468	0	101.07	3.3e-06	K	EIVFNFAAVDVLDK	-				9eea579f-21ef-4600-8d7c-d765cc21fcab
1		gi|1050538	ribulose-1,5-bisphosphate carboxylase [Luculia grandifolia]	219	52541	8	7	6	6	116	5	0	0	1261.66	1260.65	1	1260.62	0.0335	209	218	0	75.01	0.0017	R	FLFCAEAIYK	A				208f2f60-1cbb-4e5b-ba4a-a0138d994a65
1		gi|1050538	ribulose-1,5-bisphosphate carboxylase [Luculia grandifolia]	219	52541	8	7	6	6	117	2	0	0	1261.75	1260.74	1	1260.71	0.0344	331	341	0	101.85	2.6e-06	R	DITLGFVDLLR	D				aa688366-6c2a-4175-bf1c-50be13a24142
1		gi|1050538	ribulose-1,5-bisphosphate carboxylase [Luculia grandifolia]	219	52541	8	7	6	6	169	1	0	0	1451.6	1450.59	1	1450.61	-0.0268	193	204	0	93.29	1.2e-05	K	DDENVNSQPFMR	W				9add7bb2-334b-4be0-a06a-12b9ae6262a5
1		gi|1050538	ribulose-1,5-bisphosphate carboxylase [Luculia grandifolia]	219	52541	8	7	6	6	177	1	0	0	1467.59	1466.59	1	1466.61	-0.0243	193	204	0	65.15	0.0069	K	DDENVNSQPFMR	W	Oxidation (M)	0.000000000010.0		8e07f201-6520-4ce6-8f0b-2a0050986e61
1		gi|1050538	ribulose-1,5-bisphosphate carboxylase [Luculia grandifolia]	219	52541	8	7	6	6	178	1	0	0	1467.62	1466.62	1	1466.61	0.006	193	204	0	48.28	0.043	K	DDENVNSQPFMR	W	Oxidation (M)	0.000000000010.0		ad1d5914-626a-4824-8118-2641481df83c
1		gi|1050538	ribulose-1,5-bisphosphate carboxylase [Luculia grandifolia]	219	52541	8	7	6	6	190	1	0	0	1497.7	1496.69	1	1496.7	-0.0151	311	325	0	71.08	0.0016	R	MSGGDHIHSGTVVGK	L	Oxidation (M)	0.100000000000000.0		3010fe4d-82cd-4323-934a-cbbcc31a34ee
1		gi|1050538	ribulose-1,5-bisphosphate carboxylase [Luculia grandifolia]	219	52541	8	7	6	6	202	1	0	0	1546.77	1545.76	1	1545.73	0.0348	442	454	0	91.76	3e-05	K	WSPELAAACEVWK	E				94157d68-1ffb-41d7-be86-fa11548b3061
1		gi|1050538	ribulose-1,5-bisphosphate carboxylase [Luculia grandifolia]	219	52541	8	7	6	6	249	1	0	0	1810.88	1809.88	1	1809.8	0.0726	228	243	0	92.55	2.1e-05	K	GHYLNATAGTCEEMIK	R	Oxidation (M)	0.0000000000000100.0		cf4f86cf-da03-466e-86ba-b861b6db9e02
1		gi|21634083	ribulose-1,5-bisphosphate carboxylase/oxygenase large subunit [Dichondra brachypoda]	215	51692	8	7	6	6	70	1	0	0	1021.58	1020.58	1	1020.52	0.0536	15	23	0	77.84	0.00083	K	DTDILAAFR	V				84d29dc6-368b-4900-bd77-c856650145f7
1		gi|21634083	ribulose-1,5-bisphosphate carboxylase/oxygenase large subunit [Dichondra brachypoda]	215	51692	8	7	6	6	115	1	0	1	1257.69	1256.69	1	1256.64	0.0503	418	428	0	95.97	1.4e-05	R	DLAQEGNEIIR	Q				bcc600e8-1e0b-4157-b229-5a5a2d1d6899
1		gi|21634083	ribulose-1,5-bisphosphate carboxylase/oxygenase large subunit [Dichondra brachypoda]	215	51692	8	7	6	6	116	5	0	0	1261.66	1260.65	1	1260.62	0.0335	200	209	0	75.01	0.0017	R	FLFCAEAIYK	S				208f2f60-1cbb-4e5b-ba4a-a0138d994a65
1		gi|21634083	ribulose-1,5-bisphosphate carboxylase/oxygenase large subunit [Dichondra brachypoda]	215	51692	8	7	6	6	169	1	0	0	1451.6	1450.59	1	1450.61	-0.0268	184	195	0	93.29	1.2e-05	K	DDENVNSQPFMR	W				9add7bb2-334b-4be0-a06a-12b9ae6262a5
1		gi|21634083	ribulose-1,5-bisphosphate carboxylase/oxygenase large subunit [Dichondra brachypoda]	215	51692	8	7	6	6	177	1	0	0	1467.59	1466.59	1	1466.61	-0.0243	184	195	0	65.15	0.0069	K	DDENVNSQPFMR	W	Oxidation (M)	0.000000000010.0		8e07f201-6520-4ce6-8f0b-2a0050986e61
1		gi|21634083	ribulose-1,5-bisphosphate carboxylase/oxygenase large subunit [Dichondra brachypoda]	215	51692	8	7	6	6	178	1	0	0	1467.62	1466.62	1	1466.61	0.006	184	195	0	48.28	0.043	K	DDENVNSQPFMR	W	Oxidation (M)	0.000000000010.0		ad1d5914-626a-4824-8118-2641481df83c
1		gi|21634083	ribulose-1,5-bisphosphate carboxylase/oxygenase large subunit [Dichondra brachypoda]	215	51692	8	7	6	6	202	1	0	0	1546.77	1545.76	1	1545.73	0.0348	433	445	0	91.76	3e-05	K	WSPELAAACEVWK	E				94157d68-1ffb-41d7-be86-fa11548b3061
1		gi|21634083	ribulose-1,5-bisphosphate carboxylase/oxygenase large subunit [Dichondra brachypoda]	215	51692	8	7	6	6	249	1	0	0	1810.88	1809.88	1	1809.8	0.0726	219	234	0	92.55	2.1e-05	K	GHYLNATAGTCEEMIK	R	Oxidation (M)	0.0000000000000100.0		cf4f86cf-da03-466e-86ba-b861b6db9e02
1		gi|31087899	ribulose-1,5-bisphosphate carboxylase/oxygenase large subunit [Hordeum brachyantherum subsp. californicum]	215	53308	8	7	6	6	70	1	0	0	1021.58	1020.58	1	1020.52	0.0536	33	41	0	77.84	0.00083	K	DTDILAAFR	V				84d29dc6-368b-4900-bd77-c856650145f7
1		gi|31087899	ribulose-1,5-bisphosphate carboxylase/oxygenase large subunit [Hordeum brachyantherum subsp. californicum]	215	53308	8	7	6	6	115	1	0	1	1257.69	1256.69	1	1256.67	0.014	436	446	1	95.97	1.4e-05	R	DLAKEGNEIIR	A				bcc600e8-1e0b-4157-b229-5a5a2d1d6899
1		gi|31087899	ribulose-1,5-bisphosphate carboxylase/oxygenase large subunit [Hordeum brachyantherum subsp. californicum]	215	53308	8	7	6	6	169	1	0	0	1451.6	1450.59	1	1450.61	-0.0268	202	213	0	93.29	1.2e-05	K	DDENVNSQPFMR	W				9add7bb2-334b-4be0-a06a-12b9ae6262a5
1		gi|31087899	ribulose-1,5-bisphosphate carboxylase/oxygenase large subunit [Hordeum brachyantherum subsp. californicum]	215	53308	8	7	6	6	177	1	0	0	1467.59	1466.59	1	1466.61	-0.0243	202	213	0	65.15	0.0069	K	DDENVNSQPFMR	W	Oxidation (M)	0.000000000010.0		8e07f201-6520-4ce6-8f0b-2a0050986e61
1		gi|31087899	ribulose-1,5-bisphosphate carboxylase/oxygenase large subunit [Hordeum brachyantherum subsp. californicum]	215	53308	8	7	6	6	178	1	0	0	1467.62	1466.62	1	1466.61	0.006	202	213	0	48.28	0.043	K	DDENVNSQPFMR	W	Oxidation (M)	0.000000000010.0		ad1d5914-626a-4824-8118-2641481df83c
1		gi|31087899	ribulose-1,5-bisphosphate carboxylase/oxygenase large subunit [Hordeum brachyantherum subsp. californicum]	215	53308	8	7	6	6	190	1	0	0	1497.7	1496.69	1	1496.7	-0.0151	320	334	0	71.08	0.0016	R	MSGGDHIHSGTVVGK	L	Oxidation (M)	0.100000000000000.0		3010fe4d-82cd-4323-934a-cbbcc31a34ee
1		gi|31087899	ribulose-1,5-bisphosphate carboxylase/oxygenase large subunit [Hordeum brachyantherum subsp. californicum]	215	53308	8	7	6	6	202	1	0	0	1546.77	1545.76	1	1545.73	0.0348	451	463	0	91.76	3e-05	K	WSPELAAACEVWK	A				94157d68-1ffb-41d7-be86-fa11548b3061
1		gi|31087899	ribulose-1,5-bisphosphate carboxylase/oxygenase large subunit [Hordeum brachyantherum subsp. californicum]	215	53308	8	7	6	6	249	1	0	0	1810.88	1809.88	1	1809.8	0.0726	237	252	0	92.55	2.1e-05	K	GHYLNATAGTCEEMIK	R	Oxidation (M)	0.0000000000000100.0		cf4f86cf-da03-466e-86ba-b861b6db9e02
1		gi|11182399	ribulose-1,5-bisphosphate carboxylase/oxygenase [Lycium chinense]	213	52223	9	6	6	5	70	1	0	0	1021.58	1020.58	1	1020.52	0.0536	23	31	0	77.84	0.00083	K	DTDILAAFR	V				84d29dc6-368b-4900-bd77-c856650145f7
1		gi|11182399	ribulose-1,5-bisphosphate carboxylase/oxygenase [Lycium chinense]	213	52223	9	6	6	5	71	1	0	1	1023.46	1022.45	1	1022.43	0.019	341	348	0	50.68	0.092	R	DDFVEQDR	S				bffdb68b-84c5-40f5-a550-eb469cc6c48d
1		gi|11182399	ribulose-1,5-bisphosphate carboxylase/oxygenase [Lycium chinense]	213	52223	9	6	6	5	72	1	0	1	1023.46	1022.45	1	1022.43	0.0206	341	348	0	48.87	0.091	R	DDFVEQDR	S				5f44fb3d-87a9-437e-8b6e-907154a5b7b8
1		gi|11182399	ribulose-1,5-bisphosphate carboxylase/oxygenase [Lycium chinense]	213	52223	9	6	6	5	115	1	0	1	1257.69	1256.69	1	1256.64	0.0503	426	436	0	95.97	1.4e-05	R	DLAQEGNEIIR	E				bcc600e8-1e0b-4157-b229-5a5a2d1d6899
1		gi|11182399	ribulose-1,5-bisphosphate carboxylase/oxygenase [Lycium chinense]	213	52223	9	6	6	5	117	2	0	0	1261.75	1260.74	1	1260.71	0.0344	330	340	0	101.85	2.6e-06	R	DITLGFVDLLR	D				aa688366-6c2a-4175-bf1c-50be13a24142
1		gi|11182399	ribulose-1,5-bisphosphate carboxylase/oxygenase [Lycium chinense]	213	52223	9	6	6	5	169	1	0	0	1451.6	1450.59	1	1450.61	-0.0268	192	203	0	93.29	1.2e-05	K	DDENVNSQPFMR	W				9add7bb2-334b-4be0-a06a-12b9ae6262a5
1		gi|11182399	ribulose-1,5-bisphosphate carboxylase/oxygenase [Lycium chinense]	213	52223	9	6	6	5	177	1	0	0	1467.59	1466.59	1	1466.61	-0.0243	192	203	0	65.15	0.0069	K	DDENVNSQPFMR	W	Oxidation (M)	0.000000000010.0		8e07f201-6520-4ce6-8f0b-2a0050986e61
1		gi|11182399	ribulose-1,5-bisphosphate carboxylase/oxygenase [Lycium chinense]	213	52223	9	6	6	5	178	1	0	0	1467.62	1466.62	1	1466.61	0.006	192	203	0	48.28	0.043	K	DDENVNSQPFMR	W	Oxidation (M)	0.000000000010.0		ad1d5914-626a-4824-8118-2641481df83c
1		gi|11182399	ribulose-1,5-bisphosphate carboxylase/oxygenase [Lycium chinense]	213	52223	9	6	6	5	202	1	0	0	1546.77	1545.76	1	1545.73	0.0348	441	453	0	91.76	3e-05	K	WSPELAAACEVWK	E				94157d68-1ffb-41d7-be86-fa11548b3061
1		gi|511778938	ribulose-1,5-bisphosphate carboxylase/oxygenase large subunit, partial (chloroplast) [Leonia glycycarpa]	213	48160	8	7	6	6	70	1	0	0	1021.58	1020.58	1	1020.52	0.0536	22	30	0	77.84	0.00083	K	DTDILAAFR	V				84d29dc6-368b-4900-bd77-c856650145f7
1		gi|511778938	ribulose-1,5-bisphosphate carboxylase/oxygenase large subunit, partial (chloroplast) [Leonia glycycarpa]	213	48160	8	7	6	6	117	2	0	0	1261.75	1260.74	1	1260.71	0.0344	329	339	0	101.85	2.6e-06	R	DITLGFVDLLR	D				aa688366-6c2a-4175-bf1c-50be13a24142
1		gi|511778938	ribulose-1,5-bisphosphate carboxylase/oxygenase large subunit, partial (chloroplast) [Leonia glycycarpa]	213	48160	8	7	6	6	144	1	0	1	1315.73	1314.72	1	1314.7	0.0272	106	117	0	61.79	9.4e-05	R	FTSIVGNVFGFK	A				014fece4-4058-40a5-9ee9-4e58a2907960
1		gi|511778938	ribulose-1,5-bisphosphate carboxylase/oxygenase large subunit, partial (chloroplast) [Leonia glycycarpa]	213	48160	8	7	6	6	169	1	0	0	1451.6	1450.59	1	1450.61	-0.0268	191	202	0	93.29	1.2e-05	K	DDENVNSQPFMR	W				9add7bb2-334b-4be0-a06a-12b9ae6262a5
1		gi|511778938	ribulose-1,5-bisphosphate carboxylase/oxygenase large subunit, partial (chloroplast) [Leonia glycycarpa]	213	48160	8	7	6	6	177	1	0	0	1467.59	1466.59	1	1466.61	-0.0243	191	202	0	65.15	0.0069	K	DDENVNSQPFMR	W	Oxidation (M)	0.000000000010.0		8e07f201-6520-4ce6-8f0b-2a0050986e61
1		gi|511778938	ribulose-1,5-bisphosphate carboxylase/oxygenase large subunit, partial (chloroplast) [Leonia glycycarpa]	213	48160	8	7	6	6	178	1	0	0	1467.62	1466.62	1	1466.61	0.006	191	202	0	48.28	0.043	K	DDENVNSQPFMR	W	Oxidation (M)	0.000000000010.0		ad1d5914-626a-4824-8118-2641481df83c
1		gi|511778938	ribulose-1,5-bisphosphate carboxylase/oxygenase large subunit, partial (chloroplast) [Leonia glycycarpa]	213	48160	8	7	6	6	190	1	0	0	1497.7	1496.69	1	1496.7	-0.0151	309	323	0	71.08	0.0016	R	MSGGDHIHSGTVVGK	L	Oxidation (M)	0.100000000000000.0		3010fe4d-82cd-4323-934a-cbbcc31a34ee
1		gi|511778938	ribulose-1,5-bisphosphate carboxylase/oxygenase large subunit, partial (chloroplast) [Leonia glycycarpa]	213	48160	8	7	6	6	249	1	0	0	1810.88	1809.88	1	1809.8	0.0726	226	241	0	92.55	2.1e-05	K	GHYLNATAGTCEEMIK	R	Oxidation (M)	0.0000000000000100.0		cf4f86cf-da03-466e-86ba-b861b6db9e02
1		gi|3914570	RecName: Full=Ribulose bisphosphate carboxylase large chain; Short=RuBisCO large subunit; Flags: Precursor	212	53439	8	7	6	6	70	1	0	0	1021.58	1020.58	1	1020.52	0.0536	33	41	0	77.84	0.00083	K	DTDILAAFR	V				84d29dc6-368b-4900-bd77-c856650145f7
1		gi|3914570	RecName: Full=Ribulose bisphosphate carboxylase large chain; Short=RuBisCO large subunit; Flags: Precursor	212	53439	8	7	6	6	116	5	0	0	1261.66	1260.65	1	1260.62	0.0335	218	227	0	75.01	0.0017	R	FLFCAEAIYK	S				208f2f60-1cbb-4e5b-ba4a-a0138d994a65
1		gi|3914570	RecName: Full=Ribulose bisphosphate carboxylase large chain; Short=RuBisCO large subunit; Flags: Precursor	212	53439	8	7	6	6	117	2	0	0	1261.75	1260.74	1	1260.71	0.0344	340	350	0	101.85	2.6e-06	R	DITLGFVDLLR	D				aa688366-6c2a-4175-bf1c-50be13a24142
1		gi|3914570	RecName: Full=Ribulose bisphosphate carboxylase large chain; Short=RuBisCO large subunit; Flags: Precursor	212	53439	8	7	6	6	169	1	0	0	1451.6	1450.59	1	1450.61	-0.0268	202	213	0	93.29	1.2e-05	K	DDENVNSQPFMR	W				9add7bb2-334b-4be0-a06a-12b9ae6262a5
1		gi|3914570	RecName: Full=Ribulose bisphosphate carboxylase large chain; Short=RuBisCO large subunit; Flags: Precursor	212	53439	8	7	6	6	177	1	0	0	1467.59	1466.59	1	1466.61	-0.0243	202	213	0	65.15	0.0069	K	DDENVNSQPFMR	W	Oxidation (M)	0.000000000010.0		8e07f201-6520-4ce6-8f0b-2a0050986e61
1		gi|3914570	RecName: Full=Ribulose bisphosphate carboxylase large chain; Short=RuBisCO large subunit; Flags: Precursor	212	53439	8	7	6	6	178	1	0	0	1467.62	1466.62	1	1466.61	0.006	202	213	0	48.28	0.043	K	DDENVNSQPFMR	W	Oxidation (M)	0.000000000010.0		ad1d5914-626a-4824-8118-2641481df83c
1		gi|3914570	RecName: Full=Ribulose bisphosphate carboxylase large chain; Short=RuBisCO large subunit; Flags: Precursor	212	53439	8	7	6	6	190	1	0	0	1497.7	1496.69	1	1496.7	-0.0151	320	334	0	71.08	0.0016	R	MSGGDHIHSGTVVGK	L	Oxidation (M)	0.100000000000000.0		3010fe4d-82cd-4323-934a-cbbcc31a34ee
1		gi|3914570	RecName: Full=Ribulose bisphosphate carboxylase large chain; Short=RuBisCO large subunit; Flags: Precursor	212	53439	8	7	6	6	212	1	0	1	1579.86	1578.85	1	1578.83	0.0246	464	477	0	101.07	3.3e-06	R	EIVFNFAAVDVLDK	-				9eea579f-21ef-4600-8d7c-d765cc21fcab
1		gi|1771096	ribulose-1,5-bisphosphate carboxylase/oxygenase large subunit [Kailarsenia ochreata]	211	52612	7	6	5	5	70	1	0	0	1021.58	1020.58	1	1020.52	0.0536	24	32	0	77.84	0.00083	K	DTDILAAFR	V				84d29dc6-368b-4900-bd77-c856650145f7
1		gi|1771096	ribulose-1,5-bisphosphate carboxylase/oxygenase large subunit [Kailarsenia ochreata]	211	52612	7	6	5	5	117	1	0	1	1261.75	1260.74	1	1260.71	0.0344	331	341	0	102.38	2.3e-06	R	DITIGFVDLLR	D				aa688366-6c2a-4175-bf1c-50be13a24142
1		gi|1771096	ribulose-1,5-bisphosphate carboxylase/oxygenase large subunit [Kailarsenia ochreata]	211	52612	7	6	5	5	169	1	0	0	1451.6	1450.59	1	1450.61	-0.0268	193	204	0	93.29	1.2e-05	K	DDENVNSQPFMR	W				9add7bb2-334b-4be0-a06a-12b9ae6262a5
1		gi|1771096	ribulose-1,5-bisphosphate carboxylase/oxygenase large subunit [Kailarsenia ochreata]	211	52612	7	6	5	5	177	1	0	0	1467.59	1466.59	1	1466.61	-0.0243	193	204	0	65.15	0.0069	K	DDENVNSQPFMR	W	Oxidation (M)	0.000000000010.0		8e07f201-6520-4ce6-8f0b-2a0050986e61
1		gi|1771096	ribulose-1,5-bisphosphate carboxylase/oxygenase large subunit [Kailarsenia ochreata]	211	52612	7	6	5	5	178	1	0	0	1467.62	1466.62	1	1466.61	0.006	193	204	0	48.28	0.043	K	DDENVNSQPFMR	W	Oxidation (M)	0.000000000010.0		ad1d5914-626a-4824-8118-2641481df83c
1		gi|1771096	ribulose-1,5-bisphosphate carboxylase/oxygenase large subunit [Kailarsenia ochreata]	211	52612	7	6	5	5	202	1	0	0	1546.77	1545.76	1	1545.73	0.0348	442	454	0	91.76	3e-05	K	WSPELAAACEVWK	E				94157d68-1ffb-41d7-be86-fa11548b3061
1		gi|1771096	ribulose-1,5-bisphosphate carboxylase/oxygenase large subunit [Kailarsenia ochreata]	211	52612	7	6	5	5	249	1	0	0	1810.88	1809.88	1	1809.8	0.0726	228	243	0	92.55	2.1e-05	K	GHYLNATAGTCEEMIK	R	Oxidation (M)	0.0000000000000100.0		cf4f86cf-da03-466e-86ba-b861b6db9e02
1		gi|1050476	ribulose-1,5-bisphosphate carboxylase [Exostema caribaeum]	211	52559	7	6	5	5	70	1	0	0	1021.58	1020.58	1	1020.52	0.0536	24	32	0	77.84	0.00083	K	DTDILAAFR	V				84d29dc6-368b-4900-bd77-c856650145f7
1		gi|1050476	ribulose-1,5-bisphosphate carboxylase [Exostema caribaeum]	211	52559	7	6	5	5	117	2	0	0	1261.75	1260.74	1	1260.71	0.0344	331	341	0	101.85	2.6e-06	R	DITLGFVDLLR	D				aa688366-6c2a-4175-bf1c-50be13a24142
1		gi|1050476	ribulose-1,5-bisphosphate carboxylase [Exostema caribaeum]	211	52559	7	6	5	5	169	1	0	0	1451.6	1450.59	1	1450.61	-0.0268	193	204	0	93.29	1.2e-05	K	DDENVNSQPFMR	W				9add7bb2-334b-4be0-a06a-12b9ae6262a5
1		gi|1050476	ribulose-1,5-bisphosphate carboxylase [Exostema caribaeum]	211	52559	7	6	5	5	177	1	0	0	1467.59	1466.59	1	1466.61	-0.0243	193	204	0	65.15	0.0069	K	DDENVNSQPFMR	W	Oxidation (M)	0.000000000010.0		8e07f201-6520-4ce6-8f0b-2a0050986e61
1		gi|1050476	ribulose-1,5-bisphosphate carboxylase [Exostema caribaeum]	211	52559	7	6	5	5	178	1	0	0	1467.62	1466.62	1	1466.61	0.006	193	204	0	48.28	0.043	K	DDENVNSQPFMR	W	Oxidation (M)	0.000000000010.0		ad1d5914-626a-4824-8118-2641481df83c
1		gi|1050476	ribulose-1,5-bisphosphate carboxylase [Exostema caribaeum]	211	52559	7	6	5	5	202	1	0	0	1546.77	1545.76	1	1545.73	0.0348	442	454	0	91.76	3e-05	K	WSPELAAACEVWK	E				94157d68-1ffb-41d7-be86-fa11548b3061
1		gi|1050476	ribulose-1,5-bisphosphate carboxylase [Exostema caribaeum]	211	52559	7	6	5	5	249	1	0	0	1810.88	1809.88	1	1809.8	0.0726	228	243	0	92.55	2.1e-05	K	GHYLNATAGTCEEMIK	R	Oxidation (M)	0.0000000000000100.0		cf4f86cf-da03-466e-86ba-b861b6db9e02
1		gi|392993839	ribulose 1,5-bisphosphate carboxylase, large subunit, partial (chloroplast) [Orixa japonica]	210	41016	8	7	6	6	70	1	0	0	1021.58	1020.58	1	1020.52	0.0536	11	19	0	77.84	0.00083	K	DTDILAAFR	V				84d29dc6-368b-4900-bd77-c856650145f7
1		gi|392993839	ribulose 1,5-bisphosphate carboxylase, large subunit, partial (chloroplast) [Orixa japonica]	210	41016	8	7	6	6	117	2	0	0	1261.75	1260.74	1	1260.71	0.0344	318	328	0	101.85	2.6e-06	R	DITLGFVDLLR	D				aa688366-6c2a-4175-bf1c-50be13a24142
1		gi|392993839	ribulose 1,5-bisphosphate carboxylase, large subunit, partial (chloroplast) [Orixa japonica]	210	41016	8	7	6	6	169	1	0	0	1451.6	1450.59	1	1450.61	-0.0268	180	191	0	93.29	1.2e-05	K	DDENVNSQPFMR	W				9add7bb2-334b-4be0-a06a-12b9ae6262a5
1		gi|392993839	ribulose 1,5-bisphosphate carboxylase, large subunit, partial (chloroplast) [Orixa japonica]	210	41016	8	7	6	6	177	1	0	0	1467.59	1466.59	1	1466.61	-0.0243	180	191	0	65.15	0.0069	K	DDENVNSQPFMR	W	Oxidation (M)	0.000000000010.0		8e07f201-6520-4ce6-8f0b-2a0050986e61
1		gi|392993839	ribulose 1,5-bisphosphate carboxylase, large subunit, partial (chloroplast) [Orixa japonica]	210	41016	8	7	6	6	178	1	0	0	1467.62	1466.62	1	1466.61	0.006	180	191	0	48.28	0.043	K	DDENVNSQPFMR	W	Oxidation (M)	0.000000000010.0		ad1d5914-626a-4824-8118-2641481df83c
1		gi|392993839	ribulose 1,5-bisphosphate carboxylase, large subunit, partial (chloroplast) [Orixa japonica]	210	41016	8	7	6	6	190	1	0	0	1497.7	1496.69	1	1496.7	-0.0151	298	312	0	71.08	0.0016	R	MSGGDHIHSGTVVGK	L	Oxidation (M)	0.100000000000000.0		3010fe4d-82cd-4323-934a-cbbcc31a34ee
1		gi|392993839	ribulose 1,5-bisphosphate carboxylase, large subunit, partial (chloroplast) [Orixa japonica]	210	41016	8	7	6	6	249	1	0	0	1810.88	1809.88	1	1809.8	0.0726	215	230	0	92.55	2.1e-05	K	GHYLNATAGTCEEMIK	R	Oxidation (M)	0.0000000000000100.0		cf4f86cf-da03-466e-86ba-b861b6db9e02
1		gi|392993839	ribulose 1,5-bisphosphate carboxylase, large subunit, partial (chloroplast) [Orixa japonica]	210	41016	8	7	6	6	339	1	0	1	2835.48	2834.47	1	2834.45	0.016	339	364	0	64.41	0.00018	R	GIYFTQDWVSLPGVLPVASGGIHVWH	-				edce7b3f-58bf-4e8d-b716-bd3446e2afd0
1		gi|209867545	ribulose-1,5-bisphosphate carboxylase/oxygenase large subunit [Cyclophyllum deplanchei]	210	48039	7	6	5	5	116	1	0	1	1261.66	1260.65	1	1260.62	0.0335	168	177	0	77.06	0.0011	R	FIFCAEALYK	A				208f2f60-1cbb-4e5b-ba4a-a0138d994a65
1		gi|209867545	ribulose-1,5-bisphosphate carboxylase/oxygenase large subunit [Cyclophyllum deplanchei]	210	48039	7	6	5	5	117	2	0	0	1261.75	1260.74	1	1260.71	0.0344	290	300	0	101.85	2.6e-06	R	DITLGFVDLLR	D				aa688366-6c2a-4175-bf1c-50be13a24142
1		gi|209867545	ribulose-1,5-bisphosphate carboxylase/oxygenase large subunit [Cyclophyllum deplanchei]	210	48039	7	6	5	5	169	1	0	0	1451.6	1450.59	1	1450.61	-0.0268	152	163	0	93.29	1.2e-05	K	DDENVNSQPFMR	W				9add7bb2-334b-4be0-a06a-12b9ae6262a5
1		gi|209867545	ribulose-1,5-bisphosphate carboxylase/oxygenase large subunit [Cyclophyllum deplanchei]	210	48039	7	6	5	5	177	1	0	0	1467.59	1466.59	1	1466.61	-0.0243	152	163	0	65.15	0.0069	K	DDENVNSQPFMR	W	Oxidation (M)	0.000000000010.0		8e07f201-6520-4ce6-8f0b-2a0050986e61
1		gi|209867545	ribulose-1,5-bisphosphate carboxylase/oxygenase large subunit [Cyclophyllum deplanchei]	210	48039	7	6	5	5	178	1	0	0	1467.62	1466.62	1	1466.61	0.006	152	163	0	48.28	0.043	K	DDENVNSQPFMR	W	Oxidation (M)	0.000000000010.0		ad1d5914-626a-4824-8118-2641481df83c
1		gi|209867545	ribulose-1,5-bisphosphate carboxylase/oxygenase large subunit [Cyclophyllum deplanchei]	210	48039	7	6	5	5	202	1	0	0	1546.77	1545.76	1	1545.73	0.0348	401	413	0	91.76	3e-05	K	WSPELAAACEVWK	E				94157d68-1ffb-41d7-be86-fa11548b3061
1		gi|209867545	ribulose-1,5-bisphosphate carboxylase/oxygenase large subunit [Cyclophyllum deplanchei]	210	48039	7	6	5	5	249	1	0	0	1810.88	1809.88	1	1809.8	0.0726	187	202	0	92.55	2.1e-05	K	GHYLNATAGTCEEMIK	R	Oxidation (M)	0.0000000000000100.0		cf4f86cf-da03-466e-86ba-b861b6db9e02
1		gi|108951220	ribulose-1,5-bisphosphate carboxylase/oxygenase large subunit [Sechium edule]	208	47032	7	6	5	5	116	5	0	0	1261.66	1260.65	1	1260.62	0.0335	165	174	0	75.01	0.0017	R	FLFCAEAIYK	S				208f2f60-1cbb-4e5b-ba4a-a0138d994a65
1		gi|108951220	ribulose-1,5-bisphosphate carboxylase/oxygenase large subunit [Sechium edule]	208	47032	7	6	5	5	117	2	0	0	1261.75	1260.74	1	1260.71	0.0344	287	297	0	101.85	2.6e-06	R	DITLGFVDLLR	D				aa688366-6c2a-4175-bf1c-50be13a24142
1		gi|108951220	ribulose-1,5-bisphosphate carboxylase/oxygenase large subunit [Sechium edule]	208	47032	7	6	5	5	169	1	0	0	1451.6	1450.59	1	1450.61	-0.0268	149	160	0	93.29	1.2e-05	K	DDENVNSQPFMR	W				9add7bb2-334b-4be0-a06a-12b9ae6262a5
1		gi|108951220	ribulose-1,5-bisphosphate carboxylase/oxygenase large subunit [Sechium edule]	208	47032	7	6	5	5	177	1	0	0	1467.59	1466.59	1	1466.61	-0.0243	149	160	0	65.15	0.0069	K	DDENVNSQPFMR	W	Oxidation (M)	0.000000000010.0		8e07f201-6520-4ce6-8f0b-2a0050986e61
1		gi|108951220	ribulose-1,5-bisphosphate carboxylase/oxygenase large subunit [Sechium edule]	208	47032	7	6	5	5	178	1	0	0	1467.62	1466.62	1	1466.61	0.006	149	160	0	48.28	0.043	K	DDENVNSQPFMR	W	Oxidation (M)	0.000000000010.0		ad1d5914-626a-4824-8118-2641481df83c
1		gi|108951220	ribulose-1,5-bisphosphate carboxylase/oxygenase large subunit [Sechium edule]	208	47032	7	6	5	5	202	1	0	0	1546.77	1545.76	1	1545.73	0.0348	398	410	0	91.76	3e-05	K	WSPELAAACEVWK	A				94157d68-1ffb-41d7-be86-fa11548b3061
1		gi|108951220	ribulose-1,5-bisphosphate carboxylase/oxygenase large subunit [Sechium edule]	208	47032	7	6	5	5	249	1	0	0	1810.88	1809.88	1	1809.8	0.0726	184	199	0	92.55	2.1e-05	K	GHYLNATAGTCEEMIK	R	Oxidation (M)	0.0000000000000100.0		cf4f86cf-da03-466e-86ba-b861b6db9e02
1		gi|11990278	ribulose-1,5-bisphosphate carboxylase/oxygenase large subunit [Oreopolus glacialis]	207	52227	7	6	5	5	117	2	0	0	1261.75	1260.74	1	1260.71	0.0344	331	341	0	101.85	2.6e-06	R	DITLGFVDLLR	D				aa688366-6c2a-4175-bf1c-50be13a24142
1		gi|11990278	ribulose-1,5-bisphosphate carboxylase/oxygenase large subunit [Oreopolus glacialis]	207	52227	7	6	5	5	169	1	0	0	1451.6	1450.59	1	1450.61	-0.0268	193	204	0	93.29	1.2e-05	K	DDENVNSQPFMR	W				9add7bb2-334b-4be0-a06a-12b9ae6262a5
1		gi|11990278	ribulose-1,5-bisphosphate carboxylase/oxygenase large subunit [Oreopolus glacialis]	207	52227	7	6	5	5	177	1	0	0	1467.59	1466.59	1	1466.61	-0.0243	193	204	0	65.15	0.0069	K	DDENVNSQPFMR	W	Oxidation (M)	0.000000000010.0		8e07f201-6520-4ce6-8f0b-2a0050986e61
1		gi|11990278	ribulose-1,5-bisphosphate carboxylase/oxygenase large subunit [Oreopolus glacialis]	207	52227	7	6	5	5	178	1	0	0	1467.62	1466.62	1	1466.61	0.006	193	204	0	48.28	0.043	K	DDENVNSQPFMR	W	Oxidation (M)	0.000000000010.0		ad1d5914-626a-4824-8118-2641481df83c
1		gi|11990278	ribulose-1,5-bisphosphate carboxylase/oxygenase large subunit [Oreopolus glacialis]	207	52227	7	6	5	5	190	1	0	0	1497.7	1496.69	1	1496.7	-0.0151	311	325	0	71.08	0.0016	R	MSGGDHIHSGTVVGK	L	Oxidation (M)	0.100000000000000.0		3010fe4d-82cd-4323-934a-cbbcc31a34ee
1		gi|11990278	ribulose-1,5-bisphosphate carboxylase/oxygenase large subunit [Oreopolus glacialis]	207	52227	7	6	5	5	202	1	0	0	1546.77	1545.76	1	1545.73	0.0348	442	454	0	91.76	3e-05	K	WSPELAAACEVWK	E				94157d68-1ffb-41d7-be86-fa11548b3061
1		gi|11990278	ribulose-1,5-bisphosphate carboxylase/oxygenase large subunit [Oreopolus glacialis]	207	52227	7	6	5	5	249	1	0	0	1810.88	1809.88	1	1809.8	0.0726	228	243	0	92.55	2.1e-05	K	GHYLNATAGTCEEMIK	R	Oxidation (M)	0.0000000000000100.0		cf4f86cf-da03-466e-86ba-b861b6db9e02
1		gi|7240372	cyclin [Nothofagus grandis]	206	50008	8	7	6	6	70	1	0	0	1021.58	1020.58	1	1020.52	0.0536	23	31	0	77.84	0.00083	K	DTDILAAFR	V				84d29dc6-368b-4900-bd77-c856650145f7
1		gi|7240372	cyclin [Nothofagus grandis]	206	50008	8	7	6	6	116	1	0	1	1261.66	1260.65	1	1260.62	0.0335	208	217	0	77.06	0.0011	R	FIFCAEAIYK	A				208f2f60-1cbb-4e5b-ba4a-a0138d994a65
1		gi|7240372	cyclin [Nothofagus grandis]	206	50008	8	7	6	6	117	2	0	0	1261.75	1260.74	1	1260.71	0.0344	330	340	0	101.85	2.6e-06	R	DITLGFVDLLR	D				aa688366-6c2a-4175-bf1c-50be13a24142
1		gi|7240372	cyclin [Nothofagus grandis]	206	50008	8	7	6	6	169	1	0	0	1451.6	1450.59	1	1450.61	-0.0268	192	203	0	93.29	1.2e-05	K	DDENVNSQPFMR	W				9add7bb2-334b-4be0-a06a-12b9ae6262a5
1		gi|7240372	cyclin [Nothofagus grandis]	206	50008	8	7	6	6	177	1	0	0	1467.59	1466.59	1	1466.61	-0.0243	192	203	0	65.15	0.0069	K	DDENVNSQPFMR	W	Oxidation (M)	0.000000000010.0		8e07f201-6520-4ce6-8f0b-2a0050986e61
1		gi|7240372	cyclin [Nothofagus grandis]	206	50008	8	7	6	6	178	1	0	0	1467.62	1466.62	1	1466.61	0.006	192	203	0	48.28	0.043	K	DDENVNSQPFMR	W	Oxidation (M)	0.000000000010.0		ad1d5914-626a-4824-8118-2641481df83c
1		gi|7240372	cyclin [Nothofagus grandis]	206	50008	8	7	6	6	190	1	0	0	1497.7	1496.69	1	1496.7	-0.0151	310	324	0	71.08	0.0016	R	MSGGDHIHSGTVVGK	L	Oxidation (M)	0.100000000000000.0		3010fe4d-82cd-4323-934a-cbbcc31a34ee
1		gi|7240372	cyclin [Nothofagus grandis]	206	50008	8	7	6	6	249	1	0	0	1810.88	1809.88	1	1809.8	0.0726	227	242	0	92.55	2.1e-05	K	GHYLNATAGTCEEMIK	R	Oxidation (M)	0.0000000000000100.0		cf4f86cf-da03-466e-86ba-b861b6db9e02
1		gi|1293020	ribulose-1,5-bisphosphate carboxylase/oxygenase large subunit, partial (chloroplast) [Polyscias guilfoylei]	205	52990	8	7	6	6	70	1	0	1	1021.58	1020.58	1	1020.52	0.0536	33	41	0	77.84	0.00083	K	DTDILAAFR	V				84d29dc6-368b-4900-bd77-c856650145f7
1		gi|1293020	ribulose-1,5-bisphosphate carboxylase/oxygenase large subunit, partial (chloroplast) [Polyscias guilfoylei]	205	52990	8	7	6	6	116	1	0	1	1261.66	1260.65	1	1260.62	0.0335	218	227	0	77.06	0.0011	R	FIFCAEALYK	A				208f2f60-1cbb-4e5b-ba4a-a0138d994a65
1		gi|1293020	ribulose-1,5-bisphosphate carboxylase/oxygenase large subunit, partial (chloroplast) [Polyscias guilfoylei]	205	52990	8	7	6	6	117	2	0	0	1261.75	1260.74	1	1260.71	0.0344	340	350	0	101.85	2.6e-06	R	DITLGFVDLLR	D				aa688366-6c2a-4175-bf1c-50be13a24142
1		gi|1293020	ribulose-1,5-bisphosphate carboxylase/oxygenase large subunit, partial (chloroplast) [Polyscias guilfoylei]	205	52990	8	7	6	6	169	1	0	0	1451.6	1450.59	1	1450.61	-0.0268	202	213	0	93.29	1.2e-05	K	DDENVNSQPFMR	W				9add7bb2-334b-4be0-a06a-12b9ae6262a5
1		gi|1293020	ribulose-1,5-bisphosphate carboxylase/oxygenase large subunit, partial (chloroplast) [Polyscias guilfoylei]	205	52990	8	7	6	6	177	1	0	0	1467.59	1466.59	1	1466.61	-0.0243	202	213	0	65.15	0.0069	K	DDENVNSQPFMR	W	Oxidation (M)	0.000000000010.0		8e07f201-6520-4ce6-8f0b-2a0050986e61
1		gi|1293020	ribulose-1,5-bisphosphate carboxylase/oxygenase large subunit, partial (chloroplast) [Polyscias guilfoylei]	205	52990	8	7	6	6	178	1	0	0	1467.62	1466.62	1	1466.61	0.006	202	213	0	48.28	0.043	K	DDENVNSQPFMR	W	Oxidation (M)	0.000000000010.0		ad1d5914-626a-4824-8118-2641481df83c
1		gi|1293020	ribulose-1,5-bisphosphate carboxylase/oxygenase large subunit, partial (chloroplast) [Polyscias guilfoylei]	205	52990	8	7	6	6	190	1	0	0	1497.7	1496.69	1	1496.7	-0.0151	320	334	0	71.08	0.0016	R	MSGGDHIHSGTVVGK	L	Oxidation (M)	0.100000000000000.0		3010fe4d-82cd-4323-934a-cbbcc31a34ee
1		gi|1293020	ribulose-1,5-bisphosphate carboxylase/oxygenase large subunit, partial (chloroplast) [Polyscias guilfoylei]	205	52990	8	7	6	6	202	1	0	0	1546.77	1545.76	1	1545.73	0.0348	451	463	0	91.76	3e-05	K	WSPELAAACEVWK	E				94157d68-1ffb-41d7-be86-fa11548b3061
1		gi|110288945	Ribulose bisphosphate carboxylase large chain precursor, putative, expressed [Oryza sativa Japonica Group]	205	40763	7	6	4	4	144	1	0	1	1315.73	1314.72	1	1314.7	0.0272	2	13	0	61.79	9.4e-05	M	FTSIVGNVFGFK	A				014fece4-4058-40a5-9ee9-4e58a2907960
1		gi|110288945	Ribulose bisphosphate carboxylase large chain precursor, putative, expressed [Oryza sativa Japonica Group]	205	40763	7	6	4	4	169	1	0	0	1451.6	1450.59	1	1450.61	-0.0268	87	98	0	93.29	1.2e-05	K	DDENVNSQPFMR	W				9add7bb2-334b-4be0-a06a-12b9ae6262a5
1		gi|110288945	Ribulose bisphosphate carboxylase large chain precursor, putative, expressed [Oryza sativa Japonica Group]	205	40763	7	6	4	4	174	1	0	1	1462.77	1461.76	1	1461.73	0.0269	1	13	0	94.78	1.6e-05	-	MFTSIVGNVFGFK	A	Oxidation (M)	0.1000000000000.0		fe897e45-530a-4e1b-8bcb-c3ca28fba215
1		gi|110288945	Ribulose bisphosphate carboxylase large chain precursor, putative, expressed [Oryza sativa Japonica Group]	205	40763	7	6	4	4	175	1	0	1	1462.77	1461.76	1	1461.73	0.0294	1	13	0	77.85	4.1e-05	-	MFTSIVGNVFGFK	A	Oxidation (M)	0.1000000000000.0		c4806180-14c9-4abe-8c44-16d22e727aff
1		gi|110288945	Ribulose bisphosphate carboxylase large chain precursor, putative, expressed [Oryza sativa Japonica Group]	205	40763	7	6	4	4	177	1	0	0	1467.59	1466.59	1	1466.61	-0.0243	87	98	0	65.15	0.0069	K	DDENVNSQPFMR	W	Oxidation (M)	0.000000000010.0		8e07f201-6520-4ce6-8f0b-2a0050986e61
1		gi|110288945	Ribulose bisphosphate carboxylase large chain precursor, putative, expressed [Oryza sativa Japonica Group]	205	40763	7	6	4	4	178	1	0	0	1467.62	1466.62	1	1466.61	0.006	87	98	0	48.28	0.043	K	DDENVNSQPFMR	W	Oxidation (M)	0.000000000010.0		ad1d5914-626a-4824-8118-2641481df83c
1		gi|110288945	Ribulose bisphosphate carboxylase large chain precursor, putative, expressed [Oryza sativa Japonica Group]	205	40763	7	6	4	4	249	1	0	0	1810.88	1809.88	1	1809.8	0.0726	122	137	0	92.55	2.1e-05	K	GHYLNATAGTCEEMIK	R	Oxidation (M)	0.0000000000000100.0		cf4f86cf-da03-466e-86ba-b861b6db9e02
1		gi|21634087	ribulose-1,5-bisphosphate carboxylase/oxygenase large subunit [Falkia repens]	204	52003	7	6	5	5	70	1	0	0	1021.58	1020.58	1	1020.52	0.0536	18	26	0	77.84	0.00083	K	DTDILAAFR	V				84d29dc6-368b-4900-bd77-c856650145f7
1		gi|21634087	ribulose-1,5-bisphosphate carboxylase/oxygenase large subunit [Falkia repens]	204	52003	7	6	5	5	115	1	0	1	1257.69	1256.69	1	1256.64	0.0503	421	431	0	95.97	1.4e-05	R	DLAQEGNEIIR	E				bcc600e8-1e0b-4157-b229-5a5a2d1d6899
1		gi|21634087	ribulose-1,5-bisphosphate carboxylase/oxygenase large subunit [Falkia repens]	204	52003	7	6	5	5	169	1	0	0	1451.6	1450.59	1	1450.61	-0.0268	187	198	0	93.29	1.2e-05	K	DDENVNSQPFMR	W				9add7bb2-334b-4be0-a06a-12b9ae6262a5
1		gi|21634087	ribulose-1,5-bisphosphate carboxylase/oxygenase large subunit [Falkia repens]	204	52003	7	6	5	5	177	1	0	0	1467.59	1466.59	1	1466.61	-0.0243	187	198	0	65.15	0.0069	K	DDENVNSQPFMR	W	Oxidation (M)	0.000000000010.0		8e07f201-6520-4ce6-8f0b-2a0050986e61
1		gi|21634087	ribulose-1,5-bisphosphate carboxylase/oxygenase large subunit [Falkia repens]	204	52003	7	6	5	5	178	1	0	0	1467.62	1466.62	1	1466.61	0.006	187	198	0	48.28	0.043	K	DDENVNSQPFMR	W	Oxidation (M)	0.000000000010.0		ad1d5914-626a-4824-8118-2641481df83c
1		gi|21634087	ribulose-1,5-bisphosphate carboxylase/oxygenase large subunit [Falkia repens]	204	52003	7	6	5	5	202	1	0	0	1546.77	1545.76	1	1545.73	0.0348	436	448	0	91.76	3e-05	K	WSPELAAACEVWK	E				94157d68-1ffb-41d7-be86-fa11548b3061
1		gi|21634087	ribulose-1,5-bisphosphate carboxylase/oxygenase large subunit [Falkia repens]	204	52003	7	6	5	5	249	1	0	0	1810.88	1809.88	1	1809.8	0.0726	222	237	0	92.55	2.1e-05	K	GHYLNATAGTCEEMIK	R	Oxidation (M)	0.0000000000000100.0		cf4f86cf-da03-466e-86ba-b861b6db9e02
1		gi|10945645	ribulose 1,5-bisphosphate carboxylase [Kaliphora madagascariensis]	204	53939	8	7	6	6	70	1	0	0	1021.58	1020.58	1	1020.52	0.0536	27	35	0	77.84	0.00083	K	DTDILAAFR	V				84d29dc6-368b-4900-bd77-c856650145f7
1		gi|10945645	ribulose 1,5-bisphosphate carboxylase [Kaliphora madagascariensis]	204	53939	8	7	6	6	116	5	0	0	1261.66	1260.65	1	1260.62	0.0335	212	221	0	75.01	0.0017	R	FLFCAEAIYK	A				208f2f60-1cbb-4e5b-ba4a-a0138d994a65
1		gi|10945645	ribulose 1,5-bisphosphate carboxylase [Kaliphora madagascariensis]	204	53939	8	7	6	6	117	2	0	0	1261.75	1260.74	1	1260.71	0.0344	334	344	0	101.85	2.6e-06	R	DITLGFVDLLR	D				aa688366-6c2a-4175-bf1c-50be13a24142
1		gi|10945645	ribulose 1,5-bisphosphate carboxylase [Kaliphora madagascariensis]	204	53939	8	7	6	6	169	1	0	0	1451.6	1450.59	1	1450.61	-0.0268	196	207	0	93.29	1.2e-05	K	DDENVNSQPFMR	W				9add7bb2-334b-4be0-a06a-12b9ae6262a5
1		gi|10945645	ribulose 1,5-bisphosphate carboxylase [Kaliphora madagascariensis]	204	53939	8	7	6	6	177	1	0	0	1467.59	1466.59	1	1466.61	-0.0243	196	207	0	65.15	0.0069	K	DDENVNSQPFMR	W	Oxidation (M)	0.000000000010.0		8e07f201-6520-4ce6-8f0b-2a0050986e61
1		gi|10945645	ribulose 1,5-bisphosphate carboxylase [Kaliphora madagascariensis]	204	53939	8	7	6	6	178	1	0	0	1467.62	1466.62	1	1466.61	0.006	196	207	0	48.28	0.043	K	DDENVNSQPFMR	W	Oxidation (M)	0.000000000010.0		ad1d5914-626a-4824-8118-2641481df83c
1		gi|10945645	ribulose 1,5-bisphosphate carboxylase [Kaliphora madagascariensis]	204	53939	8	7	6	6	190	1	0	1	1497.7	1496.69	1	1496.7	-0.0151	314	328	0	71.08	0.0016	R	MSGGDHIHSGTVVGK	L	Oxidation (M)	0.100000000000000.0		3010fe4d-82cd-4323-934a-cbbcc31a34ee
1		gi|10945645	ribulose 1,5-bisphosphate carboxylase [Kaliphora madagascariensis]	204	53939	8	7	6	6	249	1	0	0	1810.88	1809.88	1	1809.8	0.0726	231	246	0	92.55	2.1e-05	K	GHYLNATAGTCEEMIK	R	Oxidation (M)	0.0000000000000100.0		cf4f86cf-da03-466e-86ba-b861b6db9e02
1		gi|1050728	ribulose-1,5-bisphosphate carboxylase [Oldenlandia corymbosa]	203	52446	8	7	6	6	70	1	0	0	1021.58	1020.58	1	1020.52	0.0536	24	32	0	77.84	0.00083	K	DTDILAAFR	V				84d29dc6-368b-4900-bd77-c856650145f7
1		gi|1050728	ribulose-1,5-bisphosphate carboxylase [Oldenlandia corymbosa]	203	52446	8	7	6	6	116	5	0	0	1261.66	1260.65	1	1260.62	0.0335	209	218	0	75.01	0.0017	R	FLFCAEAIYK	S				208f2f60-1cbb-4e5b-ba4a-a0138d994a65
1		gi|1050728	ribulose-1,5-bisphosphate carboxylase [Oldenlandia corymbosa]	203	52446	8	7	6	6	117	2	0	0	1261.75	1260.74	1	1260.71	0.0344	331	341	0	101.85	2.6e-06	R	DITLGFVDLLR	D				aa688366-6c2a-4175-bf1c-50be13a24142
1		gi|1050728	ribulose-1,5-bisphosphate carboxylase [Oldenlandia corymbosa]	203	52446	8	7	6	6	169	1	0	0	1451.6	1450.59	1	1450.61	-0.0268	193	204	0	93.29	1.2e-05	K	DDENVNSQPFMR	W				9add7bb2-334b-4be0-a06a-12b9ae6262a5
1		gi|1050728	ribulose-1,5-bisphosphate carboxylase [Oldenlandia corymbosa]	203	52446	8	7	6	6	177	1	0	0	1467.59	1466.59	1	1466.61	-0.0243	193	204	0	65.15	0.0069	K	DDENVNSQPFMR	W	Oxidation (M)	0.000000000010.0		8e07f201-6520-4ce6-8f0b-2a0050986e61
1		gi|1050728	ribulose-1,5-bisphosphate carboxylase [Oldenlandia corymbosa]	203	52446	8	7	6	6	178	1	0	0	1467.62	1466.62	1	1466.61	0.006	193	204	0	48.28	0.043	K	DDENVNSQPFMR	W	Oxidation (M)	0.000000000010.0		ad1d5914-626a-4824-8118-2641481df83c
1		gi|1050728	ribulose-1,5-bisphosphate carboxylase [Oldenlandia corymbosa]	203	52446	8	7	6	6	190	1	0	0	1497.7	1496.69	1	1496.7	-0.0151	311	325	0	71.08	0.0016	R	MSGGDHIHSGTVVGK	L	Oxidation (M)	0.100000000000000.0		3010fe4d-82cd-4323-934a-cbbcc31a34ee
1		gi|1050728	ribulose-1,5-bisphosphate carboxylase [Oldenlandia corymbosa]	203	52446	8	7	6	6	202	1	0	0	1546.77	1545.76	1	1545.73	0.0348	442	454	0	91.76	3e-05	K	WSPELAAACEVWK	E				94157d68-1ffb-41d7-be86-fa11548b3061
1		gi|484483840	ribulose-1,5-bisphosphate carboxylase/oxygenase large subunit, partial (chloroplast) [Solanum nigrum]	201	52292	7	6	5	5	70	1	0	0	1021.58	1020.58	1	1020.52	0.0536	23	31	0	77.84	0.00083	K	DTDILAAFR	V				84d29dc6-368b-4900-bd77-c856650145f7
1		gi|484483840	ribulose-1,5-bisphosphate carboxylase/oxygenase large subunit, partial (chloroplast) [Solanum nigrum]	201	52292	7	6	5	5	117	2	0	0	1261.75	1260.74	1	1260.71	0.0344	330	340	0	101.85	2.6e-06	R	DITLGFVDLLR	D				aa688366-6c2a-4175-bf1c-50be13a24142
1		gi|484483840	ribulose-1,5-bisphosphate carboxylase/oxygenase large subunit, partial (chloroplast) [Solanum nigrum]	201	52292	7	6	5	5	169	1	0	0	1451.6	1450.59	1	1450.61	-0.0268	192	203	0	93.29	1.2e-05	K	DDENVNSQPFMR	W				9add7bb2-334b-4be0-a06a-12b9ae6262a5
1		gi|484483840	ribulose-1,5-bisphosphate carboxylase/oxygenase large subunit, partial (chloroplast) [Solanum nigrum]	201	52292	7	6	5	5	177	1	0	0	1467.59	1466.59	1	1466.61	-0.0243	192	203	0	65.15	0.0069	K	DDENVNSQPFMR	W	Oxidation (M)	0.000000000010.0		8e07f201-6520-4ce6-8f0b-2a0050986e61
1		gi|484483840	ribulose-1,5-bisphosphate carboxylase/oxygenase large subunit, partial (chloroplast) [Solanum nigrum]	201	52292	7	6	5	5	178	1	0	0	1467.62	1466.62	1	1466.61	0.006	192	203	0	48.28	0.043	K	DDENVNSQPFMR	W	Oxidation (M)	0.000000000010.0		ad1d5914-626a-4824-8118-2641481df83c
1		gi|484483840	ribulose-1,5-bisphosphate carboxylase/oxygenase large subunit, partial (chloroplast) [Solanum nigrum]	201	52292	7	6	5	5	190	1	0	0	1497.7	1496.69	1	1496.7	-0.0151	310	324	0	71.08	0.0016	R	MSGGDHIHSGTVVGK	L	Oxidation (M)	0.100000000000000.0		3010fe4d-82cd-4323-934a-cbbcc31a34ee
1		gi|484483840	ribulose-1,5-bisphosphate carboxylase/oxygenase large subunit, partial (chloroplast) [Solanum nigrum]	201	52292	7	6	5	5	212	1	0	1	1579.86	1578.85	1	1578.83	0.0246	454	467	0	101.07	3.3e-06	K	EIVFNFAAVDVLDK	-				9eea579f-21ef-4600-8d7c-d765cc21fcab
1		gi|392993841	ribulose 1,5-bisphosphate carboxylase, large subunit, partial (chloroplast) [Ptelea baldwinii]	199	41008	7	6	5	5	70	1	0	0	1021.58	1020.58	1	1020.52	0.0536	11	19	0	77.84	0.00083	K	DTDILAAFR	V				84d29dc6-368b-4900-bd77-c856650145f7
1		gi|392993841	ribulose 1,5-bisphosphate carboxylase, large subunit, partial (chloroplast) [Ptelea baldwinii]	199	41008	7	6	5	5	117	2	0	0	1261.75	1260.74	1	1260.71	0.0344	318	328	0	101.85	2.6e-06	R	DITLGFVDLLR	D				aa688366-6c2a-4175-bf1c-50be13a24142
1		gi|392993841	ribulose 1,5-bisphosphate carboxylase, large subunit, partial (chloroplast) [Ptelea baldwinii]	199	41008	7	6	5	5	169	1	0	0	1451.6	1450.59	1	1450.61	-0.0268	180	191	0	93.29	1.2e-05	K	DDENVNSQPFMR	W				9add7bb2-334b-4be0-a06a-12b9ae6262a5
1		gi|392993841	ribulose 1,5-bisphosphate carboxylase, large subunit, partial (chloroplast) [Ptelea baldwinii]	199	41008	7	6	5	5	177	1	0	0	1467.59	1466.59	1	1466.61	-0.0243	180	191	0	65.15	0.0069	K	DDENVNSQPFMR	W	Oxidation (M)	0.000000000010.0		8e07f201-6520-4ce6-8f0b-2a0050986e61
1		gi|392993841	ribulose 1,5-bisphosphate carboxylase, large subunit, partial (chloroplast) [Ptelea baldwinii]	199	41008	7	6	5	5	178	1	0	0	1467.62	1466.62	1	1466.61	0.006	180	191	0	48.28	0.043	K	DDENVNSQPFMR	W	Oxidation (M)	0.000000000010.0		ad1d5914-626a-4824-8118-2641481df83c
1		gi|392993841	ribulose 1,5-bisphosphate carboxylase, large subunit, partial (chloroplast) [Ptelea baldwinii]	199	41008	7	6	5	5	249	1	0	0	1810.88	1809.88	1	1809.8	0.0726	215	230	0	92.55	2.1e-05	K	GHYLNATAGTCEEMIK	R	Oxidation (M)	0.0000000000000100.0		cf4f86cf-da03-466e-86ba-b861b6db9e02
1		gi|392993841	ribulose 1,5-bisphosphate carboxylase, large subunit, partial (chloroplast) [Ptelea baldwinii]	199	41008	7	6	5	5	339	1	0	1	2835.48	2834.47	1	2834.45	0.016	339	364	0	64.41	0.00018	R	GIYFTQDWVSLPGVLPVASGGIHVWH	-				edce7b3f-58bf-4e8d-b716-bd3446e2afd0
1		gi|1694977	ribulose-biphosphate carboxylase large subunit [Blandfordia punicea]	197	52493	8	7	6	6	70	1	0	0	1021.58	1020.58	1	1020.52	0.0536	24	32	0	77.84	0.00083	K	DTDILAAFR	V				84d29dc6-368b-4900-bd77-c856650145f7
1		gi|1694977	ribulose-biphosphate carboxylase large subunit [Blandfordia punicea]	197	52493	8	7	6	6	115	1	0	1	1257.69	1256.69	1	1256.64	0.0503	427	437	0	95.97	1.4e-05	R	DLAQEGNEIIR	E				bcc600e8-1e0b-4157-b229-5a5a2d1d6899
1		gi|1694977	ribulose-biphosphate carboxylase large subunit [Blandfordia punicea]	197	52493	8	7	6	6	116	5	0	0	1261.66	1260.65	1	1260.62	0.0335	209	218	0	75.01	0.0017	R	FLFCAEAIYK	A				208f2f60-1cbb-4e5b-ba4a-a0138d994a65
1		gi|1694977	ribulose-biphosphate carboxylase large subunit [Blandfordia punicea]	197	52493	8	7	6	6	169	1	0	0	1451.6	1450.59	1	1450.61	-0.0268	193	204	0	93.29	1.2e-05	K	DDENVNSQPFMR	W				9add7bb2-334b-4be0-a06a-12b9ae6262a5
1		gi|1694977	ribulose-biphosphate carboxylase large subunit [Blandfordia punicea]	197	52493	8	7	6	6	177	1	0	0	1467.59	1466.59	1	1466.61	-0.0243	193	204	0	65.15	0.0069	K	DDENVNSQPFMR	W	Oxidation (M)	0.000000000010.0		8e07f201-6520-4ce6-8f0b-2a0050986e61
1		gi|1694977	ribulose-biphosphate carboxylase large subunit [Blandfordia punicea]	197	52493	8	7	6	6	178	1	0	0	1467.62	1466.62	1	1466.61	0.006	193	204	0	48.28	0.043	K	DDENVNSQPFMR	W	Oxidation (M)	0.000000000010.0		ad1d5914-626a-4824-8118-2641481df83c
1		gi|1694977	ribulose-biphosphate carboxylase large subunit [Blandfordia punicea]	197	52493	8	7	6	6	190	1	0	0	1497.7	1496.69	1	1496.7	-0.0151	311	325	0	71.08	0.0016	R	MSGGDHIHSGTVVGK	L	Oxidation (M)	0.100000000000000.0		3010fe4d-82cd-4323-934a-cbbcc31a34ee
1		gi|1694977	ribulose-biphosphate carboxylase large subunit [Blandfordia punicea]	197	52493	8	7	6	6	249	1	0	0	1810.88	1809.88	1	1809.8	0.0726	228	243	0	92.55	2.1e-05	K	GHYLNATAGTCEEMIK	R	Oxidation (M)	0.0000000000000100.0		cf4f86cf-da03-466e-86ba-b861b6db9e02
1		gi|108951054	ribulose-1,5-bisphosphate carboxylase/oxygenase large subunit [Momordica charantia]	197	46885	6	5	4	4	117	2	0	0	1261.75	1260.74	1	1260.71	0.0344	295	305	0	101.85	2.6e-06	R	DITLGFVDLLR	D				aa688366-6c2a-4175-bf1c-50be13a24142
1		gi|108951054	ribulose-1,5-bisphosphate carboxylase/oxygenase large subunit [Momordica charantia]	197	46885	6	5	4	4	169	1	0	0	1451.6	1450.59	1	1450.61	-0.0268	157	168	0	93.29	1.2e-05	K	DDENVNSQPFMR	W				9add7bb2-334b-4be0-a06a-12b9ae6262a5
1		gi|108951054	ribulose-1,5-bisphosphate carboxylase/oxygenase large subunit [Momordica charantia]	197	46885	6	5	4	4	177	1	0	0	1467.59	1466.59	1	1466.61	-0.0243	157	168	0	65.15	0.0069	K	DDENVNSQPFMR	W	Oxidation (M)	0.000000000010.0		8e07f201-6520-4ce6-8f0b-2a0050986e61
1		gi|108951054	ribulose-1,5-bisphosphate carboxylase/oxygenase large subunit [Momordica charantia]	197	46885	6	5	4	4	178	1	0	0	1467.62	1466.62	1	1466.61	0.006	157	168	0	48.28	0.043	K	DDENVNSQPFMR	W	Oxidation (M)	0.000000000010.0		ad1d5914-626a-4824-8118-2641481df83c
1		gi|108951054	ribulose-1,5-bisphosphate carboxylase/oxygenase large subunit [Momordica charantia]	197	46885	6	5	4	4	202	1	0	0	1546.77	1545.76	1	1545.73	0.0348	406	418	0	91.76	3e-05	K	WSPELAAACEVWK	E				94157d68-1ffb-41d7-be86-fa11548b3061
1		gi|108951054	ribulose-1,5-bisphosphate carboxylase/oxygenase large subunit [Momordica charantia]	197	46885	6	5	4	4	249	1	0	0	1810.88	1809.88	1	1809.8	0.0726	192	207	0	92.55	2.1e-05	K	GHYLNATAGTCEEMIK	R	Oxidation (M)	0.0000000000000100.0		cf4f86cf-da03-466e-86ba-b861b6db9e02
1		gi|16326287	ribulose 1,5-bisphosphate carboxylase/oxygenase large subunit [Quercus phillyraeoides]	196	51920	8	7	6	6	70	1	0	0	1021.58	1020.58	1	1020.52	0.0536	22	30	0	77.84	0.00083	K	DTDILAAFR	V				84d29dc6-368b-4900-bd77-c856650145f7
1		gi|16326287	ribulose 1,5-bisphosphate carboxylase/oxygenase large subunit [Quercus phillyraeoides]	196	51920	8	7	6	6	116	1	0	1	1261.66	1260.65	1	1260.62	0.0335	207	216	0	77.06	0.0011	R	FIFCAEAIYK	A				208f2f60-1cbb-4e5b-ba4a-a0138d994a65
1		gi|16326287	ribulose 1,5-bisphosphate carboxylase/oxygenase large subunit [Quercus phillyraeoides]	196	51920	8	7	6	6	169	1	0	0	1451.6	1450.59	1	1450.61	-0.0268	191	202	0	93.29	1.2e-05	K	DDENVNSQPFMR	W				9add7bb2-334b-4be0-a06a-12b9ae6262a5
1		gi|16326287	ribulose 1,5-bisphosphate carboxylase/oxygenase large subunit [Quercus phillyraeoides]	196	51920	8	7	6	6	177	1	0	0	1467.59	1466.59	1	1466.61	-0.0243	191	202	0	65.15	0.0069	K	DDENVNSQPFMR	W	Oxidation (M)	0.000000000010.0		8e07f201-6520-4ce6-8f0b-2a0050986e61
1		gi|16326287	ribulose 1,5-bisphosphate carboxylase/oxygenase large subunit [Quercus phillyraeoides]	196	51920	8	7	6	6	178	1	0	0	1467.62	1466.62	1	1466.61	0.006	191	202	0	48.28	0.043	K	DDENVNSQPFMR	W	Oxidation (M)	0.000000000010.0		ad1d5914-626a-4824-8118-2641481df83c
1		gi|16326287	ribulose 1,5-bisphosphate carboxylase/oxygenase large subunit [Quercus phillyraeoides]	196	51920	8	7	6	6	190	1	0	0	1497.7	1496.69	1	1496.7	-0.0151	309	323	0	71.08	0.0016	R	MSGGDHIHSGTVVGK	L	Oxidation (M)	0.100000000000000.0		3010fe4d-82cd-4323-934a-cbbcc31a34ee
1		gi|16326287	ribulose 1,5-bisphosphate carboxylase/oxygenase large subunit [Quercus phillyraeoides]	196	51920	8	7	6	6	202	1	0	0	1546.77	1545.76	1	1545.73	0.0348	440	452	0	91.76	3e-05	K	WSPELAAACEVWK	E				94157d68-1ffb-41d7-be86-fa11548b3061
1		gi|16326287	ribulose 1,5-bisphosphate carboxylase/oxygenase large subunit [Quercus phillyraeoides]	196	51920	8	7	6	6	249	1	0	0	1810.88	1809.88	1	1809.8	0.0726	226	241	0	92.55	2.1e-05	K	GHYLNATAGTCEEMIK	R	Oxidation (M)	0.0000000000000100.0		cf4f86cf-da03-466e-86ba-b861b6db9e02
1		gi|218854203	ribulose-1,5-bisphosphate carboxylase/oxygenase large subunit [Plumeria rubra]	195	48315	7	6	5	5	70	1	0	0	1021.58	1020.58	1	1020.52	0.0536	14	22	0	77.84	0.00083	K	DTDILAAFR	V				84d29dc6-368b-4900-bd77-c856650145f7
1		gi|218854203	ribulose-1,5-bisphosphate carboxylase/oxygenase large subunit [Plumeria rubra]	195	48315	7	6	5	5	116	1	0	1	1261.66	1260.65	1	1260.62	0.0335	199	208	0	77.06	0.0011	R	FIFCAEAIYK	A				208f2f60-1cbb-4e5b-ba4a-a0138d994a65
1		gi|218854203	ribulose-1,5-bisphosphate carboxylase/oxygenase large subunit [Plumeria rubra]	195	48315	7	6	5	5	117	2	0	0	1261.75	1260.74	1	1260.71	0.0344	321	331	0	101.85	2.6e-06	R	DITLGFVDLLR	D				aa688366-6c2a-4175-bf1c-50be13a24142
1		gi|218854203	ribulose-1,5-bisphosphate carboxylase/oxygenase large subunit [Plumeria rubra]	195	48315	7	6	5	5	169	1	0	0	1451.6	1450.59	1	1450.61	-0.0268	183	194	0	93.29	1.2e-05	K	DDENVNSQPFMR	W				9add7bb2-334b-4be0-a06a-12b9ae6262a5
1		gi|218854203	ribulose-1,5-bisphosphate carboxylase/oxygenase large subunit [Plumeria rubra]	195	48315	7	6	5	5	177	1	0	0	1467.59	1466.59	1	1466.61	-0.0243	183	194	0	65.15	0.0069	K	DDENVNSQPFMR	W	Oxidation (M)	0.000000000010.0		8e07f201-6520-4ce6-8f0b-2a0050986e61
1		gi|218854203	ribulose-1,5-bisphosphate carboxylase/oxygenase large subunit [Plumeria rubra]	195	48315	7	6	5	5	178	1	0	0	1467.62	1466.62	1	1466.61	0.006	183	194	0	48.28	0.043	K	DDENVNSQPFMR	W	Oxidation (M)	0.000000000010.0		ad1d5914-626a-4824-8118-2641481df83c
1		gi|218854203	ribulose-1,5-bisphosphate carboxylase/oxygenase large subunit [Plumeria rubra]	195	48315	7	6	5	5	249	1	0	0	1810.88	1809.88	1	1809.8	0.0726	218	233	0	92.55	2.1e-05	K	GHYLNATAGTCEEMIK	R	Oxidation (M)	0.0000000000000100.0		cf4f86cf-da03-466e-86ba-b861b6db9e02
1		gi|112408784	ribulose-1,5-bisphosphate carboxylase/oxygenase large subunit [Pentarhopalopilia marquesii]	194	52225	7	6	5	5	70	1	0	0	1021.58	1020.58	1	1020.52	0.0536	26	34	0	77.84	0.00083	K	DTDILAAFR	V				84d29dc6-368b-4900-bd77-c856650145f7
1		gi|112408784	ribulose-1,5-bisphosphate carboxylase/oxygenase large subunit [Pentarhopalopilia marquesii]	194	52225	7	6	5	5	116	1	0	1	1261.66	1260.65	1	1260.62	0.0335	211	220	0	77.06	0.0011	R	FIFCAEAIYK	A				208f2f60-1cbb-4e5b-ba4a-a0138d994a65
1		gi|112408784	ribulose-1,5-bisphosphate carboxylase/oxygenase large subunit [Pentarhopalopilia marquesii]	194	52225	7	6	5	5	117	2	0	0	1261.75	1260.74	1	1260.71	0.0344	333	343	0	101.85	2.6e-06	R	DITLGFVDLLR	D				aa688366-6c2a-4175-bf1c-50be13a24142
1		gi|112408784	ribulose-1,5-bisphosphate carboxylase/oxygenase large subunit [Pentarhopalopilia marquesii]	194	52225	7	6	5	5	169	1	0	0	1451.6	1450.59	1	1450.61	-0.0268	195	206	0	93.29	1.2e-05	K	DDENVNSQPFMR	W				9add7bb2-334b-4be0-a06a-12b9ae6262a5
1		gi|112408784	ribulose-1,5-bisphosphate carboxylase/oxygenase large subunit [Pentarhopalopilia marquesii]	194	52225	7	6	5	5	177	1	0	0	1467.59	1466.59	1	1466.61	-0.0243	195	206	0	65.15	0.0069	K	DDENVNSQPFMR	W	Oxidation (M)	0.000000000010.0		8e07f201-6520-4ce6-8f0b-2a0050986e61
1		gi|112408784	ribulose-1,5-bisphosphate carboxylase/oxygenase large subunit [Pentarhopalopilia marquesii]	194	52225	7	6	5	5	178	1	0	0	1467.62	1466.62	1	1466.61	0.006	195	206	0	48.28	0.043	K	DDENVNSQPFMR	W	Oxidation (M)	0.000000000010.0		ad1d5914-626a-4824-8118-2641481df83c
1		gi|112408784	ribulose-1,5-bisphosphate carboxylase/oxygenase large subunit [Pentarhopalopilia marquesii]	194	52225	7	6	5	5	202	1	0	0	1546.77	1545.76	1	1545.73	0.0348	444	456	0	91.76	3e-05	K	WSPELAAACEVWK	E				94157d68-1ffb-41d7-be86-fa11548b3061
1		gi|10764583	ribulose-1,5-biphosphate carboxylase/oxygenase large subunit [Vesselowskya rubifolia]	194	51454	10	7	7	6	70	1	0	0	1021.58	1020.58	1	1020.52	0.0536	18	26	0	77.84	0.00083	K	DTDILAAFR	V				84d29dc6-368b-4900-bd77-c856650145f7
1		gi|10764583	ribulose-1,5-biphosphate carboxylase/oxygenase large subunit [Vesselowskya rubifolia]	194	51454	10	7	7	6	71	1	0	1	1023.46	1022.45	1	1022.47	-0.0173	336	343	1	50.68	0.092	R	DDFVEKDR	S				bffdb68b-84c5-40f5-a550-eb469cc6c48d
1		gi|10764583	ribulose-1,5-biphosphate carboxylase/oxygenase large subunit [Vesselowskya rubifolia]	194	51454	10	7	7	6	72	1	0	1	1023.46	1022.45	1	1022.47	-0.0157	336	343	1	48.87	0.091	R	DDFVEKDR	S				5f44fb3d-87a9-437e-8b6e-907154a5b7b8
1		gi|10764583	ribulose-1,5-biphosphate carboxylase/oxygenase large subunit [Vesselowskya rubifolia]	194	51454	10	7	7	6	116	5	0	0	1261.66	1260.65	1	1260.62	0.0335	203	212	0	75.01	0.0017	R	FLFCAEAIYK	A				208f2f60-1cbb-4e5b-ba4a-a0138d994a65
1		gi|10764583	ribulose-1,5-biphosphate carboxylase/oxygenase large subunit [Vesselowskya rubifolia]	194	51454	10	7	7	6	169	1	0	0	1451.6	1450.59	1	1450.61	-0.0268	187	198	0	93.29	1.2e-05	K	DDENVNSQPFMR	W				9add7bb2-334b-4be0-a06a-12b9ae6262a5
1		gi|10764583	ribulose-1,5-biphosphate carboxylase/oxygenase large subunit [Vesselowskya rubifolia]	194	51454	10	7	7	6	177	1	0	0	1467.59	1466.59	1	1466.61	-0.0243	187	198	0	65.15	0.0069	K	DDENVNSQPFMR	W	Oxidation (M)	0.000000000010.0		8e07f201-6520-4ce6-8f0b-2a0050986e61
1		gi|10764583	ribulose-1,5-biphosphate carboxylase/oxygenase large subunit [Vesselowskya rubifolia]	194	51454	10	7	7	6	178	1	0	0	1467.62	1466.62	1	1466.61	0.006	187	198	0	48.28	0.043	K	DDENVNSQPFMR	W	Oxidation (M)	0.000000000010.0		ad1d5914-626a-4824-8118-2641481df83c
1		gi|10764583	ribulose-1,5-biphosphate carboxylase/oxygenase large subunit [Vesselowskya rubifolia]	194	51454	10	7	7	6	190	1	0	0	1497.7	1496.69	1	1496.7	-0.0151	305	319	0	71.08	0.0016	R	MSGGDHIHSGTVVGK	L	Oxidation (M)	0.100000000000000.0		3010fe4d-82cd-4323-934a-cbbcc31a34ee
1		gi|10764583	ribulose-1,5-biphosphate carboxylase/oxygenase large subunit [Vesselowskya rubifolia]	194	51454	10	7	7	6	202	1	0	0	1546.77	1545.76	1	1545.73	0.0348	436	448	0	91.76	3e-05	K	WSPELAAACEVWK	E				94157d68-1ffb-41d7-be86-fa11548b3061
1		gi|10764583	ribulose-1,5-biphosphate carboxylase/oxygenase large subunit [Vesselowskya rubifolia]	194	51454	10	7	7	6	249	1	0	0	1810.88	1809.88	1	1809.8	0.0726	222	237	0	92.55	2.1e-05	K	GHYLNATAGTCEEMIK	R	Oxidation (M)	0.0000000000000100.0		cf4f86cf-da03-466e-86ba-b861b6db9e02
1		gi|10441435	ribulose-1,5-bisphosphate carboxylase/oxygenase large subunit, partial (chloroplast) [Elytraria crenata]	193	52117	9	6	6	5	70	1	0	0	1021.58	1020.58	1	1020.52	0.0536	21	29	0	77.84	0.00083	K	DTDILAAFR	V				84d29dc6-368b-4900-bd77-c856650145f7
1		gi|10441435	ribulose-1,5-bisphosphate carboxylase/oxygenase large subunit, partial (chloroplast) [Elytraria crenata]	193	52117	9	6	6	5	71	1	0	1	1023.46	1022.45	1	1022.47	-0.0173	339	346	1	50.68	0.092	R	DDFVEKDR	S				bffdb68b-84c5-40f5-a550-eb469cc6c48d
1		gi|10441435	ribulose-1,5-bisphosphate carboxylase/oxygenase large subunit, partial (chloroplast) [Elytraria crenata]	193	52117	9	6	6	5	72	1	0	1	1023.46	1022.45	1	1022.47	-0.0157	339	346	1	48.87	0.091	R	DDFVEKDR	S				5f44fb3d-87a9-437e-8b6e-907154a5b7b8
1		gi|10441435	ribulose-1,5-bisphosphate carboxylase/oxygenase large subunit, partial (chloroplast) [Elytraria crenata]	193	52117	9	6	6	5	116	5	0	0	1261.66	1260.65	1	1260.62	0.0335	206	215	0	75.01	0.0017	R	FLFCAEAIYK	S				208f2f60-1cbb-4e5b-ba4a-a0138d994a65
1		gi|10441435	ribulose-1,5-bisphosphate carboxylase/oxygenase large subunit, partial (chloroplast) [Elytraria crenata]	193	52117	9	6	6	5	117	2	0	0	1261.75	1260.74	1	1260.71	0.0344	328	338	0	101.85	2.6e-06	R	DITLGFVDLLR	D				aa688366-6c2a-4175-bf1c-50be13a24142
1		gi|10441435	ribulose-1,5-bisphosphate carboxylase/oxygenase large subunit, partial (chloroplast) [Elytraria crenata]	193	52117	9	6	6	5	169	1	0	0	1451.6	1450.59	1	1450.61	-0.0268	190	201	0	93.29	1.2e-05	K	DDENVNSQPFMR	W				9add7bb2-334b-4be0-a06a-12b9ae6262a5
1		gi|10441435	ribulose-1,5-bisphosphate carboxylase/oxygenase large subunit, partial (chloroplast) [Elytraria crenata]	193	52117	9	6	6	5	177	1	0	0	1467.59	1466.59	1	1466.61	-0.0243	190	201	0	65.15	0.0069	K	DDENVNSQPFMR	W	Oxidation (M)	0.000000000010.0		8e07f201-6520-4ce6-8f0b-2a0050986e61
1		gi|10441435	ribulose-1,5-bisphosphate carboxylase/oxygenase large subunit, partial (chloroplast) [Elytraria crenata]	193	52117	9	6	6	5	178	1	0	0	1467.62	1466.62	1	1466.61	0.006	190	201	0	48.28	0.043	K	DDENVNSQPFMR	W	Oxidation (M)	0.000000000010.0		ad1d5914-626a-4824-8118-2641481df83c
1		gi|10441435	ribulose-1,5-bisphosphate carboxylase/oxygenase large subunit, partial (chloroplast) [Elytraria crenata]	193	52117	9	6	6	5	249	1	0	0	1810.88	1809.88	1	1809.8	0.0726	225	240	0	92.55	2.1e-05	K	GHYLNATAGTCEEMIK	R	Oxidation (M)	0.0000000000000100.0		cf4f86cf-da03-466e-86ba-b861b6db9e02
1		gi|112408794	ribulose-1,5-bisphosphate carboxylase/oxygenase large subunit [Moquiniella rubra]	193	52921	7	6	5	5	70	1	0	0	1021.58	1020.58	1	1020.52	0.0536	31	39	0	77.84	0.00083	K	DTDILAAFR	V				84d29dc6-368b-4900-bd77-c856650145f7
1		gi|112408794	ribulose-1,5-bisphosphate carboxylase/oxygenase large subunit [Moquiniella rubra]	193	52921	7	6	5	5	117	2	0	0	1261.75	1260.74	1	1260.71	0.0344	338	348	0	101.85	2.6e-06	R	DITLGFVDLLR	D				aa688366-6c2a-4175-bf1c-50be13a24142
1		gi|112408794	ribulose-1,5-bisphosphate carboxylase/oxygenase large subunit [Moquiniella rubra]	193	52921	7	6	5	5	169	1	0	0	1451.6	1450.59	1	1450.61	-0.0268	200	211	0	93.29	1.2e-05	K	DDENVNSQPFMR	W				9add7bb2-334b-4be0-a06a-12b9ae6262a5
1		gi|112408794	ribulose-1,5-bisphosphate carboxylase/oxygenase large subunit [Moquiniella rubra]	193	52921	7	6	5	5	177	1	0	0	1467.59	1466.59	1	1466.61	-0.0243	200	211	0	65.15	0.0069	K	DDENVNSQPFMR	W	Oxidation (M)	0.000000000010.0		8e07f201-6520-4ce6-8f0b-2a0050986e61
1		gi|112408794	ribulose-1,5-bisphosphate carboxylase/oxygenase large subunit [Moquiniella rubra]	193	52921	7	6	5	5	178	1	0	0	1467.62	1466.62	1	1466.61	0.006	200	211	0	48.28	0.043	K	DDENVNSQPFMR	W	Oxidation (M)	0.000000000010.0		ad1d5914-626a-4824-8118-2641481df83c
1		gi|112408794	ribulose-1,5-bisphosphate carboxylase/oxygenase large subunit [Moquiniella rubra]	193	52921	7	6	5	5	190	1	0	0	1497.7	1496.69	1	1496.7	-0.0151	318	332	0	71.08	0.0016	R	MSGGDHIHSGTVVGK	L	Oxidation (M)	0.100000000000000.0		3010fe4d-82cd-4323-934a-cbbcc31a34ee
1		gi|112408794	ribulose-1,5-bisphosphate carboxylase/oxygenase large subunit [Moquiniella rubra]	193	52921	7	6	5	5	249	1	0	0	1810.88	1809.88	1	1809.8	0.0726	235	250	0	92.55	2.1e-05	K	GHYLNATAGTCEEMIK	R	Oxidation (M)	0.0000000000000100.0		cf4f86cf-da03-466e-86ba-b861b6db9e02
1		gi|108950998	ribulose-1,5-bisphosphate carboxylase/oxygenase large subunit [Xerosicyos tripartitus]	192	50813	10	7	7	6	70	1	0	0	1021.58	1020.58	1	1020.52	0.0536	12	20	0	77.84	0.00083	K	DTDILAAFR	V				84d29dc6-368b-4900-bd77-c856650145f7
1		gi|108950998	ribulose-1,5-bisphosphate carboxylase/oxygenase large subunit [Xerosicyos tripartitus]	192	50813	10	7	7	6	71	1	0	1	1023.46	1022.45	1	1022.47	-0.0173	330	337	1	50.68	0.092	R	DDFVEKDR	S				bffdb68b-84c5-40f5-a550-eb469cc6c48d
1		gi|108950998	ribulose-1,5-bisphosphate carboxylase/oxygenase large subunit [Xerosicyos tripartitus]	192	50813	10	7	7	6	72	1	0	1	1023.46	1022.45	1	1022.47	-0.0157	330	337	1	48.87	0.091	R	DDFVEKDR	S				5f44fb3d-87a9-437e-8b6e-907154a5b7b8
1		gi|108950998	ribulose-1,5-bisphosphate carboxylase/oxygenase large subunit [Xerosicyos tripartitus]	192	50813	10	7	7	6	115	7	0	1	1257.69	1256.69	1	1256.68	0.0027	415	425	1	73.09	0.0027	R	DLARTGNEIIR	E				bcc600e8-1e0b-4157-b229-5a5a2d1d6899
1		gi|108950998	ribulose-1,5-bisphosphate carboxylase/oxygenase large subunit [Xerosicyos tripartitus]	192	50813	10	7	7	6	116	5	0	0	1261.66	1260.65	1	1260.62	0.0335	197	206	0	75.01	0.0017	R	FLFCAEAIYK	S				208f2f60-1cbb-4e5b-ba4a-a0138d994a65
1		gi|108950998	ribulose-1,5-bisphosphate carboxylase/oxygenase large subunit [Xerosicyos tripartitus]	192	50813	10	7	7	6	169	1	0	0	1451.6	1450.59	1	1450.61	-0.0268	181	192	0	93.29	1.2e-05	K	DDENVNSQPFMR	W				9add7bb2-334b-4be0-a06a-12b9ae6262a5
1		gi|108950998	ribulose-1,5-bisphosphate carboxylase/oxygenase large subunit [Xerosicyos tripartitus]	192	50813	10	7	7	6	177	1	0	0	1467.59	1466.59	1	1466.61	-0.0243	181	192	0	65.15	0.0069	K	DDENVNSQPFMR	W	Oxidation (M)	0.000000000010.0		8e07f201-6520-4ce6-8f0b-2a0050986e61
1		gi|108950998	ribulose-1,5-bisphosphate carboxylase/oxygenase large subunit [Xerosicyos tripartitus]	192	50813	10	7	7	6	178	1	0	0	1467.62	1466.62	1	1466.61	0.006	181	192	0	48.28	0.043	K	DDENVNSQPFMR	W	Oxidation (M)	0.000000000010.0		ad1d5914-626a-4824-8118-2641481df83c
1		gi|108950998	ribulose-1,5-bisphosphate carboxylase/oxygenase large subunit [Xerosicyos tripartitus]	192	50813	10	7	7	6	202	1	0	0	1546.77	1545.76	1	1545.73	0.0348	430	442	0	91.76	3e-05	K	WSPELAAACEVWK	E				94157d68-1ffb-41d7-be86-fa11548b3061
1		gi|108950998	ribulose-1,5-bisphosphate carboxylase/oxygenase large subunit [Xerosicyos tripartitus]	192	50813	10	7	7	6	249	1	0	0	1810.88	1809.88	1	1809.8	0.0726	216	231	0	92.55	2.1e-05	K	GHYLNATAGTCEEMIK	R	Oxidation (M)	0.0000000000000100.0		cf4f86cf-da03-466e-86ba-b861b6db9e02
1		gi|1050544	ribulose-1,5-bisphosphate carboxylase [Mussaenda erythrophylla]	192	52240	9	6	6	5	70	1	0	0	1021.58	1020.58	1	1020.52	0.0536	24	32	0	77.84	0.00083	K	DTDILAAFR	V				84d29dc6-368b-4900-bd77-c856650145f7
1		gi|1050544	ribulose-1,5-bisphosphate carboxylase [Mussaenda erythrophylla]	192	52240	9	6	6	5	71	1	0	1	1023.46	1022.45	1	1022.47	-0.0173	342	349	1	50.68	0.092	R	DDFVEKDR	S				bffdb68b-84c5-40f5-a550-eb469cc6c48d
1		gi|1050544	ribulose-1,5-bisphosphate carboxylase [Mussaenda erythrophylla]	192	52240	9	6	6	5	72	1	0	1	1023.46	1022.45	1	1022.47	-0.0157	342	349	1	48.87	0.091	R	DDFVEKDR	S				5f44fb3d-87a9-437e-8b6e-907154a5b7b8
1		gi|1050544	ribulose-1,5-bisphosphate carboxylase [Mussaenda erythrophylla]	192	52240	9	6	6	5	116	5	0	0	1261.66	1260.65	1	1260.62	0.0335	209	218	0	75.01	0.0017	R	FLFCAEAIYK	S				208f2f60-1cbb-4e5b-ba4a-a0138d994a65
1		gi|1050544	ribulose-1,5-bisphosphate carboxylase [Mussaenda erythrophylla]	192	52240	9	6	6	5	117	2	0	0	1261.75	1260.74	1	1260.71	0.0344	331	341	0	101.85	2.6e-06	R	DITLGFVDLLR	D				aa688366-6c2a-4175-bf1c-50be13a24142
1		gi|1050544	ribulose-1,5-bisphosphate carboxylase [Mussaenda erythrophylla]	192	52240	9	6	6	5	169	1	0	0	1451.6	1450.59	1	1450.61	-0.0268	193	204	0	93.29	1.2e-05	K	DDENVNSQPFMR	W				9add7bb2-334b-4be0-a06a-12b9ae6262a5
1		gi|1050544	ribulose-1,5-bisphosphate carboxylase [Mussaenda erythrophylla]	192	52240	9	6	6	5	177	1	0	0	1467.59	1466.59	1	1466.61	-0.0243	193	204	0	65.15	0.0069	K	DDENVNSQPFMR	W	Oxidation (M)	0.000000000010.0		8e07f201-6520-4ce6-8f0b-2a0050986e61
1		gi|1050544	ribulose-1,5-bisphosphate carboxylase [Mussaenda erythrophylla]	192	52240	9	6	6	5	178	1	0	0	1467.62	1466.62	1	1466.61	0.006	193	204	0	48.28	0.043	K	DDENVNSQPFMR	W	Oxidation (M)	0.000000000010.0		ad1d5914-626a-4824-8118-2641481df83c
1		gi|1050544	ribulose-1,5-bisphosphate carboxylase [Mussaenda erythrophylla]	192	52240	9	6	6	5	202	1	0	0	1546.77	1545.76	1	1545.73	0.0348	442	454	0	91.76	3e-05	K	WSPELAAACEVWK	E				94157d68-1ffb-41d7-be86-fa11548b3061
1		gi|297167054	ribulose-1,5-bisphosphate carboxylase/oxygenase large subunit [Pimelea sp. ~Pipinui~]	192	51339	7	6	5	5	70	1	0	0	1021.58	1020.58	1	1020.52	0.0536	15	23	0	77.84	0.00083	K	DTDILAAFR	V				84d29dc6-368b-4900-bd77-c856650145f7
1		gi|297167054	ribulose-1,5-bisphosphate carboxylase/oxygenase large subunit [Pimelea sp. ~Pipinui~]	192	51339	7	6	5	5	117	1	0	1	1261.75	1260.74	1	1260.71	0.0344	322	332	0	102.38	2.3e-06	R	DITIGFVDLLR	D				aa688366-6c2a-4175-bf1c-50be13a24142
1		gi|297167054	ribulose-1,5-bisphosphate carboxylase/oxygenase large subunit [Pimelea sp. ~Pipinui~]	192	51339	7	6	5	5	169	1	0	0	1451.6	1450.59	1	1450.61	-0.0268	184	195	0	93.29	1.2e-05	K	DDENVNSQPFMR	W				9add7bb2-334b-4be0-a06a-12b9ae6262a5
1		gi|297167054	ribulose-1,5-bisphosphate carboxylase/oxygenase large subunit [Pimelea sp. ~Pipinui~]	192	51339	7	6	5	5	177	1	0	0	1467.59	1466.59	1	1466.61	-0.0243	184	195	0	65.15	0.0069	K	DDENVNSQPFMR	W	Oxidation (M)	0.000000000010.0		8e07f201-6520-4ce6-8f0b-2a0050986e61
1		gi|297167054	ribulose-1,5-bisphosphate carboxylase/oxygenase large subunit [Pimelea sp. ~Pipinui~]	192	51339	7	6	5	5	178	1	0	0	1467.62	1466.62	1	1466.61	0.006	184	195	0	48.28	0.043	K	DDENVNSQPFMR	W	Oxidation (M)	0.000000000010.0		ad1d5914-626a-4824-8118-2641481df83c
1		gi|297167054	ribulose-1,5-bisphosphate carboxylase/oxygenase large subunit [Pimelea sp. ~Pipinui~]	192	51339	7	6	5	5	190	1	0	0	1497.7	1496.69	1	1496.7	-0.0151	302	316	0	71.08	0.0016	R	MSGGDHIHSGTVVGK	L	Oxidation (M)	0.100000000000000.0		3010fe4d-82cd-4323-934a-cbbcc31a34ee
1		gi|297167054	ribulose-1,5-bisphosphate carboxylase/oxygenase large subunit [Pimelea sp. ~Pipinui~]	192	51339	7	6	5	5	202	1	0	0	1546.77	1545.76	1	1545.73	0.0348	433	445	0	91.76	3e-05	K	WSPELAAACEVWK	E				94157d68-1ffb-41d7-be86-fa11548b3061
1		gi|10048142	ribulose 1,5-bisphosphate carboxylase [Kirkia wilmsii]	192	52517	7	6	5	5	70	1	0	0	1021.58	1020.58	1	1020.52	0.0536	27	35	0	77.84	0.00083	K	DTDILAAFR	V				84d29dc6-368b-4900-bd77-c856650145f7
1		gi|10048142	ribulose 1,5-bisphosphate carboxylase [Kirkia wilmsii]	192	52517	7	6	5	5	117	2	0	0	1261.75	1260.74	1	1260.71	0.0344	334	344	0	101.85	2.6e-06	R	DITLGFVDLLR	D				aa688366-6c2a-4175-bf1c-50be13a24142
1		gi|10048142	ribulose 1,5-bisphosphate carboxylase [Kirkia wilmsii]	192	52517	7	6	5	5	169	1	0	0	1451.6	1450.59	1	1450.61	-0.0268	196	207	0	93.29	1.2e-05	K	DDENVNSQPFMR	W				9add7bb2-334b-4be0-a06a-12b9ae6262a5
1		gi|10048142	ribulose 1,5-bisphosphate carboxylase [Kirkia wilmsii]	192	52517	7	6	5	5	177	1	0	0	1467.59	1466.59	1	1466.61	-0.0243	196	207	0	65.15	0.0069	K	DDENVNSQPFMR	W	Oxidation (M)	0.000000000010.0		8e07f201-6520-4ce6-8f0b-2a0050986e61
1		gi|10048142	ribulose 1,5-bisphosphate carboxylase [Kirkia wilmsii]	192	52517	7	6	5	5	178	1	0	0	1467.62	1466.62	1	1466.61	0.006	196	207	0	48.28	0.043	K	DDENVNSQPFMR	W	Oxidation (M)	0.000000000010.0		ad1d5914-626a-4824-8118-2641481df83c
1		gi|10048142	ribulose 1,5-bisphosphate carboxylase [Kirkia wilmsii]	192	52517	7	6	5	5	190	1	0	0	1497.7	1496.69	1	1496.7	-0.0151	314	328	0	71.08	0.0016	R	MSGGDHIHSGTVVGK	L	Oxidation (M)	0.100000000000000.0		3010fe4d-82cd-4323-934a-cbbcc31a34ee
1		gi|10048142	ribulose 1,5-bisphosphate carboxylase [Kirkia wilmsii]	192	52517	7	6	5	5	202	1	0	0	1546.77	1545.76	1	1545.73	0.0348	445	457	0	91.76	3e-05	K	WSPELAAACEVWK	E				94157d68-1ffb-41d7-be86-fa11548b3061
1		gi|401787145	ribulose-1,5-bisphosphate carboxylase/oxygenase large subunit, partial (chloroplast) [Vasconcellea cauliflora]	190	50273	9	6	6	5	70	1	0	0	1021.58	1020.58	1	1020.52	0.0536	19	27	0	77.84	0.00083	K	DTDILAAFR	V				84d29dc6-368b-4900-bd77-c856650145f7
1		gi|401787145	ribulose-1,5-bisphosphate carboxylase/oxygenase large subunit, partial (chloroplast) [Vasconcellea cauliflora]	190	50273	9	6	6	5	71	1	0	1	1023.46	1022.45	1	1022.47	-0.0173	337	344	1	50.68	0.092	R	DDFVEKDR	S				bffdb68b-84c5-40f5-a550-eb469cc6c48d
1		gi|401787145	ribulose-1,5-bisphosphate carboxylase/oxygenase large subunit, partial (chloroplast) [Vasconcellea cauliflora]	190	50273	9	6	6	5	72	1	0	1	1023.46	1022.45	1	1022.47	-0.0157	337	344	1	48.87	0.091	R	DDFVEKDR	S				5f44fb3d-87a9-437e-8b6e-907154a5b7b8
1		gi|401787145	ribulose-1,5-bisphosphate carboxylase/oxygenase large subunit, partial (chloroplast) [Vasconcellea cauliflora]	190	50273	9	6	6	5	115	7	0	1	1257.69	1256.69	1	1256.68	0.0027	422	432	1	73.09	0.0027	R	DLARTGNEIIR	E				bcc600e8-1e0b-4157-b229-5a5a2d1d6899
1		gi|401787145	ribulose-1,5-bisphosphate carboxylase/oxygenase large subunit, partial (chloroplast) [Vasconcellea cauliflora]	190	50273	9	6	6	5	117	2	0	0	1261.75	1260.74	1	1260.71	0.0344	326	336	0	101.85	2.6e-06	R	DITLGFVDLLR	D				aa688366-6c2a-4175-bf1c-50be13a24142
1		gi|401787145	ribulose-1,5-bisphosphate carboxylase/oxygenase large subunit, partial (chloroplast) [Vasconcellea cauliflora]	190	50273	9	6	6	5	169	1	0	0	1451.6	1450.59	1	1450.61	-0.0268	188	199	0	93.29	1.2e-05	K	DDENVNSQPFMR	W				9add7bb2-334b-4be0-a06a-12b9ae6262a5
1		gi|401787145	ribulose-1,5-bisphosphate carboxylase/oxygenase large subunit, partial (chloroplast) [Vasconcellea cauliflora]	190	50273	9	6	6	5	177	1	0	0	1467.59	1466.59	1	1466.61	-0.0243	188	199	0	65.15	0.0069	K	DDENVNSQPFMR	W	Oxidation (M)	0.000000000010.0		8e07f201-6520-4ce6-8f0b-2a0050986e61
1		gi|401787145	ribulose-1,5-bisphosphate carboxylase/oxygenase large subunit, partial (chloroplast) [Vasconcellea cauliflora]	190	50273	9	6	6	5	178	1	0	0	1467.62	1466.62	1	1466.61	0.006	188	199	0	48.28	0.043	K	DDENVNSQPFMR	W	Oxidation (M)	0.000000000010.0		ad1d5914-626a-4824-8118-2641481df83c
1		gi|401787145	ribulose-1,5-bisphosphate carboxylase/oxygenase large subunit, partial (chloroplast) [Vasconcellea cauliflora]	190	50273	9	6	6	5	202	1	0	0	1546.77	1545.76	1	1545.73	0.0348	437	449	0	91.76	3e-05	K	WSPELAAACEVWK	E				94157d68-1ffb-41d7-be86-fa11548b3061
1		gi|20065630	ribulose bisphosphate carboxylase oxygenase large subunit [Drosera adelae]	190	45543	7	6	5	5	116	5	0	0	1261.66	1260.65	1	1260.62	0.0335	197	206	0	75.01	0.0017	R	FLFCAEAIYK	A				208f2f60-1cbb-4e5b-ba4a-a0138d994a65
1		gi|20065630	ribulose bisphosphate carboxylase oxygenase large subunit [Drosera adelae]	190	45543	7	6	5	5	117	2	0	0	1261.75	1260.74	1	1260.71	0.0344	319	329	0	101.85	2.6e-06	R	DITLGFVDLLR	D				aa688366-6c2a-4175-bf1c-50be13a24142
1		gi|20065630	ribulose bisphosphate carboxylase oxygenase large subunit [Drosera adelae]	190	45543	7	6	5	5	169	1	0	0	1451.6	1450.59	1	1450.61	-0.0268	181	192	0	93.29	1.2e-05	K	DDENVNSQPFMR	W				9add7bb2-334b-4be0-a06a-12b9ae6262a5
1		gi|20065630	ribulose bisphosphate carboxylase oxygenase large subunit [Drosera adelae]	190	45543	7	6	5	5	177	1	0	0	1467.59	1466.59	1	1466.61	-0.0243	181	192	0	65.15	0.0069	K	DDENVNSQPFMR	W	Oxidation (M)	0.000000000010.0		8e07f201-6520-4ce6-8f0b-2a0050986e61
1		gi|20065630	ribulose bisphosphate carboxylase oxygenase large subunit [Drosera adelae]	190	45543	7	6	5	5	178	1	0	0	1467.62	1466.62	1	1466.61	0.006	181	192	0	48.28	0.043	K	DDENVNSQPFMR	W	Oxidation (M)	0.000000000010.0		ad1d5914-626a-4824-8118-2641481df83c
1		gi|20065630	ribulose bisphosphate carboxylase oxygenase large subunit [Drosera adelae]	190	45543	7	6	5	5	190	1	0	0	1497.7	1496.69	1	1496.7	-0.0151	299	313	0	71.08	0.0016	R	MSGGDHIHSGTVVGK	L	Oxidation (M)	0.100000000000000.0		3010fe4d-82cd-4323-934a-cbbcc31a34ee
1		gi|20065630	ribulose bisphosphate carboxylase oxygenase large subunit [Drosera adelae]	190	45543	7	6	5	5	249	1	0	0	1810.88	1809.88	1	1809.8	0.0726	216	231	0	92.55	2.1e-05	K	GHYLNATAGTCEEMIK	R	Oxidation (M)	0.0000000000000100.0		cf4f86cf-da03-466e-86ba-b861b6db9e02
1		gi|11990175	ribulose-1,5-bisphosphate carboxylase/oxygenase large subunit [Batopedina pulvinellata]	189	52472	7	6	5	5	116	5	0	0	1261.66	1260.65	1	1260.62	0.0335	209	218	0	75.01	0.0017	R	FLFCAEAIYK	S				208f2f60-1cbb-4e5b-ba4a-a0138d994a65
1		gi|11990175	ribulose-1,5-bisphosphate carboxylase/oxygenase large subunit [Batopedina pulvinellata]	189	52472	7	6	5	5	117	2	0	0	1261.75	1260.74	1	1260.71	0.0344	331	341	0	101.85	2.6e-06	R	DITLGFVDLLR	D				aa688366-6c2a-4175-bf1c-50be13a24142
1		gi|11990175	ribulose-1,5-bisphosphate carboxylase/oxygenase large subunit [Batopedina pulvinellata]	189	52472	7	6	5	5	169	1	0	0	1451.6	1450.59	1	1450.61	-0.0268	193	204	0	93.29	1.2e-05	K	DDENVNSQPFMR	W				9add7bb2-334b-4be0-a06a-12b9ae6262a5
1		gi|11990175	ribulose-1,5-bisphosphate carboxylase/oxygenase large subunit [Batopedina pulvinellata]	189	52472	7	6	5	5	177	1	0	0	1467.59	1466.59	1	1466.61	-0.0243	193	204	0	65.15	0.0069	K	DDENVNSQPFMR	W	Oxidation (M)	0.000000000010.0		8e07f201-6520-4ce6-8f0b-2a0050986e61
1		gi|11990175	ribulose-1,5-bisphosphate carboxylase/oxygenase large subunit [Batopedina pulvinellata]	189	52472	7	6	5	5	178	1	0	0	1467.62	1466.62	1	1466.61	0.006	193	204	0	48.28	0.043	K	DDENVNSQPFMR	W	Oxidation (M)	0.000000000010.0		ad1d5914-626a-4824-8118-2641481df83c
1		gi|11990175	ribulose-1,5-bisphosphate carboxylase/oxygenase large subunit [Batopedina pulvinellata]	189	52472	7	6	5	5	190	1	0	0	1497.7	1496.69	1	1496.7	-0.0151	311	325	0	71.08	0.0016	R	MSGGDHIHSGTVVGK	L	Oxidation (M)	0.100000000000000.0		3010fe4d-82cd-4323-934a-cbbcc31a34ee
1		gi|11990175	ribulose-1,5-bisphosphate carboxylase/oxygenase large subunit [Batopedina pulvinellata]	189	52472	7	6	5	5	202	1	0	0	1546.77	1545.76	1	1545.73	0.0348	442	454	0	91.76	3e-05	K	WSPELAAACEVWK	E				94157d68-1ffb-41d7-be86-fa11548b3061
1		gi|3287899	RecName: Full=Ribulose bisphosphate carboxylase large chain; Short=RuBisCO large subunit	186	49932	7	6	5	5	70	1	0	0	1021.58	1020.58	1	1020.52	0.0536	24	32	0	77.84	0.00083	K	DTDILAAFR	V				84d29dc6-368b-4900-bd77-c856650145f7
1		gi|3287899	RecName: Full=Ribulose bisphosphate carboxylase large chain; Short=RuBisCO large subunit	186	49932	7	6	5	5	115	1	0	1	1257.69	1256.69	1	1256.64	0.0503	427	437	0	95.97	1.4e-05	R	DLAQEGNEIIR	E				bcc600e8-1e0b-4157-b229-5a5a2d1d6899
1		gi|3287899	RecName: Full=Ribulose bisphosphate carboxylase large chain; Short=RuBisCO large subunit	186	49932	7	6	5	5	116	5	0	0	1261.66	1260.65	1	1260.62	0.0335	209	218	0	75.01	0.0017	R	FLFCAEAIYK	A				208f2f60-1cbb-4e5b-ba4a-a0138d994a65
1		gi|3287899	RecName: Full=Ribulose bisphosphate carboxylase large chain; Short=RuBisCO large subunit	186	49932	7	6	5	5	169	1	0	0	1451.6	1450.59	1	1450.61	-0.0268	193	204	0	93.29	1.2e-05	K	DDENVNSQPFMR	W				9add7bb2-334b-4be0-a06a-12b9ae6262a5
1		gi|3287899	RecName: Full=Ribulose bisphosphate carboxylase large chain; Short=RuBisCO large subunit	186	49932	7	6	5	5	177	1	0	0	1467.59	1466.59	1	1466.61	-0.0243	193	204	0	65.15	0.0069	K	DDENVNSQPFMR	W	Oxidation (M)	0.000000000010.0		8e07f201-6520-4ce6-8f0b-2a0050986e61
1		gi|3287899	RecName: Full=Ribulose bisphosphate carboxylase large chain; Short=RuBisCO large subunit	186	49932	7	6	5	5	178	1	0	0	1467.62	1466.62	1	1466.61	0.006	193	204	0	48.28	0.043	K	DDENVNSQPFMR	W	Oxidation (M)	0.000000000010.0		ad1d5914-626a-4824-8118-2641481df83c
1		gi|3287899	RecName: Full=Ribulose bisphosphate carboxylase large chain; Short=RuBisCO large subunit	186	49932	7	6	5	5	249	1	0	0	1810.88	1809.88	1	1809.8	0.0726	228	243	0	92.55	2.1e-05	K	GHYLNATAGTCEEMIK	R	Oxidation (M)	0.0000000000000100.0		cf4f86cf-da03-466e-86ba-b861b6db9e02
1		gi|308054923	ribulose-1,5-bisphosphate carboxylase/oxygenase large subunit [Epimedium koreanum]	186	33841	7	6	4	4	116	5	0	0	1261.66	1260.65	1	1260.62	0.0335	103	112	0	75.01	0.0017	R	FLFCAEAIYK	S				208f2f60-1cbb-4e5b-ba4a-a0138d994a65
1		gi|308054923	ribulose-1,5-bisphosphate carboxylase/oxygenase large subunit [Epimedium koreanum]	186	33841	7	6	4	4	144	1	0	1	1315.73	1314.72	1	1314.7	0.0272	2	13	0	61.79	9.4e-05	M	FTSIVGNVFGFK	A				014fece4-4058-40a5-9ee9-4e58a2907960
1		gi|308054923	ribulose-1,5-bisphosphate carboxylase/oxygenase large subunit [Epimedium koreanum]	186	33841	7	6	4	4	169	1	0	0	1451.6	1450.59	1	1450.61	-0.0268	87	98	0	93.29	1.2e-05	K	DDENVNSQPFMR	W				9add7bb2-334b-4be0-a06a-12b9ae6262a5
1		gi|308054923	ribulose-1,5-bisphosphate carboxylase/oxygenase large subunit [Epimedium koreanum]	186	33841	7	6	4	4	174	1	0	1	1462.77	1461.76	1	1461.73	0.0269	1	13	0	94.78	1.6e-05	-	MFTSIVGNVFGFK	A	Oxidation (M)	0.1000000000000.0		fe897e45-530a-4e1b-8bcb-c3ca28fba215
1		gi|308054923	ribulose-1,5-bisphosphate carboxylase/oxygenase large subunit [Epimedium koreanum]	186	33841	7	6	4	4	175	1	0	1	1462.77	1461.76	1	1461.73	0.0294	1	13	0	77.85	4.1e-05	-	MFTSIVGNVFGFK	A	Oxidation (M)	0.1000000000000.0		c4806180-14c9-4abe-8c44-16d22e727aff
1		gi|308054923	ribulose-1,5-bisphosphate carboxylase/oxygenase large subunit [Epimedium koreanum]	186	33841	7	6	4	4	177	1	0	0	1467.59	1466.59	1	1466.61	-0.0243	87	98	0	65.15	0.0069	K	DDENVNSQPFMR	W	Oxidation (M)	0.000000000010.0		8e07f201-6520-4ce6-8f0b-2a0050986e61
1		gi|308054923	ribulose-1,5-bisphosphate carboxylase/oxygenase large subunit [Epimedium koreanum]	186	33841	7	6	4	4	178	1	0	0	1467.62	1466.62	1	1466.61	0.006	87	98	0	48.28	0.043	K	DDENVNSQPFMR	W	Oxidation (M)	0.000000000010.0		ad1d5914-626a-4824-8118-2641481df83c
1		gi|499068539	ribulose-1,5-bisphosphate carboxylase large subunit, partial (chloroplast) [Walleria gracilis]	186	49775	7	6	5	5	70	1	0	0	1021.58	1020.58	1	1020.52	0.0536	22	30	0	77.84	0.00083	K	DTDILAAFR	V				84d29dc6-368b-4900-bd77-c856650145f7
1		gi|499068539	ribulose-1,5-bisphosphate carboxylase large subunit, partial (chloroplast) [Walleria gracilis]	186	49775	7	6	5	5	115	1	0	1	1257.69	1256.69	1	1256.67	0.014	425	435	1	95.97	1.4e-05	R	DLAKEGNEIIR	E				bcc600e8-1e0b-4157-b229-5a5a2d1d6899
1		gi|499068539	ribulose-1,5-bisphosphate carboxylase large subunit, partial (chloroplast) [Walleria gracilis]	186	49775	7	6	5	5	169	1	0	0	1451.6	1450.59	1	1450.61	-0.0268	191	202	0	93.29	1.2e-05	K	DDENVNSQPFMR	W				9add7bb2-334b-4be0-a06a-12b9ae6262a5
1		gi|499068539	ribulose-1,5-bisphosphate carboxylase large subunit, partial (chloroplast) [Walleria gracilis]	186	49775	7	6	5	5	177	1	0	0	1467.59	1466.59	1	1466.61	-0.0243	191	202	0	65.15	0.0069	K	DDENVNSQPFMR	W	Oxidation (M)	0.000000000010.0		8e07f201-6520-4ce6-8f0b-2a0050986e61
1		gi|499068539	ribulose-1,5-bisphosphate carboxylase large subunit, partial (chloroplast) [Walleria gracilis]	186	49775	7	6	5	5	178	1	0	0	1467.62	1466.62	1	1466.61	0.006	191	202	0	48.28	0.043	K	DDENVNSQPFMR	W	Oxidation (M)	0.000000000010.0		ad1d5914-626a-4824-8118-2641481df83c
1		gi|499068539	ribulose-1,5-bisphosphate carboxylase large subunit, partial (chloroplast) [Walleria gracilis]	186	49775	7	6	5	5	190	1	0	0	1497.7	1496.69	1	1496.7	-0.0151	309	323	0	71.08	0.0016	R	MSGGDHIHSGTVVGK	L	Oxidation (M)	0.100000000000000.0		3010fe4d-82cd-4323-934a-cbbcc31a34ee
1		gi|499068539	ribulose-1,5-bisphosphate carboxylase large subunit, partial (chloroplast) [Walleria gracilis]	186	49775	7	6	5	5	249	1	0	0	1810.88	1809.88	1	1809.8	0.0726	226	241	0	92.55	2.1e-05	K	GHYLNATAGTCEEMIK	R	Oxidation (M)	0.0000000000000100.0		cf4f86cf-da03-466e-86ba-b861b6db9e02
1		gi|21633955	ribulose-1,5-bisphosphate carboxylase/oxygenase large subunit [Ipomoea aquatica]	186	51322	9	6	6	5	70	1	0	0	1021.58	1020.58	1	1020.52	0.0536	23	31	0	77.84	0.00083	K	DTDILAAFR	V				84d29dc6-368b-4900-bd77-c856650145f7
1		gi|21633955	ribulose-1,5-bisphosphate carboxylase/oxygenase large subunit [Ipomoea aquatica]	186	51322	9	6	6	5	71	1	0	1	1023.46	1022.45	1	1022.43	0.019	341	348	0	50.68	0.092	R	DDFVEQDR	S				bffdb68b-84c5-40f5-a550-eb469cc6c48d
1		gi|21633955	ribulose-1,5-bisphosphate carboxylase/oxygenase large subunit [Ipomoea aquatica]	186	51322	9	6	6	5	72	1	0	1	1023.46	1022.45	1	1022.43	0.0206	341	348	0	48.87	0.091	R	DDFVEQDR	S				5f44fb3d-87a9-437e-8b6e-907154a5b7b8
1		gi|21633955	ribulose-1,5-bisphosphate carboxylase/oxygenase large subunit [Ipomoea aquatica]	186	51322	9	6	6	5	115	1	0	1	1257.69	1256.69	1	1256.64	0.0503	426	436	0	95.97	1.4e-05	R	DLAQEGNEIIR	Q				bcc600e8-1e0b-4157-b229-5a5a2d1d6899
1		gi|21633955	ribulose-1,5-bisphosphate carboxylase/oxygenase large subunit [Ipomoea aquatica]	186	51322	9	6	6	5	116	5	0	0	1261.66	1260.65	1	1260.62	0.0335	208	217	0	75.01	0.0017	R	FLFCAEAIYK	A				208f2f60-1cbb-4e5b-ba4a-a0138d994a65
1		gi|21633955	ribulose-1,5-bisphosphate carboxylase/oxygenase large subunit [Ipomoea aquatica]	186	51322	9	6	6	5	169	1	0	0	1451.6	1450.59	1	1450.61	-0.0268	192	203	0	93.29	1.2e-05	K	DDENVNSQPFMR	W				9add7bb2-334b-4be0-a06a-12b9ae6262a5
1		gi|21633955	ribulose-1,5-bisphosphate carboxylase/oxygenase large subunit [Ipomoea aquatica]	186	51322	9	6	6	5	177	1	0	0	1467.59	1466.59	1	1466.61	-0.0243	192	203	0	65.15	0.0069	K	DDENVNSQPFMR	W	Oxidation (M)	0.000000000010.0		8e07f201-6520-4ce6-8f0b-2a0050986e61
1		gi|21633955	ribulose-1,5-bisphosphate carboxylase/oxygenase large subunit [Ipomoea aquatica]	186	51322	9	6	6	5	178	1	0	0	1467.62	1466.62	1	1466.61	0.006	192	203	0	48.28	0.043	K	DDENVNSQPFMR	W	Oxidation (M)	0.000000000010.0		ad1d5914-626a-4824-8118-2641481df83c
1		gi|21633955	ribulose-1,5-bisphosphate carboxylase/oxygenase large subunit [Ipomoea aquatica]	186	51322	9	6	6	5	202	1	0	0	1546.77	1545.76	1	1545.73	0.0348	441	453	0	91.76	3e-05	K	WSPELAAACEVWK	E				94157d68-1ffb-41d7-be86-fa11548b3061
1		gi|926943	cryptic speciation protein, partial (chloroplast) [Botrychium lunaria]	186	37677	7	6	4	4	144	1	0	1	1315.73	1314.72	1	1314.7	0.0272	2	13	0	61.79	9.4e-05	M	FTSIVGNVFGFK	A				014fece4-4058-40a5-9ee9-4e58a2907960
1		gi|926943	cryptic speciation protein, partial (chloroplast) [Botrychium lunaria]	186	37677	7	6	4	4	169	1	0	0	1451.6	1450.59	1	1450.61	-0.0268	87	98	0	93.29	1.2e-05	K	DDENVNSQPFMR	W				9add7bb2-334b-4be0-a06a-12b9ae6262a5
1		gi|926943	cryptic speciation protein, partial (chloroplast) [Botrychium lunaria]	186	37677	7	6	4	4	174	1	0	1	1462.77	1461.76	1	1461.73	0.0269	1	13	0	94.78	1.6e-05	-	MFTSIVGNVFGFK	A	Oxidation (M)	0.1000000000000.0		fe897e45-530a-4e1b-8bcb-c3ca28fba215
1		gi|926943	cryptic speciation protein, partial (chloroplast) [Botrychium lunaria]	186	37677	7	6	4	4	175	1	0	1	1462.77	1461.76	1	1461.73	0.0294	1	13	0	77.85	4.1e-05	-	MFTSIVGNVFGFK	A	Oxidation (M)	0.1000000000000.0		c4806180-14c9-4abe-8c44-16d22e727aff
1		gi|926943	cryptic speciation protein, partial (chloroplast) [Botrychium lunaria]	186	37677	7	6	4	4	177	1	0	0	1467.59	1466.59	1	1466.61	-0.0243	87	98	0	65.15	0.0069	K	DDENVNSQPFMR	W	Oxidation (M)	0.000000000010.0		8e07f201-6520-4ce6-8f0b-2a0050986e61
1		gi|926943	cryptic speciation protein, partial (chloroplast) [Botrychium lunaria]	186	37677	7	6	4	4	178	1	0	0	1467.62	1466.62	1	1466.61	0.006	87	98	0	48.28	0.043	K	DDENVNSQPFMR	W	Oxidation (M)	0.000000000010.0		ad1d5914-626a-4824-8118-2641481df83c
1		gi|926943	cryptic speciation protein, partial (chloroplast) [Botrychium lunaria]	186	37677	7	6	4	4	190	1	0	0	1497.7	1496.69	1	1496.7	-0.0151	205	219	0	71.08	0.0016	R	MSGGDHIHSGTVVGK	L	Oxidation (M)	0.100000000000000.0		3010fe4d-82cd-4323-934a-cbbcc31a34ee
1		gi|1050730	ribulose-1,5-bisphosphate carboxylase [Ophiorrhiza mungos]	185	52523	5	5	5	5	70	1	0	0	1021.58	1020.58	1	1020.52	0.0536	24	32	0	77.84	0.00083	K	DTDILAAFR	V				84d29dc6-368b-4900-bd77-c856650145f7
1		gi|1050730	ribulose-1,5-bisphosphate carboxylase [Ophiorrhiza mungos]	185	52523	5	5	5	5	116	5	0	0	1261.66	1260.65	1	1260.62	0.0335	209	218	0	75.01	0.0017	R	FLFCAEAIYK	S				208f2f60-1cbb-4e5b-ba4a-a0138d994a65
1		gi|1050730	ribulose-1,5-bisphosphate carboxylase [Ophiorrhiza mungos]	185	52523	5	5	5	5	117	2	0	0	1261.75	1260.74	1	1260.71	0.0344	331	341	0	101.85	2.6e-06	R	DITLGFVDLLR	D				aa688366-6c2a-4175-bf1c-50be13a24142
1		gi|1050730	ribulose-1,5-bisphosphate carboxylase [Ophiorrhiza mungos]	185	52523	5	5	5	5	202	1	0	0	1546.77	1545.76	1	1545.73	0.0348	442	454	0	91.76	3e-05	K	WSPELAAACEVWK	E				94157d68-1ffb-41d7-be86-fa11548b3061
1		gi|1050730	ribulose-1,5-bisphosphate carboxylase [Ophiorrhiza mungos]	185	52523	5	5	5	5	249	1	0	0	1810.88	1809.88	1	1809.8	0.0726	228	243	0	92.55	2.1e-05	K	GHYLNATAGTCEEMIK	R	Oxidation (M)	0.0000000000000100.0		cf4f86cf-da03-466e-86ba-b861b6db9e02
1		gi|11558782	ribulose-1,5-bisphosphate carboxylase/oxygenase large subunit [Johannesteijsmannia altifrons]	185	52492	7	6	5	5	70	1	0	0	1021.58	1020.58	1	1020.52	0.0536	26	34	0	77.84	0.00083	K	DTDILAAFR	V				84d29dc6-368b-4900-bd77-c856650145f7
1		gi|11558782	ribulose-1,5-bisphosphate carboxylase/oxygenase large subunit [Johannesteijsmannia altifrons]	185	52492	7	6	5	5	116	1	0	1	1261.66	1260.65	1	1260.62	0.0335	211	220	0	77.06	0.0011	R	FIFCAEALYK	A				208f2f60-1cbb-4e5b-ba4a-a0138d994a65
1		gi|11558782	ribulose-1,5-bisphosphate carboxylase/oxygenase large subunit [Johannesteijsmannia altifrons]	185	52492	7	6	5	5	169	1	0	0	1451.6	1450.59	1	1450.61	-0.0268	195	206	0	93.29	1.2e-05	K	DDENVNSQPFMR	W				9add7bb2-334b-4be0-a06a-12b9ae6262a5
1		gi|11558782	ribulose-1,5-bisphosphate carboxylase/oxygenase large subunit [Johannesteijsmannia altifrons]	185	52492	7	6	5	5	177	1	0	0	1467.59	1466.59	1	1466.61	-0.0243	195	206	0	65.15	0.0069	K	DDENVNSQPFMR	W	Oxidation (M)	0.000000000010.0		8e07f201-6520-4ce6-8f0b-2a0050986e61
1		gi|11558782	ribulose-1,5-bisphosphate carboxylase/oxygenase large subunit [Johannesteijsmannia altifrons]	185	52492	7	6	5	5	178	1	0	0	1467.62	1466.62	1	1466.61	0.006	195	206	0	48.28	0.043	K	DDENVNSQPFMR	W	Oxidation (M)	0.000000000010.0		ad1d5914-626a-4824-8118-2641481df83c
1		gi|11558782	ribulose-1,5-bisphosphate carboxylase/oxygenase large subunit [Johannesteijsmannia altifrons]	185	52492	7	6	5	5	202	1	0	0	1546.77	1545.76	1	1545.73	0.0348	444	456	0	91.76	3e-05	K	WSPELAAACEVWK	A				94157d68-1ffb-41d7-be86-fa11548b3061
1		gi|11558782	ribulose-1,5-bisphosphate carboxylase/oxygenase large subunit [Johannesteijsmannia altifrons]	185	52492	7	6	5	5	249	1	0	0	1810.88	1809.88	1	1809.8	0.0726	230	245	0	92.55	2.1e-05	K	GHYLNATAGTCEEMIK	R	Oxidation (M)	0.0000000000000100.0		cf4f86cf-da03-466e-86ba-b861b6db9e02
1		gi|499068537	ribulose-1,5-bisphosphate carboxylase large subunit, partial (chloroplast) [Odontostomum hartwegii]	185	49650	8	7	6	6	70	1	0	0	1021.58	1020.58	1	1020.52	0.0536	22	30	0	77.84	0.00083	K	DTDILAAFR	V				84d29dc6-368b-4900-bd77-c856650145f7
1		gi|499068537	ribulose-1,5-bisphosphate carboxylase large subunit, partial (chloroplast) [Odontostomum hartwegii]	185	49650	8	7	6	6	115	6	0	1	1257.69	1256.69	1	1256.68	0.0027	425	435	1	83.84	0.00022	R	DLATRGNEIIR	E				bcc600e8-1e0b-4157-b229-5a5a2d1d6899
1		gi|499068537	ribulose-1,5-bisphosphate carboxylase large subunit, partial (chloroplast) [Odontostomum hartwegii]	185	49650	8	7	6	6	116	5	0	0	1261.66	1260.65	1	1260.62	0.0335	207	216	0	75.01	0.0017	R	FLFCAEAIYK	A				208f2f60-1cbb-4e5b-ba4a-a0138d994a65
1		gi|499068537	ribulose-1,5-bisphosphate carboxylase large subunit, partial (chloroplast) [Odontostomum hartwegii]	185	49650	8	7	6	6	169	1	0	0	1451.6	1450.59	1	1450.61	-0.0268	191	202	0	93.29	1.2e-05	K	DDENVNSQPFMR	W				9add7bb2-334b-4be0-a06a-12b9ae6262a5
1		gi|499068537	ribulose-1,5-bisphosphate carboxylase large subunit, partial (chloroplast) [Odontostomum hartwegii]	185	49650	8	7	6	6	177	1	0	0	1467.59	1466.59	1	1466.61	-0.0243	191	202	0	65.15	0.0069	K	DDENVNSQPFMR	W	Oxidation (M)	0.000000000010.0		8e07f201-6520-4ce6-8f0b-2a0050986e61
1		gi|499068537	ribulose-1,5-bisphosphate carboxylase large subunit, partial (chloroplast) [Odontostomum hartwegii]	185	49650	8	7	6	6	178	1	0	0	1467.62	1466.62	1	1466.61	0.006	191	202	0	48.28	0.043	K	DDENVNSQPFMR	W	Oxidation (M)	0.000000000010.0		ad1d5914-626a-4824-8118-2641481df83c
1		gi|499068537	ribulose-1,5-bisphosphate carboxylase large subunit, partial (chloroplast) [Odontostomum hartwegii]	185	49650	8	7	6	6	190	1	0	0	1497.7	1496.69	1	1496.7	-0.0151	309	323	0	71.08	0.0016	R	MSGGDHIHSGTVVGK	L	Oxidation (M)	0.100000000000000.0		3010fe4d-82cd-4323-934a-cbbcc31a34ee
1		gi|499068537	ribulose-1,5-bisphosphate carboxylase large subunit, partial (chloroplast) [Odontostomum hartwegii]	185	49650	8	7	6	6	249	1	0	0	1810.88	1809.88	1	1809.8	0.0726	226	241	0	92.55	2.1e-05	K	GHYLNATAGTCEEMIK	R	Oxidation (M)	0.0000000000000100.0		cf4f86cf-da03-466e-86ba-b861b6db9e02
1		gi|188526487	ribulose-1,5-bisphosphate carboxylase/oxygenase large subunit [Agelanthus sansibarensis]	185	50958	5	5	5	5	70	1	0	0	1021.58	1020.58	1	1020.52	0.0536	16	24	0	77.84	0.00083	K	DTDILAAFR	V				84d29dc6-368b-4900-bd77-c856650145f7
1		gi|188526487	ribulose-1,5-bisphosphate carboxylase/oxygenase large subunit [Agelanthus sansibarensis]	185	50958	5	5	5	5	117	2	0	0	1261.75	1260.74	1	1260.71	0.0344	323	333	0	101.85	2.6e-06	R	DITLGFVDLLR	D				aa688366-6c2a-4175-bf1c-50be13a24142
1		gi|188526487	ribulose-1,5-bisphosphate carboxylase/oxygenase large subunit [Agelanthus sansibarensis]	185	50958	5	5	5	5	190	1	0	0	1497.7	1496.69	1	1496.7	-0.0151	303	317	0	71.08	0.0016	R	MSGGDHIHSGTVVGK	L	Oxidation (M)	0.100000000000000.0		3010fe4d-82cd-4323-934a-cbbcc31a34ee
1		gi|188526487	ribulose-1,5-bisphosphate carboxylase/oxygenase large subunit [Agelanthus sansibarensis]	185	50958	5	5	5	5	202	1	0	0	1546.77	1545.76	1	1545.73	0.0348	434	446	0	91.76	3e-05	K	WSPELAAACEVWK	E				94157d68-1ffb-41d7-be86-fa11548b3061
1		gi|188526487	ribulose-1,5-bisphosphate carboxylase/oxygenase large subunit [Agelanthus sansibarensis]	185	50958	5	5	5	5	249	1	0	0	1810.88	1809.88	1	1809.8	0.0726	220	235	0	92.55	2.1e-05	K	GHYLNATAGTCEEMIK	R	Oxidation (M)	0.0000000000000100.0		cf4f86cf-da03-466e-86ba-b861b6db9e02
1		gi|306481954	ribulose-1,5-bisphosphate carboxylase/oxygenase large subunit [Solanum sp. SH-2010]	184	49302	6	5	4	4	70	1	0	0	1021.58	1020.58	1	1020.52	0.0536	20	28	0	77.84	0.00083	K	DTDILAAFR	V				84d29dc6-368b-4900-bd77-c856650145f7
1		gi|306481954	ribulose-1,5-bisphosphate carboxylase/oxygenase large subunit [Solanum sp. SH-2010]	184	49302	6	5	4	4	115	1	0	1	1257.69	1256.69	1	1256.64	0.0503	423	433	0	95.97	1.4e-05	R	DLAQEGNEIIR	E				bcc600e8-1e0b-4157-b229-5a5a2d1d6899
1		gi|306481954	ribulose-1,5-bisphosphate carboxylase/oxygenase large subunit [Solanum sp. SH-2010]	184	49302	6	5	4	4	117	2	0	0	1261.75	1260.74	1	1260.71	0.0344	327	337	0	101.85	2.6e-06	R	DITLGFVDLLR	D				aa688366-6c2a-4175-bf1c-50be13a24142
1		gi|306481954	ribulose-1,5-bisphosphate carboxylase/oxygenase large subunit [Solanum sp. SH-2010]	184	49302	6	5	4	4	169	1	0	0	1451.6	1450.59	1	1450.61	-0.0268	189	200	0	93.29	1.2e-05	K	DDENVNSQPFMR	W				9add7bb2-334b-4be0-a06a-12b9ae6262a5
1		gi|306481954	ribulose-1,5-bisphosphate carboxylase/oxygenase large subunit [Solanum sp. SH-2010]	184	49302	6	5	4	4	177	1	0	0	1467.59	1466.59	1	1466.61	-0.0243	189	200	0	65.15	0.0069	K	DDENVNSQPFMR	W	Oxidation (M)	0.000000000010.0		8e07f201-6520-4ce6-8f0b-2a0050986e61
1		gi|306481954	ribulose-1,5-bisphosphate carboxylase/oxygenase large subunit [Solanum sp. SH-2010]	184	49302	6	5	4	4	178	1	0	0	1467.62	1466.62	1	1466.61	0.006	189	200	0	48.28	0.043	K	DDENVNSQPFMR	W	Oxidation (M)	0.000000000010.0		ad1d5914-626a-4824-8118-2641481df83c
1		gi|10764587	ribulose-1,5-biphosphate carboxylase/oxygenase large subunit [Caldcluvia paniculata]	183	51539	7	6	5	5	70	1	0	0	1021.58	1020.58	1	1020.52	0.0536	19	27	0	77.84	0.00083	K	DTDILAAFR	V				84d29dc6-368b-4900-bd77-c856650145f7
1		gi|10764587	ribulose-1,5-biphosphate carboxylase/oxygenase large subunit [Caldcluvia paniculata]	183	51539	7	6	5	5	116	5	0	0	1261.66	1260.65	1	1260.62	0.0335	204	213	0	75.01	0.0017	R	FLFCAEAIYK	A				208f2f60-1cbb-4e5b-ba4a-a0138d994a65
1		gi|10764587	ribulose-1,5-biphosphate carboxylase/oxygenase large subunit [Caldcluvia paniculata]	183	51539	7	6	5	5	169	1	0	0	1451.6	1450.59	1	1450.61	-0.0268	188	199	0	93.29	1.2e-05	K	DDENVNSQPFMR	W				9add7bb2-334b-4be0-a06a-12b9ae6262a5
1		gi|10764587	ribulose-1,5-biphosphate carboxylase/oxygenase large subunit [Caldcluvia paniculata]	183	51539	7	6	5	5	177	1	0	0	1467.59	1466.59	1	1466.61	-0.0243	188	199	0	65.15	0.0069	K	DDENVNSQPFMR	W	Oxidation (M)	0.000000000010.0		8e07f201-6520-4ce6-8f0b-2a0050986e61
1		gi|10764587	ribulose-1,5-biphosphate carboxylase/oxygenase large subunit [Caldcluvia paniculata]	183	51539	7	6	5	5	178	1	0	0	1467.62	1466.62	1	1466.61	0.006	188	199	0	48.28	0.043	K	DDENVNSQPFMR	W	Oxidation (M)	0.000000000010.0		ad1d5914-626a-4824-8118-2641481df83c
1		gi|10764587	ribulose-1,5-biphosphate carboxylase/oxygenase large subunit [Caldcluvia paniculata]	183	51539	7	6	5	5	202	1	0	0	1546.77	1545.76	1	1545.73	0.0348	437	449	0	91.76	3e-05	K	WSPELAAACEVWK	E				94157d68-1ffb-41d7-be86-fa11548b3061
1		gi|10764587	ribulose-1,5-biphosphate carboxylase/oxygenase large subunit [Caldcluvia paniculata]	183	51539	7	6	5	5	249	1	0	0	1810.88	1809.88	1	1809.8	0.0726	223	238	0	92.55	2.1e-05	K	GHYLNATAGTCEEMIK	R	Oxidation (M)	0.0000000000000100.0		cf4f86cf-da03-466e-86ba-b861b6db9e02
1		gi|10764601	ribulose-1,5-biphosphate carboxylase/oxygenase large subunit [Codia discolor]	183	51372	7	6	5	5	70	1	0	0	1021.58	1020.58	1	1020.52	0.0536	16	24	0	77.84	0.00083	K	DTDILAAFR	V				84d29dc6-368b-4900-bd77-c856650145f7
1		gi|10764601	ribulose-1,5-biphosphate carboxylase/oxygenase large subunit [Codia discolor]	183	51372	7	6	5	5	169	1	0	0	1451.6	1450.59	1	1450.61	-0.0268	185	196	0	93.29	1.2e-05	K	DDENVNSQPFMR	W				9add7bb2-334b-4be0-a06a-12b9ae6262a5
1		gi|10764601	ribulose-1,5-biphosphate carboxylase/oxygenase large subunit [Codia discolor]	183	51372	7	6	5	5	177	1	0	0	1467.59	1466.59	1	1466.61	-0.0243	185	196	0	65.15	0.0069	K	DDENVNSQPFMR	W	Oxidation (M)	0.000000000010.0		8e07f201-6520-4ce6-8f0b-2a0050986e61
1		gi|10764601	ribulose-1,5-biphosphate carboxylase/oxygenase large subunit [Codia discolor]	183	51372	7	6	5	5	178	1	0	0	1467.62	1466.62	1	1466.61	0.006	185	196	0	48.28	0.043	K	DDENVNSQPFMR	W	Oxidation (M)	0.000000000010.0		ad1d5914-626a-4824-8118-2641481df83c
1		gi|10764601	ribulose-1,5-biphosphate carboxylase/oxygenase large subunit [Codia discolor]	183	51372	7	6	5	5	190	1	0	0	1497.7	1496.69	1	1496.7	-0.0151	303	317	0	71.08	0.0016	R	MSGGDHIHSGTVVGK	L	Oxidation (M)	0.100000000000000.0		3010fe4d-82cd-4323-934a-cbbcc31a34ee
1		gi|10764601	ribulose-1,5-biphosphate carboxylase/oxygenase large subunit [Codia discolor]	183	51372	7	6	5	5	202	1	0	0	1546.77	1545.76	1	1545.73	0.0348	434	446	0	91.76	3e-05	K	WSPELAAACEVWK	E				94157d68-1ffb-41d7-be86-fa11548b3061
1		gi|10764601	ribulose-1,5-biphosphate carboxylase/oxygenase large subunit [Codia discolor]	183	51372	7	6	5	5	249	1	0	0	1810.88	1809.88	1	1809.8	0.0726	220	235	0	92.55	2.1e-05	K	GHYLNATAGTCEEMIK	R	Oxidation (M)	0.0000000000000100.0		cf4f86cf-da03-466e-86ba-b861b6db9e02
1		gi|4538584	ribulose-1,5-bisphosphate carboxylase/oxygenase [Forstera bidwillii]	182	52096	7	6	5	5	115	1	0	1	1257.69	1256.69	1	1256.67	0.014	427	437	1	95.97	1.4e-05	R	DLAKEGNEIIR	E				bcc600e8-1e0b-4157-b229-5a5a2d1d6899
1		gi|4538584	ribulose-1,5-bisphosphate carboxylase/oxygenase [Forstera bidwillii]	182	52096	7	6	5	5	116	5	0	1	1261.66	1260.65	1	1260.62	0.0335	209	218	0	75.01	0.0017	R	FLFCAEAIYK	A				208f2f60-1cbb-4e5b-ba4a-a0138d994a65
1		gi|4538584	ribulose-1,5-bisphosphate carboxylase/oxygenase [Forstera bidwillii]	182	52096	7	6	5	5	169	1	0	0	1451.6	1450.59	1	1450.61	-0.0268	193	204	0	93.29	1.2e-05	K	DDENVNSQPFMR	W				9add7bb2-334b-4be0-a06a-12b9ae6262a5
1		gi|4538584	ribulose-1,5-bisphosphate carboxylase/oxygenase [Forstera bidwillii]	182	52096	7	6	5	5	177	1	0	0	1467.59	1466.59	1	1466.61	-0.0243	193	204	0	65.15	0.0069	K	DDENVNSQPFMR	W	Oxidation (M)	0.000000000010.0		8e07f201-6520-4ce6-8f0b-2a0050986e61
1		gi|4538584	ribulose-1,5-bisphosphate carboxylase/oxygenase [Forstera bidwillii]	182	52096	7	6	5	5	178	1	0	0	1467.62	1466.62	1	1466.61	0.006	193	204	0	48.28	0.043	K	DDENVNSQPFMR	W	Oxidation (M)	0.000000000010.0		ad1d5914-626a-4824-8118-2641481df83c
1		gi|4538584	ribulose-1,5-bisphosphate carboxylase/oxygenase [Forstera bidwillii]	182	52096	7	6	5	5	190	1	0	0	1497.7	1496.69	1	1496.7	-0.0151	311	325	0	71.08	0.0016	R	MSGGDHIHSGTVVGK	L	Oxidation (M)	0.100000000000000.0		3010fe4d-82cd-4323-934a-cbbcc31a34ee
1		gi|4538584	ribulose-1,5-bisphosphate carboxylase/oxygenase [Forstera bidwillii]	182	52096	7	6	5	5	202	1	0	0	1546.77	1545.76	1	1545.73	0.0348	442	454	0	91.76	3e-05	K	WSPELAAACEVWK	E				94157d68-1ffb-41d7-be86-fa11548b3061
1		gi|10048140	ribulose 1,5-bisphosphate carboxylase [Harrisonia perforata]	182	52498	8	5	5	4	70	1	0	0	1021.58	1020.58	1	1020.52	0.0536	27	35	0	77.84	0.00083	K	DTDILAAFR	V				84d29dc6-368b-4900-bd77-c856650145f7
1		gi|10048140	ribulose 1,5-bisphosphate carboxylase [Harrisonia perforata]	182	52498	8	5	5	4	71	1	0	1	1023.46	1022.45	1	1022.47	-0.0173	345	352	1	50.68	0.092	R	DDFVEKDR	S				bffdb68b-84c5-40f5-a550-eb469cc6c48d
1		gi|10048140	ribulose 1,5-bisphosphate carboxylase [Harrisonia perforata]	182	52498	8	5	5	4	72	1	0	1	1023.46	1022.45	1	1022.47	-0.0157	345	352	1	48.87	0.091	R	DDFVEKDR	S				5f44fb3d-87a9-437e-8b6e-907154a5b7b8
1		gi|10048140	ribulose 1,5-bisphosphate carboxylase [Harrisonia perforata]	182	52498	8	5	5	4	117	2	0	0	1261.75	1260.74	1	1260.71	0.0344	334	344	0	101.85	2.6e-06	R	DITLGFVDLLR	D				aa688366-6c2a-4175-bf1c-50be13a24142
1		gi|10048140	ribulose 1,5-bisphosphate carboxylase [Harrisonia perforata]	182	52498	8	5	5	4	169	1	0	0	1451.6	1450.59	1	1450.61	-0.0268	196	207	0	93.29	1.2e-05	K	DDENVNSQPFMR	W				9add7bb2-334b-4be0-a06a-12b9ae6262a5
1		gi|10048140	ribulose 1,5-bisphosphate carboxylase [Harrisonia perforata]	182	52498	8	5	5	4	177	1	0	0	1467.59	1466.59	1	1466.61	-0.0243	196	207	0	65.15	0.0069	K	DDENVNSQPFMR	W	Oxidation (M)	0.000000000010.0		8e07f201-6520-4ce6-8f0b-2a0050986e61
1		gi|10048140	ribulose 1,5-bisphosphate carboxylase [Harrisonia perforata]	182	52498	8	5	5	4	178	1	0	0	1467.62	1466.62	1	1466.61	0.006	196	207	0	48.28	0.043	K	DDENVNSQPFMR	W	Oxidation (M)	0.000000000010.0		ad1d5914-626a-4824-8118-2641481df83c
1		gi|10048140	ribulose 1,5-bisphosphate carboxylase [Harrisonia perforata]	182	52498	8	5	5	4	249	1	0	0	1810.88	1809.88	1	1809.8	0.0726	231	246	0	92.55	2.1e-05	K	GHYLNATAGTCEEMIK	R	Oxidation (M)	0.0000000000000100.0		cf4f86cf-da03-466e-86ba-b861b6db9e02
1		gi|338795975	ribulose-1.5-bisphosphate carboxylase/oxygenase large subunit, partial (chloroplast) [Rhipsalis neves-armondii f. neves-armondii]	181	49560	6	5	4	4	116	1	0	1	1261.66	1260.65	1	1260.62	0.0335	209	218	0	77.06	0.0011	R	FIFCAEAIYK	A				208f2f60-1cbb-4e5b-ba4a-a0138d994a65
1		gi|338795975	ribulose-1.5-bisphosphate carboxylase/oxygenase large subunit, partial (chloroplast) [Rhipsalis neves-armondii f. neves-armondii]	181	49560	6	5	4	4	117	2	0	0	1261.75	1260.74	1	1260.71	0.0344	331	341	0	101.85	2.6e-06	R	DITLGFVDLLR	D				aa688366-6c2a-4175-bf1c-50be13a24142
1		gi|338795975	ribulose-1.5-bisphosphate carboxylase/oxygenase large subunit, partial (chloroplast) [Rhipsalis neves-armondii f. neves-armondii]	181	49560	6	5	4	4	169	1	0	0	1451.6	1450.59	1	1450.61	-0.0268	193	204	0	93.29	1.2e-05	K	DDENVNSQPFMR	W				9add7bb2-334b-4be0-a06a-12b9ae6262a5
1		gi|338795975	ribulose-1.5-bisphosphate carboxylase/oxygenase large subunit, partial (chloroplast) [Rhipsalis neves-armondii f. neves-armondii]	181	49560	6	5	4	4	177	1	0	0	1467.59	1466.59	1	1466.61	-0.0243	193	204	0	65.15	0.0069	K	DDENVNSQPFMR	W	Oxidation (M)	0.000000000010.0		8e07f201-6520-4ce6-8f0b-2a0050986e61
1		gi|338795975	ribulose-1.5-bisphosphate carboxylase/oxygenase large subunit, partial (chloroplast) [Rhipsalis neves-armondii f. neves-armondii]	181	49560	6	5	4	4	178	1	0	0	1467.62	1466.62	1	1466.61	0.006	193	204	0	48.28	0.043	K	DDENVNSQPFMR	W	Oxidation (M)	0.000000000010.0		ad1d5914-626a-4824-8118-2641481df83c
1		gi|338795975	ribulose-1.5-bisphosphate carboxylase/oxygenase large subunit, partial (chloroplast) [Rhipsalis neves-armondii f. neves-armondii]	181	49560	6	5	4	4	249	1	0	0	1810.88	1809.88	1	1809.8	0.0726	228	243	0	92.55	2.1e-05	K	GHYLNATAGTCEEMIK	R	Oxidation (M)	0.0000000000000100.0		cf4f86cf-da03-466e-86ba-b861b6db9e02
1		gi|1050449	ribulose-1,5-bisphosphate carboxylase [Cubanola domingensis]	181	52258	6	5	4	4	70	1	0	0	1021.58	1020.58	1	1020.52	0.0536	24	32	0	77.84	0.00083	K	DTDILAAFR	V				84d29dc6-368b-4900-bd77-c856650145f7
1		gi|1050449	ribulose-1,5-bisphosphate carboxylase [Cubanola domingensis]	181	52258	6	5	4	4	117	2	0	0	1261.75	1260.74	1	1260.71	0.0344	331	341	0	101.85	2.6e-06	R	DITLGFVDLLR	D				aa688366-6c2a-4175-bf1c-50be13a24142
1		gi|1050449	ribulose-1,5-bisphosphate carboxylase [Cubanola domingensis]	181	52258	6	5	4	4	169	1	0	0	1451.6	1450.59	1	1450.61	-0.0268	193	204	0	93.29	1.2e-05	K	DDENVNSQPFMR	W				9add7bb2-334b-4be0-a06a-12b9ae6262a5
1		gi|1050449	ribulose-1,5-bisphosphate carboxylase [Cubanola domingensis]	181	52258	6	5	4	4	177	1	0	0	1467.59	1466.59	1	1466.61	-0.0243	193	204	0	65.15	0.0069	K	DDENVNSQPFMR	W	Oxidation (M)	0.000000000010.0		8e07f201-6520-4ce6-8f0b-2a0050986e61
1		gi|1050449	ribulose-1,5-bisphosphate carboxylase [Cubanola domingensis]	181	52258	6	5	4	4	178	1	0	0	1467.62	1466.62	1	1466.61	0.006	193	204	0	48.28	0.043	K	DDENVNSQPFMR	W	Oxidation (M)	0.000000000010.0		ad1d5914-626a-4824-8118-2641481df83c
1		gi|1050449	ribulose-1,5-bisphosphate carboxylase [Cubanola domingensis]	181	52258	6	5	4	4	202	1	0	0	1546.77	1545.76	1	1545.73	0.0348	442	454	0	91.76	3e-05	K	WSPELAAACEVWK	E				94157d68-1ffb-41d7-be86-fa11548b3061
1		gi|12004187	ribulose-1,5-bisphosphate carboxylase/oxygenase large subunit [Primula gaubaeana]	180	52314	7	6	5	5	116	5	0	0	1261.66	1260.65	1	1260.62	0.0335	211	220	0	75.01	0.0017	R	FLFCAEAIYK	A				208f2f60-1cbb-4e5b-ba4a-a0138d994a65
1		gi|12004187	ribulose-1,5-bisphosphate carboxylase/oxygenase large subunit [Primula gaubaeana]	180	52314	7	6	5	5	169	1	0	0	1451.6	1450.59	1	1450.61	-0.0268	195	206	0	93.29	1.2e-05	K	DDENVNSQPFMR	W				9add7bb2-334b-4be0-a06a-12b9ae6262a5
1		gi|12004187	ribulose-1,5-bisphosphate carboxylase/oxygenase large subunit [Primula gaubaeana]	180	52314	7	6	5	5	177	1	0	0	1467.59	1466.59	1	1466.61	-0.0243	195	206	0	65.15	0.0069	K	DDENVNSQPFMR	W	Oxidation (M)	0.000000000010.0		8e07f201-6520-4ce6-8f0b-2a0050986e61
1		gi|12004187	ribulose-1,5-bisphosphate carboxylase/oxygenase large subunit [Primula gaubaeana]	180	52314	7	6	5	5	178	1	0	0	1467.62	1466.62	1	1466.61	0.006	195	206	0	48.28	0.043	K	DDENVNSQPFMR	W	Oxidation (M)	0.000000000010.0		ad1d5914-626a-4824-8118-2641481df83c
1		gi|12004187	ribulose-1,5-bisphosphate carboxylase/oxygenase large subunit [Primula gaubaeana]	180	52314	7	6	5	5	190	1	0	0	1497.7	1496.69	1	1496.7	-0.0151	313	327	0	71.08	0.0016	R	MSGGDHIHSGTVVGK	L	Oxidation (M)	0.100000000000000.0		3010fe4d-82cd-4323-934a-cbbcc31a34ee
1		gi|12004187	ribulose-1,5-bisphosphate carboxylase/oxygenase large subunit [Primula gaubaeana]	180	52314	7	6	5	5	202	1	0	0	1546.77	1545.76	1	1545.73	0.0348	444	456	0	91.76	3e-05	K	WSPELAAACEVWK	E				94157d68-1ffb-41d7-be86-fa11548b3061
1		gi|12004187	ribulose-1,5-bisphosphate carboxylase/oxygenase large subunit [Primula gaubaeana]	180	52314	7	6	5	5	249	1	0	0	1810.88	1809.88	1	1809.8	0.0726	230	245	0	92.55	2.1e-05	K	GHYLNATAGTCEEMIK	R	Oxidation (M)	0.0000000000000100.0		cf4f86cf-da03-466e-86ba-b861b6db9e02
1		gi|108951012	ribulose-1,5-bisphosphate carboxylase/oxygenase large subunit [Echinopepon arachoideus]	179	43524	6	5	4	4	116	5	0	0	1261.66	1260.65	1	1260.62	0.0335	168	177	0	75.01	0.0017	R	FLFCAEAIYK	S				208f2f60-1cbb-4e5b-ba4a-a0138d994a65
1		gi|108951012	ribulose-1,5-bisphosphate carboxylase/oxygenase large subunit [Echinopepon arachoideus]	179	43524	6	5	4	4	117	2	0	0	1261.75	1260.74	1	1260.71	0.0344	290	300	0	101.85	2.6e-06	R	DITLGFVDLLR	D				aa688366-6c2a-4175-bf1c-50be13a24142
1		gi|108951012	ribulose-1,5-bisphosphate carboxylase/oxygenase large subunit [Echinopepon arachoideus]	179	43524	6	5	4	4	169	1	0	0	1451.6	1450.59	1	1450.61	-0.0268	152	163	0	93.29	1.2e-05	K	DDENVNSQPFMR	W				9add7bb2-334b-4be0-a06a-12b9ae6262a5
1		gi|108951012	ribulose-1,5-bisphosphate carboxylase/oxygenase large subunit [Echinopepon arachoideus]	179	43524	6	5	4	4	177	1	0	0	1467.59	1466.59	1	1466.61	-0.0243	152	163	0	65.15	0.0069	K	DDENVNSQPFMR	W	Oxidation (M)	0.000000000010.0		8e07f201-6520-4ce6-8f0b-2a0050986e61
1		gi|108951012	ribulose-1,5-bisphosphate carboxylase/oxygenase large subunit [Echinopepon arachoideus]	179	43524	6	5	4	4	178	1	0	0	1467.62	1466.62	1	1466.61	0.006	152	163	0	48.28	0.043	K	DDENVNSQPFMR	W	Oxidation (M)	0.000000000010.0		ad1d5914-626a-4824-8118-2641481df83c
1		gi|108951012	ribulose-1,5-bisphosphate carboxylase/oxygenase large subunit [Echinopepon arachoideus]	179	43524	6	5	4	4	249	1	0	0	1810.88	1809.88	1	1809.8	0.0726	187	202	0	92.55	2.1e-05	K	GHYLNATAGTCEEMIK	R	Oxidation (M)	0.0000000000000100.0		cf4f86cf-da03-466e-86ba-b861b6db9e02
1		gi|296033262	ribulose-1,5-bisphosphate carboxylase/oxygenase large subunit [Arum byzantinum]	179	53736	5	5	5	5	70	1	0	0	1021.58	1020.58	1	1020.52	0.0536	33	41	0	77.84	0.00083	K	DTDILAAFR	V				84d29dc6-368b-4900-bd77-c856650145f7
1		gi|296033262	ribulose-1,5-bisphosphate carboxylase/oxygenase large subunit [Arum byzantinum]	179	53736	5	5	5	5	115	1	0	1	1257.69	1256.69	1	1256.67	0.014	436	446	1	95.97	1.4e-05	R	DLAKEGNEIIR	E				bcc600e8-1e0b-4157-b229-5a5a2d1d6899
1		gi|296033262	ribulose-1,5-bisphosphate carboxylase/oxygenase large subunit [Arum byzantinum]	179	53736	5	5	5	5	116	5	0	0	1261.66	1260.65	1	1260.62	0.0335	218	227	0	75.01	0.0017	R	FLFCAEAIYK	A				208f2f60-1cbb-4e5b-ba4a-a0138d994a65
1		gi|296033262	ribulose-1,5-bisphosphate carboxylase/oxygenase large subunit [Arum byzantinum]	179	53736	5	5	5	5	202	1	0	0	1546.77	1545.76	1	1545.73	0.0348	451	463	0	91.76	3e-05	K	WSPELAAACEVWK	A				94157d68-1ffb-41d7-be86-fa11548b3061
1		gi|296033262	ribulose-1,5-bisphosphate carboxylase/oxygenase large subunit [Arum byzantinum]	179	53736	5	5	5	5	249	1	0	0	1810.88	1809.88	1	1809.8	0.0726	237	252	0	92.55	2.1e-05	K	GHYLNATAGTCEEMIK	R	Oxidation (M)	0.0000000000000100.0		cf4f86cf-da03-466e-86ba-b861b6db9e02
1		gi|115564963	ribulose 1,5-bisphosphate carboxilase/oxigenase large subunit [Distylium myricoides]	179	51876	7	6	5	5	70	1	0	0	1021.58	1020.58	1	1020.52	0.0536	23	31	0	77.84	0.00083	K	DTDILAAFR	V				84d29dc6-368b-4900-bd77-c856650145f7
1		gi|115564963	ribulose 1,5-bisphosphate carboxilase/oxigenase large subunit [Distylium myricoides]	179	51876	7	6	5	5	169	1	0	0	1451.6	1450.59	1	1450.61	-0.0268	192	203	0	93.29	1.2e-05	K	DDENVNSQPFMR	W				9add7bb2-334b-4be0-a06a-12b9ae6262a5
1		gi|115564963	ribulose 1,5-bisphosphate carboxilase/oxigenase large subunit [Distylium myricoides]	179	51876	7	6	5	5	177	1	0	0	1467.59	1466.59	1	1466.61	-0.0243	192	203	0	65.15	0.0069	K	DDENVNSQPFMR	W	Oxidation (M)	0.000000000010.0		8e07f201-6520-4ce6-8f0b-2a0050986e61
1		gi|115564963	ribulose 1,5-bisphosphate carboxilase/oxigenase large subunit [Distylium myricoides]	179	51876	7	6	5	5	178	1	0	0	1467.62	1466.62	1	1466.61	0.006	192	203	0	48.28	0.043	K	DDENVNSQPFMR	W	Oxidation (M)	0.000000000010.0		ad1d5914-626a-4824-8118-2641481df83c
1		gi|115564963	ribulose 1,5-bisphosphate carboxilase/oxigenase large subunit [Distylium myricoides]	179	51876	7	6	5	5	202	1	0	0	1546.77	1545.76	1	1545.73	0.0348	441	453	0	91.76	3e-05	K	WSPELAAACEVWK	E				94157d68-1ffb-41d7-be86-fa11548b3061
1		gi|115564963	ribulose 1,5-bisphosphate carboxilase/oxigenase large subunit [Distylium myricoides]	179	51876	7	6	5	5	239	1	0	1	1746.83	1745.82	1	1745.81	0.0166	227	242	0	69.69	0.0042	K	GHVLNATAGTCEEMIK	R	Oxidation (M)	0.0000000000000100.0		6ac0cdfc-c186-407c-be7c-aefc1da0d285
1		gi|115564963	ribulose 1,5-bisphosphate carboxilase/oxigenase large subunit [Distylium myricoides]	179	51876	7	6	5	5	249	1	0	1	1810.88	1809.88	1	1809.8	0.0726	227	242	0	92.55	2.1e-05	K	GHYLNATAGTCEEMIK	R	Oxidation (M)	0.0000000000000100.0		cf4f86cf-da03-466e-86ba-b861b6db9e02
1		gi|10764615	ribulose-1,5-biphosphate carboxylase/oxygenase large subunit [Spiraeanthemum samoense]	178	47608	6	5	4	4	117	2	0	0	1261.75	1260.74	1	1260.71	0.0344	313	323	0	101.85	2.6e-06	R	DITLGFVDLLR	D				aa688366-6c2a-4175-bf1c-50be13a24142
1		gi|10764615	ribulose-1,5-biphosphate carboxylase/oxygenase large subunit [Spiraeanthemum samoense]	178	47608	6	5	4	4	169	1	0	0	1451.6	1450.59	1	1450.61	-0.0268	175	186	0	93.29	1.2e-05	K	DDENVNSQPFMR	W				9add7bb2-334b-4be0-a06a-12b9ae6262a5
1		gi|10764615	ribulose-1,5-biphosphate carboxylase/oxygenase large subunit [Spiraeanthemum samoense]	178	47608	6	5	4	4	177	1	0	0	1467.59	1466.59	1	1466.61	-0.0243	175	186	0	65.15	0.0069	K	DDENVNSQPFMR	W	Oxidation (M)	0.000000000010.0		8e07f201-6520-4ce6-8f0b-2a0050986e61
1		gi|10764615	ribulose-1,5-biphosphate carboxylase/oxygenase large subunit [Spiraeanthemum samoense]	178	47608	6	5	4	4	178	1	0	0	1467.62	1466.62	1	1466.61	0.006	175	186	0	48.28	0.043	K	DDENVNSQPFMR	W	Oxidation (M)	0.000000000010.0		ad1d5914-626a-4824-8118-2641481df83c
1		gi|10764615	ribulose-1,5-biphosphate carboxylase/oxygenase large subunit [Spiraeanthemum samoense]	178	47608	6	5	4	4	190	1	0	0	1497.7	1496.69	1	1496.7	-0.0151	293	307	0	71.08	0.0016	R	MSGGDHIHSGTVVGK	L	Oxidation (M)	0.100000000000000.0		3010fe4d-82cd-4323-934a-cbbcc31a34ee
1		gi|10764615	ribulose-1,5-biphosphate carboxylase/oxygenase large subunit [Spiraeanthemum samoense]	178	47608	6	5	4	4	249	1	0	0	1810.88	1809.88	1	1809.8	0.0726	210	225	0	92.55	2.1e-05	K	GHYLNATAGTCEEMIK	R	Oxidation (M)	0.0000000000000100.0		cf4f86cf-da03-466e-86ba-b861b6db9e02
1		gi|108951030	ribulose-1,5-bisphosphate carboxylase/oxygenase large subunit [Cucurbitella asperata]	178	46296	6	5	4	4	116	5	0	0	1261.66	1260.65	1	1260.62	0.0335	163	172	0	75.01	0.0017	R	FLFCAEAIYK	S				208f2f60-1cbb-4e5b-ba4a-a0138d994a65
1		gi|108951030	ribulose-1,5-bisphosphate carboxylase/oxygenase large subunit [Cucurbitella asperata]	178	46296	6	5	4	4	117	2	0	0	1261.75	1260.74	1	1260.71	0.0344	285	295	0	101.85	2.6e-06	R	DITLGFVDLLR	D				aa688366-6c2a-4175-bf1c-50be13a24142
1		gi|108951030	ribulose-1,5-bisphosphate carboxylase/oxygenase large subunit [Cucurbitella asperata]	178	46296	6	5	4	4	169	1	0	0	1451.6	1450.59	1	1450.61	-0.0268	147	158	0	93.29	1.2e-05	K	DDENVNSQPFMR	W				9add7bb2-334b-4be0-a06a-12b9ae6262a5
1		gi|108951030	ribulose-1,5-bisphosphate carboxylase/oxygenase large subunit [Cucurbitella asperata]	178	46296	6	5	4	4	177	1	0	0	1467.59	1466.59	1	1466.61	-0.0243	147	158	0	65.15	0.0069	K	DDENVNSQPFMR	W	Oxidation (M)	0.000000000010.0		8e07f201-6520-4ce6-8f0b-2a0050986e61
1		gi|108951030	ribulose-1,5-bisphosphate carboxylase/oxygenase large subunit [Cucurbitella asperata]	178	46296	6	5	4	4	178	1	0	0	1467.62	1466.62	1	1466.61	0.006	147	158	0	48.28	0.043	K	DDENVNSQPFMR	W	Oxidation (M)	0.000000000010.0		ad1d5914-626a-4824-8118-2641481df83c
1		gi|108951030	ribulose-1,5-bisphosphate carboxylase/oxygenase large subunit [Cucurbitella asperata]	178	46296	6	5	4	4	202	1	0	0	1546.77	1545.76	1	1545.73	0.0348	396	408	0	91.76	3e-05	K	WSPELAAACEVWK	E				94157d68-1ffb-41d7-be86-fa11548b3061
1		gi|10764617	ribulose-1,5-biphosphate carboxylase/oxygenase large subunit [Brunellia colombiana]	178	51349	6	5	4	4	117	2	0	0	1261.75	1260.74	1	1260.71	0.0344	323	333	0	101.85	2.6e-06	R	DITLGFVDLLR	D				aa688366-6c2a-4175-bf1c-50be13a24142
1		gi|10764617	ribulose-1,5-biphosphate carboxylase/oxygenase large subunit [Brunellia colombiana]	178	51349	6	5	4	4	169	1	0	0	1451.6	1450.59	1	1450.61	-0.0268	185	196	0	93.29	1.2e-05	K	DDENVNSQPFMR	W				9add7bb2-334b-4be0-a06a-12b9ae6262a5
1		gi|10764617	ribulose-1,5-biphosphate carboxylase/oxygenase large subunit [Brunellia colombiana]	178	51349	6	5	4	4	177	1	0	0	1467.59	1466.59	1	1466.61	-0.0243	185	196	0	65.15	0.0069	K	DDENVNSQPFMR	W	Oxidation (M)	0.000000000010.0		8e07f201-6520-4ce6-8f0b-2a0050986e61
1		gi|10764617	ribulose-1,5-biphosphate carboxylase/oxygenase large subunit [Brunellia colombiana]	178	51349	6	5	4	4	178	1	0	0	1467.62	1466.62	1	1466.61	0.006	185	196	0	48.28	0.043	K	DDENVNSQPFMR	W	Oxidation (M)	0.000000000010.0		ad1d5914-626a-4824-8118-2641481df83c
1		gi|10764617	ribulose-1,5-biphosphate carboxylase/oxygenase large subunit [Brunellia colombiana]	178	51349	6	5	4	4	190	1	0	0	1497.7	1496.69	1	1496.7	-0.0151	303	317	0	71.08	0.0016	R	MSGGDHIHSGTVVGK	L	Oxidation (M)	0.100000000000000.0		3010fe4d-82cd-4323-934a-cbbcc31a34ee
1		gi|10764617	ribulose-1,5-biphosphate carboxylase/oxygenase large subunit [Brunellia colombiana]	178	51349	6	5	4	4	202	1	0	0	1546.77	1545.76	1	1545.73	0.0348	434	446	0	91.76	3e-05	K	WSPELAAACEVWK	E				94157d68-1ffb-41d7-be86-fa11548b3061
1		gi|17154548	ribulose-1,5-bisphosphate carboxylase/oxygenase large subunit [Lapeirousia neglecta]	175	49568	6	5	4	4	70	1	0	0	1021.58	1020.58	1	1020.52	0.0536	26	34	0	77.84	0.00083	K	DTDILAAFR	V				84d29dc6-368b-4900-bd77-c856650145f7
1		gi|17154548	ribulose-1,5-bisphosphate carboxylase/oxygenase large subunit [Lapeirousia neglecta]	175	49568	6	5	4	4	115	1	0	1	1257.69	1256.69	1	1256.67	0.014	429	439	1	95.97	1.4e-05	R	DLAKEGNEIIR	E				bcc600e8-1e0b-4157-b229-5a5a2d1d6899
1		gi|17154548	ribulose-1,5-bisphosphate carboxylase/oxygenase large subunit [Lapeirousia neglecta]	175	49568	6	5	4	4	169	1	0	0	1451.6	1450.59	1	1450.61	-0.0268	195	206	0	93.29	1.2e-05	K	DDENVNSQPFMR	W				9add7bb2-334b-4be0-a06a-12b9ae6262a5
1		gi|17154548	ribulose-1,5-bisphosphate carboxylase/oxygenase large subunit [Lapeirousia neglecta]	175	49568	6	5	4	4	177	1	0	0	1467.59	1466.59	1	1466.61	-0.0243	195	206	0	65.15	0.0069	K	DDENVNSQPFMR	W	Oxidation (M)	0.000000000010.0		8e07f201-6520-4ce6-8f0b-2a0050986e61
1		gi|17154548	ribulose-1,5-bisphosphate carboxylase/oxygenase large subunit [Lapeirousia neglecta]	175	49568	6	5	4	4	178	1	0	0	1467.62	1466.62	1	1466.61	0.006	195	206	0	48.28	0.043	K	DDENVNSQPFMR	W	Oxidation (M)	0.000000000010.0		ad1d5914-626a-4824-8118-2641481df83c
1		gi|17154548	ribulose-1,5-bisphosphate carboxylase/oxygenase large subunit [Lapeirousia neglecta]	175	49568	6	5	4	4	249	1	0	0	1810.88	1809.88	1	1809.8	0.0726	230	245	0	92.55	2.1e-05	K	GHYLNATAGTCEEMIK	R	Oxidation (M)	0.0000000000000100.0		cf4f86cf-da03-466e-86ba-b861b6db9e02
1		gi|17863831	ribulose 1,5-biphosphate carboxylase large chain precursor [Lonicera nervosa]	174	53124	6	5	4	4	70	1	0	0	1021.58	1020.58	1	1020.52	0.0536	33	41	0	77.84	0.00083	K	DTDILAAFR	V				84d29dc6-368b-4900-bd77-c856650145f7
1		gi|17863831	ribulose 1,5-biphosphate carboxylase large chain precursor [Lonicera nervosa]	174	53124	6	5	4	4	115	1	0	1	1257.69	1256.69	1	1256.64	0.0503	436	446	0	95.97	1.4e-05	R	DLAQEGNEIIR	E				bcc600e8-1e0b-4157-b229-5a5a2d1d6899
1		gi|17863831	ribulose 1,5-biphosphate carboxylase large chain precursor [Lonicera nervosa]	174	53124	6	5	4	4	169	1	0	0	1451.6	1450.59	1	1450.61	-0.0268	202	213	0	93.29	1.2e-05	K	DDENVNSQPFMR	W				9add7bb2-334b-4be0-a06a-12b9ae6262a5
1		gi|17863831	ribulose 1,5-biphosphate carboxylase large chain precursor [Lonicera nervosa]	174	53124	6	5	4	4	177	1	0	0	1467.59	1466.59	1	1466.61	-0.0243	202	213	0	65.15	0.0069	K	DDENVNSQPFMR	W	Oxidation (M)	0.000000000010.0		8e07f201-6520-4ce6-8f0b-2a0050986e61
1		gi|17863831	ribulose 1,5-biphosphate carboxylase large chain precursor [Lonicera nervosa]	174	53124	6	5	4	4	178	1	0	0	1467.62	1466.62	1	1466.61	0.006	202	213	0	48.28	0.043	K	DDENVNSQPFMR	W	Oxidation (M)	0.000000000010.0		ad1d5914-626a-4824-8118-2641481df83c
1		gi|17863831	ribulose 1,5-biphosphate carboxylase large chain precursor [Lonicera nervosa]	174	53124	6	5	4	4	202	1	0	0	1546.77	1545.76	1	1545.73	0.0348	451	463	0	91.76	3e-05	K	WSPELAAACEVWK	E				94157d68-1ffb-41d7-be86-fa11548b3061
1		gi|1050536	ribulose-1,5-bisphosphate carboxylase [Keetia zanzibarica]	174	52580	4	4	4	4	70	1	0	0	1021.58	1020.58	1	1020.52	0.0536	24	32	0	77.84	0.00083	K	DTDILAAFR	V				84d29dc6-368b-4900-bd77-c856650145f7
1		gi|1050536	ribulose-1,5-bisphosphate carboxylase [Keetia zanzibarica]	174	52580	4	4	4	4	117	2	0	0	1261.75	1260.74	1	1260.71	0.0344	331	341	0	101.85	2.6e-06	R	DITLGFVDLLR	D				aa688366-6c2a-4175-bf1c-50be13a24142
1		gi|1050536	ribulose-1,5-bisphosphate carboxylase [Keetia zanzibarica]	174	52580	4	4	4	4	202	1	0	0	1546.77	1545.76	1	1545.73	0.0348	442	454	0	91.76	3e-05	K	WSPELAAACEVWK	E				94157d68-1ffb-41d7-be86-fa11548b3061
1		gi|1050536	ribulose-1,5-bisphosphate carboxylase [Keetia zanzibarica]	174	52580	4	4	4	4	249	1	0	0	1810.88	1809.88	1	1809.8	0.0726	228	243	0	92.55	2.1e-05	K	GHYLNATAGTCEEMIK	R	Oxidation (M)	0.0000000000000100.0		cf4f86cf-da03-466e-86ba-b861b6db9e02
1		gi|10441746	ribulose-1,5-bisphosphate carboxylase/oxygenase large subunit [Bartsia alpina]	174	49157	7	6	5	5	70	1	0	0	1021.58	1020.58	1	1020.52	0.0536	24	32	0	77.84	0.00083	K	DTDILAAFR	V				84d29dc6-368b-4900-bd77-c856650145f7
1		gi|10441746	ribulose-1,5-bisphosphate carboxylase/oxygenase large subunit [Bartsia alpina]	174	49157	7	6	5	5	116	5	0	0	1261.66	1260.65	1	1260.62	0.0335	209	218	0	75.01	0.0017	R	FLFCAEAIYK	A				208f2f60-1cbb-4e5b-ba4a-a0138d994a65
1		gi|10441746	ribulose-1,5-bisphosphate carboxylase/oxygenase large subunit [Bartsia alpina]	174	49157	7	6	5	5	117	2	0	0	1261.75	1260.74	1	1260.71	0.0344	331	341	0	101.85	2.6e-06	R	DITLGFVDLLR	D				aa688366-6c2a-4175-bf1c-50be13a24142
1		gi|10441746	ribulose-1,5-bisphosphate carboxylase/oxygenase large subunit [Bartsia alpina]	174	49157	7	6	5	5	169	1	0	0	1451.6	1450.59	1	1450.61	-0.0268	193	204	0	93.29	1.2e-05	K	DDENVNSQPFMR	W				9add7bb2-334b-4be0-a06a-12b9ae6262a5
1		gi|10441746	ribulose-1,5-bisphosphate carboxylase/oxygenase large subunit [Bartsia alpina]	174	49157	7	6	5	5	177	1	0	0	1467.59	1466.59	1	1466.61	-0.0243	193	204	0	65.15	0.0069	K	DDENVNSQPFMR	W	Oxidation (M)	0.000000000010.0		8e07f201-6520-4ce6-8f0b-2a0050986e61
1		gi|10441746	ribulose-1,5-bisphosphate carboxylase/oxygenase large subunit [Bartsia alpina]	174	49157	7	6	5	5	178	1	0	0	1467.62	1466.62	1	1466.61	0.006	193	204	0	48.28	0.043	K	DDENVNSQPFMR	W	Oxidation (M)	0.000000000010.0		ad1d5914-626a-4824-8118-2641481df83c
1		gi|10441746	ribulose-1,5-bisphosphate carboxylase/oxygenase large subunit [Bartsia alpina]	174	49157	7	6	5	5	190	1	0	0	1497.7	1496.69	1	1496.7	-0.0151	311	325	0	71.08	0.0016	R	MSGGDHIHSGTVVGK	L	Oxidation (M)	0.100000000000000.0		3010fe4d-82cd-4323-934a-cbbcc31a34ee
1		gi|21634079	ribulose-1,5-bisphosphate carboxylase/oxygenase large subunit [Wilsonia humilis]	172	46496	6	5	4	4	115	1	0	1	1257.69	1256.69	1	1256.64	0.0503	403	413	0	95.97	1.4e-05	R	DLAQEGNEIIR	R				bcc600e8-1e0b-4157-b229-5a5a2d1d6899
1		gi|21634079	ribulose-1,5-bisphosphate carboxylase/oxygenase large subunit [Wilsonia humilis]	172	46496	6	5	4	4	116	5	0	0	1261.66	1260.65	1	1260.62	0.0335	185	194	0	75.01	0.0017	R	FLFCAEAIYK	A				208f2f60-1cbb-4e5b-ba4a-a0138d994a65
1		gi|21634079	ribulose-1,5-bisphosphate carboxylase/oxygenase large subunit [Wilsonia humilis]	172	46496	6	5	4	4	169	1	0	0	1451.6	1450.59	1	1450.61	-0.0268	169	180	0	93.29	1.2e-05	K	DDENVNSQPFMR	W				9add7bb2-334b-4be0-a06a-12b9ae6262a5
1		gi|21634079	ribulose-1,5-bisphosphate carboxylase/oxygenase large subunit [Wilsonia humilis]	172	46496	6	5	4	4	177	1	0	0	1467.59	1466.59	1	1466.61	-0.0243	169	180	0	65.15	0.0069	K	DDENVNSQPFMR	W	Oxidation (M)	0.000000000010.0		8e07f201-6520-4ce6-8f0b-2a0050986e61
1		gi|21634079	ribulose-1,5-bisphosphate carboxylase/oxygenase large subunit [Wilsonia humilis]	172	46496	6	5	4	4	178	1	0	0	1467.62	1466.62	1	1466.61	0.006	169	180	0	48.28	0.043	K	DDENVNSQPFMR	W	Oxidation (M)	0.000000000010.0		ad1d5914-626a-4824-8118-2641481df83c
1		gi|21634079	ribulose-1,5-bisphosphate carboxylase/oxygenase large subunit [Wilsonia humilis]	172	46496	6	5	4	4	249	1	0	0	1810.88	1809.88	1	1809.8	0.0726	204	219	0	92.55	2.1e-05	K	GHYLNATAGTCEEMIK	R	Oxidation (M)	0.0000000000000100.0		cf4f86cf-da03-466e-86ba-b861b6db9e02
1		gi|10048144	ribulose 1,5-bisphosphate carboxylase [Melia dubia]	172	52835	8	5	5	4	70	1	0	0	1021.58	1020.58	1	1020.52	0.0536	27	35	0	77.84	0.00083	K	DTDILAAFR	V				84d29dc6-368b-4900-bd77-c856650145f7
1		gi|10048144	ribulose 1,5-bisphosphate carboxylase [Melia dubia]	172	52835	8	5	5	4	71	1	0	1	1023.46	1022.45	1	1022.47	-0.0173	345	352	1	50.68	0.092	R	DDFVEKDR	S				bffdb68b-84c5-40f5-a550-eb469cc6c48d
1		gi|10048144	ribulose 1,5-bisphosphate carboxylase [Melia dubia]	172	52835	8	5	5	4	72	1	0	1	1023.46	1022.45	1	1022.47	-0.0157	345	352	1	48.87	0.091	R	DDFVEKDR	S				5f44fb3d-87a9-437e-8b6e-907154a5b7b8
1		gi|10048144	ribulose 1,5-bisphosphate carboxylase [Melia dubia]	172	52835	8	5	5	4	169	1	0	0	1451.6	1450.59	1	1450.61	-0.0268	196	207	0	93.29	1.2e-05	K	DDENVNSQPFMR	W				9add7bb2-334b-4be0-a06a-12b9ae6262a5
1		gi|10048144	ribulose 1,5-bisphosphate carboxylase [Melia dubia]	172	52835	8	5	5	4	177	1	0	0	1467.59	1466.59	1	1466.61	-0.0243	196	207	0	65.15	0.0069	K	DDENVNSQPFMR	W	Oxidation (M)	0.000000000010.0		8e07f201-6520-4ce6-8f0b-2a0050986e61
1		gi|10048144	ribulose 1,5-bisphosphate carboxylase [Melia dubia]	172	52835	8	5	5	4	178	1	0	0	1467.62	1466.62	1	1466.61	0.006	196	207	0	48.28	0.043	K	DDENVNSQPFMR	W	Oxidation (M)	0.000000000010.0		ad1d5914-626a-4824-8118-2641481df83c
1		gi|10048144	ribulose 1,5-bisphosphate carboxylase [Melia dubia]	172	52835	8	5	5	4	202	1	0	0	1546.77	1545.76	1	1545.73	0.0348	445	457	0	91.76	3e-05	K	WSPELAAACEVWK	E				94157d68-1ffb-41d7-be86-fa11548b3061
1		gi|10048144	ribulose 1,5-bisphosphate carboxylase [Melia dubia]	172	52835	8	5	5	4	249	1	0	0	1810.88	1809.88	1	1809.8	0.0726	231	246	0	92.55	2.1e-05	K	GHYLNATAGTCEEMIK	R	Oxidation (M)	0.0000000000000100.0		cf4f86cf-da03-466e-86ba-b861b6db9e02
1		gi|21389145	ribulose-1,5-bisphosphate carboxylase/oxygenase large subunit [Dionysia janthina]	171	52460	6	5	4	4	116	1	0	1	1261.66	1260.65	1	1260.62	0.0335	211	220	0	77.06	0.0011	R	FIFCAEAIYK	A				208f2f60-1cbb-4e5b-ba4a-a0138d994a65
1		gi|21389145	ribulose-1,5-bisphosphate carboxylase/oxygenase large subunit [Dionysia janthina]	171	52460	6	5	4	4	169	1	0	0	1451.6	1450.59	1	1450.61	-0.0268	195	206	0	93.29	1.2e-05	K	DDENVNSQPFMR	W				9add7bb2-334b-4be0-a06a-12b9ae6262a5
1		gi|21389145	ribulose-1,5-bisphosphate carboxylase/oxygenase large subunit [Dionysia janthina]	171	52460	6	5	4	4	177	1	0	0	1467.59	1466.59	1	1466.61	-0.0243	195	206	0	65.15	0.0069	K	DDENVNSQPFMR	W	Oxidation (M)	0.000000000010.0		8e07f201-6520-4ce6-8f0b-2a0050986e61
1		gi|21389145	ribulose-1,5-bisphosphate carboxylase/oxygenase large subunit [Dionysia janthina]	171	52460	6	5	4	4	178	1	0	0	1467.62	1466.62	1	1466.61	0.006	195	206	0	48.28	0.043	K	DDENVNSQPFMR	W	Oxidation (M)	0.000000000010.0		ad1d5914-626a-4824-8118-2641481df83c
1		gi|21389145	ribulose-1,5-bisphosphate carboxylase/oxygenase large subunit [Dionysia janthina]	171	52460	6	5	4	4	202	1	0	0	1546.77	1545.76	1	1545.73	0.0348	444	456	0	91.76	3e-05	K	WSPELAAACEVWK	E				94157d68-1ffb-41d7-be86-fa11548b3061
1		gi|21389145	ribulose-1,5-bisphosphate carboxylase/oxygenase large subunit [Dionysia janthina]	171	52460	6	5	4	4	249	1	0	0	1810.88	1809.88	1	1809.8	0.0726	230	245	0	92.55	2.1e-05	K	GHYLNATAGTCEEMIK	R	Oxidation (M)	0.0000000000000100.0		cf4f86cf-da03-466e-86ba-b861b6db9e02
1		gi|25053484	ribulose-1,5-bisphosphate carboxylase [Koenigia forrestii]	170	53013	6	4	5	4	71	1	0	1	1023.46	1022.45	1	1022.47	-0.0173	351	358	1	50.68	0.092	R	DDFVEKDR	S				bffdb68b-84c5-40f5-a550-eb469cc6c48d
1		gi|25053484	ribulose-1,5-bisphosphate carboxylase [Koenigia forrestii]	170	53013	6	4	5	4	72	1	0	1	1023.46	1022.45	1	1022.47	-0.0157	351	358	1	48.87	0.091	R	DDFVEKDR	S				5f44fb3d-87a9-437e-8b6e-907154a5b7b8
1		gi|25053484	ribulose-1,5-bisphosphate carboxylase [Koenigia forrestii]	170	53013	6	4	5	4	117	2	0	0	1261.75	1260.74	1	1260.71	0.0344	340	350	0	101.85	2.6e-06	R	DITLGFVDLLR	D				aa688366-6c2a-4175-bf1c-50be13a24142
1		gi|25053484	ribulose-1,5-bisphosphate carboxylase [Koenigia forrestii]	170	53013	6	4	5	4	190	1	0	0	1497.7	1496.69	1	1496.7	-0.0151	320	334	0	71.08	0.0016	R	MSGGDHIHSGTVVGK	L	Oxidation (M)	0.100000000000000.0		3010fe4d-82cd-4323-934a-cbbcc31a34ee
1		gi|25053484	ribulose-1,5-bisphosphate carboxylase [Koenigia forrestii]	170	53013	6	4	5	4	202	1	0	0	1546.77	1545.76	1	1545.73	0.0348	451	463	0	91.76	3e-05	K	WSPELAAACEVWK	E				94157d68-1ffb-41d7-be86-fa11548b3061
1		gi|25053484	ribulose-1,5-bisphosphate carboxylase [Koenigia forrestii]	170	53013	6	4	5	4	249	1	0	0	1810.88	1809.88	1	1809.8	0.0726	237	252	0	92.55	2.1e-05	K	GHYLNATAGTCEEMIK	R	Oxidation (M)	0.0000000000000100.0		cf4f86cf-da03-466e-86ba-b861b6db9e02
1		gi|306481962	ribulose-1,5-bisphosphate carboxylase/oxygenase large subunit [Solanum sp. SH-2010]	170	45486	5	4	3	3	115	1	0	1	1257.69	1256.69	1	1256.64	0.0503	390	400	0	95.97	1.4e-05	R	DLAQEGNEIIR	E				bcc600e8-1e0b-4157-b229-5a5a2d1d6899
1		gi|306481962	ribulose-1,5-bisphosphate carboxylase/oxygenase large subunit [Solanum sp. SH-2010]	170	45486	5	4	3	3	117	2	0	0	1261.75	1260.74	1	1260.71	0.0344	294	304	0	101.85	2.6e-06	R	DITLGFVDLLR	D				aa688366-6c2a-4175-bf1c-50be13a24142
1		gi|306481962	ribulose-1,5-bisphosphate carboxylase/oxygenase large subunit [Solanum sp. SH-2010]	170	45486	5	4	3	3	169	1	0	0	1451.6	1450.59	1	1450.61	-0.0268	156	167	0	93.29	1.2e-05	K	DDENVNSQPFMR	W				9add7bb2-334b-4be0-a06a-12b9ae6262a5
1		gi|306481962	ribulose-1,5-bisphosphate carboxylase/oxygenase large subunit [Solanum sp. SH-2010]	170	45486	5	4	3	3	177	1	0	0	1467.59	1466.59	1	1466.61	-0.0243	156	167	0	65.15	0.0069	K	DDENVNSQPFMR	W	Oxidation (M)	0.000000000010.0		8e07f201-6520-4ce6-8f0b-2a0050986e61
1		gi|306481962	ribulose-1,5-bisphosphate carboxylase/oxygenase large subunit [Solanum sp. SH-2010]	170	45486	5	4	3	3	178	1	0	0	1467.62	1466.62	1	1466.61	0.006	156	167	0	48.28	0.043	K	DDENVNSQPFMR	W	Oxidation (M)	0.000000000010.0		ad1d5914-626a-4824-8118-2641481df83c
1		gi|7240388	ribulose-1,5-bisphosphate carboxylase/oxygenase large subunit [Nothofagus resinosa]	169	49736	5	5	5	5	70	1	0	0	1021.58	1020.58	1	1020.52	0.0536	23	31	0	77.84	0.00083	K	DTDILAAFR	V				84d29dc6-368b-4900-bd77-c856650145f7
1		gi|7240388	ribulose-1,5-bisphosphate carboxylase/oxygenase large subunit [Nothofagus resinosa]	169	49736	5	5	5	5	116	1	0	1	1261.66	1260.65	1	1260.62	0.0335	208	217	0	77.06	0.0011	R	FIFCAEAIYK	A				208f2f60-1cbb-4e5b-ba4a-a0138d994a65
1		gi|7240388	ribulose-1,5-bisphosphate carboxylase/oxygenase large subunit [Nothofagus resinosa]	169	49736	5	5	5	5	117	2	0	0	1261.75	1260.74	1	1260.71	0.0344	330	340	0	101.85	2.6e-06	R	DITLGFVDLLR	D				aa688366-6c2a-4175-bf1c-50be13a24142
1		gi|7240388	ribulose-1,5-bisphosphate carboxylase/oxygenase large subunit [Nothofagus resinosa]	169	49736	5	5	5	5	190	1	0	0	1497.7	1496.69	1	1496.7	-0.0151	310	324	0	71.08	0.0016	R	MSGGDHIHSGTVVGK	L	Oxidation (M)	0.100000000000000.0		3010fe4d-82cd-4323-934a-cbbcc31a34ee
1		gi|7240388	ribulose-1,5-bisphosphate carboxylase/oxygenase large subunit [Nothofagus resinosa]	169	49736	5	5	5	5	249	1	0	0	1810.88	1809.88	1	1809.8	0.0726	227	242	0	92.55	2.1e-05	K	GHYLNATAGTCEEMIK	R	Oxidation (M)	0.0000000000000100.0		cf4f86cf-da03-466e-86ba-b861b6db9e02
1		gi|10764575	ribulose-1,5-biphosphate carboxylase/oxygenase large subunit [Weinmannia madagascariensis]	169	48081	6	5	4	4	116	5	0	0	1261.66	1260.65	1	1260.62	0.0335	185	194	0	75.01	0.0017	R	FLFCAEAIYK	A				208f2f60-1cbb-4e5b-ba4a-a0138d994a65
1		gi|10764575	ribulose-1,5-biphosphate carboxylase/oxygenase large subunit [Weinmannia madagascariensis]	169	48081	6	5	4	4	169	1	0	0	1451.6	1450.59	1	1450.61	-0.0268	169	180	0	93.29	1.2e-05	K	DDENVNSQPFMR	W				9add7bb2-334b-4be0-a06a-12b9ae6262a5
1		gi|10764575	ribulose-1,5-biphosphate carboxylase/oxygenase large subunit [Weinmannia madagascariensis]	169	48081	6	5	4	4	177	1	0	0	1467.59	1466.59	1	1466.61	-0.0243	169	180	0	65.15	0.0069	K	DDENVNSQPFMR	W	Oxidation (M)	0.000000000010.0		8e07f201-6520-4ce6-8f0b-2a0050986e61
1		gi|10764575	ribulose-1,5-biphosphate carboxylase/oxygenase large subunit [Weinmannia madagascariensis]	169	48081	6	5	4	4	178	1	0	0	1467.62	1466.62	1	1466.61	0.006	169	180	0	48.28	0.043	K	DDENVNSQPFMR	W	Oxidation (M)	0.000000000010.0		ad1d5914-626a-4824-8118-2641481df83c
1		gi|10764575	ribulose-1,5-biphosphate carboxylase/oxygenase large subunit [Weinmannia madagascariensis]	169	48081	6	5	4	4	202	1	0	0	1546.77	1545.76	1	1545.73	0.0348	418	430	0	91.76	3e-05	K	WSPELAAACEVWK	E				94157d68-1ffb-41d7-be86-fa11548b3061
1		gi|10764575	ribulose-1,5-biphosphate carboxylase/oxygenase large subunit [Weinmannia madagascariensis]	169	48081	6	5	4	4	249	1	0	0	1810.88	1809.88	1	1809.8	0.0726	204	219	0	92.55	2.1e-05	K	GHYLNATAGTCEEMIK	R	Oxidation (M)	0.0000000000000100.0		cf4f86cf-da03-466e-86ba-b861b6db9e02
1		gi|10764603	ribulose-1,5-biphosphate carboxylase/oxygenase large subunit [Pullea glabra]	168	50447	6	5	4	4	169	1	0	0	1451.6	1450.59	1	1450.61	-0.0268	179	190	0	93.29	1.2e-05	K	DDENVNSQPFMR	W				9add7bb2-334b-4be0-a06a-12b9ae6262a5
1		gi|10764603	ribulose-1,5-biphosphate carboxylase/oxygenase large subunit [Pullea glabra]	168	50447	6	5	4	4	177	1	0	0	1467.59	1466.59	1	1466.61	-0.0243	179	190	0	65.15	0.0069	K	DDENVNSQPFMR	W	Oxidation (M)	0.000000000010.0		8e07f201-6520-4ce6-8f0b-2a0050986e61
1		gi|10764603	ribulose-1,5-biphosphate carboxylase/oxygenase large subunit [Pullea glabra]	168	50447	6	5	4	4	178	1	0	0	1467.62	1466.62	1	1466.61	0.006	179	190	0	48.28	0.043	K	DDENVNSQPFMR	W	Oxidation (M)	0.000000000010.0		ad1d5914-626a-4824-8118-2641481df83c
1		gi|10764603	ribulose-1,5-biphosphate carboxylase/oxygenase large subunit [Pullea glabra]	168	50447	6	5	4	4	190	1	0	0	1497.7	1496.69	1	1496.7	-0.0151	297	311	0	71.08	0.0016	R	MSGGDHIHSGTVVGK	L	Oxidation (M)	0.100000000000000.0		3010fe4d-82cd-4323-934a-cbbcc31a34ee
1		gi|10764603	ribulose-1,5-biphosphate carboxylase/oxygenase large subunit [Pullea glabra]	168	50447	6	5	4	4	202	1	0	0	1546.77	1545.76	1	1545.73	0.0348	428	440	0	91.76	3e-05	K	WSPELAAACEVWK	E				94157d68-1ffb-41d7-be86-fa11548b3061
1		gi|10764603	ribulose-1,5-biphosphate carboxylase/oxygenase large subunit [Pullea glabra]	168	50447	6	5	4	4	249	1	0	0	1810.88	1809.88	1	1809.8	0.0726	214	229	0	92.55	2.1e-05	K	GHYLNATAGTCEEMIK	R	Oxidation (M)	0.0000000000000100.0		cf4f86cf-da03-466e-86ba-b861b6db9e02
1		gi|10048138	ribulose 1,5-bisphosphate carboxylase [Flindersia australis]	168	50745	7	4	4	3	71	1	0	1	1023.46	1022.45	1	1022.47	-0.0173	339	346	1	50.68	0.092	R	DDFVEKDR	S				bffdb68b-84c5-40f5-a550-eb469cc6c48d
1		gi|10048138	ribulose 1,5-bisphosphate carboxylase [Flindersia australis]	168	50745	7	4	4	3	72	1	0	1	1023.46	1022.45	1	1022.47	-0.0157	339	346	1	48.87	0.091	R	DDFVEKDR	S				5f44fb3d-87a9-437e-8b6e-907154a5b7b8
1		gi|10048138	ribulose 1,5-bisphosphate carboxylase [Flindersia australis]	168	50745	7	4	4	3	117	2	0	0	1261.75	1260.74	1	1260.71	0.0344	328	338	0	101.85	2.6e-06	R	DITLGFVDLLR	D				aa688366-6c2a-4175-bf1c-50be13a24142
1		gi|10048138	ribulose 1,5-bisphosphate carboxylase [Flindersia australis]	168	50745	7	4	4	3	169	1	0	0	1451.6	1450.59	1	1450.61	-0.0268	190	201	0	93.29	1.2e-05	K	DDENVNSQPFMR	W				9add7bb2-334b-4be0-a06a-12b9ae6262a5
1		gi|10048138	ribulose 1,5-bisphosphate carboxylase [Flindersia australis]	168	50745	7	4	4	3	177	1	0	0	1467.59	1466.59	1	1466.61	-0.0243	190	201	0	65.15	0.0069	K	DDENVNSQPFMR	W	Oxidation (M)	0.000000000010.0		8e07f201-6520-4ce6-8f0b-2a0050986e61
1		gi|10048138	ribulose 1,5-bisphosphate carboxylase [Flindersia australis]	168	50745	7	4	4	3	178	1	0	0	1467.62	1466.62	1	1466.61	0.006	190	201	0	48.28	0.043	K	DDENVNSQPFMR	W	Oxidation (M)	0.000000000010.0		ad1d5914-626a-4824-8118-2641481df83c
1		gi|10048138	ribulose 1,5-bisphosphate carboxylase [Flindersia australis]	168	50745	7	4	4	3	249	1	0	0	1810.88	1809.88	1	1809.8	0.0726	225	240	0	92.55	2.1e-05	K	GHYLNATAGTCEEMIK	R	Oxidation (M)	0.0000000000000100.0		cf4f86cf-da03-466e-86ba-b861b6db9e02
1		gi|1332431	ribulose-biphosphate carboxylase large subunit [Asphodeline lutea]	168	49998	7	6	5	5	70	1	0	0	1021.58	1020.58	1	1020.52	0.0536	24	32	0	77.84	0.00083	K	DTDILAAFR	V				84d29dc6-368b-4900-bd77-c856650145f7
1		gi|1332431	ribulose-biphosphate carboxylase large subunit [Asphodeline lutea]	168	49998	7	6	5	5	115	1	0	1	1257.69	1256.69	1	1256.64	0.0503	427	437	0	95.97	1.4e-05	R	DLAQEGNEIIR	E				bcc600e8-1e0b-4157-b229-5a5a2d1d6899
1		gi|1332431	ribulose-biphosphate carboxylase large subunit [Asphodeline lutea]	168	49998	7	6	5	5	116	5	0	0	1261.66	1260.65	1	1260.62	0.0335	209	218	0	75.01	0.0017	R	FLFCAEAIYK	A				208f2f60-1cbb-4e5b-ba4a-a0138d994a65
1		gi|1332431	ribulose-biphosphate carboxylase large subunit [Asphodeline lutea]	168	49998	7	6	5	5	169	1	0	0	1451.6	1450.59	1	1450.61	-0.0268	193	204	0	93.29	1.2e-05	K	DDENVNSQPFMR	W				9add7bb2-334b-4be0-a06a-12b9ae6262a5
1		gi|1332431	ribulose-biphosphate carboxylase large subunit [Asphodeline lutea]	168	49998	7	6	5	5	177	1	0	0	1467.59	1466.59	1	1466.61	-0.0243	193	204	0	65.15	0.0069	K	DDENVNSQPFMR	W	Oxidation (M)	0.000000000010.0		8e07f201-6520-4ce6-8f0b-2a0050986e61
1		gi|1332431	ribulose-biphosphate carboxylase large subunit [Asphodeline lutea]	168	49998	7	6	5	5	178	1	0	0	1467.62	1466.62	1	1466.61	0.006	193	204	0	48.28	0.043	K	DDENVNSQPFMR	W	Oxidation (M)	0.000000000010.0		ad1d5914-626a-4824-8118-2641481df83c
1		gi|1332431	ribulose-biphosphate carboxylase large subunit [Asphodeline lutea]	168	49998	7	6	5	5	190	1	0	0	1497.7	1496.69	1	1496.7	-0.0151	311	325	0	71.08	0.0016	R	MSGGDHIHSGTVVGK	L	Oxidation (M)	0.100000000000000.0		3010fe4d-82cd-4323-934a-cbbcc31a34ee
1		gi|1050723	ribulose-1,5-bisphosphate carboxylase [Nauclea orientalis]	167	52437	5	4	3	3	117	2	0	0	1261.75	1260.74	1	1260.71	0.0344	331	341	0	101.85	2.6e-06	R	DITLGFVDLLR	D				aa688366-6c2a-4175-bf1c-50be13a24142
1		gi|1050723	ribulose-1,5-bisphosphate carboxylase [Nauclea orientalis]	167	52437	5	4	3	3	169	1	0	0	1451.6	1450.59	1	1450.61	-0.0268	193	204	0	93.29	1.2e-05	K	DDENVNSQPFMR	W				9add7bb2-334b-4be0-a06a-12b9ae6262a5
1		gi|1050723	ribulose-1,5-bisphosphate carboxylase [Nauclea orientalis]	167	52437	5	4	3	3	177	1	0	0	1467.59	1466.59	1	1466.61	-0.0243	193	204	0	65.15	0.0069	K	DDENVNSQPFMR	W	Oxidation (M)	0.000000000010.0		8e07f201-6520-4ce6-8f0b-2a0050986e61
1		gi|1050723	ribulose-1,5-bisphosphate carboxylase [Nauclea orientalis]	167	52437	5	4	3	3	178	1	0	0	1467.62	1466.62	1	1466.61	0.006	193	204	0	48.28	0.043	K	DDENVNSQPFMR	W	Oxidation (M)	0.000000000010.0		ad1d5914-626a-4824-8118-2641481df83c
1		gi|1050723	ribulose-1,5-bisphosphate carboxylase [Nauclea orientalis]	167	52437	5	4	3	3	202	1	0	0	1546.77	1545.76	1	1545.73	0.0348	442	454	0	91.76	3e-05	K	WSPELAAACEVWK	E				94157d68-1ffb-41d7-be86-fa11548b3061
1		gi|112408814	ribulose-1,5-bisphosphate carboxylase/oxygenase large subunit [Chaunochiton kappleri]	166	51075	5	5	5	5	70	1	0	0	1021.58	1020.58	1	1020.52	0.0536	13	21	0	77.84	0.00083	K	DTDILAAFR	V				84d29dc6-368b-4900-bd77-c856650145f7
1		gi|112408814	ribulose-1,5-bisphosphate carboxylase/oxygenase large subunit [Chaunochiton kappleri]	166	51075	5	5	5	5	116	5	0	0	1261.66	1260.65	1	1260.62	0.0335	198	207	0	75.01	0.0017	R	FLFCAEAIYK	A				208f2f60-1cbb-4e5b-ba4a-a0138d994a65
1		gi|112408814	ribulose-1,5-bisphosphate carboxylase/oxygenase large subunit [Chaunochiton kappleri]	166	51075	5	5	5	5	117	2	0	0	1261.75	1260.74	1	1260.71	0.0344	320	330	0	101.85	2.6e-06	R	DITLGFVDLLR	D				aa688366-6c2a-4175-bf1c-50be13a24142
1		gi|112408814	ribulose-1,5-bisphosphate carboxylase/oxygenase large subunit [Chaunochiton kappleri]	166	51075	5	5	5	5	190	1	0	0	1497.7	1496.69	1	1496.7	-0.0151	300	314	0	71.08	0.0016	R	MSGGDHIHSGTVVGK	L	Oxidation (M)	0.100000000000000.0		3010fe4d-82cd-4323-934a-cbbcc31a34ee
1		gi|112408814	ribulose-1,5-bisphosphate carboxylase/oxygenase large subunit [Chaunochiton kappleri]	166	51075	5	5	5	5	202	1	0	0	1546.77	1545.76	1	1545.73	0.0348	431	443	0	91.76	3e-05	K	WSPELAAACEVWK	E				94157d68-1ffb-41d7-be86-fa11548b3061
1		gi|1332531	ribulose-biphosphate carboxylase large subunit [Kniphofia uvaria]	166	52157	7	6	5	5	70	1	0	0	1021.58	1020.58	1	1020.52	0.0536	23	31	0	77.84	0.00083	K	DTDILAAFR	V				84d29dc6-368b-4900-bd77-c856650145f7
1		gi|1332531	ribulose-biphosphate carboxylase large subunit [Kniphofia uvaria]	166	52157	7	6	5	5	116	1	0	1	1261.66	1260.65	1	1260.62	0.0335	208	217	0	77.06	0.0011	R	FIFCAEAIYK	A				208f2f60-1cbb-4e5b-ba4a-a0138d994a65
1		gi|1332531	ribulose-biphosphate carboxylase large subunit [Kniphofia uvaria]	166	52157	7	6	5	5	169	1	0	0	1451.6	1450.59	1	1450.61	-0.0268	192	203	0	93.29	1.2e-05	K	DDENVNSQPFMR	W				9add7bb2-334b-4be0-a06a-12b9ae6262a5
1		gi|1332531	ribulose-biphosphate carboxylase large subunit [Kniphofia uvaria]	166	52157	7	6	5	5	177	1	0	0	1467.59	1466.59	1	1466.61	-0.0243	192	203	0	65.15	0.0069	K	DDENVNSQPFMR	W	Oxidation (M)	0.000000000010.0		8e07f201-6520-4ce6-8f0b-2a0050986e61
1		gi|1332531	ribulose-biphosphate carboxylase large subunit [Kniphofia uvaria]	166	52157	7	6	5	5	178	1	0	0	1467.62	1466.62	1	1466.61	0.006	192	203	0	48.28	0.043	K	DDENVNSQPFMR	W	Oxidation (M)	0.000000000010.0		ad1d5914-626a-4824-8118-2641481df83c
1		gi|1332531	ribulose-biphosphate carboxylase large subunit [Kniphofia uvaria]	166	52157	7	6	5	5	190	1	0	0	1497.7	1496.69	1	1496.7	-0.0151	310	324	0	71.08	0.0016	R	MSGGDHIHSGTVVGK	L	Oxidation (M)	0.100000000000000.0		3010fe4d-82cd-4323-934a-cbbcc31a34ee
1		gi|1332531	ribulose-biphosphate carboxylase large subunit [Kniphofia uvaria]	166	52157	7	6	5	5	202	1	0	0	1546.77	1545.76	1	1545.73	0.0348	441	453	0	91.76	3e-05	K	WSPELAAACEVWK	A				94157d68-1ffb-41d7-be86-fa11548b3061
1		gi|11230410	ribulose-1,5-bisphosphate carboxylase/oxygenase large subunit [Duroia hirsuta]	166	43419	6	5	4	4	70	1	0	0	1021.58	1020.58	1	1020.52	0.0536	24	32	0	77.84	0.00083	K	DTDILAAFR	V				84d29dc6-368b-4900-bd77-c856650145f7
1		gi|11230410	ribulose-1,5-bisphosphate carboxylase/oxygenase large subunit [Duroia hirsuta]	166	43419	6	5	4	4	116	1	0	1	1261.66	1260.65	1	1260.62	0.0335	209	218	0	77.06	0.0011	R	FIFCAEALYK	A				208f2f60-1cbb-4e5b-ba4a-a0138d994a65
1		gi|11230410	ribulose-1,5-bisphosphate carboxylase/oxygenase large subunit [Duroia hirsuta]	166	43419	6	5	4	4	117	2	0	0	1261.75	1260.74	1	1260.71	0.0344	331	341	0	101.85	2.6e-06	R	DITLGFVDLLR	D				aa688366-6c2a-4175-bf1c-50be13a24142
1		gi|11230410	ribulose-1,5-bisphosphate carboxylase/oxygenase large subunit [Duroia hirsuta]	166	43419	6	5	4	4	169	1	0	0	1451.6	1450.59	1	1450.61	-0.0268	193	204	0	93.29	1.2e-05	K	DDENVNSQPFMR	W				9add7bb2-334b-4be0-a06a-12b9ae6262a5
1		gi|11230410	ribulose-1,5-bisphosphate carboxylase/oxygenase large subunit [Duroia hirsuta]	166	43419	6	5	4	4	177	1	0	0	1467.59	1466.59	1	1466.61	-0.0243	193	204	0	65.15	0.0069	K	DDENVNSQPFMR	W	Oxidation (M)	0.000000000010.0		8e07f201-6520-4ce6-8f0b-2a0050986e61
1		gi|11230410	ribulose-1,5-bisphosphate carboxylase/oxygenase large subunit [Duroia hirsuta]	166	43419	6	5	4	4	178	1	0	0	1467.62	1466.62	1	1466.61	0.006	193	204	0	48.28	0.043	K	DDENVNSQPFMR	W	Oxidation (M)	0.000000000010.0		ad1d5914-626a-4824-8118-2641481df83c
1		gi|912510	ribulose-1,5-bisphosphate carboxylase/oxygenase large subunit [Marrubium vulgare]	165	52162	5	5	5	5	70	1	0	0	1021.58	1020.58	1	1020.52	0.0536	24	32	0	77.84	0.00083	K	DTDILAAFR	V				84d29dc6-368b-4900-bd77-c856650145f7
1		gi|912510	ribulose-1,5-bisphosphate carboxylase/oxygenase large subunit [Marrubium vulgare]	165	52162	5	5	5	5	116	5	0	0	1261.66	1260.65	1	1260.62	0.0335	209	218	0	75.01	0.0017	R	FLFCAEAIYK	S				208f2f60-1cbb-4e5b-ba4a-a0138d994a65
1		gi|912510	ribulose-1,5-bisphosphate carboxylase/oxygenase large subunit [Marrubium vulgare]	165	52162	5	5	5	5	144	1	0	1	1315.73	1314.72	1	1314.7	0.0272	108	119	0	61.79	9.4e-05	K	FTSIVGNVFGFK	A				014fece4-4058-40a5-9ee9-4e58a2907960
1		gi|912510	ribulose-1,5-bisphosphate carboxylase/oxygenase large subunit [Marrubium vulgare]	165	52162	5	5	5	5	202	1	0	0	1546.77	1545.76	1	1545.73	0.0348	442	454	0	91.76	3e-05	K	WSPELAAACEVWK	E				94157d68-1ffb-41d7-be86-fa11548b3061
1		gi|912510	ribulose-1,5-bisphosphate carboxylase/oxygenase large subunit [Marrubium vulgare]	165	52162	5	5	5	5	249	1	0	0	1810.88	1809.88	1	1809.8	0.0726	228	243	0	92.55	2.1e-05	K	GHYLNATAGTCEEMIK	R	Oxidation (M)	0.0000000000000100.0		cf4f86cf-da03-466e-86ba-b861b6db9e02
1		gi|1045644	ribulose-1,5-bisphosphate carboxylase/oxygenase large subunit, partial (chloroplast) [Orothamnus zeyheri]	165	49876	7	6	5	5	70	1	0	0	1021.58	1020.58	1	1020.52	0.0536	23	31	0	77.84	0.00083	K	DTDILAAFR	V				84d29dc6-368b-4900-bd77-c856650145f7
1		gi|1045644	ribulose-1,5-bisphosphate carboxylase/oxygenase large subunit, partial (chloroplast) [Orothamnus zeyheri]	165	49876	7	6	5	5	116	5	0	0	1261.66	1260.65	1	1260.62	0.0335	208	217	0	75.01	0.0017	R	FLFCAEAIYK	A				208f2f60-1cbb-4e5b-ba4a-a0138d994a65
1		gi|1045644	ribulose-1,5-bisphosphate carboxylase/oxygenase large subunit, partial (chloroplast) [Orothamnus zeyheri]	165	49876	7	6	5	5	169	1	0	0	1451.6	1450.59	1	1450.61	-0.0268	192	203	0	93.29	1.2e-05	K	DDENVNSQPFMR	W				9add7bb2-334b-4be0-a06a-12b9ae6262a5
1		gi|1045644	ribulose-1,5-bisphosphate carboxylase/oxygenase large subunit, partial (chloroplast) [Orothamnus zeyheri]	165	49876	7	6	5	5	177	1	0	0	1467.59	1466.59	1	1466.61	-0.0243	192	203	0	65.15	0.0069	K	DDENVNSQPFMR	W	Oxidation (M)	0.000000000010.0		8e07f201-6520-4ce6-8f0b-2a0050986e61
1		gi|1045644	ribulose-1,5-bisphosphate carboxylase/oxygenase large subunit, partial (chloroplast) [Orothamnus zeyheri]	165	49876	7	6	5	5	178	1	0	0	1467.62	1466.62	1	1466.61	0.006	192	203	0	48.28	0.043	K	DDENVNSQPFMR	W	Oxidation (M)	0.000000000010.0		ad1d5914-626a-4824-8118-2641481df83c
1		gi|1045644	ribulose-1,5-bisphosphate carboxylase/oxygenase large subunit, partial (chloroplast) [Orothamnus zeyheri]	165	49876	7	6	5	5	190	1	0	0	1497.7	1496.69	1	1496.7	-0.0151	310	324	0	71.08	0.0016	R	MSGGDHIHSGTVVGK	L	Oxidation (M)	0.100000000000000.0		3010fe4d-82cd-4323-934a-cbbcc31a34ee
1		gi|1045644	ribulose-1,5-bisphosphate carboxylase/oxygenase large subunit, partial (chloroplast) [Orothamnus zeyheri]	165	49876	7	6	5	5	249	1	0	0	1810.88	1809.88	1	1809.8	0.0726	227	242	0	92.55	2.1e-05	K	GHYLNATAGTCEEMIK	R	Oxidation (M)	0.0000000000000100.0		cf4f86cf-da03-466e-86ba-b861b6db9e02
1		gi|11323517	ribulose-1,5-bisphosphate carboxylase/oxygenase large subunit, partial (chloroplast) [Oreobolus obtusangulus]	164	52191	7	6	5	5	70	1	0	0	1021.58	1020.58	1	1020.52	0.0536	24	32	0	77.84	0.00083	K	DTDILAAFR	V				84d29dc6-368b-4900-bd77-c856650145f7
1		gi|11323517	ribulose-1,5-bisphosphate carboxylase/oxygenase large subunit, partial (chloroplast) [Oreobolus obtusangulus]	164	52191	7	6	5	5	116	5	0	0	1261.66	1260.65	1	1260.62	0.0335	209	218	0	75.01	0.0017	R	FLFCAEAIYK	S				208f2f60-1cbb-4e5b-ba4a-a0138d994a65
1		gi|11323517	ribulose-1,5-bisphosphate carboxylase/oxygenase large subunit, partial (chloroplast) [Oreobolus obtusangulus]	164	52191	7	6	5	5	169	1	0	0	1451.6	1450.59	1	1450.61	-0.0268	193	204	0	93.29	1.2e-05	K	DDENVNSQPFMR	W				9add7bb2-334b-4be0-a06a-12b9ae6262a5
1		gi|11323517	ribulose-1,5-bisphosphate carboxylase/oxygenase large subunit, partial (chloroplast) [Oreobolus obtusangulus]	164	52191	7	6	5	5	177	1	0	0	1467.59	1466.59	1	1466.61	-0.0243	193	204	0	65.15	0.0069	K	DDENVNSQPFMR	W	Oxidation (M)	0.000000000010.0		8e07f201-6520-4ce6-8f0b-2a0050986e61
1		gi|11323517	ribulose-1,5-bisphosphate carboxylase/oxygenase large subunit, partial (chloroplast) [Oreobolus obtusangulus]	164	52191	7	6	5	5	178	1	0	0	1467.62	1466.62	1	1466.61	0.006	193	204	0	48.28	0.043	K	DDENVNSQPFMR	W	Oxidation (M)	0.000000000010.0		ad1d5914-626a-4824-8118-2641481df83c
1		gi|11323517	ribulose-1,5-bisphosphate carboxylase/oxygenase large subunit, partial (chloroplast) [Oreobolus obtusangulus]	164	52191	7	6	5	5	190	1	0	0	1497.7	1496.69	1	1496.7	-0.0151	311	325	0	71.08	0.0016	R	MSGGDHIHSGTVVGK	L	Oxidation (M)	0.100000000000000.0		3010fe4d-82cd-4323-934a-cbbcc31a34ee
1		gi|11323517	ribulose-1,5-bisphosphate carboxylase/oxygenase large subunit, partial (chloroplast) [Oreobolus obtusangulus]	164	52191	7	6	5	5	202	1	0	0	1546.77	1545.76	1	1545.73	0.0348	442	454	0	91.76	3e-05	K	WSPELAAACEVWK	A				94157d68-1ffb-41d7-be86-fa11548b3061
1		gi|22003610	ribulose-1,5-bisphosphate carboxylase/oxygenase large subunit, partial [Kayea stylosa]	164	50408	7	6	5	5	70	1	0	0	1021.58	1020.58	1	1020.52	0.0536	26	34	0	77.84	0.00083	K	DTDILAAFR	V				84d29dc6-368b-4900-bd77-c856650145f7
1		gi|22003610	ribulose-1,5-bisphosphate carboxylase/oxygenase large subunit, partial [Kayea stylosa]	164	50408	7	6	5	5	115	7	0	1	1257.69	1256.69	1	1256.68	0.0027	429	439	1	73.09	0.0027	R	DLARTGNEIIR	E				bcc600e8-1e0b-4157-b229-5a5a2d1d6899
1		gi|22003610	ribulose-1,5-bisphosphate carboxylase/oxygenase large subunit, partial [Kayea stylosa]	164	50408	7	6	5	5	116	5	0	0	1261.66	1260.65	1	1260.62	0.0335	211	220	0	75.01	0.0017	R	FLFCAEAIYK	A				208f2f60-1cbb-4e5b-ba4a-a0138d994a65
1		gi|22003610	ribulose-1,5-bisphosphate carboxylase/oxygenase large subunit, partial [Kayea stylosa]	164	50408	7	6	5	5	169	1	0	1	1451.6	1450.59	1	1450.65	-0.0631	195	206	0	93.29	1.2e-05	K	DDENVNSKPFMR	W				9add7bb2-334b-4be0-a06a-12b9ae6262a5
1		gi|22003610	ribulose-1,5-bisphosphate carboxylase/oxygenase large subunit, partial [Kayea stylosa]	164	50408	7	6	5	5	177	1	0	1	1467.59	1466.59	1	1466.65	-0.0606	195	206	0	65.15	0.0069	K	DDENVNSKPFMR	W	Oxidation (M)	0.000000000010.0		8e07f201-6520-4ce6-8f0b-2a0050986e61
1		gi|22003610	ribulose-1,5-bisphosphate carboxylase/oxygenase large subunit, partial [Kayea stylosa]	164	50408	7	6	5	5	178	1	0	1	1467.62	1466.62	1	1466.65	-0.0304	195	206	0	48.28	0.043	K	DDENVNSKPFMR	W	Oxidation (M)	0.000000000010.0		ad1d5914-626a-4824-8118-2641481df83c
1		gi|22003610	ribulose-1,5-bisphosphate carboxylase/oxygenase large subunit, partial [Kayea stylosa]	164	50408	7	6	5	5	249	1	0	0	1810.88	1809.88	1	1809.8	0.0726	230	245	0	92.55	2.1e-05	K	GHYLNATAGTCEEMIK	R	Oxidation (M)	0.0000000000000100.0		cf4f86cf-da03-466e-86ba-b861b6db9e02
1		gi|1050740	ribulose-1,5-bisphosphate carboxylase [Pinckneya pubens]	164	52285	6	5	4	4	70	1	0	0	1021.58	1020.58	1	1020.52	0.0536	24	32	0	77.84	0.00083	K	DTDILAAFR	V				84d29dc6-368b-4900-bd77-c856650145f7
1		gi|1050740	ribulose-1,5-bisphosphate carboxylase [Pinckneya pubens]	164	52285	6	5	4	4	116	5	0	1	1261.66	1260.65	1	1260.62	0.0335	209	218	0	75.01	0.0017	R	FLFCAEAIYK	S				208f2f60-1cbb-4e5b-ba4a-a0138d994a65
1		gi|1050740	ribulose-1,5-bisphosphate carboxylase [Pinckneya pubens]	164	52285	6	5	4	4	117	2	0	0	1261.75	1260.74	1	1260.71	0.0344	331	341	0	101.85	2.6e-06	R	DITLGFVDLLR	D				aa688366-6c2a-4175-bf1c-50be13a24142
1		gi|1050740	ribulose-1,5-bisphosphate carboxylase [Pinckneya pubens]	164	52285	6	5	4	4	169	1	0	0	1451.6	1450.59	1	1450.61	-0.0268	193	204	0	93.29	1.2e-05	K	DDENVNSQPFMR	W				9add7bb2-334b-4be0-a06a-12b9ae6262a5
1		gi|1050740	ribulose-1,5-bisphosphate carboxylase [Pinckneya pubens]	164	52285	6	5	4	4	177	1	0	0	1467.59	1466.59	1	1466.61	-0.0243	193	204	0	65.15	0.0069	K	DDENVNSQPFMR	W	Oxidation (M)	0.000000000010.0		8e07f201-6520-4ce6-8f0b-2a0050986e61
1		gi|1050740	ribulose-1,5-bisphosphate carboxylase [Pinckneya pubens]	164	52285	6	5	4	4	178	1	0	0	1467.62	1466.62	1	1466.61	0.006	193	204	0	48.28	0.043	K	DDENVNSQPFMR	W	Oxidation (M)	0.000000000010.0		ad1d5914-626a-4824-8118-2641481df83c
1		gi|11323505	ribulose-1,5-bisphosphate carboxylase/oxygenase large subunit, partial (chloroplast) [Veronica salicifolia]	163	49348	6	5	4	4	70	1	0	0	1021.58	1020.58	1	1020.52	0.0536	24	32	0	77.84	0.00083	K	DTDILAAFR	V				84d29dc6-368b-4900-bd77-c856650145f7
1		gi|11323505	ribulose-1,5-bisphosphate carboxylase/oxygenase large subunit, partial (chloroplast) [Veronica salicifolia]	163	49348	6	5	4	4	117	2	0	0	1261.75	1260.74	1	1260.71	0.0344	331	341	0	101.85	2.6e-06	R	DITLGFVDLLR	D				aa688366-6c2a-4175-bf1c-50be13a24142
1		gi|11323505	ribulose-1,5-bisphosphate carboxylase/oxygenase large subunit, partial (chloroplast) [Veronica salicifolia]	163	49348	6	5	4	4	169	1	0	0	1451.6	1450.59	1	1450.61	-0.0268	193	204	0	93.29	1.2e-05	K	DDENVNSQPFMR	W				9add7bb2-334b-4be0-a06a-12b9ae6262a5
1		gi|11323505	ribulose-1,5-bisphosphate carboxylase/oxygenase large subunit, partial (chloroplast) [Veronica salicifolia]	163	49348	6	5	4	4	177	1	0	0	1467.59	1466.59	1	1466.61	-0.0243	193	204	0	65.15	0.0069	K	DDENVNSQPFMR	W	Oxidation (M)	0.000000000010.0		8e07f201-6520-4ce6-8f0b-2a0050986e61
1		gi|11323505	ribulose-1,5-bisphosphate carboxylase/oxygenase large subunit, partial (chloroplast) [Veronica salicifolia]	163	49348	6	5	4	4	178	1	0	0	1467.62	1466.62	1	1466.61	0.006	193	204	0	48.28	0.043	K	DDENVNSQPFMR	W	Oxidation (M)	0.000000000010.0		ad1d5914-626a-4824-8118-2641481df83c
1		gi|11323505	ribulose-1,5-bisphosphate carboxylase/oxygenase large subunit, partial (chloroplast) [Veronica salicifolia]	163	49348	6	5	4	4	190	1	0	0	1497.7	1496.69	1	1496.7	-0.0151	311	325	0	71.08	0.0016	R	MSGGDHIHSGTVVGK	L	Oxidation (M)	0.100000000000000.0		3010fe4d-82cd-4323-934a-cbbcc31a34ee
1		gi|125991555	ribulose-1,5-bisphosphate carboxylase/oxygenase large subunit [Polhillia pallens]	162	47623	6	4	4	3	70	1	0	0	1021.58	1020.58	1	1020.52	0.0536	5	13	0	77.84	0.00083	K	DTDILAAFR	V				84d29dc6-368b-4900-bd77-c856650145f7
1		gi|125991555	ribulose-1,5-bisphosphate carboxylase/oxygenase large subunit [Polhillia pallens]	162	47623	6	4	4	3	71	1	0	1	1023.46	1022.45	1	1022.47	-0.0173	323	330	1	50.68	0.092	R	DDFVEKDR	S				bffdb68b-84c5-40f5-a550-eb469cc6c48d
1		gi|125991555	ribulose-1,5-bisphosphate carboxylase/oxygenase large subunit [Polhillia pallens]	162	47623	6	4	4	3	72	1	0	1	1023.46	1022.45	1	1022.47	-0.0157	323	330	1	48.87	0.091	R	DDFVEKDR	S				5f44fb3d-87a9-437e-8b6e-907154a5b7b8
1		gi|125991555	ribulose-1,5-bisphosphate carboxylase/oxygenase large subunit [Polhillia pallens]	162	47623	6	4	4	3	174	1	0	1	1462.77	1461.76	1	1461.73	0.0269	88	100	0	94.78	1.6e-05	K	MFTSIVGNVFGFK	A	Oxidation (M)	0.1000000000000.0		fe897e45-530a-4e1b-8bcb-c3ca28fba215
1		gi|125991555	ribulose-1,5-bisphosphate carboxylase/oxygenase large subunit [Polhillia pallens]	162	47623	6	4	4	3	175	1	0	1	1462.77	1461.76	1	1461.73	0.0294	88	100	0	77.85	4.1e-05	K	MFTSIVGNVFGFK	A	Oxidation (M)	0.1000000000000.0		c4806180-14c9-4abe-8c44-16d22e727aff
1		gi|125991555	ribulose-1,5-bisphosphate carboxylase/oxygenase large subunit [Polhillia pallens]	162	47623	6	4	4	3	249	1	0	0	1810.88	1809.88	1	1809.8	0.0726	209	224	0	92.55	2.1e-05	K	GHYLNATAGTCEEMIK	R	Oxidation (M)	0.0000000000000100.0		cf4f86cf-da03-466e-86ba-b861b6db9e02
1		gi|125857481	ribulose-1,5-bisphosphate carboxylase/oxygenase large subunit [Phyllobolus splendens]	160	26396	3	3	3	3	117	2	0	0	1261.75	1260.74	1	1260.71	0.0344	104	114	0	101.85	2.6e-06	R	DITLGFVDLLR	D				aa688366-6c2a-4175-bf1c-50be13a24142
1		gi|125857481	ribulose-1,5-bisphosphate carboxylase/oxygenase large subunit [Phyllobolus splendens]	160	26396	3	3	3	3	202	1	0	0	1546.77	1545.76	1	1545.73	0.0348	215	227	0	91.76	3e-05	K	WSPELAAACEVWK	E				94157d68-1ffb-41d7-be86-fa11548b3061
1		gi|125857481	ribulose-1,5-bisphosphate carboxylase/oxygenase large subunit [Phyllobolus splendens]	160	26396	3	3	3	3	249	1	0	0	1810.88	1809.88	1	1809.8	0.0726	1	16	0	92.55	2.1e-05	-	GHYLNATAGTCEEMIK	R	Oxidation (M)	0.0000000000000100.0		cf4f86cf-da03-466e-86ba-b861b6db9e02
1		gi|11990177	ribulose-1,5-bisphosphate carboxylase/oxygenase large subunit [Carpacoce sp. Bremer 3708]	160	52292	6	5	4	4	116	5	0	0	1261.66	1260.65	1	1260.62	0.0335	209	218	0	75.01	0.0017	R	FLFCAEAIYK	A				208f2f60-1cbb-4e5b-ba4a-a0138d994a65
1		gi|11990177	ribulose-1,5-bisphosphate carboxylase/oxygenase large subunit [Carpacoce sp. Bremer 3708]	160	52292	6	5	4	4	117	2	0	0	1261.75	1260.74	1	1260.71	0.0344	331	341	0	101.85	2.6e-06	R	DITLGFVDLLR	D				aa688366-6c2a-4175-bf1c-50be13a24142
1		gi|11990177	ribulose-1,5-bisphosphate carboxylase/oxygenase large subunit [Carpacoce sp. Bremer 3708]	160	52292	6	5	4	4	169	1	0	0	1451.6	1450.59	1	1450.61	-0.0268	193	204	0	93.29	1.2e-05	K	DDENVNSQPFMR	W				9add7bb2-334b-4be0-a06a-12b9ae6262a5
1		gi|11990177	ribulose-1,5-bisphosphate carboxylase/oxygenase large subunit [Carpacoce sp. Bremer 3708]	160	52292	6	5	4	4	177	1	0	0	1467.59	1466.59	1	1466.61	-0.0243	193	204	0	65.15	0.0069	K	DDENVNSQPFMR	W	Oxidation (M)	0.000000000010.0		8e07f201-6520-4ce6-8f0b-2a0050986e61
1		gi|11990177	ribulose-1,5-bisphosphate carboxylase/oxygenase large subunit [Carpacoce sp. Bremer 3708]	160	52292	6	5	4	4	178	1	0	0	1467.62	1466.62	1	1466.61	0.006	193	204	0	48.28	0.043	K	DDENVNSQPFMR	W	Oxidation (M)	0.000000000010.0		ad1d5914-626a-4824-8118-2641481df83c
1		gi|11990177	ribulose-1,5-bisphosphate carboxylase/oxygenase large subunit [Carpacoce sp. Bremer 3708]	160	52292	6	5	4	4	190	1	0	0	1497.7	1496.69	1	1496.7	-0.0151	311	325	0	71.08	0.0016	R	MSGGDHIHSGTVVGK	L	Oxidation (M)	0.100000000000000.0		3010fe4d-82cd-4323-934a-cbbcc31a34ee
1		gi|22711949	ribulose-1,5-bisphosphate carboxylase/oxygenase large subunit [Chaetosphaeridium globosum]	158	53099	7	6	5	5	70	1	0	0	1021.58	1020.58	1	1020.52	0.0536	33	41	0	77.84	0.00083	K	DTDILAAFR	M				84d29dc6-368b-4900-bd77-c856650145f7
1		gi|22711949	ribulose-1,5-bisphosphate carboxylase/oxygenase large subunit [Chaetosphaeridium globosum]	158	53099	7	6	5	5	169	1	0	0	1451.6	1450.59	1	1450.61	-0.0268	202	213	0	93.29	1.2e-05	K	DDENVNSQPFMR	W				9add7bb2-334b-4be0-a06a-12b9ae6262a5
1		gi|22711949	ribulose-1,5-bisphosphate carboxylase/oxygenase large subunit [Chaetosphaeridium globosum]	158	53099	7	6	5	5	177	1	0	0	1467.59	1466.59	1	1466.61	-0.0243	202	213	0	65.15	0.0069	K	DDENVNSQPFMR	W	Oxidation (M)	0.000000000010.0		8e07f201-6520-4ce6-8f0b-2a0050986e61
1		gi|22711949	ribulose-1,5-bisphosphate carboxylase/oxygenase large subunit [Chaetosphaeridium globosum]	158	53099	7	6	5	5	178	1	0	0	1467.62	1466.62	1	1466.61	0.006	202	213	0	48.28	0.043	K	DDENVNSQPFMR	W	Oxidation (M)	0.000000000010.0		ad1d5914-626a-4824-8118-2641481df83c
1		gi|22711949	ribulose-1,5-bisphosphate carboxylase/oxygenase large subunit [Chaetosphaeridium globosum]	158	53099	7	6	5	5	190	1	0	0	1497.7	1496.69	1	1496.7	-0.0151	320	334	0	71.08	0.0016	R	MSGGDHIHSGTVVGK	L	Oxidation (M)	0.100000000000000.0		3010fe4d-82cd-4323-934a-cbbcc31a34ee
1		gi|22711949	ribulose-1,5-bisphosphate carboxylase/oxygenase large subunit [Chaetosphaeridium globosum]	158	53099	7	6	5	5	202	1	0	0	1546.77	1545.76	1	1545.73	0.0348	451	463	0	91.76	3e-05	K	WSPELAAACEVWK	E				94157d68-1ffb-41d7-be86-fa11548b3061
1		gi|22711949	ribulose-1,5-bisphosphate carboxylase/oxygenase large subunit [Chaetosphaeridium globosum]	158	53099	7	6	5	5	367	1	0	1	3860.89	3859.88	1	3859.82	0.0576	42	79	0	63.68	0.0054	R	MTPQAGVPPEEAGAAVAAESSTGTWTTVWTDGLTSLDR	Y				79172f3d-2d55-45e1-bad3-cacd4379aa60
1		gi|115564975	ribulose 1,5-bisphosphate carboxilase/oxigenase large subunit [Sabia campanulata]	158	52383	5	4	3	3	169	1	0	0	1451.6	1450.59	1	1450.61	-0.0268	195	206	0	93.29	1.2e-05	K	DDENVNSQPFMR	W				9add7bb2-334b-4be0-a06a-12b9ae6262a5
1		gi|115564975	ribulose 1,5-bisphosphate carboxilase/oxigenase large subunit [Sabia campanulata]	158	52383	5	4	3	3	177	1	0	0	1467.59	1466.59	1	1466.61	-0.0243	195	206	0	65.15	0.0069	K	DDENVNSQPFMR	W	Oxidation (M)	0.000000000010.0		8e07f201-6520-4ce6-8f0b-2a0050986e61
1		gi|115564975	ribulose 1,5-bisphosphate carboxilase/oxigenase large subunit [Sabia campanulata]	158	52383	5	4	3	3	178	1	0	0	1467.62	1466.62	1	1466.61	0.006	195	206	0	48.28	0.043	K	DDENVNSQPFMR	W	Oxidation (M)	0.000000000010.0		ad1d5914-626a-4824-8118-2641481df83c
1		gi|115564975	ribulose 1,5-bisphosphate carboxilase/oxigenase large subunit [Sabia campanulata]	158	52383	5	4	3	3	202	1	0	0	1546.77	1545.76	1	1545.73	0.0348	444	456	0	91.76	3e-05	K	WSPELAAACEVWK	E				94157d68-1ffb-41d7-be86-fa11548b3061
1		gi|115564975	ribulose 1,5-bisphosphate carboxilase/oxigenase large subunit [Sabia campanulata]	158	52383	5	4	3	3	249	1	0	0	1810.88	1809.88	1	1809.8	0.0726	230	245	0	92.55	2.1e-05	K	GHYLNATAGTCEEMIK	R	Oxidation (M)	0.0000000000000100.0		cf4f86cf-da03-466e-86ba-b861b6db9e02
1		gi|156622931	large subunit of ribulose-1,5-bisphosphate carboxylase/oxygenase [Trichomanes ingae]	157	44602	6	5	4	4	70	1	0	0	1021.58	1020.58	1	1020.52	0.0536	9	17	0	77.84	0.00083	K	DTDILAAFR	M				84d29dc6-368b-4900-bd77-c856650145f7
1		gi|156622931	large subunit of ribulose-1,5-bisphosphate carboxylase/oxygenase [Trichomanes ingae]	157	44602	6	5	4	4	117	2	0	0	1261.75	1260.74	1	1260.71	0.0344	316	326	0	101.85	2.6e-06	R	DITLGFVDLLR	D				aa688366-6c2a-4175-bf1c-50be13a24142
1		gi|156622931	large subunit of ribulose-1,5-bisphosphate carboxylase/oxygenase [Trichomanes ingae]	157	44602	6	5	4	4	169	1	0	0	1451.6	1450.59	1	1450.61	-0.0268	178	189	0	93.29	1.2e-05	K	DDENVNSQPFMR	W				9add7bb2-334b-4be0-a06a-12b9ae6262a5
1		gi|156622931	large subunit of ribulose-1,5-bisphosphate carboxylase/oxygenase [Trichomanes ingae]	157	44602	6	5	4	4	177	1	0	0	1467.59	1466.59	1	1466.61	-0.0243	178	189	0	65.15	0.0069	K	DDENVNSQPFMR	W	Oxidation (M)	0.000000000010.0		8e07f201-6520-4ce6-8f0b-2a0050986e61
1		gi|156622931	large subunit of ribulose-1,5-bisphosphate carboxylase/oxygenase [Trichomanes ingae]	157	44602	6	5	4	4	178	1	0	0	1467.62	1466.62	1	1466.61	0.006	178	189	0	48.28	0.043	K	DDENVNSQPFMR	W	Oxidation (M)	0.000000000010.0		ad1d5914-626a-4824-8118-2641481df83c
1		gi|156622931	large subunit of ribulose-1,5-bisphosphate carboxylase/oxygenase [Trichomanes ingae]	157	44602	6	5	4	4	367	1	0	1	3860.89	3859.88	1	3859.82	0.0576	18	55	0	63.68	0.0054	R	MTPQAGVPPEEAGAAVAAESSTGTWTTVWTDGLTSLDR	Y				79172f3d-2d55-45e1-bad3-cacd4379aa60
1		gi|17154583	ribulose-1,5-bisphosphate carboxylase/oxygenase large subunit [Iris dichotoma]	157	52374	6	5	4	4	70	1	0	0	1021.58	1020.58	1	1020.52	0.0536	26	34	0	77.84	0.00083	K	DTDILAAFR	V				84d29dc6-368b-4900-bd77-c856650145f7
1		gi|17154583	ribulose-1,5-bisphosphate carboxylase/oxygenase large subunit [Iris dichotoma]	157	52374	6	5	4	4	115	1	0	1	1257.69	1256.69	1	1256.67	0.014	429	439	1	95.97	1.4e-05	R	DLAKEGNEIIR	E				bcc600e8-1e0b-4157-b229-5a5a2d1d6899
1		gi|17154583	ribulose-1,5-bisphosphate carboxylase/oxygenase large subunit [Iris dichotoma]	157	52374	6	5	4	4	116	5	0	0	1261.66	1260.65	1	1260.62	0.0335	211	220	0	75.01	0.0017	R	FLFCAEAIYK	A				208f2f60-1cbb-4e5b-ba4a-a0138d994a65
1		gi|17154583	ribulose-1,5-bisphosphate carboxylase/oxygenase large subunit [Iris dichotoma]	157	52374	6	5	4	4	169	1	0	0	1451.6	1450.59	1	1450.61	-0.0268	195	206	0	93.29	1.2e-05	K	DDENVNSQPFMR	W				9add7bb2-334b-4be0-a06a-12b9ae6262a5
1		gi|17154583	ribulose-1,5-bisphosphate carboxylase/oxygenase large subunit [Iris dichotoma]	157	52374	6	5	4	4	177	1	0	0	1467.59	1466.59	1	1466.61	-0.0243	195	206	0	65.15	0.0069	K	DDENVNSQPFMR	W	Oxidation (M)	0.000000000010.0		8e07f201-6520-4ce6-8f0b-2a0050986e61
1		gi|17154583	ribulose-1,5-bisphosphate carboxylase/oxygenase large subunit [Iris dichotoma]	157	52374	6	5	4	4	178	1	0	0	1467.62	1466.62	1	1466.61	0.006	195	206	0	48.28	0.043	K	DDENVNSQPFMR	W	Oxidation (M)	0.000000000010.0		ad1d5914-626a-4824-8118-2641481df83c
1		gi|155029257	ribulose-1,5-bisphosphate carboxylase/oxygenase large subunit [Micrandra spruceana]	157	49028	4	4	4	4	70	1	0	0	1021.58	1020.58	1	1020.52	0.0536	23	31	0	77.84	0.00083	K	DTDILAAFR	V				84d29dc6-368b-4900-bd77-c856650145f7
1		gi|155029257	ribulose-1,5-bisphosphate carboxylase/oxygenase large subunit [Micrandra spruceana]	157	49028	4	4	4	4	116	5	0	0	1261.66	1260.65	1	1260.62	0.0335	208	217	0	75.01	0.0017	R	FLFCAEAIYK	A				208f2f60-1cbb-4e5b-ba4a-a0138d994a65
1		gi|155029257	ribulose-1,5-bisphosphate carboxylase/oxygenase large subunit [Micrandra spruceana]	157	49028	4	4	4	4	117	2	0	0	1261.75	1260.74	1	1260.71	0.0344	330	340	0	101.85	2.6e-06	R	DITLGFVDLLR	D				aa688366-6c2a-4175-bf1c-50be13a24142
1		gi|155029257	ribulose-1,5-bisphosphate carboxylase/oxygenase large subunit [Micrandra spruceana]	157	49028	4	4	4	4	249	1	0	0	1810.88	1809.88	1	1809.8	0.0726	227	242	0	92.55	2.1e-05	K	GHYLNATAGTCEEMIK	R	Oxidation (M)	0.0000000000000100.0		cf4f86cf-da03-466e-86ba-b861b6db9e02
1		gi|1518175	ribulose-1,5-bisphosphate carboxylase/oxygenase large subunit [Agapanthus africanus]	156	49903	6	5	4	4	70	1	0	0	1021.58	1020.58	1	1020.52	0.0536	24	32	0	77.84	0.00083	K	DTDILAAFR	V				84d29dc6-368b-4900-bd77-c856650145f7
1		gi|1518175	ribulose-1,5-bisphosphate carboxylase/oxygenase large subunit [Agapanthus africanus]	156	49903	6	5	4	4	116	1	0	1	1261.66	1260.65	1	1260.62	0.0335	209	218	0	77.06	0.0011	R	FIFCAEAIYK	A				208f2f60-1cbb-4e5b-ba4a-a0138d994a65
1		gi|1518175	ribulose-1,5-bisphosphate carboxylase/oxygenase large subunit [Agapanthus africanus]	156	49903	6	5	4	4	169	1	0	0	1451.6	1450.59	1	1450.61	-0.0268	193	204	0	93.29	1.2e-05	K	DDENVNSQPFMR	W				9add7bb2-334b-4be0-a06a-12b9ae6262a5
1		gi|1518175	ribulose-1,5-bisphosphate carboxylase/oxygenase large subunit [Agapanthus africanus]	156	49903	6	5	4	4	177	1	0	0	1467.59	1466.59	1	1466.61	-0.0243	193	204	0	65.15	0.0069	K	DDENVNSQPFMR	W	Oxidation (M)	0.000000000010.0		8e07f201-6520-4ce6-8f0b-2a0050986e61
1		gi|1518175	ribulose-1,5-bisphosphate carboxylase/oxygenase large subunit [Agapanthus africanus]	156	49903	6	5	4	4	178	1	0	0	1467.62	1466.62	1	1466.61	0.006	193	204	0	48.28	0.043	K	DDENVNSQPFMR	W	Oxidation (M)	0.000000000010.0		ad1d5914-626a-4824-8118-2641481df83c
1		gi|1518175	ribulose-1,5-bisphosphate carboxylase/oxygenase large subunit [Agapanthus africanus]	156	49903	6	5	4	4	249	1	0	0	1810.88	1809.88	1	1809.8	0.0726	228	243	0	92.55	2.1e-05	K	GHYLNATAGTCEEMIK	R	Oxidation (M)	0.0000000000000100.0		cf4f86cf-da03-466e-86ba-b861b6db9e02
1		gi|253992215	ribulose-1,5-bisphosphate carboxylase/oxygenase large subunit, partial (chloroplast) [Campanula spicata]	156	50501	8	5	5	4	70	1	0	0	1021.58	1020.58	1	1020.52	0.0536	19	27	0	77.84	0.00083	K	DTDILAAFR	V				84d29dc6-368b-4900-bd77-c856650145f7
1		gi|253992215	ribulose-1,5-bisphosphate carboxylase/oxygenase large subunit, partial (chloroplast) [Campanula spicata]	156	50501	8	5	5	4	71	1	0	1	1023.46	1022.45	1	1022.47	-0.0173	337	344	1	50.68	0.092	R	DDFVEKDR	S				bffdb68b-84c5-40f5-a550-eb469cc6c48d
1		gi|253992215	ribulose-1,5-bisphosphate carboxylase/oxygenase large subunit, partial (chloroplast) [Campanula spicata]	156	50501	8	5	5	4	72	1	0	1	1023.46	1022.45	1	1022.47	-0.0157	337	344	1	48.87	0.091	R	DDFVEKDR	S				5f44fb3d-87a9-437e-8b6e-907154a5b7b8
1		gi|253992215	ribulose-1,5-bisphosphate carboxylase/oxygenase large subunit, partial (chloroplast) [Campanula spicata]	156	50501	8	5	5	4	115	1	0	1	1257.69	1256.69	1	1256.67	0.014	422	432	1	95.97	1.4e-05	R	DLAKEGNEIIR	K				bcc600e8-1e0b-4157-b229-5a5a2d1d6899
1		gi|253992215	ribulose-1,5-bisphosphate carboxylase/oxygenase large subunit, partial (chloroplast) [Campanula spicata]	156	50501	8	5	5	4	169	1	0	0	1451.6	1450.59	1	1450.61	-0.0268	188	199	0	93.29	1.2e-05	K	DDENVNSQPFMR	W				9add7bb2-334b-4be0-a06a-12b9ae6262a5
1		gi|253992215	ribulose-1,5-bisphosphate carboxylase/oxygenase large subunit, partial (chloroplast) [Campanula spicata]	156	50501	8	5	5	4	177	1	0	0	1467.59	1466.59	1	1466.61	-0.0243	188	199	0	65.15	0.0069	K	DDENVNSQPFMR	W	Oxidation (M)	0.000000000010.0		8e07f201-6520-4ce6-8f0b-2a0050986e61
1		gi|253992215	ribulose-1,5-bisphosphate carboxylase/oxygenase large subunit, partial (chloroplast) [Campanula spicata]	156	50501	8	5	5	4	178	1	0	0	1467.62	1466.62	1	1466.61	0.006	188	199	0	48.28	0.043	K	DDENVNSQPFMR	W	Oxidation (M)	0.000000000010.0		ad1d5914-626a-4824-8118-2641481df83c
1		gi|253992215	ribulose-1,5-bisphosphate carboxylase/oxygenase large subunit, partial (chloroplast) [Campanula spicata]	156	50501	8	5	5	4	190	1	0	0	1497.7	1496.69	1	1496.7	-0.0151	306	320	0	71.08	0.0016	R	MSGGDHIHSGTVVGK	L	Oxidation (M)	0.100000000000000.0		3010fe4d-82cd-4323-934a-cbbcc31a34ee
1		gi|108951062	ribulose-1,5-bisphosphate carboxylase/oxygenase large subunit [Melothrianthus smilacifolius]	156	50816	4	4	4	4	70	1	0	0	1021.58	1020.58	1	1020.52	0.0536	12	20	0	77.84	0.00083	K	DTDILAAFR	V				84d29dc6-368b-4900-bd77-c856650145f7
1		gi|108951062	ribulose-1,5-bisphosphate carboxylase/oxygenase large subunit [Melothrianthus smilacifolius]	156	50816	4	4	4	4	116	5	0	1	1261.66	1260.65	1	1260.62	0.0335	197	206	0	75.01	0.0017	R	FLFCAEAIYK	S				208f2f60-1cbb-4e5b-ba4a-a0138d994a65
1		gi|108951062	ribulose-1,5-bisphosphate carboxylase/oxygenase large subunit [Melothrianthus smilacifolius]	156	50816	4	4	4	4	117	2	0	0	1261.75	1260.74	1	1260.71	0.0344	319	329	0	101.85	2.6e-06	R	DITLGFVDLLR	D				aa688366-6c2a-4175-bf1c-50be13a24142
1		gi|108951062	ribulose-1,5-bisphosphate carboxylase/oxygenase large subunit [Melothrianthus smilacifolius]	156	50816	4	4	4	4	202	1	0	0	1546.77	1545.76	1	1545.73	0.0348	430	442	0	91.76	3e-05	K	WSPELAAACEVWK	E				94157d68-1ffb-41d7-be86-fa11548b3061
1		gi|148590190	ribulose-1,5-bisphosphate carboxylase/oxygenase large subunit [Monnina phillyreoides]	156	52541	4	4	4	4	70	1	0	0	1021.58	1020.58	1	1020.52	0.0536	30	38	0	77.84	0.00083	K	DTDILAAFR	V				84d29dc6-368b-4900-bd77-c856650145f7
1		gi|148590190	ribulose-1,5-bisphosphate carboxylase/oxygenase large subunit [Monnina phillyreoides]	156	52541	4	4	4	4	117	2	0	0	1261.75	1260.74	1	1260.71	0.0344	337	347	0	101.85	2.6e-06	R	DITLGFVDLLR	D				aa688366-6c2a-4175-bf1c-50be13a24142
1		gi|148590190	ribulose-1,5-bisphosphate carboxylase/oxygenase large subunit [Monnina phillyreoides]	156	52541	4	4	4	4	190	1	0	0	1497.7	1496.69	1	1496.7	-0.0151	317	331	0	71.08	0.0016	R	MSGGDHIHSGTVVGK	L	Oxidation (M)	0.100000000000000.0		3010fe4d-82cd-4323-934a-cbbcc31a34ee
1		gi|148590190	ribulose-1,5-bisphosphate carboxylase/oxygenase large subunit [Monnina phillyreoides]	156	52541	4	4	4	4	249	1	0	0	1810.88	1809.88	1	1809.8	0.0726	234	249	0	92.55	2.1e-05	K	GHYLNATAGTCEEMIK	R	Oxidation (M)	0.0000000000000100.0		cf4f86cf-da03-466e-86ba-b861b6db9e02
1		gi|16565299	ribulose 1,5-bisphosphate carboxylase large subunit [Geogenanthus poeppigii]	156	52876	6	5	4	4	70	1	0	0	1021.58	1020.58	1	1020.52	0.0536	26	34	0	77.84	0.00083	K	DTDILAAFR	V				84d29dc6-368b-4900-bd77-c856650145f7
1		gi|16565299	ribulose 1,5-bisphosphate carboxylase large subunit [Geogenanthus poeppigii]	156	52876	6	5	4	4	116	1	0	1	1261.66	1260.65	1	1260.62	0.0335	211	220	0	77.06	0.0011	R	FIFCAEALYK	A				208f2f60-1cbb-4e5b-ba4a-a0138d994a65
1		gi|16565299	ribulose 1,5-bisphosphate carboxylase large subunit [Geogenanthus poeppigii]	156	52876	6	5	4	4	169	1	0	0	1451.6	1450.59	1	1450.61	-0.0268	195	206	0	93.29	1.2e-05	K	DDENVNSQPFMR	W				9add7bb2-334b-4be0-a06a-12b9ae6262a5
1		gi|16565299	ribulose 1,5-bisphosphate carboxylase large subunit [Geogenanthus poeppigii]	156	52876	6	5	4	4	177	1	0	0	1467.59	1466.59	1	1466.61	-0.0243	195	206	0	65.15	0.0069	K	DDENVNSQPFMR	W	Oxidation (M)	0.000000000010.0		8e07f201-6520-4ce6-8f0b-2a0050986e61
1		gi|16565299	ribulose 1,5-bisphosphate carboxylase large subunit [Geogenanthus poeppigii]	156	52876	6	5	4	4	178	1	0	0	1467.62	1466.62	1	1466.61	0.006	195	206	0	48.28	0.043	K	DDENVNSQPFMR	W	Oxidation (M)	0.000000000010.0		ad1d5914-626a-4824-8118-2641481df83c
1		gi|16565299	ribulose 1,5-bisphosphate carboxylase large subunit [Geogenanthus poeppigii]	156	52876	6	5	4	4	202	1	0	0	1546.77	1545.76	1	1545.73	0.0348	444	456	0	91.76	3e-05	K	WSPELAAACEVWK	E				94157d68-1ffb-41d7-be86-fa11548b3061
1		gi|118441524	ribulose 1,5 bisphosphate carboxylase-oxygenase [Gnidia singularis]	155	51715	4	4	4	4	70	1	0	0	1021.58	1020.58	1	1020.52	0.0536	30	38	0	77.84	0.00083	K	DTDILAAFR	V				84d29dc6-368b-4900-bd77-c856650145f7
1		gi|118441524	ribulose 1,5 bisphosphate carboxylase-oxygenase [Gnidia singularis]	155	51715	4	4	4	4	117	2	0	0	1261.75	1260.74	1	1260.71	0.0344	337	347	0	101.85	2.6e-06	R	DITLGFVDLLR	D				aa688366-6c2a-4175-bf1c-50be13a24142
1		gi|118441524	ribulose 1,5 bisphosphate carboxylase-oxygenase [Gnidia singularis]	155	51715	4	4	4	4	190	1	0	0	1497.7	1496.69	1	1496.7	-0.0151	317	331	0	71.08	0.0016	R	MSGGDHIHSGTVVGK	L	Oxidation (M)	0.100000000000000.0		3010fe4d-82cd-4323-934a-cbbcc31a34ee
1		gi|118441524	ribulose 1,5 bisphosphate carboxylase-oxygenase [Gnidia singularis]	155	51715	4	4	4	4	202	1	0	0	1546.77	1545.76	1	1545.73	0.0348	448	460	0	91.76	3e-05	K	WSPELAAACEVWK	E				94157d68-1ffb-41d7-be86-fa11548b3061
1		gi|10764581	ribulose-1,5-biphosphate carboxylase/oxygenase large subunit [Pancheria engleriana]	154	44475	6	5	4	4	70	1	0	0	1021.58	1020.58	1	1020.52	0.0536	7	15	0	77.84	0.00083	K	DTDILAAFR	V				84d29dc6-368b-4900-bd77-c856650145f7
1		gi|10764581	ribulose-1,5-biphosphate carboxylase/oxygenase large subunit [Pancheria engleriana]	154	44475	6	5	4	4	116	5	0	0	1261.66	1260.65	1	1260.62	0.0335	192	201	0	75.01	0.0017	R	FLFCAEAIYK	A				208f2f60-1cbb-4e5b-ba4a-a0138d994a65
1		gi|10764581	ribulose-1,5-biphosphate carboxylase/oxygenase large subunit [Pancheria engleriana]	154	44475	6	5	4	4	169	1	0	0	1451.6	1450.59	1	1450.61	-0.0268	176	187	0	93.29	1.2e-05	K	DDENVNSQPFMR	W				9add7bb2-334b-4be0-a06a-12b9ae6262a5
1		gi|10764581	ribulose-1,5-biphosphate carboxylase/oxygenase large subunit [Pancheria engleriana]	154	44475	6	5	4	4	177	1	0	0	1467.59	1466.59	1	1466.61	-0.0243	176	187	0	65.15	0.0069	K	DDENVNSQPFMR	W	Oxidation (M)	0.000000000010.0		8e07f201-6520-4ce6-8f0b-2a0050986e61
1		gi|10764581	ribulose-1,5-biphosphate carboxylase/oxygenase large subunit [Pancheria engleriana]	154	44475	6	5	4	4	178	1	0	0	1467.62	1466.62	1	1466.61	0.006	176	187	0	48.28	0.043	K	DDENVNSQPFMR	W	Oxidation (M)	0.000000000010.0		ad1d5914-626a-4824-8118-2641481df83c
1		gi|10764581	ribulose-1,5-biphosphate carboxylase/oxygenase large subunit [Pancheria engleriana]	154	44475	6	5	4	4	249	1	0	0	1810.88	1809.88	1	1809.8	0.0726	211	226	0	92.55	2.1e-05	K	GHYLNATAGTCEEMIK	R	Oxidation (M)	0.0000000000000100.0		cf4f86cf-da03-466e-86ba-b861b6db9e02
1		gi|1040879	ribulose-1,5-bisphosphate carboxylase/oxygenase large subunit, partial (chloroplast) [Aristida congesta subsp. barbicollis]	154	50031	6	5	4	4	70	1	0	0	1021.58	1020.58	1	1020.52	0.0536	23	31	0	77.84	0.00083	K	DTDILAAFR	V				84d29dc6-368b-4900-bd77-c856650145f7
1		gi|1040879	ribulose-1,5-bisphosphate carboxylase/oxygenase large subunit, partial (chloroplast) [Aristida congesta subsp. barbicollis]	154	50031	6	5	4	4	169	1	0	0	1451.6	1450.59	1	1450.61	-0.0268	192	203	0	93.29	1.2e-05	K	DDENVNSQPFMR	W				9add7bb2-334b-4be0-a06a-12b9ae6262a5
1		gi|1040879	ribulose-1,5-bisphosphate carboxylase/oxygenase large subunit, partial (chloroplast) [Aristida congesta subsp. barbicollis]	154	50031	6	5	4	4	177	1	0	0	1467.59	1466.59	1	1466.61	-0.0243	192	203	0	65.15	0.0069	K	DDENVNSQPFMR	W	Oxidation (M)	0.000000000010.0		8e07f201-6520-4ce6-8f0b-2a0050986e61
1		gi|1040879	ribulose-1,5-bisphosphate carboxylase/oxygenase large subunit, partial (chloroplast) [Aristida congesta subsp. barbicollis]	154	50031	6	5	4	4	178	1	0	0	1467.62	1466.62	1	1466.61	0.006	192	203	0	48.28	0.043	K	DDENVNSQPFMR	W	Oxidation (M)	0.000000000010.0		ad1d5914-626a-4824-8118-2641481df83c
1		gi|1040879	ribulose-1,5-bisphosphate carboxylase/oxygenase large subunit, partial (chloroplast) [Aristida congesta subsp. barbicollis]	154	50031	6	5	4	4	190	1	0	0	1497.7	1496.69	1	1496.7	-0.0151	310	324	0	71.08	0.0016	R	MSGGDHIHSGTVVGK	L	Oxidation (M)	0.100000000000000.0		3010fe4d-82cd-4323-934a-cbbcc31a34ee
1		gi|1040879	ribulose-1,5-bisphosphate carboxylase/oxygenase large subunit, partial (chloroplast) [Aristida congesta subsp. barbicollis]	154	50031	6	5	4	4	249	1	0	0	1810.88	1809.88	1	1809.8	0.0726	227	242	0	92.55	2.1e-05	K	GHYLNATAGTCEEMIK	R	Oxidation (M)	0.0000000000000100.0		cf4f86cf-da03-466e-86ba-b861b6db9e02
1		gi|108951000	ribulose-1,5-bisphosphate carboxylase/oxygenase large subunit [Thladiantha dubia]	153	53132	8	5	5	4	70	1	0	0	1021.58	1020.58	1	1020.52	0.0536	33	41	0	77.84	0.00083	K	DTDILAAFR	V				84d29dc6-368b-4900-bd77-c856650145f7
1		gi|108951000	ribulose-1,5-bisphosphate carboxylase/oxygenase large subunit [Thladiantha dubia]	153	53132	8	5	5	4	71	1	0	1	1023.46	1022.45	1	1022.47	-0.0173	351	358	1	50.68	0.092	R	DDFVEKDR	S				bffdb68b-84c5-40f5-a550-eb469cc6c48d
1		gi|108951000	ribulose-1,5-bisphosphate carboxylase/oxygenase large subunit [Thladiantha dubia]	153	53132	8	5	5	4	72	1	0	1	1023.46	1022.45	1	1022.47	-0.0157	351	358	1	48.87	0.091	R	DDFVEKDR	S				5f44fb3d-87a9-437e-8b6e-907154a5b7b8
1		gi|108951000	ribulose-1,5-bisphosphate carboxylase/oxygenase large subunit [Thladiantha dubia]	153	53132	8	5	5	4	116	5	0	0	1261.66	1260.65	1	1260.62	0.0335	218	227	0	75.01	0.0017	R	FLFCAEAIYK	S				208f2f60-1cbb-4e5b-ba4a-a0138d994a65
1		gi|108951000	ribulose-1,5-bisphosphate carboxylase/oxygenase large subunit [Thladiantha dubia]	153	53132	8	5	5	4	169	1	0	0	1451.6	1450.59	1	1450.61	-0.0268	202	213	0	93.29	1.2e-05	K	DDENVNSQPFMR	W				9add7bb2-334b-4be0-a06a-12b9ae6262a5
1		gi|108951000	ribulose-1,5-bisphosphate carboxylase/oxygenase large subunit [Thladiantha dubia]	153	53132	8	5	5	4	177	1	0	0	1467.59	1466.59	1	1466.61	-0.0243	202	213	0	65.15	0.0069	K	DDENVNSQPFMR	W	Oxidation (M)	0.000000000010.0		8e07f201-6520-4ce6-8f0b-2a0050986e61
1		gi|108951000	ribulose-1,5-bisphosphate carboxylase/oxygenase large subunit [Thladiantha dubia]	153	53132	8	5	5	4	178	1	0	0	1467.62	1466.62	1	1466.61	0.006	202	213	0	48.28	0.043	K	DDENVNSQPFMR	W	Oxidation (M)	0.000000000010.0		ad1d5914-626a-4824-8118-2641481df83c
1		gi|108951000	ribulose-1,5-bisphosphate carboxylase/oxygenase large subunit [Thladiantha dubia]	153	53132	8	5	5	4	202	1	0	0	1546.77	1545.76	1	1545.73	0.0348	451	463	0	91.76	3e-05	K	WSPELAAACEVWK	E				94157d68-1ffb-41d7-be86-fa11548b3061
1		gi|195928935	ribulose-1,5-bisphosphate carboxylase/oxygenase large subunit [Agalinis obtusifolia]	153	26965	4	4	4	4	116	5	0	0	1261.66	1260.65	1	1260.62	0.0335	11	20	0	75.01	0.0017	R	FLFCAEAIYK	A				208f2f60-1cbb-4e5b-ba4a-a0138d994a65
1		gi|195928935	ribulose-1,5-bisphosphate carboxylase/oxygenase large subunit [Agalinis obtusifolia]	153	26965	4	4	4	4	117	2	0	0	1261.75	1260.74	1	1260.71	0.0344	133	143	0	101.85	2.6e-06	R	DITLGFVDLLR	D				aa688366-6c2a-4175-bf1c-50be13a24142
1		gi|195928935	ribulose-1,5-bisphosphate carboxylase/oxygenase large subunit [Agalinis obtusifolia]	153	26965	4	4	4	4	190	1	0	0	1497.7	1496.69	1	1496.7	-0.0151	113	127	0	71.08	0.0016	R	MSGGDHIHSGTVVGK	L	Oxidation (M)	0.100000000000000.0		3010fe4d-82cd-4323-934a-cbbcc31a34ee
1		gi|195928935	ribulose-1,5-bisphosphate carboxylase/oxygenase large subunit [Agalinis obtusifolia]	153	26965	4	4	4	4	249	1	0	0	1810.88	1809.88	1	1809.8	0.0726	30	45	0	92.55	2.1e-05	K	GHYLNATAGTCEEMIK	R	Oxidation (M)	0.0000000000000100.0		cf4f86cf-da03-466e-86ba-b861b6db9e02
1		gi|1015305	ribulose 1,5-bisphosphate carboxylase, partial (chloroplast) [Eremosyne pectinata]	153	53349	6	5	4	4	70	1	0	0	1021.58	1020.58	1	1020.52	0.0536	33	41	0	77.84	0.00083	K	DTDILAAFR	V				84d29dc6-368b-4900-bd77-c856650145f7
1		gi|1015305	ribulose 1,5-bisphosphate carboxylase, partial (chloroplast) [Eremosyne pectinata]	153	53349	6	5	4	4	169	1	0	0	1451.6	1450.59	1	1450.61	-0.0268	202	213	0	93.29	1.2e-05	K	DDENVNSQPFMR	W				9add7bb2-334b-4be0-a06a-12b9ae6262a5
1		gi|1015305	ribulose 1,5-bisphosphate carboxylase, partial (chloroplast) [Eremosyne pectinata]	153	53349	6	5	4	4	177	1	0	0	1467.59	1466.59	1	1466.61	-0.0243	202	213	0	65.15	0.0069	K	DDENVNSQPFMR	W	Oxidation (M)	0.000000000010.0		8e07f201-6520-4ce6-8f0b-2a0050986e61
1		gi|1015305	ribulose 1,5-bisphosphate carboxylase, partial (chloroplast) [Eremosyne pectinata]	153	53349	6	5	4	4	178	1	0	0	1467.62	1466.62	1	1466.61	0.006	202	213	0	48.28	0.043	K	DDENVNSQPFMR	W	Oxidation (M)	0.000000000010.0		ad1d5914-626a-4824-8118-2641481df83c
1		gi|1015305	ribulose 1,5-bisphosphate carboxylase, partial (chloroplast) [Eremosyne pectinata]	153	53349	6	5	4	4	190	1	0	0	1497.7	1496.69	1	1496.7	-0.0151	320	334	0	71.08	0.0016	R	MSGGDHIHSGTVVGK	L	Oxidation (M)	0.100000000000000.0		3010fe4d-82cd-4323-934a-cbbcc31a34ee
1		gi|1015305	ribulose 1,5-bisphosphate carboxylase, partial (chloroplast) [Eremosyne pectinata]	153	53349	6	5	4	4	202	1	0	0	1546.77	1545.76	1	1545.73	0.0348	451	463	0	91.76	3e-05	K	WSPELAAACEVWK	E				94157d68-1ffb-41d7-be86-fa11548b3061
1		gi|74315448	ribulose-1,5-bisphosphate carboxylase/oxygenase large subunit, partial (chloroplast) [Pinus coulteri]	153	46580	6	5	4	4	70	1	0	0	1021.58	1020.58	1	1020.52	0.0536	8	16	0	77.84	0.00083	K	DTDILAAFR	V				84d29dc6-368b-4900-bd77-c856650145f7
1		gi|74315448	ribulose-1,5-bisphosphate carboxylase/oxygenase large subunit, partial (chloroplast) [Pinus coulteri]	153	46580	6	5	4	4	169	1	0	0	1451.6	1450.59	1	1450.61	-0.0268	177	188	0	93.29	1.2e-05	K	DDENVNSQPFMR	W				9add7bb2-334b-4be0-a06a-12b9ae6262a5
1		gi|74315448	ribulose-1,5-bisphosphate carboxylase/oxygenase large subunit, partial (chloroplast) [Pinus coulteri]	153	46580	6	5	4	4	177	1	0	0	1467.59	1466.59	1	1466.61	-0.0243	177	188	0	65.15	0.0069	K	DDENVNSQPFMR	W	Oxidation (M)	0.000000000010.0		8e07f201-6520-4ce6-8f0b-2a0050986e61
1		gi|74315448	ribulose-1,5-bisphosphate carboxylase/oxygenase large subunit, partial (chloroplast) [Pinus coulteri]	153	46580	6	5	4	4	178	1	0	0	1467.62	1466.62	1	1466.61	0.006	177	188	0	48.28	0.043	K	DDENVNSQPFMR	W	Oxidation (M)	0.000000000010.0		ad1d5914-626a-4824-8118-2641481df83c
1		gi|74315448	ribulose-1,5-bisphosphate carboxylase/oxygenase large subunit, partial (chloroplast) [Pinus coulteri]	153	46580	6	5	4	4	203	1	0	1	1554.77	1553.77	1	1553.7	0.0631	247	260	0	69.38	0.0017	R	GGFTANTSLAHYCR	D				c1900375-d25e-4d75-bf12-7ffa3cd63f3c
1		gi|74315448	ribulose-1,5-bisphosphate carboxylase/oxygenase large subunit, partial (chloroplast) [Pinus coulteri]	153	46580	6	5	4	4	249	1	0	0	1810.88	1809.88	1	1809.8	0.0726	212	227	0	92.55	2.1e-05	K	GHYLNATAGTCEEMIK	R	Oxidation (M)	0.0000000000000100.0		cf4f86cf-da03-466e-86ba-b861b6db9e02
1		gi|1050484	ribulose-1,5-bisphosphate carboxylase [Guettarda uruguensis]	152	52419	5	4	3	3	70	1	0	0	1021.58	1020.58	1	1020.52	0.0536	24	32	0	77.84	0.00083	K	DTDILAAFR	V				84d29dc6-368b-4900-bd77-c856650145f7
1		gi|1050484	ribulose-1,5-bisphosphate carboxylase [Guettarda uruguensis]	152	52419	5	4	3	3	117	2	0	0	1261.75	1260.74	1	1260.71	0.0344	331	341	0	101.85	2.6e-06	R	DITLGFVDLLR	D				aa688366-6c2a-4175-bf1c-50be13a24142
1		gi|1050484	ribulose-1,5-bisphosphate carboxylase [Guettarda uruguensis]	152	52419	5	4	3	3	169	1	0	0	1451.6	1450.59	1	1450.61	-0.0268	193	204	0	93.29	1.2e-05	K	DDENVNSQPFMR	W				9add7bb2-334b-4be0-a06a-12b9ae6262a5
1		gi|1050484	ribulose-1,5-bisphosphate carboxylase [Guettarda uruguensis]	152	52419	5	4	3	3	177	1	0	0	1467.59	1466.59	1	1466.61	-0.0243	193	204	0	65.15	0.0069	K	DDENVNSQPFMR	W	Oxidation (M)	0.000000000010.0		8e07f201-6520-4ce6-8f0b-2a0050986e61
1		gi|1050484	ribulose-1,5-bisphosphate carboxylase [Guettarda uruguensis]	152	52419	5	4	3	3	178	1	0	0	1467.62	1466.62	1	1466.61	0.006	193	204	0	48.28	0.043	K	DDENVNSQPFMR	W	Oxidation (M)	0.000000000010.0		ad1d5914-626a-4824-8118-2641481df83c
1		gi|34821880	ribulose-1,5-bisphosphate carboxylase/oxygenase large subunit [Balsamocarpon brevifolium]	152	52370	6	5	4	4	70	1	0	0	1021.58	1020.58	1	1020.52	0.0536	27	35	0	77.84	0.00083	K	DTDILAAFR	V				84d29dc6-368b-4900-bd77-c856650145f7
1		gi|34821880	ribulose-1,5-bisphosphate carboxylase/oxygenase large subunit [Balsamocarpon brevifolium]	152	52370	6	5	4	4	115	7	0	1	1257.69	1256.69	1	1256.68	0.0027	430	440	1	73.09	0.0027	R	DLARTGNEIIR	E				bcc600e8-1e0b-4157-b229-5a5a2d1d6899
1		gi|34821880	ribulose-1,5-bisphosphate carboxylase/oxygenase large subunit [Balsamocarpon brevifolium]	152	52370	6	5	4	4	169	1	0	0	1451.6	1450.59	1	1450.61	-0.0268	196	207	0	93.29	1.2e-05	K	DDENVNSQPFMR	W				9add7bb2-334b-4be0-a06a-12b9ae6262a5
1		gi|34821880	ribulose-1,5-bisphosphate carboxylase/oxygenase large subunit [Balsamocarpon brevifolium]	152	52370	6	5	4	4	177	1	0	0	1467.59	1466.59	1	1466.61	-0.0243	196	207	0	65.15	0.0069	K	DDENVNSQPFMR	W	Oxidation (M)	0.000000000010.0		8e07f201-6520-4ce6-8f0b-2a0050986e61
1		gi|34821880	ribulose-1,5-bisphosphate carboxylase/oxygenase large subunit [Balsamocarpon brevifolium]	152	52370	6	5	4	4	178	1	0	0	1467.62	1466.62	1	1466.61	0.006	196	207	0	48.28	0.043	K	DDENVNSQPFMR	W	Oxidation (M)	0.000000000010.0		ad1d5914-626a-4824-8118-2641481df83c
1		gi|34821880	ribulose-1,5-bisphosphate carboxylase/oxygenase large subunit [Balsamocarpon brevifolium]	152	52370	6	5	4	4	202	1	0	0	1546.77	1545.76	1	1545.73	0.0348	445	457	0	91.76	3e-05	K	WSPELAAACEVWK	E				94157d68-1ffb-41d7-be86-fa11548b3061
1		gi|12004185	ribulose-1,5-bisphosphate carboxylase/oxygenase large subunit [Primula edelbergii]	151	50455	6	5	4	4	116	5	0	0	1261.66	1260.65	1	1260.62	0.0335	211	220	0	75.01	0.0017	R	FLFCAEAIYK	A				208f2f60-1cbb-4e5b-ba4a-a0138d994a65
1		gi|12004185	ribulose-1,5-bisphosphate carboxylase/oxygenase large subunit [Primula edelbergii]	151	50455	6	5	4	4	169	1	0	0	1451.6	1450.59	1	1450.61	-0.0268	195	206	0	93.29	1.2e-05	K	DDENVNSQPFMR	W				9add7bb2-334b-4be0-a06a-12b9ae6262a5
1		gi|12004185	ribulose-1,5-bisphosphate carboxylase/oxygenase large subunit [Primula edelbergii]	151	50455	6	5	4	4	177	1	0	0	1467.59	1466.59	1	1466.61	-0.0243	195	206	0	65.15	0.0069	K	DDENVNSQPFMR	W	Oxidation (M)	0.000000000010.0		8e07f201-6520-4ce6-8f0b-2a0050986e61
1		gi|12004185	ribulose-1,5-bisphosphate carboxylase/oxygenase large subunit [Primula edelbergii]	151	50455	6	5	4	4	178	1	0	0	1467.62	1466.62	1	1466.61	0.006	195	206	0	48.28	0.043	K	DDENVNSQPFMR	W	Oxidation (M)	0.000000000010.0		ad1d5914-626a-4824-8118-2641481df83c
1		gi|12004185	ribulose-1,5-bisphosphate carboxylase/oxygenase large subunit [Primula edelbergii]	151	50455	6	5	4	4	190	1	0	0	1497.7	1496.69	1	1496.7	-0.0151	313	327	0	71.08	0.0016	R	MSGGDHIHSGTVVGK	L	Oxidation (M)	0.100000000000000.0		3010fe4d-82cd-4323-934a-cbbcc31a34ee
1		gi|12004185	ribulose-1,5-bisphosphate carboxylase/oxygenase large subunit [Primula edelbergii]	151	50455	6	5	4	4	249	1	0	0	1810.88	1809.88	1	1809.8	0.0726	230	245	0	92.55	2.1e-05	K	GHYLNATAGTCEEMIK	R	Oxidation (M)	0.0000000000000100.0		cf4f86cf-da03-466e-86ba-b861b6db9e02
1		gi|11323519	ribulose-1,5-bisphosphate carboxylase/oxygenase large subunit, partial (chloroplast) [Oreobolus pectinatus]	150	49410	6	5	4	4	116	5	0	0	1261.66	1260.65	1	1260.62	0.0335	185	194	0	75.01	0.0017	R	FLFCAEAIYK	A				208f2f60-1cbb-4e5b-ba4a-a0138d994a65
1		gi|11323519	ribulose-1,5-bisphosphate carboxylase/oxygenase large subunit, partial (chloroplast) [Oreobolus pectinatus]	150	49410	6	5	4	4	169	1	0	0	1451.6	1450.59	1	1450.61	-0.0268	169	180	0	93.29	1.2e-05	K	DDENVNSQPFMR	W				9add7bb2-334b-4be0-a06a-12b9ae6262a5
1		gi|11323519	ribulose-1,5-bisphosphate carboxylase/oxygenase large subunit, partial (chloroplast) [Oreobolus pectinatus]	150	49410	6	5	4	4	177	1	0	0	1467.59	1466.59	1	1466.61	-0.0243	169	180	0	65.15	0.0069	K	DDENVNSQPFMR	W	Oxidation (M)	0.000000000010.0		8e07f201-6520-4ce6-8f0b-2a0050986e61
1		gi|11323519	ribulose-1,5-bisphosphate carboxylase/oxygenase large subunit, partial (chloroplast) [Oreobolus pectinatus]	150	49410	6	5	4	4	178	1	0	0	1467.62	1466.62	1	1466.61	0.006	169	180	0	48.28	0.043	K	DDENVNSQPFMR	W	Oxidation (M)	0.000000000010.0		ad1d5914-626a-4824-8118-2641481df83c
1		gi|11323519	ribulose-1,5-bisphosphate carboxylase/oxygenase large subunit, partial (chloroplast) [Oreobolus pectinatus]	150	49410	6	5	4	4	190	1	0	0	1497.7	1496.69	1	1496.7	-0.0151	287	301	0	71.08	0.0016	R	MSGGDHIHSGTVVGK	L	Oxidation (M)	0.100000000000000.0		3010fe4d-82cd-4323-934a-cbbcc31a34ee
1		gi|11323519	ribulose-1,5-bisphosphate carboxylase/oxygenase large subunit, partial (chloroplast) [Oreobolus pectinatus]	150	49410	6	5	4	4	202	1	0	0	1546.77	1545.76	1	1545.73	0.0348	418	430	0	91.76	3e-05	K	WSPELAAACEVWK	A				94157d68-1ffb-41d7-be86-fa11548b3061
1		gi|108951020	ribulose-1,5-bisphosphate carboxylase/oxygenase large subunit [Calycophysum pedunculatum]	149	45990	7	4	4	3	71	1	0	1	1023.46	1022.45	1	1022.47	-0.0173	315	322	1	50.68	0.092	R	DDFVEKDR	S				bffdb68b-84c5-40f5-a550-eb469cc6c48d
1		gi|108951020	ribulose-1,5-bisphosphate carboxylase/oxygenase large subunit [Calycophysum pedunculatum]	149	45990	7	4	4	3	72	1	0	1	1023.46	1022.45	1	1022.47	-0.0157	315	322	1	48.87	0.091	R	DDFVEKDR	S				5f44fb3d-87a9-437e-8b6e-907154a5b7b8
1		gi|108951020	ribulose-1,5-bisphosphate carboxylase/oxygenase large subunit [Calycophysum pedunculatum]	149	45990	7	4	4	3	116	5	0	0	1261.66	1260.65	1	1260.62	0.0335	182	191	0	75.01	0.0017	R	FLFCAEAIYK	S				208f2f60-1cbb-4e5b-ba4a-a0138d994a65
1		gi|108951020	ribulose-1,5-bisphosphate carboxylase/oxygenase large subunit [Calycophysum pedunculatum]	149	45990	7	4	4	3	117	2	0	0	1261.75	1260.74	1	1260.71	0.0344	304	314	0	101.85	2.6e-06	R	DITLGFVDLLR	D				aa688366-6c2a-4175-bf1c-50be13a24142
1		gi|108951020	ribulose-1,5-bisphosphate carboxylase/oxygenase large subunit [Calycophysum pedunculatum]	149	45990	7	4	4	3	169	1	0	0	1451.6	1450.59	1	1450.61	-0.0268	166	177	0	93.29	1.2e-05	K	DDENVNSQPFMR	W				9add7bb2-334b-4be0-a06a-12b9ae6262a5
1		gi|108951020	ribulose-1,5-bisphosphate carboxylase/oxygenase large subunit [Calycophysum pedunculatum]	149	45990	7	4	4	3	177	1	0	0	1467.59	1466.59	1	1466.61	-0.0243	166	177	0	65.15	0.0069	K	DDENVNSQPFMR	W	Oxidation (M)	0.000000000010.0		8e07f201-6520-4ce6-8f0b-2a0050986e61
1		gi|108951020	ribulose-1,5-bisphosphate carboxylase/oxygenase large subunit [Calycophysum pedunculatum]	149	45990	7	4	4	3	178	1	0	0	1467.62	1466.62	1	1466.61	0.006	166	177	0	48.28	0.043	K	DDENVNSQPFMR	W	Oxidation (M)	0.000000000010.0		ad1d5914-626a-4824-8118-2641481df83c
1		gi|133918222	ribulose-1,5-bisphosphate carboxylase [Kunzea vestita]	148	42499	5	4	3	3	117	2	0	0	1261.75	1260.74	1	1260.71	0.0344	301	311	0	101.85	2.6e-06	R	DITLGFVDLLR	D				aa688366-6c2a-4175-bf1c-50be13a24142
1		gi|133918222	ribulose-1,5-bisphosphate carboxylase [Kunzea vestita]	148	42499	5	4	3	3	169	1	0	0	1451.6	1450.59	1	1450.61	-0.0268	163	174	0	93.29	1.2e-05	K	DDENVNSQPFMR	W				9add7bb2-334b-4be0-a06a-12b9ae6262a5
1		gi|133918222	ribulose-1,5-bisphosphate carboxylase [Kunzea vestita]	148	42499	5	4	3	3	177	1	0	0	1467.59	1466.59	1	1466.61	-0.0243	163	174	0	65.15	0.0069	K	DDENVNSQPFMR	W	Oxidation (M)	0.000000000010.0		8e07f201-6520-4ce6-8f0b-2a0050986e61
1		gi|133918222	ribulose-1,5-bisphosphate carboxylase [Kunzea vestita]	148	42499	5	4	3	3	178	1	0	0	1467.62	1466.62	1	1466.61	0.006	163	174	0	48.28	0.043	K	DDENVNSQPFMR	W	Oxidation (M)	0.000000000010.0		ad1d5914-626a-4824-8118-2641481df83c
1		gi|133918222	ribulose-1,5-bisphosphate carboxylase [Kunzea vestita]	148	42499	5	4	3	3	190	1	0	0	1497.7	1496.69	1	1496.7	-0.0151	281	295	0	71.08	0.0016	R	MSGGDHIHSGTVVGK	L	Oxidation (M)	0.100000000000000.0		3010fe4d-82cd-4323-934a-cbbcc31a34ee
1		gi|16565273	ribulose 1,5-bisphosphate carboxylase large subunit [Callisia navicularis]	147	52422	4	4	4	4	70	1	0	0	1021.58	1020.58	1	1020.52	0.0536	25	33	0	77.84	0.00083	K	DTDILAAFR	V				84d29dc6-368b-4900-bd77-c856650145f7
1		gi|16565273	ribulose 1,5-bisphosphate carboxylase large subunit [Callisia navicularis]	147	52422	4	4	4	4	116	5	0	0	1261.66	1260.65	1	1260.62	0.0335	210	219	0	75.01	0.0017	R	FLFCAEAIYK	A				208f2f60-1cbb-4e5b-ba4a-a0138d994a65
1		gi|16565273	ribulose 1,5-bisphosphate carboxylase large subunit [Callisia navicularis]	147	52422	4	4	4	4	202	1	0	0	1546.77	1545.76	1	1545.73	0.0348	443	455	0	91.76	3e-05	K	WSPELAAACEVWK	E				94157d68-1ffb-41d7-be86-fa11548b3061
1		gi|16565273	ribulose 1,5-bisphosphate carboxylase large subunit [Callisia navicularis]	147	52422	4	4	4	4	249	1	0	0	1810.88	1809.88	1	1809.8	0.0726	229	244	0	92.55	2.1e-05	K	GHYLNATAGTCEEMIK	R	Oxidation (M)	0.0000000000000100.0		cf4f86cf-da03-466e-86ba-b861b6db9e02
1		gi|125857823	ribulose-1,5-bisphosphate carboxylase/oxygenase large subunit [Wurmbea spicata]	146	51364	4	4	4	4	70	1	0	0	1021.58	1020.58	1	1020.52	0.0536	23	31	0	77.84	0.00083	K	DTDILAAFR	V				84d29dc6-368b-4900-bd77-c856650145f7
1		gi|125857823	ribulose-1,5-bisphosphate carboxylase/oxygenase large subunit [Wurmbea spicata]	146	51364	4	4	4	4	190	1	0	0	1497.7	1496.69	1	1496.7	-0.0151	310	324	0	71.08	0.0016	R	MSGGDHIHSGTVVGK	L	Oxidation (M)	0.100000000000000.0		3010fe4d-82cd-4323-934a-cbbcc31a34ee
1		gi|125857823	ribulose-1,5-bisphosphate carboxylase/oxygenase large subunit [Wurmbea spicata]	146	51364	4	4	4	4	202	1	0	0	1546.77	1545.76	1	1545.73	0.0348	441	453	0	91.76	3e-05	K	WSPELAAACEVWK	E				94157d68-1ffb-41d7-be86-fa11548b3061
1		gi|125857823	ribulose-1,5-bisphosphate carboxylase/oxygenase large subunit [Wurmbea spicata]	146	51364	4	4	4	4	249	1	0	0	1810.88	1809.88	1	1809.8	0.0726	227	242	0	92.55	2.1e-05	K	GHYLNATAGTCEEMIK	R	Oxidation (M)	0.0000000000000100.0		cf4f86cf-da03-466e-86ba-b861b6db9e02
1		gi|118723684	ribulose-1,5-bisphosphate carboxylase/oxygenase large subunit [Acer laevigatum]	146	50812	3	3	3	3	70	1	0	0	1021.58	1020.58	1	1020.52	0.0536	15	23	0	77.84	0.00083	K	DTDILAAFR	V				84d29dc6-368b-4900-bd77-c856650145f7
1		gi|118723684	ribulose-1,5-bisphosphate carboxylase/oxygenase large subunit [Acer laevigatum]	146	50812	3	3	3	3	117	2	0	0	1261.75	1260.74	1	1260.71	0.0344	322	332	0	101.85	2.6e-06	R	DITLGFVDLLR	D				aa688366-6c2a-4175-bf1c-50be13a24142
1		gi|118723684	ribulose-1,5-bisphosphate carboxylase/oxygenase large subunit [Acer laevigatum]	146	50812	3	3	3	3	249	1	0	0	1810.88	1809.88	1	1809.8	0.0726	219	234	0	92.55	2.1e-05	K	GHYLNATAGTCEEMIK	R	Oxidation (M)	0.0000000000000100.0		cf4f86cf-da03-466e-86ba-b861b6db9e02
1		gi|21634049	ribulose-1,5-bisphosphate carboxylase/oxygenase large subunit [Hildebrandtia promontorii]	146	50353	5	4	3	3	70	1	0	0	1021.58	1020.58	1	1020.52	0.0536	2	10	0	77.84	0.00083	K	DTDILAAFR	V				84d29dc6-368b-4900-bd77-c856650145f7
1		gi|21634049	ribulose-1,5-bisphosphate carboxylase/oxygenase large subunit [Hildebrandtia promontorii]	146	50353	5	4	3	3	115	1	0	1	1257.69	1256.69	1	1256.64	0.0503	405	415	0	95.97	1.4e-05	R	DLAQEGNEIIR	Q				bcc600e8-1e0b-4157-b229-5a5a2d1d6899
1		gi|21634049	ribulose-1,5-bisphosphate carboxylase/oxygenase large subunit [Hildebrandtia promontorii]	146	50353	5	4	3	3	169	1	0	0	1451.6	1450.59	1	1450.61	-0.0268	171	182	0	93.29	1.2e-05	K	DDENVNSQPFMR	W				9add7bb2-334b-4be0-a06a-12b9ae6262a5
1		gi|21634049	ribulose-1,5-bisphosphate carboxylase/oxygenase large subunit [Hildebrandtia promontorii]	146	50353	5	4	3	3	177	1	0	0	1467.59	1466.59	1	1466.61	-0.0243	171	182	0	65.15	0.0069	K	DDENVNSQPFMR	W	Oxidation (M)	0.000000000010.0		8e07f201-6520-4ce6-8f0b-2a0050986e61
1		gi|21634049	ribulose-1,5-bisphosphate carboxylase/oxygenase large subunit [Hildebrandtia promontorii]	146	50353	5	4	3	3	178	1	0	0	1467.62	1466.62	1	1466.61	0.006	171	182	0	48.28	0.043	K	DDENVNSQPFMR	W	Oxidation (M)	0.000000000010.0		ad1d5914-626a-4824-8118-2641481df83c
1		gi|1050489	ribulose-1,5-bisphosphate carboxylase [Hydnophytum formicarum]	145	52328	3	3	3	3	70	1	0	0	1021.58	1020.58	1	1020.52	0.0536	24	32	0	77.84	0.00083	K	DTDILAAFR	V				84d29dc6-368b-4900-bd77-c856650145f7
1		gi|1050489	ribulose-1,5-bisphosphate carboxylase [Hydnophytum formicarum]	145	52328	3	3	3	3	117	2	0	0	1261.75	1260.74	1	1260.71	0.0344	331	341	0	101.85	2.6e-06	R	DITLGFVDLLR	D				aa688366-6c2a-4175-bf1c-50be13a24142
1		gi|1050489	ribulose-1,5-bisphosphate carboxylase [Hydnophytum formicarum]	145	52328	3	3	3	3	202	1	0	0	1546.77	1545.76	1	1545.73	0.0348	442	454	0	91.76	3e-05	K	WSPELAAACEVWK	E				94157d68-1ffb-41d7-be86-fa11548b3061
1		gi|12004189	ribulose-1,5-bisphosphate carboxylase/oxygenase large subunit [Primula sikkimensis]	143	52293	4	4	4	4	116	5	0	0	1261.66	1260.65	1	1260.62	0.0335	211	220	0	75.01	0.0017	R	FLFCAEAIYK	A				208f2f60-1cbb-4e5b-ba4a-a0138d994a65
1		gi|12004189	ribulose-1,5-bisphosphate carboxylase/oxygenase large subunit [Primula sikkimensis]	143	52293	4	4	4	4	190	1	0	0	1497.7	1496.69	1	1496.7	-0.0151	313	327	0	71.08	0.0016	R	MSGGDHIHSGTVVGK	L	Oxidation (M)	0.100000000000000.0		3010fe4d-82cd-4323-934a-cbbcc31a34ee
1		gi|12004189	ribulose-1,5-bisphosphate carboxylase/oxygenase large subunit [Primula sikkimensis]	143	52293	4	4	4	4	202	1	0	0	1546.77	1545.76	1	1545.73	0.0348	444	456	0	91.76	3e-05	K	WSPELAAACEVWK	E				94157d68-1ffb-41d7-be86-fa11548b3061
1		gi|12004189	ribulose-1,5-bisphosphate carboxylase/oxygenase large subunit [Primula sikkimensis]	143	52293	4	4	4	4	249	1	0	0	1810.88	1809.88	1	1809.8	0.0726	230	245	0	92.55	2.1e-05	K	GHYLNATAGTCEEMIK	R	Oxidation (M)	0.0000000000000100.0		cf4f86cf-da03-466e-86ba-b861b6db9e02
1		gi|1040885	ribulose-1,5-bisphosphate carboxylase/oxygenase large subunit, partial (chloroplast) [Chasmanthium latifolium]	143	50111	5	4	3	3	70	1	0	0	1021.58	1020.58	1	1020.52	0.0536	23	31	0	77.84	0.00083	K	DTDILAAFR	V				84d29dc6-368b-4900-bd77-c856650145f7
1		gi|1040885	ribulose-1,5-bisphosphate carboxylase/oxygenase large subunit, partial (chloroplast) [Chasmanthium latifolium]	143	50111	5	4	3	3	169	1	0	0	1451.6	1450.59	1	1450.61	-0.0268	192	203	0	93.29	1.2e-05	K	DDENVNSQPFMR	W				9add7bb2-334b-4be0-a06a-12b9ae6262a5
1		gi|1040885	ribulose-1,5-bisphosphate carboxylase/oxygenase large subunit, partial (chloroplast) [Chasmanthium latifolium]	143	50111	5	4	3	3	177	1	0	0	1467.59	1466.59	1	1466.61	-0.0243	192	203	0	65.15	0.0069	K	DDENVNSQPFMR	W	Oxidation (M)	0.000000000010.0		8e07f201-6520-4ce6-8f0b-2a0050986e61
1		gi|1040885	ribulose-1,5-bisphosphate carboxylase/oxygenase large subunit, partial (chloroplast) [Chasmanthium latifolium]	143	50111	5	4	3	3	178	1	0	0	1467.62	1466.62	1	1466.61	0.006	192	203	0	48.28	0.043	K	DDENVNSQPFMR	W	Oxidation (M)	0.000000000010.0		ad1d5914-626a-4824-8118-2641481df83c
1		gi|1040885	ribulose-1,5-bisphosphate carboxylase/oxygenase large subunit, partial (chloroplast) [Chasmanthium latifolium]	143	50111	5	4	3	3	249	1	0	0	1810.88	1809.88	1	1809.8	0.0726	227	242	0	92.55	2.1e-05	K	GHYLNATAGTCEEMIK	R	Oxidation (M)	0.0000000000000100.0		cf4f86cf-da03-466e-86ba-b861b6db9e02
1		gi|338795969	ribulose-1.5-bisphosphate carboxylase/oxygenase large subunit, partial (chloroplast) [Rhipsalis baccifera subsp. shaferi]	143	49428	3	3	3	3	116	5	0	0	1261.66	1260.65	1	1260.62	0.0335	209	218	0	75.01	0.0017	R	FLFCAEAIYK	A				208f2f60-1cbb-4e5b-ba4a-a0138d994a65
1		gi|338795969	ribulose-1.5-bisphosphate carboxylase/oxygenase large subunit, partial (chloroplast) [Rhipsalis baccifera subsp. shaferi]	143	49428	3	3	3	3	117	2	0	0	1261.75	1260.74	1	1260.71	0.0344	331	341	0	101.85	2.6e-06	R	DITLGFVDLLR	D				aa688366-6c2a-4175-bf1c-50be13a24142
1		gi|338795969	ribulose-1.5-bisphosphate carboxylase/oxygenase large subunit, partial (chloroplast) [Rhipsalis baccifera subsp. shaferi]	143	49428	3	3	3	3	249	1	0	0	1810.88	1809.88	1	1809.8	0.0726	228	243	0	92.55	2.1e-05	K	GHYLNATAGTCEEMIK	R	Oxidation (M)	0.0000000000000100.0		cf4f86cf-da03-466e-86ba-b861b6db9e02
1		gi|10048134	ribulose 1,5-bisphosphate carboxylase [Acronychia acidula]	142	52155	5	4	3	3	70	1	0	0	1021.58	1020.58	1	1020.52	0.0536	27	35	0	77.84	0.00083	K	DTDILAAFR	V				84d29dc6-368b-4900-bd77-c856650145f7
1		gi|10048134	ribulose 1,5-bisphosphate carboxylase [Acronychia acidula]	142	52155	5	4	3	3	169	1	0	0	1451.6	1450.59	1	1450.61	-0.0268	196	207	0	93.29	1.2e-05	K	DDENVNSQPFMR	W				9add7bb2-334b-4be0-a06a-12b9ae6262a5
1		gi|10048134	ribulose 1,5-bisphosphate carboxylase [Acronychia acidula]	142	52155	5	4	3	3	177	1	0	0	1467.59	1466.59	1	1466.61	-0.0243	196	207	0	65.15	0.0069	K	DDENVNSQPFMR	W	Oxidation (M)	0.000000000010.0		8e07f201-6520-4ce6-8f0b-2a0050986e61
1		gi|10048134	ribulose 1,5-bisphosphate carboxylase [Acronychia acidula]	142	52155	5	4	3	3	178	1	0	0	1467.62	1466.62	1	1466.61	0.006	196	207	0	48.28	0.043	K	DDENVNSQPFMR	W	Oxidation (M)	0.000000000010.0		ad1d5914-626a-4824-8118-2641481df83c
1		gi|10048134	ribulose 1,5-bisphosphate carboxylase [Acronychia acidula]	142	52155	5	4	3	3	202	1	0	0	1546.77	1545.76	1	1545.73	0.0348	445	457	0	91.76	3e-05	K	WSPELAAACEVWK	E				94157d68-1ffb-41d7-be86-fa11548b3061
1		gi|45862246	ribulose-1,5-bisphosphate carboxylase/oxygenase large subunit [Metopium brownei]	142	28977	3	3	3	3	116	5	0	0	1261.66	1260.65	1	1260.62	0.0335	2	11	0	75.01	0.0017	R	FLFCAEAIYK	A				208f2f60-1cbb-4e5b-ba4a-a0138d994a65
1		gi|45862246	ribulose-1,5-bisphosphate carboxylase/oxygenase large subunit [Metopium brownei]	142	28977	3	3	3	3	117	2	0	0	1261.75	1260.74	1	1260.71	0.0344	124	134	0	101.85	2.6e-06	R	DITLGFVDLLR	D				aa688366-6c2a-4175-bf1c-50be13a24142
1		gi|45862246	ribulose-1,5-bisphosphate carboxylase/oxygenase large subunit [Metopium brownei]	142	28977	3	3	3	3	202	1	0	0	1546.77	1545.76	1	1545.73	0.0348	235	247	0	91.76	3e-05	K	WSPELAAACEVWK	E				94157d68-1ffb-41d7-be86-fa11548b3061
1		gi|195928937	ribulose-1,5-bisphosphate carboxylase/oxygenase large subunit [Agalinis obtusifolia]	141	26478	3	3	3	3	117	2	0	0	1261.75	1260.74	1	1260.71	0.0344	130	140	0	101.85	2.6e-06	R	DITLGFVDLLR	D				aa688366-6c2a-4175-bf1c-50be13a24142
1		gi|195928937	ribulose-1,5-bisphosphate carboxylase/oxygenase large subunit [Agalinis obtusifolia]	141	26478	3	3	3	3	190	1	0	0	1497.7	1496.69	1	1496.7	-0.0151	110	124	0	71.08	0.0016	R	MSGGDHIHSGTVVGK	L	Oxidation (M)	0.100000000000000.0		3010fe4d-82cd-4323-934a-cbbcc31a34ee
1		gi|195928937	ribulose-1,5-bisphosphate carboxylase/oxygenase large subunit [Agalinis obtusifolia]	141	26478	3	3	3	3	249	1	0	0	1810.88	1809.88	1	1809.8	0.0726	27	42	0	92.55	2.1e-05	K	GHYLNATAGTCEEMIK	R	Oxidation (M)	0.0000000000000100.0		cf4f86cf-da03-466e-86ba-b861b6db9e02
1		gi|125857533	ribulose-1,5-bisphosphate carboxylase/oxygenase large subunit [Hermas villosa]	141	27146	3	3	3	3	117	2	0	0	1261.75	1260.74	1	1260.71	0.0344	111	121	0	101.85	2.6e-06	R	DITLGFVDLLR	D				aa688366-6c2a-4175-bf1c-50be13a24142
1		gi|125857533	ribulose-1,5-bisphosphate carboxylase/oxygenase large subunit [Hermas villosa]	141	27146	3	3	3	3	190	1	0	0	1497.7	1496.69	1	1496.7	-0.0151	91	105	0	71.08	0.0016	R	MSGGDHIHSGTVVGK	L	Oxidation (M)	0.100000000000000.0		3010fe4d-82cd-4323-934a-cbbcc31a34ee
1		gi|125857533	ribulose-1,5-bisphosphate carboxylase/oxygenase large subunit [Hermas villosa]	141	27146	3	3	3	3	202	1	0	0	1546.77	1545.76	1	1545.73	0.0348	222	234	0	91.76	3e-05	K	WSPELAAACEVWK	E				94157d68-1ffb-41d7-be86-fa11548b3061
1		gi|284506622	ribulose-1,5-bisphosphate carboxylase/oxygenase large subunit [Cylindrocystis sp. M3004]	140	49614	7	6	5	5	70	1	0	0	1021.58	1020.58	1	1020.52	0.0536	19	27	0	77.84	0.00083	K	DTDILAAFR	M				84d29dc6-368b-4900-bd77-c856650145f7
1		gi|284506622	ribulose-1,5-bisphosphate carboxylase/oxygenase large subunit [Cylindrocystis sp. M3004]	140	49614	7	6	5	5	116	5	0	0	1261.66	1260.65	1	1260.62	0.0335	204	213	0	75.01	0.0017	R	FLFCAEAIYK	A				208f2f60-1cbb-4e5b-ba4a-a0138d994a65
1		gi|284506622	ribulose-1,5-bisphosphate carboxylase/oxygenase large subunit [Cylindrocystis sp. M3004]	140	49614	7	6	5	5	169	1	0	0	1451.6	1450.59	1	1450.61	-0.0268	188	199	0	93.29	1.2e-05	K	DDENVNSQPFMR	W				9add7bb2-334b-4be0-a06a-12b9ae6262a5
1		gi|284506622	ribulose-1,5-bisphosphate carboxylase/oxygenase large subunit [Cylindrocystis sp. M3004]	140	49614	7	6	5	5	177	1	0	0	1467.59	1466.59	1	1466.61	-0.0243	188	199	0	65.15	0.0069	K	DDENVNSQPFMR	W	Oxidation (M)	0.000000000010.0		8e07f201-6520-4ce6-8f0b-2a0050986e61
1		gi|284506622	ribulose-1,5-bisphosphate carboxylase/oxygenase large subunit [Cylindrocystis sp. M3004]	140	49614	7	6	5	5	178	1	0	0	1467.62	1466.62	1	1466.61	0.006	188	199	0	48.28	0.043	K	DDENVNSQPFMR	W	Oxidation (M)	0.000000000010.0		ad1d5914-626a-4824-8118-2641481df83c
1		gi|284506622	ribulose-1,5-bisphosphate carboxylase/oxygenase large subunit [Cylindrocystis sp. M3004]	140	49614	7	6	5	5	190	1	0	0	1497.7	1496.69	1	1496.7	-0.0151	306	320	0	71.08	0.0016	R	MSGGDHIHSGTVVGK	L	Oxidation (M)	0.100000000000000.0		3010fe4d-82cd-4323-934a-cbbcc31a34ee
1		gi|284506622	ribulose-1,5-bisphosphate carboxylase/oxygenase large subunit [Cylindrocystis sp. M3004]	140	49614	7	6	5	5	367	1	0	1	3860.89	3859.88	1	3859.82	0.0576	28	65	0	63.68	0.0054	R	MTPQAGVPPEEAGAAVAAESSTGTWTTVWTDGLTSLDR	Y				79172f3d-2d55-45e1-bad3-cacd4379aa60
1		gi|108951240	ribulose-1,5-bisphosphate carboxylase/oxygenase large subunit [Telfairia pedata]	140	47270	7	4	4	3	71	1	0	1	1023.46	1022.45	1	1022.47	-0.0173	300	307	1	50.68	0.092	R	DDFVEKDR	S				bffdb68b-84c5-40f5-a550-eb469cc6c48d
1		gi|108951240	ribulose-1,5-bisphosphate carboxylase/oxygenase large subunit [Telfairia pedata]	140	47270	7	4	4	3	72	1	0	1	1023.46	1022.45	1	1022.47	-0.0157	300	307	1	48.87	0.091	R	DDFVEKDR	S				5f44fb3d-87a9-437e-8b6e-907154a5b7b8
1		gi|108951240	ribulose-1,5-bisphosphate carboxylase/oxygenase large subunit [Telfairia pedata]	140	47270	7	4	4	3	116	5	0	0	1261.66	1260.65	1	1260.62	0.0335	167	176	0	75.01	0.0017	R	FLFCAEAIYK	S				208f2f60-1cbb-4e5b-ba4a-a0138d994a65
1		gi|108951240	ribulose-1,5-bisphosphate carboxylase/oxygenase large subunit [Telfairia pedata]	140	47270	7	4	4	3	169	1	0	0	1451.6	1450.59	1	1450.61	-0.0268	151	162	0	93.29	1.2e-05	K	DDENVNSQPFMR	W				9add7bb2-334b-4be0-a06a-12b9ae6262a5
1		gi|108951240	ribulose-1,5-bisphosphate carboxylase/oxygenase large subunit [Telfairia pedata]	140	47270	7	4	4	3	177	1	0	0	1467.59	1466.59	1	1466.61	-0.0243	151	162	0	65.15	0.0069	K	DDENVNSQPFMR	W	Oxidation (M)	0.000000000010.0		8e07f201-6520-4ce6-8f0b-2a0050986e61
1		gi|108951240	ribulose-1,5-bisphosphate carboxylase/oxygenase large subunit [Telfairia pedata]	140	47270	7	4	4	3	178	1	0	0	1467.62	1466.62	1	1466.61	0.006	151	162	0	48.28	0.043	K	DDENVNSQPFMR	W	Oxidation (M)	0.000000000010.0		ad1d5914-626a-4824-8118-2641481df83c
1		gi|108951240	ribulose-1,5-bisphosphate carboxylase/oxygenase large subunit [Telfairia pedata]	140	47270	7	4	4	3	249	1	0	0	1810.88	1809.88	1	1809.8	0.0726	186	201	0	92.55	2.1e-05	K	GHYLNATAGTCEEMIK	R	Oxidation (M)	0.0000000000000100.0		cf4f86cf-da03-466e-86ba-b861b6db9e02
1		gi|9909911	ribulose 1,5-bisphosphate carboxylase [Paranephelium macrophyllum]	140	22573	3	3	3	3	117	2	0	0	1261.75	1260.74	1	1260.71	0.0344	69	79	0	101.85	2.6e-06	R	DITLGFVDLLR	D				aa688366-6c2a-4175-bf1c-50be13a24142
1		gi|9909911	ribulose 1,5-bisphosphate carboxylase [Paranephelium macrophyllum]	140	22573	3	3	3	3	202	1	0	0	1546.77	1545.76	1	1545.73	0.0348	180	192	0	91.76	3e-05	K	WSPELAAACEVWK	E				94157d68-1ffb-41d7-be86-fa11548b3061
1		gi|9909911	ribulose 1,5-bisphosphate carboxylase [Paranephelium macrophyllum]	140	22573	3	3	3	3	203	1	0	1	1554.77	1553.77	1	1553.7	0.0631	1	14	0	69.38	0.0017	-	GGFTANTSLAHYCR	D				c1900375-d25e-4d75-bf12-7ffa3cd63f3c
1		gi|108951130	ribulose-1,5-bisphosphate carboxylase/oxygenase large subunit [Cucumis bryoniifolius]	139	50838	5	4	3	3	116	5	0	0	1261.66	1260.65	1	1260.62	0.0335	197	206	0	75.01	0.0017	R	FLFCAEAIYK	S				208f2f60-1cbb-4e5b-ba4a-a0138d994a65
1		gi|108951130	ribulose-1,5-bisphosphate carboxylase/oxygenase large subunit [Cucumis bryoniifolius]	139	50838	5	4	3	3	169	1	0	0	1451.6	1450.59	1	1450.61	-0.0268	181	192	0	93.29	1.2e-05	K	DDENVNSQPFMR	W				9add7bb2-334b-4be0-a06a-12b9ae6262a5
1		gi|108951130	ribulose-1,5-bisphosphate carboxylase/oxygenase large subunit [Cucumis bryoniifolius]	139	50838	5	4	3	3	177	1	0	0	1467.59	1466.59	1	1466.61	-0.0243	181	192	0	65.15	0.0069	K	DDENVNSQPFMR	W	Oxidation (M)	0.000000000010.0		8e07f201-6520-4ce6-8f0b-2a0050986e61
1		gi|108951130	ribulose-1,5-bisphosphate carboxylase/oxygenase large subunit [Cucumis bryoniifolius]	139	50838	5	4	3	3	178	1	0	0	1467.62	1466.62	1	1466.61	0.006	181	192	0	48.28	0.043	K	DDENVNSQPFMR	W	Oxidation (M)	0.000000000010.0		ad1d5914-626a-4824-8118-2641481df83c
1		gi|108951130	ribulose-1,5-bisphosphate carboxylase/oxygenase large subunit [Cucumis bryoniifolius]	139	50838	5	4	3	3	202	1	0	0	1546.77	1545.76	1	1545.73	0.0348	430	442	0	91.76	3e-05	K	WSPELAAACEVWK	E				94157d68-1ffb-41d7-be86-fa11548b3061
1		gi|11323479	ribulose-1,5-bisphosphate carboxylase/oxygenase large subunit (chloroplast) [Psychrophila novae-zealandiae]	139	53271	5	4	3	3	169	1	0	0	1451.6	1450.59	1	1450.61	-0.0268	202	213	0	93.29	1.2e-05	K	DDENVNSQPFMR	W				9add7bb2-334b-4be0-a06a-12b9ae6262a5
1		gi|11323479	ribulose-1,5-bisphosphate carboxylase/oxygenase large subunit (chloroplast) [Psychrophila novae-zealandiae]	139	53271	5	4	3	3	177	1	0	0	1467.59	1466.59	1	1466.61	-0.0243	202	213	0	65.15	0.0069	K	DDENVNSQPFMR	W	Oxidation (M)	0.000000000010.0		8e07f201-6520-4ce6-8f0b-2a0050986e61
1		gi|11323479	ribulose-1,5-bisphosphate carboxylase/oxygenase large subunit (chloroplast) [Psychrophila novae-zealandiae]	139	53271	5	4	3	3	178	1	0	0	1467.62	1466.62	1	1466.61	0.006	202	213	0	48.28	0.043	K	DDENVNSQPFMR	W	Oxidation (M)	0.000000000010.0		ad1d5914-626a-4824-8118-2641481df83c
1		gi|11323479	ribulose-1,5-bisphosphate carboxylase/oxygenase large subunit (chloroplast) [Psychrophila novae-zealandiae]	139	53271	5	4	3	3	190	1	0	0	1497.7	1496.69	1	1496.7	-0.0151	320	334	0	71.08	0.0016	R	MSGGDHIHSGTVVGK	L	Oxidation (M)	0.100000000000000.0		3010fe4d-82cd-4323-934a-cbbcc31a34ee
1		gi|11323479	ribulose-1,5-bisphosphate carboxylase/oxygenase large subunit (chloroplast) [Psychrophila novae-zealandiae]	139	53271	5	4	3	3	249	1	0	0	1810.88	1809.88	1	1809.8	0.0726	237	252	0	92.55	2.1e-05	K	GHYLNATAGTCEEMIK	R	Oxidation (M)	0.0000000000000100.0		cf4f86cf-da03-466e-86ba-b861b6db9e02
1		gi|121720621	ribulose 1,5-bisphosphate carboxylase/oxygenase large subunit [Nuphar advena]	138	53018	5	4	3	3	169	1	0	0	1451.6	1450.59	1	1450.61	-0.0268	202	213	0	93.29	1.2e-05	K	DDENVNSQPFMR	W				9add7bb2-334b-4be0-a06a-12b9ae6262a5
1		gi|121720621	ribulose 1,5-bisphosphate carboxylase/oxygenase large subunit [Nuphar advena]	138	53018	5	4	3	3	177	1	0	0	1467.59	1466.59	1	1466.61	-0.0243	202	213	0	65.15	0.0069	K	DDENVNSQPFMR	W	Oxidation (M)	0.000000000010.0		8e07f201-6520-4ce6-8f0b-2a0050986e61
1		gi|121720621	ribulose 1,5-bisphosphate carboxylase/oxygenase large subunit [Nuphar advena]	138	53018	5	4	3	3	178	1	0	0	1467.62	1466.62	1	1466.61	0.006	202	213	0	48.28	0.043	K	DDENVNSQPFMR	W	Oxidation (M)	0.000000000010.0		ad1d5914-626a-4824-8118-2641481df83c
1		gi|121720621	ribulose 1,5-bisphosphate carboxylase/oxygenase large subunit [Nuphar advena]	138	53018	5	4	3	3	190	1	0	0	1497.7	1496.69	1	1496.7	-0.0151	320	334	0	71.08	0.0016	R	MSGGDHIHSGTVVGK	L	Oxidation (M)	0.100000000000000.0		3010fe4d-82cd-4323-934a-cbbcc31a34ee
1		gi|121720621	ribulose 1,5-bisphosphate carboxylase/oxygenase large subunit [Nuphar advena]	138	53018	5	4	3	3	202	1	0	0	1546.77	1545.76	1	1545.73	0.0348	451	463	0	91.76	3e-05	K	WSPELAAACEVWK	E				94157d68-1ffb-41d7-be86-fa11548b3061
1		gi|1834330	ribulose-1,5-bisphosphate carboxylase/oxygenase large subunit [Adinandra dumosa]	138	46537	7	4	4	3	71	1	0	1	1023.46	1022.45	1	1022.47	-0.0173	318	325	1	50.68	0.092	R	DDFVEKDR	S				bffdb68b-84c5-40f5-a550-eb469cc6c48d
1		gi|1834330	ribulose-1,5-bisphosphate carboxylase/oxygenase large subunit [Adinandra dumosa]	138	46537	7	4	4	3	72	1	0	1	1023.46	1022.45	1	1022.47	-0.0157	318	325	1	48.87	0.091	R	DDFVEKDR	S				5f44fb3d-87a9-437e-8b6e-907154a5b7b8
1		gi|1834330	ribulose-1,5-bisphosphate carboxylase/oxygenase large subunit [Adinandra dumosa]	138	46537	7	4	4	3	115	7	0	1	1257.69	1256.69	1	1256.68	0.0027	403	413	1	73.09	0.0027	R	DLARTGNEIIR	E				bcc600e8-1e0b-4157-b229-5a5a2d1d6899
1		gi|1834330	ribulose-1,5-bisphosphate carboxylase/oxygenase large subunit [Adinandra dumosa]	138	46537	7	4	4	3	169	1	0	0	1451.6	1450.59	1	1450.61	-0.0268	169	180	0	93.29	1.2e-05	K	DDENVNSQPFMR	X				9add7bb2-334b-4be0-a06a-12b9ae6262a5
1		gi|1834330	ribulose-1,5-bisphosphate carboxylase/oxygenase large subunit [Adinandra dumosa]	138	46537	7	4	4	3	177	1	0	0	1467.59	1466.59	1	1466.61	-0.0243	169	180	0	65.15	0.0069	K	DDENVNSQPFMR	X	Oxidation (M)	0.000000000010.0		8e07f201-6520-4ce6-8f0b-2a0050986e61
1		gi|1834330	ribulose-1,5-bisphosphate carboxylase/oxygenase large subunit [Adinandra dumosa]	138	46537	7	4	4	3	178	1	0	0	1467.62	1466.62	1	1466.61	0.006	169	180	0	48.28	0.043	K	DDENVNSQPFMR	X	Oxidation (M)	0.000000000010.0		ad1d5914-626a-4824-8118-2641481df83c
[truncated: 310 more rows]

[truncated: 1 more sheets: Sheet6- SpGFP 02 Trypsin digest]
